# Supplementary material for: Al3+ substituted U-type hexaferrites Ba4Co2Fe36−xAlxO60: structural, magnetic, electrical and dielectric properties
Source: Royal Society of Chemistry journal article supplement (doi:10.1039/d4tc01659a), 2024-01-01
Supplement: d4tc01659a1.zip [file d4tc01659a1.zip]

## Sheet: Fig. 2 (FTIR)
x = 0.0		x = 0.2		x = 0.4		x = 0.6		x = 0.8		x = 1.0
4000	94.0351	4000	93.1694	4000	92.6458	4000	95.1399	4000	94.0431	4000	95.3873
3999	94.0339	3999	93.1494	3999	92.6569	3999	95.1289	3999	94.0328	3999	95.3642
3998	94.0361	3998	93.1657	3998	92.6734	3998	95.1326	3998	94.0472	3998	95.3736
3997	94.0187	3997	93.1748	3997	92.6752	3997	95.154	3997	94.0631	3997	95.3794
3996	93.9891	3996	93.1665	3996	92.6636	3996	95.1513	3996	94.078	3996	95.3933
3995	93.9902	3995	93.1643	3995	92.6685	3995	95.1541	3995	94.0761	3995	95.4045
3994	93.9975	3994	93.1633	3994	92.6874	3994	95.1631	3994	94.0698	3994	95.4109
3993	93.9944	3993	93.1657	3993	92.6876	3993	95.1595	3993	94.0729	3993	95.4216
3992	93.997	3992	93.1664	3992	92.67	3992	95.1605	3992	94.0766	3992	95.4292
3991	94.0208	3991	93.1656	3991	92.6682	3991	95.1781	3991	94.0906	3991	95.4392
3990	94.0253	3990	93.1554	3990	92.6668	3990	95.1774	3990	94.08	3990	95.4403
3989	94.018	3989	93.1491	3989	92.6634	3989	95.1604	3989	94.062	3989	95.4338
3988	94.0029	3988	93.1636	3988	92.6599	3988	95.1441	3988	94.0575	3988	95.4182
3987	93.9906	3987	93.1808	3987	92.6594	3987	95.1513	3987	94.0599	3987	95.4195
3986	94.0005	3986	93.1718	3986	92.6527	3986	95.1669	3986	94.0565	3986	95.4163
3985	94.0062	3985	93.1686	3985	92.6599	3985	95.1638	3985	94.0594	3985	95.4123
3984	94.0006	3984	93.1784	3984	92.6722	3984	95.159	3984	94.0649	3984	95.4126
3983	93.9996	3983	93.1625	3983	92.6731	3983	95.1563	3983	94.0613	3983	95.4009
3982	94.0079	3982	93.1454	3982	92.6758	3982	95.1554	3982	94.0668	3982	95.4032
3981	94.0035	3981	93.1546	3981	92.6677	3981	95.167	3981	94.0829	3981	95.4147
3980	94.0127	3980	93.1615	3980	92.6661	3980	95.1709	3980	94.0823	3980	95.4118
3979	94.0144	3979	93.1656	3979	92.6861	3979	95.174	3979	94.0847	3979	95.41
3978	93.9981	3978	93.1697	3978	92.6967	3978	95.1843	3978	94.0984	3978	95.4285
3977	93.9918	3977	93.1765	3977	92.6995	3977	95.1967	3977	94.1262	3977	95.4724
3976	93.9942	3976	93.1812	3976	92.6971	3976	95.203	3976	94.1369	3976	95.4918
3975	93.984	3975	93.1683	3975	92.6778	3975	95.2053	3975	94.1213	3975	95.4839
3974	93.9865	3974	93.1569	3974	92.6679	3974	95.2131	3974	94.1227	3974	95.4848
3973	93.9994	3973	93.1574	3973	92.6617	3973	95.2119	3973	94.1147	3973	95.4872
3972	94.0077	3972	93.1701	3972	92.6543	3972	95.2077	3972	94.1043	3972	95.4794
3971	93.9992	3971	93.1717	3971	92.66	3971	95.2031	3971	94.1248	3971	95.4756
3970	93.9934	3970	93.1608	3970	92.6821	3970	95.1929	3970	94.1342	3970	95.4687
3969	93.9861	3969	93.1614	3969	92.6953	3969	95.1944	3969	94.1085	3969	95.436
3968	93.9719	3968	93.1734	3968	92.7003	3968	95.1982	3968	94.0907	3968	95.4401
3967	93.9742	3967	93.1701	3967	92.678	3967	95.1746	3967	94.08	3967	95.437
3966	93.9811	3966	93.1577	3966	92.6472	3966	95.1539	3966	94.0635	3966	95.3991
3965	93.9975	3965	93.1567	3965	92.6579	3965	95.1599	3965	94.0619	3965	95.3976
3964	94.015	3964	93.1671	3964	92.6858	3964	95.1934	3964	94.1012	3964	95.4484
3963	94.0151	3963	93.1723	3963	92.701	3963	95.2317	3963	94.1478	3963	95.5079
3962	93.9908	3962	93.1578	3962	92.6789	3962	95.2223	3962	94.1341	3962	95.5105
3961	93.9713	3961	93.1525	3961	92.6717	3961	95.2066	3961	94.1242	3961	95.5029
3960	93.9661	3960	93.1591	3960	92.6901	3960	95.2108	3960	94.1463	3960	95.4984
3959	93.9651	3959	93.1649	3959	92.6852	3959	95.2034	3959	94.1386	3959	95.484
3958	93.9558	3958	93.1626	3958	92.6708	3958	95.2077	3958	94.1182	3958	95.4855
3957	93.9658	3957	93.147	3957	92.6512	3957	95.1994	3957	94.1043	3957	95.4644
3956	93.9786	3956	93.1368	3956	92.6463	3956	95.1836	3956	94.1069	3956	95.4487
3955	93.9729	3955	93.1492	3955	92.6635	3955	95.1833	3955	94.0984	3955	95.4542
3954	93.9754	3954	93.1567	3954	92.6662	3954	95.1936	3954	94.0817	3954	95.4421
3953	93.9817	3953	93.145	3953	92.6413	3953	95.1904	3953	94.0786	3953	95.4232
3952	93.9722	3952	93.1492	3952	92.6431	3952	95.2047	3952	94.1154	3952	95.4658
3951	93.954	3951	93.1445	3951	92.6605	3951	95.2325	3951	94.1661	3951	95.5402
3950	93.9373	3950	93.136	3950	92.6731	3950	95.2476	3950	94.1905	3950	95.5704
3949	93.9321	3949	93.1732	3949	92.7354	3949	95.3344	3949	94.2857	3949	95.6783
3948	93.9417	3948	93.1948	3948	92.7612	3948	95.3834	3948	94.3529	3948	95.755
3947	93.9475	3947	93.1821	3947	92.7389	3947	95.3311	3947	94.2899	3947	95.6735
3946	93.9424	3946	93.1744	3946	92.737	3946	95.3069	3946	94.2461	3946	95.6203
3945	93.935	3945	93.1469	3945	92.6986	3945	95.2789	3945	94.2181	3945	95.5858
3944	93.9254	3944	93.1195	3944	92.6499	3944	95.2525	3944	94.1988	3944	95.5765
3943	93.9144	3943	93.1076	3943	92.6381	3943	95.2406	3943	94.1781	3943	95.5715
3942	93.9379	3942	93.1197	3942	92.668	3942	95.2524	3942	94.1732	3942	95.5702
3941	93.9598	3941	93.1488	3941	92.704	3941	95.299	3941	94.2282	3941	95.6124
3940	93.9704	3940	93.1709	3940	92.7008	3940	95.2868	3940	94.2095	3940	95.569
3939	93.9675	3939	93.1717	3939	92.6704	3939	95.2285	3939	94.1392	3939	95.4884
3938	93.9645	3938	93.1535	3938	92.6459	3938	95.1949	3938	94.0958	3938	95.4386
3937	93.9763	3937	93.1519	3937	92.6459	3937	95.1971	3937	94.0854	3937	95.4404
3936	93.9659	3936	93.15	3936	92.6507	3936	95.1978	3936	94.0901	3936	95.4558
3935	93.9406	3935	93.1389	3935	92.6523	3935	95.2023	3935	94.1167	3935	95.4796
3934	93.934	3934	93.1476	3934	92.6898	3934	95.2578	3934	94.1916	3934	95.5846
3933	93.9468	3933	93.1839	3933	92.7481	3933	95.3697	3933	94.3196	3933	95.7603
3932	93.9325	3932	93.1823	3932	92.7406	3932	95.3978	3932	94.3522	3932	95.7939
3931	93.8927	3931	93.1493	3931	92.7058	3931	95.3936	3931	94.3542	3931	95.7731
3930	93.8883	3930	93.115	3930	92.6669	3930	95.3641	3930	94.31	3930	95.7159
3929	93.933	3929	93.1118	3929	92.6616	3929	95.3005	3929	94.2187	3929	95.6153
3928	93.9612	3928	93.1358	3928	92.667	3928	95.2823	3928	94.1886	3928	95.5785
3927	93.9266	3927	93.1149	3927	92.6217	3927	95.2466	3927	94.1502	3927	95.5276
3926	93.8771	3926	93.0695	3926	92.5719	3926	95.2161	3926	94.1313	3926	95.4947
3925	93.8913	3925	93.0745	3925	92.609	3925	95.2392	3925	94.1742	3925	95.5553
3924	93.9119	3924	93.1017	3924	92.6781	3924	95.2992	3924	94.2442	3924	95.6669
3923	93.9097	3923	93.1235	3923	92.7082	3923	95.3571	3923	94.2856	3923	95.7112
3922	93.9172	3922	93.1401	3922	92.7253	3922	95.3709	3922	94.2805	3922	95.687
3921	93.9092	3921	93.1379	3921	92.699	3921	95.3422	3921	94.2575	3921	95.6471
3920	93.9128	3920	93.1217	3920	92.6629	3920	95.303	3920	94.2232	3920	95.6092
3919	93.9322	3919	93.1343	3919	92.7207	3919	95.3588	3919	94.2838	3919	95.712
3918	93.9299	3918	93.1729	3918	92.8046	3918	95.4874	3918	94.4457	3918	95.913
3917	93.9304	3917	93.1493	3917	92.7523	3917	95.4474	3917	94.3978	3917	95.8417
3916	93.9223	3916	93.1019	3916	92.6814	3916	95.3538	3916	94.2888	3916	95.6977
3915	93.9184	3915	93.095	3915	92.6554	3915	95.3204	3915	94.249	3915	95.6358
3914	93.9383	3914	93.1042	3914	92.6347	3914	95.2719	3914	94.1587	3914	95.5338
3913	93.9452	3913	93.1104	3913	92.6193	3913	95.2059	3913	94.057	3913	95.4278
3912	93.945	3912	93.1192	3912	92.6067	3912	95.1468	3912	94.0112	3912	95.372
3911	93.9333	3911	93.1195	3911	92.5924	3911	95.1254	3911	94.0008	3911	95.347
3910	93.9232	3910	93.1278	3910	92.6021	3910	95.1472	3910	94.0029	3910	95.3541
3909	93.939	3909	93.1315	3909	92.6304	3909	95.1817	3909	94.0347	3909	95.394
3908	93.9351	3908	93.1187	3908	92.6444	3908	95.2129	3908	94.0817	3908	95.4367
3907	93.8893	3907	93.0782	3907	92.5876	3907	95.2284	3907	94.1282	3907	95.4913
3906	93.8455	3906	93.0148	3906	92.526	3906	95.2174	3906	94.1278	3906	95.5422
3905	93.8401	3905	93.0741	3905	92.6786	3905	95.4366	3905	94.3741	3905	95.8979
3904	93.8789	3904	93.1655	3904	92.8534	3904	95.7069	3904	94.6862	3904	96.2426
3903	93.8694	3903	93.1785	3903	92.896	3903	95.7988	3903	94.7906	3903	96.3616
3902	93.8395	3902	93.1678	3902	92.8573	3902	95.8379	3902	94.8368	3902	96.3941
3901	93.8609	3901	93.1741	3901	92.8518	3901	95.7897	3901	94.7708	3901	96.3069
3900	93.805	3900	93.1391	3900	92.8259	3900	95.7929	3900	94.7731	3900	96.3072
3899	93.7785	3899	93.0169	3899	92.6455	3899	95.5415	3899	94.4806	3899	95.9501
3898	93.8196	3898	93.0247	3898	92.6331	3898	95.4162	3898	94.3565	3898	95.7833
3897	93.8749	3897	93.0908	3897	92.6873	3897	95.4238	3897	94.3748	3897	95.7654
3896	93.9198	3896	93.1378	3896	92.695	3896	95.3899	3896	94.3228	3896	95.69
3895	93.9277	3895	93.1291	3895	92.6685	3895	95.3423	3895	94.2577	3895	95.6297
3894	93.921	3894	93.0982	3894	92.6358	3894	95.3102	3894	94.2074	3894	95.6058
3893	93.8944	3893	93.0641	3893	92.6295	3893	95.3078	3893	94.2145	3893	95.654
3892	93.8723	3892	93.0742	3892	92.6623	3892	95.4189	3892	94.3722	3892	95.8316
3891	93.8668	3891	93.0897	3891	92.662	3891	95.4605	3891	94.3973	3891	95.8372
3890	93.8742	3890	93.1041	3890	92.6687	3890	95.4428	3890	94.3633	3890	95.7819
3889	93.8958	3889	93.1071	3889	92.6735	3889	95.4299	3889	94.3587	3889	95.7624
3888	93.8943	3888	93.0595	3888	92.6296	3888	95.3402	3888	94.2456	3888	95.6539
3887	93.8572	3887	93.0218	3887	92.6186	3887	95.307	3887	94.2042	3887	95.6607
3886	93.8399	3886	93.0616	3886	92.6572	3886	95.4283	3886	94.3347	3886	95.7747
3885	93.8345	3885	93.1016	3885	92.695	3885	95.5105	3885	94.4286	3885	95.8437
3884	93.825	3884	93.0803	3884	92.6906	3884	95.5444	3884	94.4982	3884	95.9265
3883	93.8702	3883	93.0922	3883	92.6931	3883	95.5386	3883	94.5077	3883	95.9255
3882	93.8673	3882	93.0749	3882	92.6566	3882	95.4848	3882	94.4662	3882	95.8922
3881	93.8073	3881	93.0072	3881	92.5859	3881	95.4348	3881	94.4058	3881	95.8509
3880	93.806	3880	92.9665	3880	92.5827	3880	95.3657	3880	94.2942	3880	95.7724
3879	93.8243	3879	93.0455	3879	92.6322	3879	95.4109	3879	94.3466	3879	95.7939
3878	93.8699	3878	93.1075	3878	92.6546	3878	95.4185	3878	94.3542	3878	95.7586
3877	93.9154	3877	93.1032	3877	92.6356	3877	95.3548	3877	94.2602	3877	95.6309
3876	93.8963	3876	93.0715	3876	92.6035	3876	95.3099	3876	94.206	3876	95.5742
3875	93.8438	3875	93.0339	3875	92.5513	3875	95.3289	3875	94.2475	3875	95.6296
3874	93.8442	3874	93.0114	3874	92.5612	3874	95.3295	3874	94.2566	3874	95.6887
3873	93.8504	3873	93.0886	3873	92.6943	3873	95.4968	3873	94.4453	3873	95.9171
3872	93.8111	3872	93.091	3872	92.7109	3872	95.5976	3872	94.567	3872	96.0499
3871	93.7648	3871	93.0505	3871	92.6469	3871	95.5971	3871	94.5656	3871	96.067
3870	93.7814	3870	93.0715	3870	92.7004	3870	95.6752	3870	94.6388	3870	96.159
3869	93.7473	3869	93.0161	3869	92.647	3869	95.5985	3869	94.5317	3869	96.0322
3868	93.7689	3868	93.028	3868	92.6479	3868	95.5938	3868	94.5591	3868	96.0211
3867	93.8234	3867	93.061	3867	92.6865	3867	95.5944	3867	94.5546	3867	96.0156
3866	93.8526	3866	93.083	3866	92.7214	3866	95.6133	3866	94.5587	3866	96.0414
3865	93.8861	3865	93.0973	3865	92.7278	3865	95.6383	3865	94.5881	3865	96.0603
3864	93.8623	3864	93.0662	3864	92.7036	3864	95.6276	3864	94.5828	3864	96.0794
3863	93.8285	3863	93.0852	3863	92.7572	3863	95.6966	3863	94.6854	3863	96.2035
3862	93.8331	3862	93.099	3862	92.7479	3862	95.6451	3862	94.615	3862	96.076
3861	93.8597	3861	93.0916	3861	92.7092	3861	95.5137	3861	94.4353	3861	95.8683
3860	93.8789	3860	93.1147	3860	92.7056	3860	95.4741	3860	94.4027	3860	95.8341
3859	93.8952	3859	93.1276	3859	92.6971	3859	95.4544	3859	94.384	3859	95.8022
3858	93.8949	3858	93.1063	3858	92.6625	3858	95.4367	3858	94.3481	3858	95.7832
3857	93.8699	3857	93.0333	3857	92.5695	3857	95.3725	3857	94.2735	3857	95.7056
3856	93.7796	3856	92.8688	3856	92.4107	3856	95.1873	3856	94.0387	3856	95.5106
3855	93.5926	3855	92.745	3855	92.3041	3855	95.2945	3855	94.1561	3855	95.7038
3854	93.6495	3854	92.7988	3854	92.3452	3854	95.5507	3854	94.4816	3854	95.8991
3853	93.5716	3853	92.8326	3853	92.5395	3853	95.7178	3853	94.7241	3853	96.2435
3852	93.5081	3852	92.7544	3852	92.4561	3852	95.7139	3852	94.7492	3852	96.2625
3851	93.6825	3851	92.9198	3851	92.5878	3851	95.7178	3851	94.7314	3851	96.1918
3850	93.7731	3850	93.0065	3850	92.6609	3850	95.6452	3850	94.6222	3850	96.0819
3849	93.8439	3849	93.0626	3849	92.6729	3849	95.5009	3849	94.4258	3849	95.8647
3848	93.9042	3848	93.1141	3848	92.7042	3848	95.4191	3848	94.3193	3848	95.7497
3847	93.9182	3847	93.1248	3847	92.6681	3847	95.3579	3847	94.2565	3847	95.6663
3846	93.8945	3846	93.0994	3846	92.6098	3846	95.3018	3846	94.2009	3846	95.5965
3845	93.8593	3845	93.0662	3845	92.5867	3845	95.3102	3845	94.2056	3845	95.6253
3844	93.8455	3844	93.0396	3844	92.5844	3844	95.3722	3844	94.2647	3844	95.7062
3843	93.8337	3843	93.0567	3843	92.6463	3843	95.469	3843	94.364	3843	95.8341
3842	93.7971	3842	93.1004	3842	92.7214	3842	95.6451	3842	94.5829	3842	96.0902
3841	93.7797	3841	93.0911	3841	92.6806	3841	95.708	3841	94.6896	3841	96.1924
3840	93.7908	3840	93.0195	3840	92.6347	3840	95.6345	3840	94.6074	3840	96.1471
3839	93.7482	3839	92.9922	3839	92.6679	3839	95.6981	3839	94.6942	3839	96.2598
3838	93.6939	3838	92.968	3838	92.6048	3838	95.7474	3838	94.7613	3838	96.2374
3837	93.7392	3837	92.9798	3837	92.6067	3837	95.6912	3837	94.6519	3837	96.1154
3836	93.7729	3836	93.0411	3836	92.6978	3836	95.7904	3836	94.7545	3836	96.2773
3835	93.7639	3835	93.0225	3835	92.6396	3835	95.692	3835	94.6286	3835	96.099
3834	93.7737	3834	93.0069	3834	92.6244	3834	95.539	3834	94.4539	3834	95.8993
3833	93.7743	3833	93.0213	3833	92.646	3833	95.5465	3833	94.4742	3833	95.9566
3832	93.8083	3832	93.0492	3832	92.63	3832	95.54	3832	94.4478	3832	95.9262
3831	93.8535	3831	93.061	3831	92.6071	3831	95.4467	3831	94.3227	3831	95.767
3830	93.8559	3830	93.0572	3830	92.6003	3830	95.4276	3830	94.3149	3830	95.7367
3829	93.8705	3829	93.0585	3829	92.5975	3829	95.4369	3829	94.3385	3829	95.7317
3828	93.863	3828	93.0499	3828	92.5748	3828	95.4049	3828	94.3188	3828	95.6922
3827	93.8557	3827	93.055	3827	92.5836	3827	95.3804	3827	94.2891	3827	95.6922
3826	93.852	3826	93.0804	3826	92.6423	3826	95.4139	3826	94.3029	3826	95.7336
3825	93.8344	3825	93.0943	3825	92.664	3825	95.4852	3825	94.3922	3825	95.8053
3824	93.8308	3824	93.0579	3824	92.6085	3824	95.4577	3824	94.3726	3824	95.7809
3823	93.7894	3823	92.9857	3823	92.5458	3823	95.4099	3823	94.3155	3823	95.7961
3822	93.7132	3822	92.9726	3822	92.5253	3822	95.5251	3822	94.4817	3822	95.9921
3821	93.7362	3821	92.9773	3821	92.5692	3821	95.6422	3821	94.639	3821	96.1536
3820	93.7253	3820	92.972	3820	92.592	3820	95.7153	3820	94.6763	3820	96.1732
3819	93.7691	3819	92.9951	3819	92.6445	3819	95.735	3819	94.7049	3819	96.1565
3818	93.8101	3818	92.9966	3818	92.6257	3818	95.6318	3818	94.5714	3818	96.01
3817	93.7851	3817	92.9815	3817	92.5481	3817	95.5304	3817	94.4631	3817	95.8986
3816	93.7308	3816	92.9338	3816	92.4331	3816	95.4078	3816	94.3489	3816	95.7352
3815	93.7138	3815	92.9159	3815	92.4148	3815	95.3362	3815	94.2443	3815	95.6427
3814	93.7634	3814	92.9565	3814	92.4987	3814	95.4003	3814	94.2808	3814	95.6995
3813	93.8363	3813	92.9988	3813	92.5469	3813	95.3645	3813	94.214	3813	95.6112
3812	93.8672	3812	93.0262	3812	92.5629	3812	95.2781	3812	94.1223	3812	95.5007
3811	93.8775	3811	93.0526	3811	92.5638	3811	95.222	3811	94.0746	3811	95.4459
3810	93.8897	3810	93.0617	3810	92.5369	3810	95.2035	3810	94.0799	3810	95.4541
3809	93.872	3809	93.0056	3809	92.4671	3809	95.1642	3809	94.0153	3809	95.4036
3808	93.8252	3808	92.9712	3808	92.4672	3808	95.2428	3808	94.1011	3808	95.5218
3807	93.8249	3807	93.0085	3807	92.5291	3807	95.3987	3807	94.3048	3807	95.7374
3806	93.8362	3806	93.0384	3806	92.5629	3806	95.4438	3806	94.3603	3806	95.789
3805	93.8311	3805	93.0552	3805	92.6044	3805	95.5303	3805	94.4676	3805	95.8949
3804	93.813	3804	93.029	3804	92.5636	3804	95.5333	3804	94.4529	3804	95.8825
3803	93.7556	3803	92.916	3803	92.4124	3803	95.3654	3803	94.2556	3803	95.6957
3802	93.7176	3802	92.9346	3802	92.4354	3802	95.4723	3802	94.4066	3802	95.819
3801	93.721	3801	92.9403	3801	92.4578	3801	95.5436	3801	94.5098	3801	95.9049
3800	93.7316	3800	92.9365	3800	92.4753	3800	95.5218	3800	94.4783	3800	95.9079
3799	93.7812	3799	92.9995	3799	92.5936	3799	95.6202	3799	94.569	3799	96.005
3798	93.8446	3798	93.0256	3798	92.6266	3798	95.5978	3798	94.5093	3798	95.9418
3797	93.8472	3797	93.042	3797	92.6306	3797	95.5667	3797	94.4461	3797	95.8787
3796	93.7991	3796	93.0139	3796	92.5859	3796	95.4537	3796	94.3274	3796	95.7458
3795	93.7994	3795	93.0137	3795	92.5606	3795	95.3667	3795	94.2486	3795	95.6638
3794	93.8495	3794	93.0413	3794	92.5624	3794	95.3283	3794	94.186	3794	95.5736
3793	93.8893	3793	93.0349	3793	92.5519	3793	95.2414	3793	94.0807	3793	95.4199
3792	93.8931	3792	93.0205	3792	92.5357	3792	95.1685	3792	93.9967	3792	95.3334
3791	93.9008	3791	93.043	3791	92.52	3791	95.1517	3791	93.9717	3791	95.3234
3790	93.9108	3790	93.046	3790	92.5013	3790	95.1459	3790	93.9774	3790	95.3336
3789	93.9	3789	93.0307	3789	92.5036	3789	95.1363	3789	93.9719	3789	95.346
3788	93.8752	3788	93.0313	3788	92.5134	3788	95.1612	3788	93.9991	3788	95.3749
3787	93.849	3787	93.0409	3787	92.5101	3787	95.2077	3787	94.0685	3787	95.4138
3786	93.8387	3786	93.0297	3786	92.5085	3786	95.2539	3786	94.1278	3786	95.4707
3785	93.8507	3785	93.0076	3785	92.5115	3785	95.262	3785	94.1356	3785	95.4928
3784	93.8678	3784	93.024	3784	92.5336	3784	95.2813	3784	94.1353	3784	95.5114
3783	93.8701	3783	93.0434	3783	92.5542	3783	95.3043	3783	94.1616	3783	95.5425
3782	93.8665	3782	93.0306	3782	92.5348	3782	95.269	3782	94.1335	3782	95.4984
3781	93.8547	3781	93.0061	3781	92.5091	3781	95.2406	3781	94.1032	3781	95.4816
3780	93.8335	3780	92.9745	3780	92.4792	3780	95.2574	3780	94.1507	3780	95.5218
3779	93.834	3779	92.9707	3779	92.4879	3779	95.2717	3779	94.164	3779	95.5446
3778	93.8312	3778	93.0049	3778	92.5268	3778	95.3086	3778	94.1767	3778	95.5731
3777	93.8302	3777	93.0188	3777	92.5307	3777	95.2829	3777	94.1384	3777	95.5209
3776	93.8418	3776	93.0208	3776	92.5106	3776	95.2199	3776	94.0644	3776	95.4189
3775	93.8693	3775	93.0347	3775	92.5041	3775	95.1845	3775	94.0236	3775	95.3633
3774	93.8959	3774	93.0525	3774	92.507	3774	95.1754	3774	94.0088	3774	95.3463
3773	93.892	3773	93.0471	3773	92.4968	3773	95.195	3773	94.0267	3773	95.3674
3772	93.8581	3772	93.0104	3772	92.474	3772	95.1902	3772	94.0395	3772	95.3973
3771	93.8145	3771	93.006	3771	92.4982	3771	95.2662	3771	94.1541	3771	95.5454
3770	93.8067	3770	93.0462	3770	92.547	3770	95.4026	3770	94.3059	3770	95.7174
3769	93.8059	3769	93.0361	3769	92.5564	3769	95.4223	3769	94.3246	3769	95.7313
3768	93.8098	3768	93.0051	3768	92.5556	3768	95.4302	3768	94.3469	3768	95.7455
3767	93.8225	3767	93.025	3767	92.575	3767	95.4561	3767	94.3548	3767	95.7662
3766	93.8253	3766	93.0258	3766	92.5616	3766	95.4372	3766	94.3112	3766	95.7258
3765	93.83	3765	93.0104	3765	92.5529	3765	95.3984	3765	94.2553	3765	95.6663
3764	93.8325	3764	93.039	3764	92.572	3764	95.3985	3764	94.2815	3764	95.6712
3763	93.8305	3763	93.0491	3763	92.5513	3763	95.3591	3763	94.2363	3763	95.6037
3762	93.8411	3762	93.0225	3762	92.5075	3762	95.295	3762	94.1432	3762	95.5455
3761	93.829	3761	93.0332	3761	92.5234	3761	95.3379	3761	94.1929	3761	95.6534
3760	93.8034	3760	93.0506	3760	92.5706	3760	95.4448	3760	94.3352	3760	95.794
3759	93.7774	3759	93.0134	3759	92.5909	3759	95.4818	3759	94.3848	3759	95.8496
3758	93.7789	3758	93.0323	3758	92.6246	3758	95.5819	3758	94.5085	3758	95.9741
3757	93.815	3757	93.0594	3757	92.6266	3757	95.6111	3757	94.543	3757	95.9799
3756	93.8513	3756	93.074	3756	92.6362	3756	95.5634	3756	94.4739	3756	95.9089
3755	93.8555	3755	93.0812	3755	92.6502	3755	95.5903	3755	94.5149	3755	95.955
3754	93.8024	3754	92.9711	3754	92.5256	3754	95.4665	3754	94.3744	3754	95.8187
3753	93.7361	3753	92.9401	3753	92.4777	3753	95.5033	3753	94.4665	3753	95.8906
3752	93.7971	3752	93.0656	3752	92.6689	3752	95.8283	3752	94.8857	3752	96.2987
3751	93.7425	3751	93.1128	3751	92.8281	3751	96.0441	3751	95.0944	3751	96.6763
3750	93.6794	3750	93.1878	3750	92.9691	3750	96.3882	3750	95.4739	3750	97.1071
3749	93.7334	3749	93.1082	3749	92.8028	3749	96.2495	3749	95.2775	3749	96.7391
3748	93.7519	3748	93.0385	3748	92.7021	3748	96.0266	3748	95.0335	3748	96.5006
3747	93.7465	3747	93.0032	3747	92.6796	3747	95.9528	3747	94.9205	3747	96.4262
3746	93.6699	3746	92.8327	3746	92.5153	3746	95.6589	3746	94.5402	3746	96.097
3745	93.6372	3745	92.831	3745	92.4346	3745	95.5728	3745	94.4455	3745	95.9962
3744	93.5977	3744	92.7921	3744	92.3664	3744	95.5844	3744	94.4954	3744	95.9767
3743	93.6039	3743	92.8462	3743	92.4289	3743	95.6764	3743	94.6383	3743	96.1057
3742	93.7365	3742	93.0038	3742	92.6325	3742	95.8249	3742	94.8288	3742	96.2961
3741	93.8342	3741	93.0581	3741	92.6733	3741	95.7488	3741	94.7275	3741	96.1578
3740	93.88	3740	93.1635	3740	92.7732	3740	95.784	3740	94.7439	3740	96.2032
3739	93.8421	3739	93.1473	3739	92.7517	3739	95.7819	3739	94.747	3739	96.2144
3738	93.8144	3738	93.0923	3738	92.7259	3738	95.7372	3738	94.7192	3738	96.1873
3737	93.7852	3737	93.1043	3737	92.8088	3737	95.9138	3737	94.9599	3737	96.4596
3736	93.7174	3736	93.0834	3736	92.8343	3736	96.0873	3736	95.1644	3736	96.6962
3735	93.6015	3735	92.9321	3735	92.6754	3735	95.9691	3735	95.0352	3735	96.6118
3734	93.6398	3734	92.9758	3734	92.7144	3734	95.979	3734	95.0109	3734	96.5885
3733	93.7198	3733	93.0834	3733	92.8633	3733	96.1407	3733	95.1564	3733	96.7302
3732	93.7618	3732	93.0309	3732	92.7141	3732	95.9156	3732	94.865	3732	96.3441
3731	93.7786	3731	92.9983	3731	92.5783	3731	95.5982	3731	94.5236	3731	95.9447
3730	93.806	3730	93.0019	3730	92.5587	3730	95.5058	3730	94.4208	3730	95.8381
3729	93.8641	3729	93.0539	3729	92.5955	3729	95.5056	3729	94.377	3729	95.8067
3728	93.8751	3728	93.0845	3728	92.6367	3728	95.5193	3728	94.3849	3728	95.8419
3727	93.855	3727	93.1026	3727	92.6815	3727	95.5909	3727	94.4761	3727	95.9456
3726	93.8415	3726	93.1076	3726	92.6896	3726	95.6388	3726	94.5211	3726	96.0085
3725	93.8224	3725	93.079	3725	92.6619	3725	95.625	3725	94.5504	3725	96.0279
3724	93.8003	3724	93.0643	3724	92.6633	3724	95.6293	3724	94.605	3724	96.0645
3723	93.7811	3723	93.0334	3723	92.6446	3723	95.6307	3723	94.5896	3723	96.0528
3722	93.799	3722	92.9903	3722	92.5886	3722	95.5336	3722	94.4276	3722	95.8759
3721	93.811	3721	93.0328	3721	92.6121	3721	95.5367	3721	94.4272	3721	95.8633
3720	93.8217	3720	93.0385	3720	92.6043	3720	95.5414	3720	94.4385	3720	95.8633
3719	93.8356	3719	92.9785	3719	92.5373	3719	95.3946	3719	94.2645	3719	95.6679
3718	93.8335	3718	92.9999	3718	92.5508	3718	95.331	3718	94.2054	3718	95.5914
3717	93.8448	3717	93.0544	3717	92.5621	3717	95.3649	3717	94.2411	3717	95.6193
3716	93.8692	3716	93.0639	3716	92.5551	3716	95.3791	3716	94.2349	3716	95.6181
3715	93.8613	3715	93.0323	3715	92.5332	3715	95.382	3715	94.2135	3715	95.6279
3714	93.7977	3714	92.9546	3714	92.4716	3714	95.3497	3714	94.1694	3714	95.6355
3713	93.7249	3713	92.9471	3713	92.4982	3713	95.4977	3713	94.411	3713	95.8633
3712	93.7572	3712	93.01	3712	92.5748	3712	95.702	3712	94.6691	3712	96.08
3711	93.7511	3711	93.0168	3711	92.6361	3711	95.7941	3711	94.7337	3711	96.2404
3710	93.6671	3710	92.9511	3710	92.6195	3710	95.8024	3710	94.7426	3710	96.2754
3709	93.7058	3709	92.9231	3709	92.5467	3709	95.6126	3709	94.5181	3709	95.9684
3708	93.7799	3708	92.9865	3708	92.5583	3708	95.4963	3708	94.3911	3708	95.8203
3707	93.8135	3707	93.0173	3707	92.5522	3707	95.4322	3707	94.3115	3707	95.7373
3706	93.8461	3706	93.0176	3706	92.5327	3706	95.319	3706	94.1861	3706	95.574
3705	93.8607	3705	93.0251	3705	92.5208	3705	95.2701	3705	94.1283	3705	95.4898
3704	93.8572	3704	93.0142	3704	92.4943	3704	95.2686	3704	94.1056	3704	95.4875
3703	93.8163	3703	92.9756	3703	92.4747	3703	95.3016	3703	94.1207	3703	95.5369
3702	93.7778	3702	92.9566	3702	92.4888	3702	95.3284	3702	94.154	3702	95.5694
3701	93.7775	3701	92.9809	3701	92.5089	3701	95.3198	3701	94.1542	3701	95.5794
3700	93.811	3700	93.0025	3700	92.5049	3700	95.3388	3700	94.1642	3700	95.5979
3699	93.8548	3699	93.0117	3699	92.4887	3699	95.3082	3699	94.1206	3699	95.5261
3698	93.8667	3698	93.0096	3698	92.4874	3698	95.2659	3698	94.0828	3698	95.4506
3697	93.8494	3697	93.0104	3697	92.4893	3697	95.2432	3697	94.0651	3697	95.4289
3696	93.8611	3696	93.0344	3696	92.4936	3696	95.235	3696	94.0551	3696	95.4286
3695	93.8712	3695	93.0507	3695	92.5119	3695	95.2687	3695	94.0938	3695	95.4703
3694	93.8546	3694	93.0253	3694	92.5136	3694	95.2807	3694	94.1193	3694	95.5012
3693	93.8022	3693	92.9784	3693	92.4948	3693	95.2776	3693	94.1271	3693	95.543
3692	93.7546	3692	92.9459	3692	92.4827	3692	95.4035	3692	94.2871	3692	95.726
3691	93.7524	3691	92.9058	3691	92.481	3691	95.4921	3691	94.3818	3691	95.8219
3690	93.7185	3690	92.9202	3690	92.53	3690	95.5655	3690	94.474	3690	95.9446
3689	93.6909	3689	92.9837	3689	92.5929	3689	95.7606	3689	94.7369	3689	96.2037
3688	93.6462	3688	92.8918	3688	92.4559	3688	95.5805	3688	94.5099	3688	95.912
3687	93.649	3687	92.8823	3687	92.4335	3687	95.4587	3687	94.3629	3687	95.7774
3686	93.7399	3686	92.9472	3686	92.4954	3686	95.4678	3686	94.3592	3686	95.769
3685	93.8103	3685	92.969	3685	92.4962	3685	95.3757	3685	94.2167	3685	95.6121
3684	93.8395	3684	92.977	3684	92.4925	3684	95.3021	3684	94.1045	3684	95.5084
3683	93.8562	3683	93.0102	3683	92.5066	3683	95.2829	3683	94.0966	3683	95.4894
3682	93.8533	3682	93.0184	3682	92.5002	3682	95.2738	3682	94.1108	3682	95.4942
3681	93.8461	3681	93.0143	3681	92.4986	3681	95.2952	3681	94.1443	3681	95.5372
3680	93.806	3680	92.9882	3680	92.4966	3680	95.3473	3680	94.2005	3680	95.6007
3679	93.7567	3679	92.9542	3679	92.5123	3679	95.4114	3679	94.279	3679	95.6934
3678	93.7015	3678	92.8916	3678	92.466	3678	95.4345	3678	94.318	3678	95.753
3677	93.6001	3677	92.7428	3677	92.3078	3677	95.3816	3677	94.2752	3677	95.7505
3676	93.6303	3676	92.817	3676	92.4226	3676	95.6255	3676	94.574	3676	96.0502
3675	93.5458	3675	92.7514	3675	92.4182	3675	95.6274	3675	94.5643	3675	96.0914
3674	93.5298	3674	92.7349	3674	92.3461	3674	95.5893	3674	94.5207	3674	96.0164
3673	93.6433	3673	92.8697	3673	92.4787	3673	95.66	3673	94.5958	3673	96.0569
3672	93.6501	3672	92.8523	3672	92.4525	3672	95.5592	3672	94.4727	3672	95.9208
3671	93.6876	3671	92.9122	3671	92.5015	3671	95.6314	3671	94.5554	3671	95.9792
3670	93.6894	3670	92.968	3670	92.612	3670	95.7431	3670	94.6693	3670	96.1397
3669	93.6117	3669	92.8827	3669	92.5387	3669	95.6932	3669	94.6422	3669	96.1386
3668	93.6749	3668	92.8675	3668	92.4555	3668	95.5442	3668	94.445	3668	95.8934
3667	93.7594	3667	92.9244	3667	92.4711	3667	95.4373	3667	94.2927	3667	95.7035
3666	93.8026	3666	92.9621	3666	92.4896	3666	95.3329	3666	94.172	3666	95.5519
3665	93.8151	3665	92.9682	3665	92.471	3665	95.2223	3665	94.0461	3665	95.4153
3664	93.8134	3664	92.958	3664	92.4338	3664	95.164	3664	93.9713	3664	95.3322
3663	93.8279	3663	92.9664	3663	92.4302	3663	95.1661	3663	93.9478	3663	95.3211
3662	93.8281	3662	92.9668	3662	92.4438	3662	95.1634	3662	93.9576	3662	95.3295
3661	93.8331	3661	92.9788	3661	92.4582	3661	95.1802	3661	93.9885	3661	95.3437
3660	93.8373	3660	92.9958	3660	92.467	3660	95.2081	3660	94.0034	3660	95.3568
3659	93.8054	3659	92.981	3659	92.4494	3659	95.2198	3659	94.0199	3659	95.3835
3658	93.7817	3658	92.9529	3658	92.4467	3658	95.2267	3658	94.0325	3658	95.4404
3657	93.7833	3657	92.9696	3657	92.5169	3657	95.3753	3657	94.1948	3657	95.6621
3656	93.7534	3656	92.9625	3656	92.5197	3656	95.4492	3656	94.2455	3656	95.7154
3655	93.7243	3655	92.9513	3655	92.4819	3655	95.4177	3655	94.223	3655	95.6724
3654	93.7547	3654	92.961	3654	92.4958	3654	95.4407	3654	94.2784	3654	95.7237
3653	93.7687	3653	92.9246	3653	92.4583	3653	95.383	3653	94.2069	3653	95.6596
3652	93.7016	3652	92.8482	3652	92.3706	3652	95.3567	3652	94.1961	3652	95.6778
3651	93.6395	3651	92.8072	3651	92.3704	3651	95.4318	3651	94.3395	3651	95.8501
3650	93.6388	3650	92.9891	3650	92.7315	3650	95.9663	3650	94.9908	3650	96.5884
3649	93.5963	3649	93.0858	3649	92.8813	3649	96.3863	3649	95.4367	3649	97.0656
3648	93.5818	3648	93.0353	3648	92.7968	3648	96.3499	3648	95.367	3648	97.0219
3647	93.5573	3647	92.8319	3647	92.4981	3647	95.8493	3647	94.7954	3647	96.3922
3646	93.589	3646	92.8014	3646	92.4017	3646	95.5529	3646	94.4223	3646	95.9588
3645	93.6658	3645	92.8817	3645	92.4482	3645	95.486	3645	94.3401	3645	95.8129
3644	93.753	3644	92.944	3644	92.4758	3644	95.4154	3644	94.261	3644	95.6785
3643	93.7857	3643	92.9591	3643	92.4708	3643	95.3296	3643	94.1655	3643	95.5712
3642	93.7587	3642	92.9372	3642	92.4336	3642	95.247	3642	94.0669	3642	95.4687
3641	93.7419	3641	92.9345	3641	92.4203	3641	95.2175	3641	94.0443	3641	95.4448
3640	93.7678	3640	92.933	3640	92.4287	3640	95.2268	3640	94.0428	3640	95.4545
3639	93.793	3639	92.9311	3639	92.4184	3639	95.2304	3639	94.0205	3639	95.4339
3638	93.7821	3638	92.917	3638	92.3915	3638	95.1863	3638	93.9912	3638	95.3834
3637	93.7849	3637	92.922	3637	92.4071	3637	95.1779	3637	94.0038	3637	95.3999
3636	93.7779	3636	92.921	3636	92.428	3636	95.2079	3636	94.0289	3636	95.4407
3635	93.7602	3635	92.9131	3635	92.43	3635	95.2287	3635	94.0462	3635	95.4718
3634	93.7422	3634	92.9047	3634	92.4214	3634	95.2383	3634	94.0534	3634	95.5081
3633	93.7431	3633	92.921	3633	92.4587	3633	95.3072	3633	94.1394	3633	95.6026
3632	93.7565	3632	92.925	3632	92.4748	3632	95.3744	3632	94.2568	3632	95.7012
3631	93.6998	3631	92.8205	3631	92.3826	3631	95.316	3631	94.1817	3631	95.691
3630	93.6347	3630	92.8022	3630	92.4058	3630	95.435	3630	94.3061	3630	95.8993
3629	93.607	3629	92.8582	3629	92.5581	3629	95.6865	3629	94.5993	3629	96.2129
3628	93.5385	3628	92.8119	3628	92.4785	3628	95.7409	3628	94.6675	3628	96.2031
3627	93.5918	3627	92.8392	3627	92.4694	3627	95.6577	3627	94.5922	3627	96.0622
3626	93.6599	3626	92.8851	3626	92.4562	3626	95.5106	3626	94.3873	3626	95.8375
3625	93.7323	3625	92.9666	3625	92.4742	3625	95.4011	3625	94.2366	3625	95.6921
3624	93.786	3624	93.0059	3624	92.4851	3624	95.3552	3624	94.1657	3624	95.6284
3623	93.8045	3623	92.9737	3623	92.4612	3623	95.3213	3623	94.1169	3623	95.5698
3622	93.7826	3622	92.9295	3622	92.4499	3622	95.3056	3622	94.128	3622	95.5639
3621	93.7317	3621	92.9186	3621	92.4679	3621	95.3361	3621	94.1821	3621	95.65
3620	93.6769	3620	92.9502	3620	92.5383	3620	95.5291	3620	94.3877	3620	95.9104
3619	93.6448	3619	92.939	3619	92.5648	3619	95.6263	3619	94.5024	3619	96.0595
3618	93.6286	3618	92.8728	3618	92.4836	3618	95.5461	3618	94.4364	3618	96.0093
3617	93.6576	3617	92.8918	3617	92.4724	3617	95.5444	3617	94.4212	3617	95.9573
3616	93.7033	3616	92.9367	3616	92.5338	3616	95.6015	3616	94.5107	3616	96.0053
3615	93.7113	3615	92.8877	3615	92.5072	3615	95.5363	3615	94.451	3615	95.9268
3614	93.7191	3614	92.8987	3614	92.5432	3614	95.5425	3614	94.4316	3614	95.9804
3613	93.7124	3613	92.9461	3613	92.5782	3613	95.6222	3613	94.5132	3613	96.0948
3612	93.695	3612	92.92	3612	92.5175	3612	95.5591	3612	94.4316	3612	95.9707
3611	93.6939	3611	92.9249	3611	92.5164	3611	95.5477	3611	94.4035	3611	95.9424
3610	93.7192	3610	92.9716	3610	92.5852	3610	95.6384	3610	94.5217	3610	96.0579
3609	93.7379	3609	92.9671	3609	92.5755	3609	95.6179	3609	94.5194	3609	96.011
3608	93.6762	3608	92.9016	3608	92.4856	3608	95.5475	3608	94.4245	3608	95.9293
3607	93.6249	3607	92.8274	3607	92.3655	3607	95.4139	3607	94.2403	3607	95.7469
3606	93.6552	3606	92.8514	3606	92.3659	3606	95.3145	3606	94.1254	3606	95.6115
3605	93.7045	3605	92.8852	3605	92.3965	3605	95.2886	3605	94.1015	3605	95.5496
3604	93.7423	3604	92.8829	3604	92.3808	3604	95.2267	3604	94.0222	3604	95.4588
3603	93.7376	3603	92.8846	3603	92.3753	3603	95.1939	3603	93.9844	3603	95.446
3602	93.7079	3602	92.8996	3602	92.3744	3602	95.2239	3602	94.0361	3602	95.5045
3601	93.6708	3601	92.8799	3601	92.3592	3601	95.2401	3601	94.0707	3601	95.5459
3600	93.6709	3600	92.8735	3600	92.4003	3600	95.2838	3600	94.0994	3600	95.5864
3599	93.6847	3599	92.8966	3599	92.4437	3599	95.3303	3599	94.1564	3599	95.6294
3598	93.7113	3598	92.9063	3598	92.4436	3598	95.3211	3598	94.1608	3598	95.6219
3597	93.7144	3597	92.9285	3597	92.4547	3597	95.3515	3597	94.1816	3597	95.6589
3596	93.691	3596	92.9003	3596	92.4082	3596	95.3481	3596	94.1769	3596	95.6635
3595	93.6841	3595	92.8768	3595	92.3963	3595	95.3305	3595	94.1653	3595	95.6725
3594	93.6792	3594	92.863	3594	92.4227	3594	95.3573	3594	94.1957	3594	95.7009
3593	93.692	3593	92.8363	3593	92.3899	3593	95.2928	3593	94.0942	3593	95.5799
3592	93.7213	3592	92.8712	3592	92.4104	3592	95.2654	3592	94.0429	3592	95.5279
3591	93.713	3591	92.8787	3591	92.4168	3591	95.2605	3591	94.0331	3591	95.5204
3590	93.6705	3590	92.8408	3590	92.3951	3590	95.2538	3590	94.0324	3590	95.5297
3589	93.6157	3589	92.8292	3589	92.4032	3589	95.3543	3589	94.1971	3589	95.7022
3588	93.5862	3588	92.8316	3588	92.4553	3588	95.4682	3588	94.3446	3588	95.9117
3587	93.5864	3587	92.8411	3587	92.4554	3587	95.5246	3587	94.4057	3587	96.0203
3586	93.605	3586	92.8348	3586	92.3902	3586	95.4373	3586	94.2867	3586	95.8505
3585	93.6338	3585	92.8366	3585	92.3834	3585	95.3703	3585	94.1931	3585	95.7021
3584	93.6491	3584	92.8373	3584	92.3502	3584	95.2504	3584	94.075	3584	95.5349
3583	93.6762	3583	92.8386	3583	92.332	3583	95.1294	3583	93.9589	3583	95.4018
3582	93.6984	3582	92.829	3582	92.3374	3582	95.1179	3582	93.9196	3582	95.37
3581	93.7001	3581	92.8203	3581	92.3375	3581	95.1359	3581	93.9102	3581	95.3667
3580	93.6794	3580	92.8027	3580	92.3024	3580	95.1006	3580	93.8554	3580	95.3121
3579	93.6637	3579	92.8066	3579	92.2783	3579	95.0898	3579	93.8389	3579	95.2856
3578	93.6796	3578	92.8225	3578	92.2866	3578	95.1121	3578	93.8736	3578	95.3112
3577	93.6932	3577	92.8075	3577	92.2676	3577	95.0828	3577	93.8425	3577	95.2923
3576	93.6861	3576	92.8321	3576	92.2777	3576	95.0895	3576	93.84	3576	95.3099
3575	93.6671	3575	92.8353	3575	92.2891	3575	95.0913	3575	93.855	3575	95.3199
3574	93.6486	3574	92.8048	3574	92.2738	3574	95.0563	3574	93.823	3574	95.2789
3573	93.6407	3573	92.8038	3573	92.2617	3573	95.0429	3573	93.8135	3573	95.2716
3572	93.6652	3572	92.8234	3572	92.2625	3572	95.0583	3572	93.8309	3572	95.2985
3571	93.6815	3571	92.8196	3571	92.2722	3571	95.0955	3571	93.8677	3571	95.3445
3570	93.6562	3570	92.7883	3570	92.2687	3570	95.1168	3570	93.9035	3570	95.4022
3569	93.6079	3569	92.7646	3569	92.2817	3569	95.1806	3569	94.032	3569	95.5719
3568	93.5953	3568	92.8111	3568	92.3827	3568	95.382	3568	94.2958	3568	95.867
3567	93.5457	3567	92.8429	3567	92.4885	3567	95.6222	3567	94.5845	3567	96.194
3566	93.4702	3566	92.7433	3566	92.3692	3566	95.5267	3566	94.4622	3566	96.0586
3565	93.5388	3565	92.7521	3565	92.3487	3565	95.449	3565	94.3359	3565	95.8995
3564	93.6211	3564	92.7905	3564	92.3571	3564	95.3825	3564	94.2415	3564	95.7684
3563	93.646	3563	92.799	3563	92.3457	3563	95.2586	3563	94.0706	3563	95.5861
3562	93.6435	3562	92.8212	3562	92.3386	3562	95.1992	3562	93.9918	3562	95.5044
3561	93.6525	3561	92.8219	3561	92.3142	3561	95.1585	3561	93.9559	3561	95.4389
3560	93.6452	3560	92.7883	3560	92.2659	3560	95.0862	3560	93.8899	3560	95.3436
3559	93.6272	3559	92.7782	3559	92.2348	3559	95.0547	3559	93.8436	3559	95.3112
3558	93.6238	3558	92.7668	3558	92.2095	3558	95.0406	3558	93.793	3558	95.2711
3557	93.6202	3557	92.751	3557	92.1861	3557	94.9807	3557	93.7197	3557	95.1839
3556	93.6262	3556	92.7548	3556	92.2025	3556	94.9731	3556	93.7221	3556	95.1837
3555	93.6412	3555	92.757	3555	92.2271	3555	95.0135	3555	93.7661	3555	95.2396
3554	93.6345	3554	92.7595	3554	92.2412	3554	95.0453	3554	93.8069	3554	95.2817
3553	93.6214	3553	92.7722	3553	92.2464	3553	95.0905	3553	93.8648	3553	95.338
3552	93.6023	3552	92.7651	3552	92.2282	3552	95.0945	3552	93.8642	3552	95.3513
3551	93.5931	3551	92.7617	3551	92.2363	3551	95.0857	3551	93.8406	3551	95.335
3550	93.597	3550	92.7547	3550	92.2443	3550	95.078	3550	93.8384	3550	95.3217
3549	93.6227	3549	92.7686	3549	92.2544	3549	95.0826	3549	93.8524	3549	95.3305
3548	93.6298	3548	92.7928	3548	92.3046	3548	95.1359	3548	93.9423	3548	95.4376
3547	93.6086	3547	92.8131	3547	92.3379	3547	95.1962	3547	94.0523	3547	95.5666
3546	93.5998	3546	92.8278	3546	92.348	3546	95.272	3546	94.142	3546	95.666
3545	93.587	3545	92.7934	3545	92.3125	3545	95.2713	3545	94.0993	3545	95.6367
3544	93.6003	3544	92.7786	3544	92.293	3544	95.2163	3544	94.0187	3544	95.544
3543	93.606	3543	92.7579	3543	92.2421	3543	95.1195	3543	93.9167	3543	95.4154
3542	93.5977	3542	92.7336	3542	92.1919	3542	95.026	3542	93.7942	3542	95.2839
3541	93.6134	3541	92.7322	3541	92.1839	3541	94.9774	3541	93.7221	3541	95.1988
3540	93.6365	3540	92.75	3540	92.1716	3540	94.9525	3540	93.6823	3540	95.147
3539	93.6389	3539	92.7591	3539	92.1565	3539	94.9502	3539	93.6631	3539	95.1261
3538	93.6023	3538	92.7468	3538	92.1733	3538	94.9629	3538	93.6939	3538	95.1551
3537	93.5709	3537	92.7301	3537	92.1813	3537	94.9878	3537	93.7329	3537	95.2097
3536	93.5768	3536	92.7248	3536	92.1708	3536	94.9887	3536	93.7062	3536	95.2018
3535	93.5814	3535	92.726	3535	92.1747	3535	94.9805	3535	93.6963	3535	95.1857
3534	93.5906	3534	92.7205	3534	92.1592	3534	94.9504	3534	93.6941	3534	95.1505
3533	93.5957	3533	92.7185	3533	92.1388	3533	94.9335	3533	93.6846	3533	95.1235
3532	93.5862	3532	92.7032	3532	92.14	3532	94.9437	3532	93.6788	3532	95.1463
3531	93.5808	3531	92.6986	3531	92.1536	3531	94.9604	3531	93.6843	3531	95.1847
3530	93.5695	3530	92.7085	3530	92.1773	3530	94.9955	3530	93.7506	3530	95.2524
3529	93.5604	3529	92.7101	3529	92.1978	3529	95.0429	3529	93.8318	3529	95.3396
3528	93.5658	3528	92.7347	3528	92.2157	3528	95.104	3528	93.8863	3528	95.4182
3527	93.5524	3527	92.7395	3527	92.209	3527	95.1254	3527	93.8988	3527	95.4385
3526	93.5584	3526	92.7459	3526	92.2385	3526	95.144	3526	93.9287	3526	95.4585
3525	93.5817	3525	92.7662	3525	92.2786	3525	95.1821	3525	93.9619	3525	95.4869
3524	93.5834	3524	92.767	3524	92.2742	3524	95.1833	3524	93.9562	3524	95.4762
3523	93.5616	3523	92.7407	3523	92.2219	3523	95.1014	3523	93.8866	3523	95.3977
3522	93.5439	3522	92.7137	3522	92.1701	3522	95.0187	3522	93.7916	3522	95.2998
3521	93.5388	3521	92.6903	3521	92.137	3521	94.9698	3521	93.7178	3521	95.2096
3520	93.5495	3520	92.6747	3520	92.1125	3520	94.9243	3520	93.6583	3520	95.1354
3519	93.5555	3519	92.673	3519	92.1136	3519	94.9078	3519	93.6282	3519	95.1133
3518	93.5615	3518	92.6738	3518	92.1162	3518	94.9035	3518	93.6106	3518	95.107
3517	93.5555	3517	92.6648	3517	92.1	3517	94.8815	3517	93.5825	3517	95.0824
3516	93.5556	3516	92.6634	3516	92.0941	3516	94.8602	3516	93.5797	3516	95.0644
3515	93.5559	3515	92.6501	3515	92.084	3515	94.845	3515	93.5878	3515	95.0651
3514	93.5573	3514	92.6369	3514	92.065	3514	94.8429	3514	93.5749	3514	95.0658
3513	93.5561	3513	92.6415	3513	92.0728	3513	94.854	3513	93.5715	3513	95.0674
3512	93.5346	3512	92.6528	3512	92.0777	3512	94.8684	3512	93.601	3512	95.0857
3511	93.5305	3511	92.6635	3511	92.0836	3511	94.8973	3511	93.6595	3511	95.1411
3510	93.5221	3510	92.6551	3510	92.0913	3510	94.9269	3510	93.6903	3510	95.196
3509	93.5112	3509	92.6402	3509	92.0776	3509	94.9325	3509	93.6632	3509	95.1837
3508	93.5185	3508	92.6471	3508	92.0812	3508	94.9193	3508	93.6516	3508	95.1597
3507	93.5374	3507	92.6551	3507	92.0949	3507	94.886	3507	93.6331	3507	95.1302
3506	93.5395	3506	92.647	3506	92.0808	3506	94.8727	3506	93.6147	3506	95.1133
3505	93.5313	3505	92.6453	3505	92.0814	3505	94.9018	3505	93.6602	3505	95.1567
3504	93.5271	3504	92.6649	3504	92.1138	3504	94.9605	3504	93.7502	3504	95.2624
3503	93.5223	3503	92.6771	3503	92.1368	3503	95.005	3503	93.7988	3503	95.3398
3502	93.5189	3502	92.6739	3502	92.1238	3502	94.9895	3502	93.7684	3502	95.3295
3501	93.5283	3501	92.677	3501	92.103	3501	94.9491	3501	93.7172	3501	95.2651
3500	93.5386	3500	92.6623	3500	92.0748	3500	94.8975	3500	93.6508	3500	95.1741
3499	93.5391	3499	92.6395	3499	92.0389	3499	94.8513	3499	93.578	3499	95.094
3498	93.5363	3498	92.6375	3498	92.0414	3498	94.8371	3498	93.5528	3498	95.0777
3497	93.5128	3497	92.6189	3497	92.0333	3497	94.8189	3497	93.5597	3497	95.0702
3496	93.4926	3496	92.6066	3496	92.0245	3496	94.817	3496	93.5537	3496	95.0538
3495	93.5011	3495	92.6094	3495	92.0225	3495	94.8144	3495	93.5329	3495	95.0427
3494	93.5227	3494	92.6179	3494	92.0014	3494	94.7926	3494	93.5113	3494	95.0281
3493	93.5235	3493	92.6344	3493	91.9909	3493	94.7838	3493	93.4956	3493	95.0163
3492	93.5155	3492	92.6279	3492	91.9895	3492	94.7686	3492	93.4733	3492	94.9952
3491	93.5115	3491	92.6056	3491	91.9828	3491	94.7532	3491	93.4634	3491	94.9739
3490	93.5125	3490	92.6016	3490	91.976	3490	94.7531	3490	93.4783	3490	94.9949
3489	93.503	3489	92.6002	3489	91.9741	3489	94.763	3489	93.507	3489	95.0408
3488	93.4915	3488	92.5983	3488	91.9944	3488	94.7829	3488	93.5166	3488	95.0557
3487	93.5079	3487	92.6108	3487	92.0019	3487	94.8043	3487	93.528	3487	95.0643
3486	93.5048	3486	92.5996	3486	91.9712	3486	94.768	3486	93.5106	3486	95.04
3485	93.4861	3485	92.5777	3485	91.9485	3485	94.7237	3485	93.4811	3485	95.0002
3484	93.4829	3484	92.5698	3484	91.9461	3484	94.7317	3484	93.483	3484	94.9999
3483	93.4761	3483	92.5666	3483	91.9449	3483	94.7487	3483	93.4973	3483	95.017
3482	93.4688	3482	92.5714	3482	91.9485	3482	94.7621	3482	93.5067	3482	95.0429
3481	93.4674	3481	92.5819	3481	91.9596	3481	94.7815	3481	93.5198	3481	95.0776
3480	93.4819	3480	92.5738	3480	91.9422	3480	94.7545	3480	93.4967	3480	95.0483
3479	93.4886	3479	92.5609	3479	91.9089	3479	94.7103	3479	93.4528	3479	94.9853
3478	93.4625	3478	92.5389	3478	91.8757	3478	94.6619	3478	93.3982	3478	94.9214
3477	93.4532	3477	92.5166	3477	91.849	3477	94.6228	3477	93.3681	3477	94.8941
3476	93.4586	3476	92.5143	3476	91.8426	3476	94.6168	3476	93.3631	3476	94.8959
3475	93.4655	3475	92.5141	3475	91.8336	3475	94.6089	3475	93.3432	3475	94.8849
3474	93.468	3474	92.5231	3474	91.8299	3474	94.6045	3474	93.3315	3474	94.888
3473	93.4608	3473	92.5219	3473	91.8257	3473	94.5984	3473	93.3252	3473	94.8796
3472	93.4522	3472	92.5095	3472	91.8193	3472	94.5817	3472	93.3168	3472	94.8658
3471	93.4567	3471	92.517	3471	91.8271	3471	94.5854	3471	93.3274	3471	94.8718
3470	93.4721	3470	92.5256	3470	91.8401	3470	94.5914	3470	93.3278	3470	94.881
3469	93.4685	3469	92.5225	3469	91.8406	3469	94.5863	3469	93.3198	3469	94.8767
3468	93.4586	3468	92.5126	3468	91.833	3468	94.5814	3468	93.3268	3468	94.8813
3467	93.4586	3467	92.4948	3467	91.8227	3467	94.5708	3467	93.3236	3467	94.8793
3466	93.4622	3466	92.4866	3466	91.8103	3466	94.575	3466	93.3168	3466	94.8706
3465	93.4503	3465	92.4875	3465	91.7946	3465	94.5765	3465	93.3058	3465	94.87
3464	93.4308	3464	92.488	3464	91.779	3464	94.5608	3464	93.2955	3464	94.8697
3463	93.4288	3463	92.4956	3463	91.7691	3463	94.5637	3463	93.306	3463	94.8697
3462	93.4286	3462	92.4953	3462	91.7747	3462	94.5814	3462	93.323	3462	94.8811
3461	93.4258	3461	92.4877	3461	91.7852	3461	94.5804	3461	93.3226	3461	94.8934
3460	93.4334	3460	92.4749	3460	91.7804	3460	94.5491	3460	93.304	3460	94.8668
3459	93.4162	3459	92.4686	3459	91.7563	3459	94.5218	3459	93.2674	3459	94.8248
3458	93.4186	3458	92.4746	3458	91.7469	3458	94.5264	3458	93.2478	3458	94.8054
3457	93.4353	3457	92.4724	3457	91.7592	3457	94.5171	3457	93.2474	3457	94.8128
3456	93.4198	3456	92.4605	3456	91.7359	3456	94.4891	3456	93.2429	3456	94.8025
3455	93.4155	3455	92.4593	3455	91.7094	3455	94.486	3455	93.2327	3455	94.7866
3454	93.4219	3454	92.4631	3454	91.7149	3454	94.5054	3454	93.2185	3454	94.7962
3453	93.4273	3453	92.4651	3453	91.7388	3453	94.5182	3453	93.2344	3453	94.8002
3452	93.4233	3452	92.4689	3452	91.7524	3452	94.5185	3452	93.2503	3452	94.7879
3451	93.4241	3451	92.4698	3451	91.7539	3451	94.5203	3451	93.2481	3451	94.7945
3450	93.4141	3450	92.4668	3450	91.7642	3450	94.5359	3450	93.2547	3450	94.8242
3449	93.4057	3449	92.463	3449	91.7721	3449	94.5749	3449	93.2929	3449	94.8694
3448	93.416	3448	92.4631	3448	91.7797	3448	94.6173	3448	93.3669	3448	94.9403
3447	93.4131	3447	92.4618	3447	91.7861	3447	94.6192	3447	93.3913	3447	94.9744
3446	93.4122	3446	92.4723	3446	91.8117	3446	94.6333	3446	93.3931	3446	94.986
3445	93.4157	3445	92.4682	3445	91.8147	3445	94.6435	3445	93.3835	3445	94.943
3444	93.4119	3444	92.4587	3444	91.7972	3444	94.6303	3444	93.3511	3444	94.9017
3443	93.4085	3443	92.4597	3443	91.7897	3443	94.6134	3443	93.3351	3443	94.9085
3442	93.4055	3442	92.4587	3442	91.7796	3442	94.5885	3442	93.3137	3442	94.891
3441	93.407	3441	92.4643	3441	91.7833	3441	94.6012	3441	93.3143	3441	94.8755
3440	93.4122	3440	92.4735	3440	91.7864	3440	94.6144	3440	93.3029	3440	94.8598
3439	93.4217	3439	92.4857	3439	91.7967	3439	94.61	3439	93.2949	3439	94.858
3438	93.4317	3438	92.5025	3438	91.8138	3438	94.61	3438	93.3122	3438	94.865
3437	93.4304	3437	92.5091	3437	91.8274	3437	94.6113	3437	93.3225	3437	94.8668
3436	93.4092	3436	92.4884	3436	91.8234	3436	94.6102	3436	93.3173	3436	94.8614
3435	93.4024	3435	92.4911	3435	91.8254	3435	94.6285	3435	93.3069	3435	94.8721
3434	93.4148	3434	92.4974	3434	91.8293	3434	94.6457	3434	93.3051	3434	94.8668
3433	93.4122	3433	92.4836	3433	91.8266	3433	94.6461	3433	93.3133	3433	94.8569
3432	93.4054	3432	92.4748	3432	91.8266	3432	94.6443	3432	93.3286	3432	94.8739
3431	93.4012	3431	92.4807	3431	91.8267	3431	94.6499	3431	93.3388	3431	94.891
3430	93.4141	3430	92.4892	3430	91.8341	3430	94.6654	3430	93.3454	3430	94.8951
3429	93.4194	3429	92.488	3429	91.8453	3429	94.6647	3429	93.3526	3429	94.8955
3428	93.4059	3428	92.4911	3428	91.8433	3428	94.651	3428	93.3443	3428	94.8941
3427	93.407	3427	92.4965	3427	91.8499	3427	94.6581	3427	93.3432	3427	94.8999
3426	93.4059	3426	92.4856	3426	91.8468	3426	94.663	3426	93.3436	3426	94.897
3425	93.4097	3425	92.4934	3425	91.8518	3425	94.6853	3425	93.3532	3425	94.9095
3424	93.4133	3424	92.4992	3424	91.8728	3424	94.707	3424	93.3667	3424	94.9234
3423	93.4086	3423	92.491	3423	91.8803	3423	94.7213	3423	93.3876	3423	94.9457
3422	93.4083	3422	92.4924	3422	91.8854	3422	94.7423	3422	93.4421	3422	94.9765
3421	93.4055	3421	92.4966	3421	91.9007	3421	94.7612	3421	93.4742	3421	94.9985
3420	93.4032	3420	92.4857	3420	91.9108	3420	94.7725	3420	93.4557	3420	95.0044
3419	93.395	3419	92.4812	3419	91.9034	3419	94.7709	3419	93.4285	3419	94.9976
3418	93.3894	3418	92.4816	3418	91.8821	3418	94.7493	3418	93.3938	3418	94.9565
3417	93.3943	3417	92.489	3417	91.8726	3417	94.7345	3417	93.3843	3417	94.9189
3416	93.4079	3416	92.4985	3416	91.8863	3416	94.7359	3416	93.3979	3416	94.9115
3415	93.4197	3415	92.4975	3415	91.8904	3415	94.7327	3415	93.3939	3415	94.9162
3414	93.4103	3414	92.4951	3414	91.8825	3414	94.7244	3414	93.3744	3414	94.9111
3413	93.4025	3413	92.5043	3413	91.8851	3413	94.7214	3413	93.3701	3413	94.9063
3412	93.3937	3412	92.4959	3412	91.8726	3412	94.7012	3412	93.3692	3412	94.896
3411	93.3798	3411	92.4842	3411	91.8664	3411	94.7124	3411	93.3711	3411	94.8894
3410	93.3917	3410	92.4922	3410	91.8901	3410	94.7375	3410	93.3723	3410	94.9046
3409	93.4194	3409	92.5075	3409	91.9032	3409	94.735	3409	93.3756	3409	94.9285
3408	93.4185	3408	92.5138	3408	91.8893	3408	94.7353	3408	93.3799	3408	94.9295
3407	93.3869	3407	92.5044	3407	91.8691	3407	94.7252	3407	93.3658	3407	94.9171
3406	93.3604	3406	92.4855	3406	91.8568	3406	94.7096	3406	93.3576	3406	94.9075
3405	93.367	3405	92.4755	3405	91.8612	3405	94.7168	3405	93.3643	3405	94.8985
3404	93.3919	3404	92.4718	3404	91.8842	3404	94.7302	3404	93.3835	3404	94.9104
3403	93.399	3403	92.4596	3403	91.8891	3403	94.7371	3403	93.3973	3403	94.924
3402	93.3933	3402	92.4656	3402	91.8675	3402	94.7503	3402	93.399	3402	94.9222
3401	93.3818	3401	92.4845	3401	91.8707	3401	94.7472	3401	93.3901	3401	94.9256
3400	93.3695	3400	92.4829	3400	91.8818	3400	94.7306	3400	93.3774	3400	94.9241
3399	93.3711	3399	92.4656	3399	91.876	3399	94.7394	3399	93.3853	3399	94.9296
3398	93.3625	3398	92.4577	3398	91.8562	3398	94.7341	3398	93.3951	3398	94.941
3397	93.3585	3397	92.4601	3397	91.8406	3397	94.7178	3397	93.3872	3397	94.9289
3396	93.3696	3396	92.4777	3396	91.8607	3396	94.7342	3396	93.399	3396	94.9422
3395	93.3803	3395	92.4782	3395	91.874	3395	94.75	3395	93.4103	3395	94.9565
3394	93.3659	3394	92.4617	3394	91.8838	3394	94.7562	3394	93.4151	3394	94.9529
3393	93.3571	3393	92.4502	3393	91.8699	3393	94.747	3393	93.4161	3393	94.939
3392	93.364	3392	92.4544	3392	91.851	3392	94.7481	3392	93.4032	3392	94.937
3391	93.3604	3391	92.4681	3391	91.8499	3391	94.7529	3391	93.3826	3391	94.9318
3390	93.362	3390	92.4637	3390	91.8476	3390	94.7294	3390	93.3542	3390	94.9007
3389	93.3565	3389	92.4413	3389	91.8438	3389	94.709	3389	93.3255	3389	94.8824
3388	93.3584	3388	92.4432	3388	91.8283	3388	94.6993	3388	93.3179	3388	94.8865
3387	93.3574	3387	92.4575	3387	91.8246	3387	94.696	3387	93.3389	3387	94.8876
3386	93.3563	3386	92.4558	3386	91.8358	3386	94.7205	3386	93.358	3386	94.8884
3385	93.3554	3385	92.4474	3385	91.8309	3385	94.7324	3385	93.358	3385	94.9032
3384	93.3584	3384	92.4487	3384	91.8236	3384	94.7194	3384	93.3447	3384	94.9186
3383	93.3575	3383	92.4566	3383	91.8222	3383	94.7189	3383	93.3457	3383	94.9206
3382	93.3562	3382	92.4385	3382	91.8172	3382	94.7164	3382	93.3443	3382	94.9021
3381	93.3444	3381	92.4233	3381	91.8167	3381	94.706	3381	93.317	3381	94.8821
3380	93.3432	3380	92.4337	3380	91.8225	3380	94.7128	3380	93.3149	3380	94.8711
3379	93.337	3379	92.4356	3379	91.8318	3379	94.7145	3379	93.3304	3379	94.877
3378	93.3263	3378	92.4286	3378	91.836	3378	94.7135	3378	93.3307	3378	94.8899
3377	93.3435	3377	92.4261	3377	91.8364	3377	94.7224	3377	93.3355	3377	94.8924
3376	93.3567	3376	92.4312	3376	91.8269	3376	94.7191	3376	93.3391	3376	94.8859
3375	93.3464	3375	92.4377	3375	91.8231	3375	94.7186	3375	93.3311	3375	94.8899
3374	93.3285	3374	92.4248	3374	91.814	3374	94.7054	3374	93.3127	3374	94.8871
3373	93.3373	3373	92.4263	3373	91.8012	3373	94.6937	3373	93.3123	3373	94.8866
3372	93.3604	3372	92.4515	3372	91.8132	3372	94.718	3372	93.332	3372	94.9028
3371	93.3519	3371	92.4566	3371	91.8261	3371	94.7373	3371	93.3307	3371	94.9036
3370	93.3322	3370	92.4432	3370	91.8246	3370	94.7249	3370	93.3281	3370	94.883
3369	93.325	3369	92.4428	3369	91.8217	3369	94.7218	3369	93.3446	3369	94.8766
3368	93.3301	3368	92.4466	3368	91.8221	3368	94.7303	3368	93.3532	3368	94.8832
3367	93.3318	3367	92.4309	3367	91.8212	3367	94.728	3367	93.3538	3367	94.8949
3366	93.3289	3366	92.4171	3366	91.8078	3366	94.7201	3366	93.3527	3366	94.9091
3365	93.3279	3365	92.4185	3365	91.8006	3365	94.7202	3365	93.3479	3365	94.9184
3364	93.3169	3364	92.4229	3364	91.797	3364	94.7231	3364	93.339	3364	94.9067
3363	93.3125	3363	92.4213	3363	91.7922	3363	94.7247	3363	93.3461	3363	94.911
3362	93.3121	3362	92.4145	3362	91.7944	3362	94.7192	3362	93.354	3362	94.9066
3361	93.3036	3361	92.3975	3361	91.8003	3361	94.7239	3361	93.3519	3361	94.8839
3360	93.3	3360	92.3927	3360	91.7942	3360	94.7157	3360	93.3385	3360	94.8798
3359	93.3112	3359	92.4021	3359	91.7844	3359	94.6998	3359	93.3206	3359	94.8715
3358	93.3247	3358	92.4223	3358	91.7898	3358	94.7082	3358	93.3235	3358	94.8799
3357	93.3292	3357	92.4287	3357	91.7974	3357	94.7194	3357	93.3388	3357	94.8985
3356	93.3119	3356	92.3995	3356	91.7804	3356	94.703	3356	93.3335	3356	94.8772
3355	93.3021	3355	92.3844	3355	91.7635	3355	94.6796	3355	93.3183	3355	94.8651
3354	93.3056	3354	92.3838	3354	91.774	3354	94.6788	3354	93.3114	3354	94.869
3353	93.3077	3353	92.3843	3353	91.7913	3353	94.6887	3353	93.3084	3353	94.86
3352	93.3169	3352	92.4072	3352	91.7935	3352	94.7009	3352	93.3099	3352	94.864
3351	93.316	3351	92.4126	3351	91.7861	3351	94.7036	3351	93.2943	3351	94.8517
3350	93.3148	3350	92.4064	3350	91.7814	3350	94.6984	3350	93.2978	3350	94.845
3349	93.3103	3349	92.4079	3349	91.7729	3349	94.6946	3349	93.3144	3349	94.853
3348	93.297	3348	92.3929	3348	91.7568	3348	94.6785	3348	93.2924	3348	94.8415
3347	93.29	3347	92.3715	3347	91.7487	3347	94.6573	3347	93.2646	3347	94.8332
3346	93.2888	3346	92.3752	3346	91.7556	3346	94.6633	3346	93.2698	3346	94.8439
3345	93.2916	3345	92.386	3345	91.761	3345	94.6837	3345	93.2869	3345	94.8427
3344	93.2965	3344	92.3866	3344	91.761	3344	94.6797	3344	93.2891	3344	94.8441
3343	93.3019	3343	92.3991	3343	91.7562	3343	94.6741	3343	93.2844	3343	94.8616
3342	93.3039	3342	92.4007	3342	91.761	3342	94.6837	3342	93.2872	3342	94.863
3341	93.3	3341	92.3862	3341	91.7656	3341	94.6826	3341	93.291	3341	94.8331
3340	93.2907	3340	92.3847	3340	91.7627	3340	94.678	3340	93.2814	3340	94.8198
3339	93.2933	3339	92.3849	3339	91.7703	3339	94.6923	3339	93.2916	3339	94.8461
3338	93.3041	3338	92.3808	3338	91.7695	3338	94.7067	3338	93.3103	3338	94.8597
3337	93.2994	3337	92.3816	3337	91.7563	3337	94.6984	3337	93.3092	3337	94.8607
3336	93.2786	3336	92.3737	3336	91.7368	3336	94.6889	3336	93.2866	3336	94.8619
3335	93.2736	3335	92.3616	3335	91.7343	3335	94.6878	3335	93.2825	3335	94.8695
3334	93.2713	3334	92.3559	3334	91.741	3334	94.6762	3334	93.2788	3334	94.8636
3333	93.255	3333	92.3541	3333	91.739	3333	94.6711	3333	93.2665	3333	94.8419
3332	93.2647	3332	92.3592	3332	91.7362	3332	94.6667	3332	93.2619	3332	94.8229
3331	93.2754	3331	92.3508	3331	91.7202	3331	94.6563	3331	93.2456	3331	94.8081
3330	93.2728	3330	92.3436	3330	91.7036	3330	94.6663	3330	93.2352	3330	94.7983
3329	93.279	3329	92.3485	3329	91.7057	3329	94.6821	3329	93.2455	3329	94.8101
3328	93.2863	3328	92.3514	3328	91.7106	3328	94.6829	3328	93.2587	3328	94.8281
3327	93.2862	3327	92.3647	3327	91.7161	3327	94.6836	3327	93.2652	3327	94.8444
3326	93.2766	3326	92.3648	3326	91.7258	3326	94.6858	3326	93.2732	3326	94.8434
3325	93.2641	3325	92.3558	3325	91.7331	3325	94.6847	3325	93.2708	3325	94.8324
3324	93.2623	3324	92.3459	3324	91.7178	3324	94.6728	3324	93.2608	3324	94.8256
3323	93.2574	3323	92.3397	3323	91.6994	3323	94.6632	3323	93.2419	3323	94.8176
3322	93.2463	3322	92.3353	3322	91.6958	3322	94.6659	3322	93.2325	3322	94.8146
3321	93.2497	3321	92.3419	3321	91.7092	3321	94.6625	3321	93.2404	3321	94.8268
3320	93.2575	3320	92.3499	3320	91.7188	3320	94.6556	3320	93.2422	3320	94.8316
3319	93.262	3319	92.3312	3319	91.7059	3319	94.6512	3319	93.2409	3319	94.8273
3318	93.2568	3318	92.3209	3318	91.6915	3318	94.6392	3318	93.2372	3318	94.8143
3317	93.2512	3317	92.3338	3317	91.696	3317	94.6395	3317	93.2365	3317	94.8071
3316	93.2392	3316	92.331	3316	91.6804	3316	94.6387	3316	93.2225	3316	94.7961
3315	93.2423	3315	92.3281	3315	91.6729	3315	94.6479	3315	93.2337	3315	94.805
3314	93.2624	3314	92.3411	3314	91.6958	3314	94.6645	3314	93.2623	3314	94.8336
3313	93.2635	3313	92.339	3313	91.7036	3313	94.6488	3313	93.2533	3313	94.8349
3312	93.2485	3312	92.3298	3312	91.6986	3312	94.6507	3312	93.248	3312	94.8333
3311	93.2534	3311	92.3514	3311	91.7027	3311	94.6732	3311	93.2684	3311	94.8458
3310	93.2481	3310	92.3525	3310	91.6954	3310	94.6689	3310	93.2644	3310	94.8445
3309	93.2348	3309	92.3398	3309	91.6914	3309	94.6591	3309	93.258	3309	94.8402
3308	93.2388	3308	92.3441	3308	91.6991	3308	94.6601	3308	93.2565	3308	94.8331
3307	93.2441	3307	92.354	3307	91.7061	3307	94.6592	3307	93.2485	3307	94.8178
3306	93.2444	3306	92.3431	3306	91.7027	3306	94.6476	3306	93.2352	3306	94.8036
3305	93.2526	3305	92.3278	3305	91.6909	3305	94.6472	3305	93.2394	3305	94.8017
3304	93.2597	3304	92.3264	3304	91.6832	3304	94.6567	3304	93.243	3304	94.8028
3303	93.2533	3303	92.3283	3303	91.6748	3303	94.6545	3303	93.2344	3303	94.8038
3302	93.2414	3302	92.3209	3302	91.6602	3302	94.6335	3302	93.2133	3302	94.7886
3301	93.2382	3301	92.3162	3301	91.6568	3301	94.6278	3301	93.2094	3301	94.7877
3300	93.2298	3300	92.318	3300	91.656	3300	94.6308	3300	93.2105	3300	94.7961
3299	93.2231	3299	92.3078	3299	91.6564	3299	94.6375	3299	93.2038	3299	94.7852
3298	93.2358	3298	92.3012	3298	91.6569	3298	94.643	3298	93.2063	3298	94.7714
3297	93.2473	3297	92.3071	3297	91.6672	3297	94.6433	3297	93.2193	3297	94.7859
3296	93.2428	3296	92.3128	3296	91.6627	3296	94.6459	3296	93.2278	3296	94.8015
3295	93.2328	3295	92.3141	3295	91.6473	3295	94.6449	3295	93.2247	3295	94.7909
3294	93.246	3294	92.3128	3294	91.6613	3294	94.6494	3294	93.2347	3294	94.7926
3293	93.2541	3293	92.3192	3293	91.6788	3293	94.6617	3293	93.2469	3293	94.8103
3292	93.2495	3292	92.3105	3292	91.672	3292	94.6643	3292	93.2391	3292	94.817
3291	93.2367	3291	92.2865	3291	91.6551	3291	94.651	3291	93.2225	3291	94.8101
3290	93.1999	3290	92.2749	3290	91.6422	3290	94.6296	3290	93.2032	3290	94.7917
3289	93.1926	3289	92.2903	3289	91.6483	3289	94.6313	3289	93.2029	3289	94.7932
3288	93.2235	3288	92.3071	3288	91.6552	3288	94.6542	3288	93.2209	3288	94.8022
3287	93.2314	3287	92.2972	3287	91.6472	3287	94.6547	3287	93.226	3287	94.7861
3286	93.2186	3286	92.2764	3286	91.6376	3286	94.633	3286	93.2139	3286	94.769
3285	93.2156	3285	92.275	3285	91.635	3285	94.6374	3285	93.196	3285	94.7669
3284	93.2092	3284	92.2783	3284	91.6241	3284	94.6377	3284	93.1845	3284	94.7675
3283	93.2128	3283	92.2945	3283	91.6291	3283	94.6297	3283	93.1958	3283	94.7649
3282	93.2176	3282	92.3011	3282	91.6376	3282	94.6311	3282	93.1945	3282	94.7671
3281	93.2029	3281	92.282	3281	91.6225	3281	94.6333	3281	93.1803	3281	94.7631
3280	93.2043	3280	92.2749	3280	91.6052	3280	94.6282	3280	93.1758	3280	94.7556
3279	93.1999	3279	92.2718	3279	91.5984	3279	94.6193	3279	93.1808	3279	94.7505
3278	93.1888	3278	92.2738	3278	91.6084	3278	94.6186	3278	93.1988	3278	94.767
3277	93.1914	3277	92.2765	3277	91.6233	3277	94.6325	3277	93.2087	3277	94.7866
3276	93.2021	3276	92.2838	3276	91.6276	3276	94.6402	3276	93.2143	3276	94.794
3275	93.2073	3275	92.306	3275	91.6452	3275	94.6663	3275	93.2454	3275	94.828
3274	93.2049	3274	92.2983	3274	91.6392	3274	94.6743	3274	93.2473	3274	94.8291
3273	93.2081	3273	92.2925	3273	91.6271	3273	94.6585	3273	93.2328	3273	94.8123
3272	93.2099	3272	92.3033	3272	91.6392	3272	94.6426	3272	93.2273	3272	94.8023
3271	93.1999	3271	92.2898	3271	91.6357	3271	94.6242	3271	93.1957	3271	94.7724
3270	93.1876	3270	92.2755	3270	91.6185	3270	94.6165	3270	93.1754	3270	94.7656
3269	93.1797	3269	92.2705	3269	91.603	3269	94.6215	3269	93.1762	3269	94.7657
3268	93.18	3268	92.2497	3268	91.5815	3268	94.61	3268	93.1549	3268	94.746
3267	93.1955	3267	92.2421	3267	91.5833	3267	94.6043	3267	93.1415	3267	94.7417
3266	93.2088	3266	92.2564	3266	91.5954	3266	94.6163	3266	93.1545	3266	94.7545
3265	93.2054	3265	92.2619	3265	91.5921	3265	94.6244	3265	93.1659	3265	94.748
3264	93.1872	3264	92.2667	3264	91.5909	3264	94.6159	3264	93.1656	3264	94.7446
3263	93.1835	3263	92.2638	3263	91.596	3263	94.6046	3263	93.1571	3263	94.7501
3262	93.1844	3262	92.249	3262	91.5933	3262	94.6035	3262	93.1429	3262	94.7482
3261	93.1817	3261	92.2476	3261	91.5856	3261	94.6044	3261	93.1504	3261	94.757
3260	93.1819	3260	92.2541	3260	91.5821	3260	94.6103	3260	93.1709	3260	94.7711
3259	93.1786	3259	92.2507	3259	91.5947	3259	94.6121	3259	93.1765	3259	94.7703
3258	93.1802	3258	92.2401	3258	91.5912	3258	94.6039	3258	93.1739	3258	94.767
3257	93.1836	3257	92.2402	3257	91.58	3257	94.606	3257	93.173	3257	94.7581
3256	93.1704	3256	92.2395	3256	91.5741	3256	94.6147	3256	93.1729	3256	94.7441
3255	93.1558	3255	92.2302	3255	91.5628	3255	94.6102	3255	93.1702	3255	94.7506
3254	93.1532	3254	92.2357	3254	91.5631	3254	94.5995	3254	93.1649	3254	94.7623
3253	93.1516	3253	92.2313	3253	91.5682	3253	94.5995	3253	93.1509	3253	94.7512
3252	93.1489	3252	92.2259	3252	91.566	3252	94.6025	3252	93.135	3252	94.7345
3251	93.1509	3251	92.2319	3251	91.5528	3251	94.5959	3251	93.1273	3251	94.7245
3250	93.1672	3250	92.2449	3250	91.5528	3250	94.5926	3250	93.1307	3250	94.727
3249	93.1749	3249	92.2488	3249	91.5686	3249	94.6096	3249	93.1389	3249	94.7428
3248	93.1708	3248	92.2464	3248	91.5778	3248	94.6065	3248	93.142	3248	94.7502
3247	93.1678	3247	92.2458	3247	91.5713	3247	94.5983	3247	93.1481	3247	94.7438
3246	93.1604	3246	92.2329	3246	91.5626	3246	94.6171	3246	93.1625	3246	94.7475
3245	93.15	3245	92.2271	3245	91.5577	3245	94.6183	3245	93.1617	3245	94.7497
3244	93.1505	3244	92.2323	3244	91.5517	3244	94.6034	3244	93.1591	3244	94.7531
3243	93.1622	3243	92.2349	3243	91.5564	3243	94.6051	3243	93.1581	3243	94.7527
3242	93.1594	3242	92.2115	3242	91.5523	3242	94.6004	3242	93.1375	3242	94.7316
3241	93.148	3241	92.2031	3241	91.5442	3241	94.5946	3241	93.1267	3241	94.7327
3240	93.1514	3240	92.1973	3240	91.5447	3240	94.5953	3240	93.1255	3240	94.7352
3239	93.1598	3239	92.1954	3239	91.547	3239	94.5979	3239	93.1266	3239	94.7404
3238	93.1504	3238	92.2026	3238	91.5425	3238	94.5927	3238	93.129	3238	94.7425
3237	93.1507	3237	92.2089	3237	91.5514	3237	94.5845	3237	93.1345	3237	94.7303
3236	93.1574	3236	92.2129	3236	91.5448	3236	94.5778	3236	93.1278	3236	94.7238
3235	93.1608	3235	92.2251	3235	91.5408	3235	94.5945	3235	93.1268	3235	94.7382
3234	93.167	3234	92.2219	3234	91.5576	3234	94.6173	3234	93.1409	3234	94.746
3233	93.1608	3233	92.2078	3233	91.5531	3233	94.5939	3233	93.1344	3233	94.7334
3232	93.1385	3232	92.2044	3232	91.5227	3232	94.5563	3232	93.1182	3232	94.7136
3231	93.1217	3231	92.1916	3231	91.5009	3231	94.5616	3231	93.117	3231	94.7041
3230	93.1186	3230	92.171	3230	91.5013	3230	94.5769	3230	93.1091	3230	94.7018
3229	93.1254	3229	92.1757	3229	91.5203	3229	94.5859	3229	93.1131	3229	94.7084
3228	93.122	3228	92.1931	3228	91.5244	3228	94.5823	3228	93.1148	3228	94.7065
3227	93.1168	3227	92.1856	3227	91.5016	3227	94.5723	3227	93.1055	3227	94.7022
3226	93.126	3226	92.1753	3226	91.4907	3226	94.578	3226	93.1091	3226	94.7047
3225	93.1344	3225	92.1897	3225	91.5016	3225	94.5748	3225	93.1093	3225	94.7092
3224	93.1233	3224	92.1877	3224	91.5043	3224	94.5571	3224	93.0889	3224	94.7121
3223	93.1169	3223	92.1828	3223	91.5045	3223	94.5514	3223	93.0881	3223	94.7077
3222	93.133	3222	92.1944	3222	91.5222	3222	94.5674	3222	93.1023	3222	94.7128
3221	93.1484	3221	92.198	3221	91.5272	3221	94.5812	3221	93.1028	3221	94.7305
3220	93.1292	3220	92.1899	3220	91.5126	3220	94.5826	3220	93.101	3220	94.7395
3219	93.1046	3219	92.1813	3219	91.503	3219	94.5828	3219	93.1048	3219	94.729
3218	93.1099	3218	92.1723	3218	91.4994	3218	94.5848	3218	93.1079	3218	94.7106
3217	93.1096	3217	92.1528	3217	91.4795	3217	94.5577	3217	93.0983	3217	94.6959
3216	93.104	3216	92.1537	3216	91.4766	3216	94.5415	3216	93.0965	3216	94.7064
3215	93.1097	3215	92.1697	3215	91.4828	3215	94.5527	3215	93.1069	3215	94.7167
3214	93.1275	3214	92.1857	3214	91.4842	3214	94.5677	3214	93.1007	3214	94.7185
3213	93.1177	3213	92.1811	3213	91.489	3213	94.5705	3213	93.0917	3213	94.7278
3212	93.0984	3212	92.1631	3212	91.489	3212	94.5633	3212	93.0788	3212	94.7169
3211	93.0952	3211	92.1577	3211	91.4853	3211	94.5635	3211	93.0597	3211	94.6978
3210	93.0878	3210	92.1535	3210	91.463	3210	94.5543	3210	93.0485	3210	94.6796
3209	93.08	3209	92.1516	3209	91.4511	3209	94.5464	3209	93.0619	3209	94.6787
3208	93.0865	3208	92.15	3208	91.4674	3208	94.5439	3208	93.0723	3208	94.686
3207	93.0964	3207	92.1526	3207	91.4651	3207	94.5342	3207	93.0608	3207	94.6826
3206	93.0897	3206	92.162	3206	91.4509	3206	94.5277	3206	93.054	3206	94.666
3205	93.0687	3205	92.1506	3205	91.4428	3205	94.5268	3205	93.0398	3205	94.6562
3204	93.06	3204	92.1441	3204	91.455	3204	94.5324	3204	93.0378	3204	94.6737
3203	93.0797	3203	92.1488	3203	91.4679	3203	94.5358	3203	93.0375	3203	94.6888
3202	93.1009	3202	92.1518	3202	91.4624	3202	94.5308	3202	93.0329	3202	94.688
3201	93.095	3201	92.1515	3201	91.458	3201	94.5311	3201	93.0423	3201	94.681
3200	93.0781	3200	92.1423	3200	91.4486	3200	94.5298	3200	93.0566	3200	94.6709
3199	93.0704	3199	92.137	3199	91.443	3199	94.5289	3199	93.0722	3199	94.6645
3198	93.0696	3198	92.127	3198	91.4371	3198	94.5309	3198	93.0625	3198	94.6676
3197	93.058	3197	92.1113	3197	91.4388	3197	94.5292	3197	93.042	3197	94.6748
3196	93.0607	3196	92.1056	3196	91.4398	3196	94.5154	3196	93.0424	3196	94.6697
3195	93.0636	3195	92.1055	3195	91.4284	3195	94.4958	3195	93.0395	3195	94.6466
3194	93.047	3194	92.1001	3194	91.4164	3194	94.4952	3194	93.0154	3194	94.6223
3193	93.0545	3193	92.1147	3193	91.424	3193	94.5144	3193	93.0152	3193	94.64
3192	93.0626	3192	92.1155	3192	91.4346	3192	94.5138	3192	93.0117	3192	94.6604
3191	93.0562	3191	92.1101	3191	91.4373	3191	94.5085	3191	93.0009	3191	94.6515
3190	93.0605	3190	92.1179	3190	91.4363	3190	94.5205	3190	93.0076	3190	94.6417
3189	93.0643	3189	92.1081	3189	91.422	3189	94.4981	3189	92.9967	3189	94.6294
3188	93.0551	3188	92.1182	3188	91.4125	3188	94.4779	3188	93.0024	3188	94.6263
3187	93.0421	3187	92.1297	3187	91.4129	3187	94.4893	3187	93.0181	3187	94.6348
3186	93.0393	3186	92.1119	3186	91.4095	3186	94.5014	3186	93.0118	3186	94.6373
3185	93.0442	3185	92.1021	3185	91.4075	3185	94.4971	3185	93.0093	3185	94.6409
3184	93.0428	3184	92.0987	3184	91.4024	3184	94.495	3184	93.0059	3184	94.6402
3183	93.0382	3183	92.0995	3183	91.4005	3183	94.4952	3183	92.9949	3183	94.6243
3182	93.0429	3182	92.0969	3182	91.3958	3182	94.4926	3182	92.9981	3182	94.6196
3181	93.0487	3181	92.0971	3181	91.3922	3181	94.4853	3181	93.0055	3181	94.6393
3180	93.0406	3180	92.1017	3180	91.402	3180	94.4889	3180	93.0092	3180	94.658
3179	93.0393	3179	92.0912	3179	91.3981	3179	94.5065	3179	93.023	3179	94.6431
3178	93.0401	3178	92.0883	3178	91.3888	3178	94.5086	3178	93.0227	3178	94.6277
3177	93.0294	3177	92.092	3177	91.3903	3177	94.4951	3177	93.0084	3177	94.643
3176	93.0213	3176	92.0648	3176	91.3796	3176	94.4602	3176	92.9786	3176	94.6234
3175	93.0231	3175	92.0525	3175	91.373	3175	94.4486	3175	92.9549	3175	94.6096
3174	93.0401	3174	92.0758	3174	91.3839	3174	94.4627	3174	92.9773	3174	94.624
3173	93.0399	3173	92.0873	3173	91.3801	3173	94.4584	3173	92.9796	3173	94.6225
3172	93.0179	3172	92.0716	3172	91.3661	3172	94.4543	3172	92.9621	3172	94.611
3171	93.0228	3171	92.0532	3171	91.3697	3171	94.4724	3171	92.9679	3171	94.6211
3170	93.035	3170	92.044	3170	91.3594	3170	94.4697	3170	92.9604	3170	94.6223
3169	93.0302	3169	92.0464	3169	91.3551	3169	94.45	3169	92.9464	3169	94.6129
3168	93.0194	3168	92.0513	3168	91.3532	3168	94.4468	3168	92.9507	3168	94.6003
3167	93.0185	3167	92.0639	3167	91.3549	3167	94.4654	3167	92.9661	3167	94.5993
3166	93.0287	3166	92.0715	3166	91.3738	3166	94.4802	3166	92.9767	3166	94.6124
3165	93.0169	3165	92.0514	3165	91.3735	3165	94.4476	3165	92.951	3165	94.6051
3164	93.0086	3164	92.0427	3164	91.3473	3164	94.4322	3164	92.9285	3164	94.5939
3163	93.0141	3163	92.0491	3163	91.3308	3163	94.447	3163	92.94	3163	94.5958
3162	93.0162	3162	92.0568	3162	91.3336	3162	94.456	3162	92.9568	3162	94.6023
3161	93.0108	3161	92.0548	3161	91.3422	3161	94.4546	3161	92.9531	3161	94.6032
3160	93.0038	3160	92.0431	3160	91.3425	3160	94.4475	3160	92.9386	3160	94.5911
3159	92.9986	3159	92.0349	3159	91.333	3159	94.4435	3159	92.939	3159	94.5824
3158	92.9984	3158	92.0303	3158	91.3311	3158	94.434	3158	92.9409	3158	94.5801
3157	93.0109	3157	92.0335	3157	91.3475	3157	94.4367	3157	92.942	3157	94.5875
3156	93.025	3156	92.0437	3156	91.3606	3156	94.4472	3156	92.9498	3156	94.5997
3155	93.0137	3155	92.0442	3155	91.3476	3155	94.4358	3155	92.9376	3155	94.5915
3154	93.0065	3154	92.0372	3154	91.3429	3154	94.4269	3154	92.9292	3154	94.5883
3153	92.9945	3153	92.0275	3153	91.3452	3153	94.4284	3153	92.9291	3153	94.5921
3152	92.9841	3152	92.0221	3152	91.3302	3152	94.4304	3152	92.9163	3152	94.5875
3151	92.9889	3151	92.0155	3151	91.3183	3151	94.4235	3151	92.9088	3151	94.5799
3150	92.9824	3150	92.0149	3150	91.3103	3150	94.4189	3150	92.9089	3150	94.578
3149	92.9789	3149	92.0112	3149	91.3066	3149	94.4172	3149	92.9006	3149	94.5699
3148	92.9855	3148	92.0104	3148	91.307	3148	94.4217	3148	92.9022	3148	94.5687
3147	92.9879	3147	92.0229	3147	91.303	3147	94.4207	3147	92.9101	3147	94.5714
3146	92.9866	3146	92.0213	3146	91.3056	3146	94.417	3146	92.9097	3146	94.5694
3145	92.9778	3145	91.9969	3145	91.3	3145	94.4019	3145	92.9002	3145	94.5611
3144	92.9562	3144	91.9834	3144	91.2811	3144	94.3969	3144	92.8848	3144	94.5569
3143	92.9616	3143	91.9907	3143	91.2872	3143	94.4112	3143	92.8838	3143	94.5735
3142	92.98	3142	91.9889	3142	91.2973	3142	94.4094	3142	92.8903	3142	94.5731
3141	92.9774	3141	91.9933	3141	91.2913	3141	94.3987	3141	92.8947	3141	94.5659
3140	92.9678	3140	92.0086	3140	91.2882	3140	94.399	3140	92.9045	3140	94.5806
3139	92.9629	3139	92.0188	3139	91.2915	3139	94.3962	3139	92.9013	3139	94.5722
3138	92.9636	3138	92.0127	3138	91.2931	3138	94.3831	3138	92.892	3138	94.5523
3137	92.9604	3137	91.999	3137	91.2964	3137	94.3833	3137	92.8927	3137	94.561
3136	92.9451	3136	91.9832	3136	91.2865	3136	94.3788	3136	92.8789	3136	94.5664
3135	92.9349	3135	91.9609	3135	91.2654	3135	94.3685	3135	92.8634	3135	94.5581
3134	92.9549	3134	91.9709	3134	91.2691	3134	94.3845	3134	92.8795	3134	94.5674
3133	92.9603	3133	91.9863	3133	91.2733	3133	94.3931	3133	92.8827	3133	94.5765
3132	92.9429	3132	91.9871	3132	91.2684	3132	94.387	3132	92.8801	3132	94.5743
3131	92.9432	3131	91.9844	3131	91.2718	3131	94.3746	3131	92.8829	3131	94.5633
3130	92.9396	3130	91.9718	3130	91.2593	3130	94.3507	3130	92.8669	3130	94.5481
3129	92.9253	3129	91.9599	3129	91.2402	3129	94.3291	3129	92.8393	3129	94.5255
3128	92.9256	3128	91.9695	3128	91.2384	3128	94.3385	3128	92.8391	3128	94.5225
3127	92.9352	3127	91.9693	3127	91.2463	3127	94.3568	3127	92.8565	3127	94.5447
3126	92.9347	3126	91.9555	3126	91.2377	3126	94.3466	3126	92.8575	3126	94.5481
3125	92.9234	3125	91.9466	3125	91.2324	3125	94.3302	3125	92.8465	3125	94.5264
3124	92.9282	3124	91.946	3124	91.2442	3124	94.3412	3124	92.8486	3124	94.5358
3123	92.9471	3123	91.9616	3123	91.2643	3123	94.3598	3123	92.8658	3123	94.5724
3122	92.9524	3122	91.9704	3122	91.2569	3122	94.3649	3122	92.8643	3122	94.5795
3121	92.9396	3121	91.9726	3121	91.2334	3121	94.3513	3121	92.848	3121	94.558
3120	92.9402	3120	91.9684	3120	91.2272	3120	94.3416	3120	92.8468	3120	94.5481
3119	92.9347	3119	91.9525	3119	91.2303	3119	94.336	3119	92.841	3119	94.5411
3118	92.9125	3118	91.9378	3118	91.2094	3118	94.3217	3118	92.8184	3118	94.5221
3117	92.9082	3117	91.9396	3117	91.1939	3117	94.3162	3117	92.8191	3117	94.5198
3116	92.9072	3116	91.9278	3116	91.1899	3116	94.3026	3116	92.8078	3116	94.515
3115	92.9049	3115	91.9141	3115	91.1738	3115	94.2872	3115	92.794	3115	94.5203
3114	92.903	3114	91.9091	3114	91.1512	3114	94.2784	3114	92.7858	3114	94.5132
3113	92.8905	3113	91.8989	3113	91.1415	3113	94.2675	3113	92.7637	3113	94.4827
3112	92.9	3112	91.9001	3112	91.148	3112	94.2611	3112	92.7555	3112	94.4708
3111	92.916	3111	91.9116	3111	91.1452	3111	94.2517	3111	92.7539	3111	94.4721
3110	92.9141	3110	91.9147	3110	91.1412	3110	94.2423	3110	92.7533	3110	94.4609
3109	92.8983	3109	91.9009	3109	91.1286	3109	94.2232	3109	92.7424	3109	94.4512
3108	92.8817	3108	91.886	3108	91.0974	3108	94.1959	3108	92.7232	3108	94.4471
3107	92.8755	3107	91.8767	3107	91.0816	3107	94.1925	3107	92.7034	3107	94.4343
3106	92.8691	3106	91.863	3106	91.0763	3106	94.1934	3106	92.6877	3106	94.4277
3105	92.8623	3105	91.8542	3105	91.0572	3105	94.1766	3105	92.6795	3105	94.4185
3104	92.8627	3104	91.8392	3104	91.042	3104	94.1541	3104	92.671	3104	94.4056
3103	92.8667	3103	91.831	3103	91.0376	3103	94.1526	3103	92.6621	3103	94.4122
3102	92.8723	3102	91.8458	3102	91.0483	3102	94.1741	3102	92.6749	3102	94.4349
3101	92.8543	3101	91.8433	3101	91.0555	3101	94.1655	3101	92.6771	3101	94.4256
3100	92.8347	3100	91.8271	3100	91.0514	3100	94.1466	3100	92.6639	3100	94.4044
3099	92.8338	3099	91.8185	3099	91.0231	3099	94.1328	3099	92.6468	3099	94.3922
3098	92.8288	3098	91.8111	3098	91.0087	3098	94.1062	3098	92.623	3098	94.3863
3097	92.8245	3097	91.7976	3097	91.0095	3097	94.0836	3097	92.6077	3097	94.3822
3096	92.8325	3096	91.7937	3096	90.9958	3096	94.0774	3096	92.6063	3096	94.3736
3095	92.8364	3095	91.7909	3095	90.9741	3095	94.0729	3095	92.5947	3095	94.3546
3094	92.8306	3094	91.7867	3094	90.9576	3094	94.0567	3094	92.573	3094	94.3331
3093	92.8233	3093	91.7825	3093	90.9552	3093	94.0365	3093	92.5654	3093	94.3319
3092	92.8174	3092	91.7851	3092	90.9392	3092	94.02	3092	92.5596	3092	94.325
3091	92.8221	3091	91.8001	3091	90.928	3091	94.0222	3091	92.5426	3091	94.3107
3090	92.825	3090	91.7943	3090	90.9377	3090	94.0141	3090	92.5398	3090	94.3133
3089	92.823	3089	91.7687	3089	90.9292	3089	93.9926	3089	92.543	3089	94.3148
3088	92.8342	3088	91.7664	3088	90.9211	3088	93.9946	3088	92.5365	3088	94.3084
3087	92.831	3087	91.7563	3087	90.9105	3087	93.9886	3087	92.5162	3087	94.2833
3086	92.8194	3086	91.7488	3086	90.9069	3086	93.9733	3086	92.4992	3086	94.2774
3085	92.8191	3085	91.7557	3085	90.8948	3085	93.9768	3085	92.4998	3085	94.2783
3084	92.8184	3084	91.7455	3084	90.8848	3084	93.9739	3084	92.4948	3084	94.2667
3083	92.8121	3083	91.7417	3083	90.8817	3083	93.969	3083	92.4853	3083	94.275
3082	92.8007	3082	91.7448	3082	90.8708	3082	93.9607	3082	92.483	3082	94.2926
3081	92.7936	3081	91.7545	3081	90.8728	3081	93.9591	3081	92.4974	3081	94.3041
3080	92.7969	3080	91.7529	3080	90.8741	3080	93.955	3080	92.5085	3080	94.2978
3079	92.8053	3079	91.7334	3079	90.8702	3079	93.9446	3079	92.5004	3079	94.2906
3078	92.7918	3078	91.7163	3078	90.8597	3078	93.9265	3078	92.4702	3078	94.2691
3077	92.7713	3077	91.7052	3077	90.8271	3077	93.9045	3077	92.4378	3077	94.2293
3076	92.7658	3076	91.6848	3076	90.7831	3076	93.8805	3076	92.4146	3076	94.2025
3075	92.7663	3075	91.6808	3075	90.7833	3075	93.8681	3075	92.4096	3075	94.2036
3074	92.7647	3074	91.6866	3074	90.7984	3074	93.8668	3074	92.3977	3074	94.2118
3073	92.7625	3073	91.6835	3073	90.7862	3073	93.8542	3073	92.3858	3073	94.203
3072	92.7661	3072	91.6833	3072	90.7838	3072	93.8545	3072	92.3987	3072	94.2016
3071	92.7785	3071	91.6831	3071	90.7992	3071	93.8623	3071	92.4064	3071	94.2078
3070	92.7904	3070	91.6869	3070	90.8021	3070	93.8717	3070	92.3966	3070	94.2193
3069	92.791	3069	91.6971	3069	90.8085	3069	93.8793	3069	92.3938	3069	94.2322
3068	92.7824	3068	91.6986	3068	90.8107	3068	93.8658	3068	92.403	3068	94.235
3067	92.7669	3067	91.6918	3067	90.7987	3067	93.8594	3067	92.4061	3067	94.2268
3066	92.7602	3066	91.6901	3066	90.7912	3066	93.8818	3066	92.4058	3066	94.232
3065	92.765	3065	91.6877	3065	90.7768	3065	93.8948	3065	92.4151	3065	94.2489
3064	92.7504	3064	91.6754	3064	90.7643	3064	93.873	3064	92.4092	3064	94.2293
3063	92.7317	3063	91.6633	3063	90.756	3063	93.8398	3063	92.3912	3063	94.1942
3062	92.7308	3062	91.6517	3062	90.7396	3062	93.8223	3062	92.3693	3062	94.1678
3061	92.73	3061	91.6498	3061	90.7416	3061	93.8221	3061	92.3578	3061	94.1699
3060	92.73	3060	91.6588	3060	90.759	3060	93.8282	3060	92.3586	3060	94.1802
3059	92.733	3059	91.6584	3059	90.7574	3059	93.8183	3059	92.3569	3059	94.1848
3058	92.746	3058	91.6608	3058	90.7561	3058	93.8204	3058	92.3663	3058	94.2075
3057	92.7452	3057	91.659	3057	90.7526	3057	93.827	3057	92.3612	3057	94.2175
3056	92.7316	3056	91.6462	3056	90.7465	3056	93.8202	3056	92.3512	3056	94.2032
3055	92.7237	3055	91.6306	3055	90.7225	3055	93.8075	3055	92.3486	3055	94.1752
3054	92.7211	3054	91.6118	3054	90.7	3054	93.789	3054	92.3308	3054	94.1559
3053	92.7295	3053	91.6128	3053	90.7185	3053	93.784	3053	92.3254	3053	94.1577
3052	92.7298	3052	91.6245	3052	90.7272	3052	93.7809	3052	92.33	3052	94.1523
3051	92.7137	3051	91.6251	3051	90.7098	3051	93.7652	3051	92.3185	3051	94.145
3050	92.7078	3050	91.6144	3050	90.6876	3050	93.7671	3050	92.3066	3050	94.1466
3049	92.7074	3049	91.5955	3049	90.6689	3049	93.7592	3049	92.3018	3049	94.1384
3048	92.7018	3048	91.5837	3048	90.6552	3048	93.7456	3048	92.2893	3048	94.1328
3047	92.6936	3047	91.5781	3047	90.6444	3047	93.7236	3047	92.2694	3047	94.119
3046	92.6952	3046	91.5727	3046	90.6412	3046	93.7022	3046	92.2495	3046	94.0962
3045	92.6973	3045	91.5754	3045	90.629	3045	93.6882	3045	92.2246	3045	94.0851
3044	92.6883	3044	91.5719	3044	90.6062	3044	93.665	3044	92.1951	3044	94.0664
3043	92.6782	3043	91.5608	3043	90.5808	3043	93.626	3043	92.1752	3043	94.0508
3042	92.6677	3042	91.5394	3042	90.5404	3042	93.5744	3042	92.1483	3042	94.0315
3041	92.6624	3041	91.5179	3041	90.4972	3041	93.5356	3041	92.1124	3041	94.0019
3040	92.6544	3040	91.4993	3040	90.4513	3040	93.506	3040	92.0728	3040	93.9759
3039	92.6486	3039	91.4766	3039	90.4076	3039	93.462	3039	92.0378	3039	93.9406
3038	92.6359	3038	91.4457	3038	90.3685	3038	93.3929	3038	91.9906	3038	93.8927
3037	92.6262	3037	91.4223	3037	90.325	3037	93.3367	3037	91.9441	3037	93.8652
3036	92.6012	3036	91.4047	3036	90.2735	3036	93.2964	3036	91.9125	3036	93.8438
3035	92.5876	3035	91.3839	3035	90.2325	3035	93.2521	3035	91.8899	3035	93.8151
3034	92.597	3034	91.3666	3034	90.1923	3034	93.2108	3034	91.8531	3034	93.7936
3033	92.5962	3033	91.3459	3033	90.1539	3033	93.1625	3033	91.81	3033	93.7783
3032	92.5767	3032	91.3215	3032	90.1067	3032	93.1109	3032	91.763	3032	93.7487
3031	92.5632	3031	91.3052	3031	90.0647	3031	93.069	3031	91.7264	3031	93.7125
3030	92.5566	3030	91.2844	3030	90.0323	3030	93.0302	3030	91.6987	3030	93.6886
3029	92.5577	3029	91.2605	3029	89.9947	3029	92.9954	3029	91.6585	3029	93.6621
3028	92.5591	3028	91.2463	3028	89.9669	3028	92.9647	3028	91.6233	3028	93.6313
3027	92.5413	3027	91.2338	3027	89.9524	3027	92.9461	3027	91.6049	3027	93.6106
3026	92.5428	3026	91.2339	3026	89.9581	3026	92.9481	3026	91.6086	3026	93.6101
3025	92.5583	3025	91.2464	3025	89.9632	3025	92.9582	3025	91.6244	3025	93.6103
3024	92.5617	3024	91.2456	3024	89.9649	3024	92.9722	3024	91.6203	3024	93.6112
3023	92.5431	3023	91.2375	3023	89.967	3023	92.9692	3023	91.6122	3023	93.6198
3022	92.5392	3022	91.2378	3022	89.9766	3022	92.9652	3022	91.6155	3022	93.6252
3021	92.5535	3021	91.2472	3021	90.0006	3021	92.9801	3021	91.6271	3021	93.6307
3020	92.5389	3020	91.2515	3020	90	3020	92.9797	3020	91.6264	3020	93.6258
3019	92.5265	3019	91.2402	3019	89.9649	3019	92.9486	3019	91.607	3019	93.603
3018	92.5264	3018	91.2069	3018	89.9041	3018	92.8832	3018	91.5596	3018	93.549
3017	92.5268	3017	91.1851	3017	89.861	3017	92.8356	3017	91.5161	3017	93.5227
3016	92.5211	3016	91.1837	3016	89.8638	3016	92.8324	3016	91.5044	3016	93.5306
3015	92.5222	3015	91.199	3015	89.8895	3015	92.8666	3015	91.536	3015	93.5564
3014	92.5407	3014	91.2165	3014	89.9238	3014	92.9184	3014	91.5962	3014	93.6075
3013	92.5431	3013	91.2275	3013	89.9454	3013	92.9544	3013	91.6154	3013	93.6412
3012	92.5192	3012	91.2154	3012	89.9493	3012	92.9583	3012	91.6007	3012	93.6412
3011	92.5148	3011	91.2063	3011	89.947	3011	92.9478	3011	91.5989	3011	93.6241
3010	92.5161	3010	91.2108	3010	89.9314	3010	92.9301	3010	91.5948	3010	93.6058
3009	92.5181	3009	91.2237	3009	89.9224	3009	92.923	3009	91.5887	3009	93.6022
3008	92.5123	3008	91.2103	3008	89.9164	3008	92.9125	3008	91.574	3008	93.5811
3007	92.4977	3007	91.186	3007	89.8992	3007	92.8952	3007	91.5488	3007	93.5552
3006	92.4957	3006	91.1912	3006	89.9025	3006	92.8889	3006	91.546	3006	93.5606
3005	92.494	3005	91.2043	3005	89.9157	3005	92.8929	3005	91.5574	3005	93.5662
3004	92.4923	3004	91.1938	3004	89.9113	3004	92.9023	3004	91.5436	3004	93.5624
3003	92.495	3003	91.1864	3003	89.8968	3003	92.8951	3003	91.5388	3003	93.5618
3002	92.4925	3002	91.1919	3002	89.892	3002	92.8876	3002	91.5496	3002	93.5601
3001	92.4879	3001	91.1985	3001	89.8953	3001	92.8959	3001	91.548	3001	93.5628
3000	92.485	3000	91.2043	3000	89.9168	3000	92.9067	3000	91.5484	3000	93.5791
2999	92.4866	2999	91.2023	2999	89.9435	2999	92.9299	2999	91.5631	2999	93.5945
2998	92.4882	2998	91.2004	2998	89.9486	2998	92.9485	2998	91.5808	2998	93.5926
2997	92.5038	2997	91.2138	2997	89.9575	2997	92.9682	2997	91.6103	2997	93.6054
2996	92.5166	2996	91.2311	2996	89.9873	2996	93.0059	2996	91.6378	2996	93.6449
2995	92.5158	2995	91.2367	2995	90.0146	2995	93.0386	2995	91.66	2995	93.6763
2994	92.5197	2994	91.2436	2994	90.0286	2994	93.056	2994	91.6785	2994	93.6839
2993	92.5099	2993	91.2556	2993	90.0408	2993	93.074	2993	91.6879	2993	93.6795
2992	92.4967	2992	91.2563	2992	90.0552	2992	93.0966	2992	91.6987	2992	93.6918
2991	92.5037	2991	91.2654	2991	90.0717	2991	93.1154	2991	91.719	2991	93.7138
2990	92.5152	2990	91.2768	2990	90.0935	2990	93.1206	2990	91.733	2990	93.7198
2989	92.5201	2989	91.2823	2989	90.1053	2989	93.1345	2989	91.74	2989	93.7203
2988	92.5137	2988	91.2785	2988	90.1114	2988	93.1493	2988	91.748	2988	93.7253
2987	92.5125	2987	91.2665	2987	90.1221	2987	93.1575	2987	91.7567	2987	93.7384
2986	92.5222	2986	91.2843	2986	90.1484	2986	93.1874	2986	91.7855	2986	93.7582
2985	92.5193	2985	91.3074	2985	90.1734	2985	93.2217	2985	91.8072	2985	93.7805
2984	92.5195	2984	91.3145	2984	90.1933	2984	93.2503	2984	91.8105	2984	93.7887
2983	92.5431	2983	91.3343	2983	90.2225	2983	93.2773	2983	91.8374	2983	93.8091
2982	92.5464	2982	91.3364	2982	90.2501	2982	93.2984	2982	91.859	2982	93.8304
2981	92.5339	2981	91.3237	2981	90.2481	2981	93.3053	2981	91.8616	2981	93.8354
2980	92.5339	2980	91.3327	2980	90.2457	2980	93.3284	2980	91.8737	2980	93.8323
2979	92.5329	2979	91.3295	2979	90.2401	2979	93.3297	2979	91.871	2979	93.8214
2978	92.5187	2978	91.3051	2978	90.2276	2978	93.2977	2978	91.8511	2978	93.8099
2977	92.5095	2977	91.3009	2977	90.2068	2977	93.2586	2977	91.8327	2977	93.7977
2976	92.5188	2976	91.3015	2976	90.1727	2976	93.216	2976	91.8024	2976	93.7781
2975	92.498	2975	91.2638	2975	90.0905	2975	93.1261	2975	91.7212	2975	93.7208
2974	92.4579	2974	91.1865	2974	89.9424	2974	92.9653	2974	91.5855	2974	93.6086
2973	92.4195	2973	91.0638	2973	89.7165	2973	92.6992	2973	91.3706	2973	93.4302
2972	92.3614	2972	90.9019	2972	89.3664	2972	92.3131	2972	91.0483	2972	93.1785
2971	92.2952	2971	90.7452	2971	88.9931	2971	91.9028	2971	90.6972	2971	92.9126
2970	92.2719	2970	90.7008	2970	88.9167	2970	91.795	2970	90.6145	2970	92.853
2969	92.3216	2969	90.8258	2969	89.202	2969	92.1167	2969	90.8897	2969	93.0688
2968	92.3946	2968	90.9998	2968	89.5607	2968	92.547	2968	91.2262	2968	93.334
2967	92.4368	2967	91.1237	2967	89.8215	2967	92.8455	2967	91.4587	2967	93.5222
2966	92.4539	2966	91.1892	2966	89.9816	2966	93.0225	2966	91.6171	2966	93.6377
2965	92.4785	2965	91.2369	2965	90.0922	2965	93.1438	2965	91.7276	2965	93.721
2964	92.4972	2964	91.2693	2964	90.1508	2964	93.2128	2964	91.782	2964	93.7717
2963	92.5054	2963	91.2772	2963	90.1729	2963	93.2422	2963	91.8004	2963	93.7748
2962	92.5017	2962	91.2763	2962	90.1801	2962	93.2384	2962	91.8068	2962	93.7792
2961	92.4796	2961	91.2654	2961	90.1561	2961	93.214	2961	91.7967	2961	93.7807
2960	92.4774	2960	91.2565	2960	90.1269	2960	93.2103	2960	91.7814	2960	93.7617
2959	92.4979	2959	91.2605	2959	90.1381	2959	93.2251	2959	91.779	2959	93.7619
2958	92.4902	2958	91.2442	2958	90.1311	2958	93.2039	2958	91.7672	2958	93.7523
2957	92.4668	2957	91.2163	2957	90.0937	2957	93.1606	2957	91.734	2957	93.7254
2956	92.4591	2956	91.1994	2956	90.0656	2956	93.1363	2956	91.6952	2956	93.7022
2955	92.4583	2955	91.1955	2955	90.0438	2955	93.1169	2955	91.6707	2955	93.6866
2954	92.4531	2954	91.1979	2954	90.0233	2954	93.0943	2954	91.66	2954	93.679
2953	92.4446	2953	91.2001	2953	90.0129	2953	93.0802	2953	91.6518	2953	93.6737
2952	92.4353	2952	91.1833	2952	89.9964	2952	93.0539	2952	91.6318	2952	93.6598
2951	92.4395	2951	91.1563	2951	89.9742	2951	93.0294	2951	91.6138	2951	93.6373
2950	92.4404	2950	91.1382	2950	89.9529	2950	93.0139	2950	91.6044	2950	93.6156
2949	92.4468	2949	91.1493	2949	89.9538	2949	93.011	2949	91.61	2949	93.615
2948	92.449	2948	91.1592	2948	89.9506	2948	93.0014	2948	91.5929	2948	93.6103
2947	92.4326	2947	91.153	2947	89.9345	2947	92.9854	2947	91.5683	2947	93.6064
2946	92.4191	2946	91.1466	2946	89.928	2946	92.9852	2946	91.5671	2946	93.619
2945	92.4092	2945	91.1364	2945	89.9233	2945	92.9863	2945	91.5678	2945	93.6179
2944	92.4063	2944	91.1261	2944	89.9308	2944	92.9888	2944	91.565	2944	93.6151
2943	92.4092	2943	91.1217	2943	89.9292	2943	92.9895	2943	91.5677	2943	93.6139
2942	92.4152	2942	91.1425	2942	89.9436	2942	93.0111	2942	91.5803	2942	93.6203
2941	92.4242	2941	91.1668	2941	89.9729	2941	93.0366	2941	91.6012	2941	93.6329
2940	92.424	2940	91.1665	2940	89.9861	2940	93.0431	2940	91.6239	2940	93.6519
2939	92.4242	2939	91.1576	2939	89.9951	2939	93.0633	2939	91.6409	2939	93.6671
2938	92.425	2938	91.1657	2938	90.0172	2938	93.0965	2938	91.6561	2938	93.678
2937	92.439	2937	91.1938	2937	90.0472	2937	93.1286	2937	91.6891	2937	93.699
2936	92.4396	2936	91.2032	2936	90.067	2936	93.1546	2936	91.7184	2936	93.7273
2935	92.4244	2935	91.1975	2935	90.089	2935	93.1847	2935	91.7361	2935	93.7469
2934	92.4334	2934	91.2015	2934	90.1214	2934	93.2138	2934	91.7535	2934	93.754
2933	92.4547	2933	91.218	2933	90.1435	2933	93.228	2933	91.7691	2933	93.7654
2932	92.4578	2932	91.2369	2932	90.1563	2932	93.2363	2932	91.7758	2932	93.7802
2931	92.463	2931	91.2504	2931	90.1579	2931	93.2442	2931	91.7789	2931	93.7858
2930	92.4625	2930	91.2334	2930	90.1351	2930	93.2404	2930	91.7785	2930	93.7778
2929	92.4562	2929	91.2192	2929	90.1298	2929	93.2274	2929	91.7699	2929	93.7699
2928	92.4447	2928	91.2074	2928	90.1342	2928	93.2175	2928	91.7616	2928	93.7676
2927	92.44	2927	91.2014	2927	90.1364	2927	93.223	2927	91.7659	2927	93.776
2926	92.4364	2926	91.1968	2926	90.1294	2926	93.23	2926	91.7682	2926	93.7721
2925	92.4312	2925	91.1968	2925	90.135	2925	93.2396	2925	91.7848	2925	93.7783
2924	92.4351	2924	91.2025	2924	90.1469	2924	93.2502	2924	91.7982	2924	93.7973
2923	92.4416	2923	91.2108	2923	90.1485	2923	93.2682	2923	91.8033	2923	93.7922
2922	92.4453	2922	91.2166	2922	90.1569	2922	93.2858	2922	91.8072	2922	93.7932
2921	92.4449	2921	91.221	2921	90.1822	2921	93.3081	2921	91.8201	2921	93.8117
2920	92.4325	2920	91.2252	2920	90.1921	2920	93.3233	2920	91.8312	2920	93.8156
2919	92.4284	2919	91.2307	2919	90.1996	2919	93.334	2919	91.841	2919	93.8241
2918	92.4343	2918	91.2365	2918	90.2244	2918	93.3497	2918	91.8537	2918	93.8423
2917	92.4333	2917	91.2473	2917	90.2536	2917	93.3763	2917	91.8736	2917	93.866
2916	92.4279	2916	91.2439	2916	90.2604	2916	93.399	2916	91.8908	2916	93.8784
2915	92.4308	2915	91.2452	2915	90.2749	2915	93.4246	2915	91.9142	2915	93.8847
2914	92.4379	2914	91.2642	2914	90.309	2914	93.4529	2914	91.9401	2914	93.9017
2913	92.4315	2913	91.2777	2913	90.3288	2913	93.4767	2913	91.9522	2913	93.9134
2912	92.419	2912	91.2825	2912	90.3392	2912	93.4995	2912	91.9684	2912	93.9235
2911	92.4147	2911	91.2792	2911	90.3526	2911	93.5232	2911	91.9889	2911	93.9345
2910	92.4205	2910	91.2816	2910	90.361	2910	93.5467	2910	92.0041	2910	93.9393
2909	92.4286	2909	91.295	2909	90.3747	2909	93.5711	2909	92.0139	2909	93.957
2908	92.4367	2908	91.3068	2908	90.4096	2908	93.6088	2908	92.0414	2908	93.9857
2907	92.4315	2907	91.3163	2907	90.4432	2907	93.6324	2907	92.0686	2907	94.0006
2906	92.4284	2906	91.3327	2906	90.4671	2906	93.6515	2906	92.0837	2906	94.0189
2905	92.4439	2905	91.3517	2905	90.4873	2905	93.6791	2905	92.1038	2905	94.036
2904	92.4494	2904	91.3429	2904	90.4965	2904	93.6985	2904	92.1169	2904	94.0309
2903	92.4451	2903	91.3337	2903	90.4909	2903	93.7127	2903	92.1158	2903	94.0361
2902	92.4415	2902	91.3369	2902	90.4988	2902	93.7175	2902	92.1167	2902	94.0495
2901	92.4336	2901	91.3486	2901	90.519	2901	93.7226	2901	92.1294	2901	94.0597
2900	92.438	2900	91.3574	2900	90.5341	2900	93.7351	2900	92.1433	2900	94.0626
2899	92.445	2899	91.3552	2899	90.5323	2899	93.7552	2899	92.1507	2899	94.0682
2898	92.4521	2898	91.3638	2898	90.5386	2898	93.7758	2898	92.1621	2898	94.0821
2897	92.4621	2897	91.3756	2897	90.5572	2897	93.7909	2897	92.1799	2897	94.088
2896	92.456	2896	91.37	2896	90.5671	2896	93.7936	2896	92.1858	2896	94.0949
2895	92.428	2895	91.3569	2895	90.5587	2895	93.7826	2895	92.1664	2895	94.0959
2894	92.4108	2894	91.3544	2894	90.5404	2894	93.7729	2894	92.16	2894	94.0906
2893	92.4248	2893	91.3613	2893	90.5402	2893	93.7751	2893	92.1703	2893	94.0877
2892	92.4391	2892	91.3783	2892	90.5633	2892	93.7998	2892	92.1827	2892	94.0991
2891	92.4365	2891	91.3701	2891	90.569	2891	93.809	2891	92.1781	2891	94.0996
2890	92.428	2890	91.3511	2890	90.5649	2890	93.8028	2890	92.1739	2890	94.0864
2889	92.418	2889	91.3554	2889	90.5549	2889	93.8032	2889	92.1815	2889	94.0876
2888	92.4184	2888	91.3686	2888	90.5485	2888	93.8078	2888	92.185	2888	94.1066
2887	92.4266	2887	91.3646	2887	90.5588	2887	93.8094	2887	92.179	2887	94.1156
2886	92.4322	2886	91.3582	2886	90.5695	2886	93.8018	2886	92.1739	2886	94.1127
2885	92.4198	2885	91.3499	2885	90.5604	2885	93.7904	2885	92.1723	2885	94.1025
2884	92.4098	2884	91.344	2884	90.551	2884	93.7947	2884	92.1748	2884	94.0933
2883	92.4154	2883	91.3478	2883	90.5555	2883	93.801	2883	92.173	2883	94.0981
2882	92.4173	2882	91.3433	2882	90.5475	2882	93.7947	2882	92.1654	2882	94.0929
2881	92.4198	2881	91.3413	2881	90.5435	2881	93.8013	2881	92.1692	2881	94.0879
2880	92.424	2880	91.3475	2880	90.552	2880	93.8153	2880	92.1847	2880	94.098
2879	92.4177	2879	91.3393	2879	90.5369	2879	93.8018	2879	92.1834	2879	94.0948
2878	92.4048	2878	91.3259	2878	90.5161	2878	93.7826	2878	92.1682	2878	94.0736
2877	92.3984	2877	91.3269	2877	90.5218	2877	93.7852	2877	92.1683	2877	94.0733
2876	92.402	2876	91.3279	2876	90.5288	2876	93.7894	2876	92.1587	2876	94.0801
2875	92.4054	2875	91.3359	2875	90.5308	2875	93.7947	2875	92.1457	2875	94.0769
2874	92.4005	2874	91.3507	2874	90.5394	2874	93.7969	2874	92.1557	2874	94.0753
2873	92.3911	2873	91.3333	2873	90.5267	2873	93.7828	2873	92.1545	2873	94.0613
2872	92.387	2872	91.3059	2872	90.5093	2872	93.7724	2872	92.135	2872	94.0548
2871	92.3821	2871	91.3037	2871	90.491	2871	93.7588	2871	92.1323	2871	94.059
2870	92.3812	2870	91.3049	2870	90.4818	2870	93.7465	2870	92.1322	2870	94.056
2869	92.3904	2869	91.312	2869	90.4883	2869	93.7494	2869	92.1364	2869	94.0619
2868	92.3822	2868	91.3094	2868	90.4748	2868	93.7549	2868	92.1286	2868	94.0576
2867	92.3764	2867	91.2995	2867	90.4682	2867	93.7616	2867	92.1273	2867	94.0455
2866	92.3749	2866	91.2892	2866	90.489	2866	93.7549	2866	92.1196	2866	94.0415
2865	92.3674	2865	91.2801	2865	90.4953	2865	93.7405	2865	92.0967	2865	94.0436
2864	92.3727	2864	91.2904	2864	90.4799	2864	93.7364	2864	92.0921	2864	94.0465
2863	92.3818	2863	91.3003	2863	90.481	2863	93.7406	2863	92.1025	2863	94.0471
2862	92.3798	2862	91.2945	2862	90.4828	2862	93.7473	2862	92.1096	2862	94.0466
2861	92.3733	2861	91.2849	2861	90.4716	2861	93.7493	2861	92.116	2861	94.0469
2860	92.3643	2860	91.2776	2860	90.4673	2860	93.7521	2860	92.1155	2860	94.0427
2859	92.3672	2859	91.288	2859	90.4726	2859	93.7607	2859	92.1142	2859	94.0518
2858	92.3774	2858	91.3031	2858	90.4788	2858	93.7693	2858	92.1191	2858	94.0664
2857	92.3731	2857	91.2973	2857	90.4757	2857	93.7657	2857	92.1166	2857	94.0595
2856	92.3706	2856	91.2786	2856	90.4687	2856	93.7609	2856	92.1128	2856	94.0443
2855	92.3674	2855	91.2732	2855	90.4564	2855	93.7567	2855	92.1	2855	94.0434
2854	92.3665	2854	91.2861	2854	90.4631	2854	93.758	2854	92.1098	2854	94.0616
2853	92.3612	2853	91.2861	2853	90.4746	2853	93.7603	2853	92.1203	2853	94.0675
2852	92.3559	2852	91.2784	2852	90.4742	2852	93.7673	2852	92.1149	2852	94.0609
2851	92.3586	2851	91.285	2851	90.4707	2851	93.7738	2851	92.1131	2851	94.0524
2850	92.3614	2850	91.2896	2850	90.4721	2850	93.7779	2850	92.1202	2850	94.0582
2849	92.3499	2849	91.2827	2849	90.4742	2849	93.778	2849	92.1238	2849	94.0564
2848	92.341	2848	91.2811	2848	90.4594	2848	93.7731	2848	92.1252	2848	94.0445
2847	92.3388	2847	91.2761	2847	90.4416	2847	93.7629	2847	92.1106	2847	94.0423
2846	92.3322	2846	91.2636	2846	90.4398	2846	93.7512	2846	92.0832	2846	94.0393
2845	92.3278	2845	91.2463	2845	90.4474	2845	93.756	2845	92.079	2845	94.0262
2844	92.3312	2844	91.2389	2844	90.4445	2844	93.7677	2844	92.0872	2844	94.0298
2843	92.3253	2843	91.2388	2843	90.442	2843	93.765	2843	92.0946	2843	94.0339
2842	92.3156	2842	91.2382	2842	90.4533	2842	93.771	2842	92.0992	2842	94.0363
2841	92.3284	2841	91.2521	2841	90.4684	2841	93.783	2841	92.1068	2841	94.047
2840	92.3417	2840	91.2689	2840	90.4703	2840	93.7877	2840	92.1122	2840	94.0543
2839	92.3266	2839	91.2641	2839	90.4625	2839	93.7956	2839	92.1055	2839	94.049
2838	92.3072	2838	91.2527	2838	90.4502	2838	93.7948	2838	92.1014	2838	94.0409
2837	92.2966	2837	91.2413	2837	90.4371	2837	93.7822	2837	92.1008	2837	94.0434
2836	92.2995	2836	91.247	2836	90.4388	2836	93.7819	2836	92.1018	2836	94.0389
2835	92.3073	2835	91.2636	2835	90.4601	2835	93.7975	2835	92.1051	2835	94.036
2834	92.3028	2834	91.2568	2834	90.4656	2834	93.8054	2834	92.1025	2834	94.0391
2833	92.3038	2833	91.2543	2833	90.4552	2833	93.8035	2833	92.1096	2833	94.05
2832	92.3092	2832	91.2558	2832	90.4538	2832	93.8097	2832	92.1121	2832	94.0553
2831	92.3077	2831	91.2493	2831	90.4556	2831	93.8084	2831	92.1042	2831	94.0485
2830	92.298	2830	91.245	2830	90.4583	2830	93.7982	2830	92.1089	2830	94.0429
2829	92.2968	2829	91.243	2829	90.4657	2829	93.7978	2829	92.1136	2829	94.0467
2828	92.3013	2828	91.2453	2828	90.4663	2828	93.813	2828	92.1204	2828	94.0599
2827	92.2998	2827	91.2426	2827	90.4695	2827	93.8269	2827	92.1197	2827	94.061
2826	92.3058	2826	91.2432	2826	90.4757	2826	93.8355	2826	92.1243	2826	94.0658
2825	92.3005	2825	91.2502	2825	90.4735	2825	93.8398	2825	92.1268	2825	94.0763
2824	92.2811	2824	91.2402	2824	90.4616	2824	93.8231	2824	92.1116	2824	94.0602
2823	92.2762	2823	91.2317	2823	90.4501	2823	93.814	2823	92.1046	2823	94.0516
2822	92.277	2822	91.2334	2822	90.4466	2822	93.8191	2822	92.1073	2822	94.0563
2821	92.2765	2821	91.2372	2821	90.4536	2821	93.8181	2821	92.1162	2821	94.0547
2820	92.2729	2820	91.2322	2820	90.4578	2820	93.818	2820	92.1145	2820	94.0467
2819	92.2812	2819	91.221	2819	90.4548	2819	93.8173	2819	92.0994	2819	94.0414
2818	92.2781	2818	91.2195	2818	90.4549	2818	93.814	2818	92.099	2818	94.0438
2817	92.2617	2817	91.2287	2817	90.455	2817	93.8234	2817	92.1071	2817	94.0432
2816	92.2628	2816	91.2324	2816	90.4606	2816	93.8337	2816	92.1151	2816	94.0469
2815	92.2706	2815	91.2222	2815	90.4643	2815	93.83	2815	92.1103	2815	94.0541
2814	92.2692	2814	91.2109	2814	90.4564	2814	93.813	2814	92.1003	2814	94.0465
2813	92.2698	2813	91.2163	2813	90.4498	2813	93.8104	2813	92.1021	2813	94.0364
2812	92.2706	2812	91.2206	2812	90.4429	2812	93.8166	2812	92.1022	2812	94.0345
2811	92.2678	2811	91.219	2811	90.4439	2811	93.809	2811	92.0981	2811	94.036
2810	92.2553	2810	91.2089	2810	90.4403	2810	93.8058	2810	92.0926	2810	94.0316
2809	92.2487	2809	91.1985	2809	90.4299	2809	93.8054	2809	92.0892	2809	94.0277
2808	92.2554	2808	91.1965	2808	90.4256	2808	93.8102	2808	92.092	2808	94.0262
2807	92.2649	2807	91.1982	2807	90.4263	2807	93.8086	2807	92.0969	2807	94.0279
2806	92.2669	2806	91.2086	2806	90.4285	2806	93.8069	2806	92.1041	2806	94.0375
2805	92.2586	2805	91.209	2805	90.4296	2805	93.8076	2805	92.0987	2805	94.0353
2804	92.2398	2804	91.1984	2804	90.4261	2804	93.8047	2804	92.0722	2804	94.0204
2803	92.2374	2803	91.1957	2803	90.4179	2803	93.7968	2803	92.0622	2803	94.0182
2802	92.2543	2802	91.2015	2802	90.413	2802	93.8025	2802	92.0802	2802	94.0266
2801	92.2594	2801	91.2077	2801	90.4172	2801	93.8112	2801	92.0897	2801	94.0293
2800	92.2436	2800	91.1923	2800	90.4133	2800	93.8103	2800	92.0843	2800	94.0309
2799	92.2222	2799	91.1727	2799	90.398	2799	93.8032	2799	92.0746	2799	94.0303
2798	92.2234	2798	91.1773	2798	90.3948	2798	93.805	2798	92.0709	2798	94.0306
2797	92.2411	2797	91.1838	2797	90.4004	2797	93.813	2797	92.069	2797	94.0298
2796	92.2392	2796	91.1657	2796	90.4013	2796	93.8058	2796	92.057	2796	94.0243
2795	92.2157	2795	91.1411	2795	90.3872	2795	93.7881	2795	92.0395	2795	94.0099
2794	92.2121	2794	91.1559	2794	90.3748	2794	93.7918	2794	92.0418	2794	94.0051
2793	92.2329	2793	91.1812	2793	90.3926	2793	93.8041	2793	92.0619	2793	94.0167
2792	92.2398	2792	91.18	2792	90.4122	2792	93.8033	2792	92.0691	2792	94.0227
2791	92.2179	2791	91.1631	2791	90.4137	2791	93.7849	2791	92.0595	2791	94.0097
2790	92.2202	2790	91.1605	2790	90.4043	2790	93.7928	2790	92.0642	2790	94.0165
2789	92.2313	2789	91.1743	2789	90.3931	2789	93.8054	2789	92.0692	2789	94.0245
2788	92.2109	2788	91.1753	2788	90.3828	2788	93.7888	2788	92.0622	2788	94.0171
2787	92.202	2787	91.1739	2787	90.3732	2787	93.7851	2787	92.0598	2787	94.0082
2786	92.2151	2786	91.1719	2786	90.3756	2786	93.8109	2786	92.063	2786	94.0098
2785	92.2138	2785	91.1641	2785	90.374	2785	93.8013	2785	92.0558	2785	94.0125
2784	92.2026	2784	91.1484	2784	90.3652	2784	93.7862	2784	92.0472	2784	93.9981
2783	92.2033	2783	91.1387	2783	90.359	2783	93.7922	2783	92.0431	2783	93.9676
2782	92.1952	2782	91.1338	2782	90.3549	2782	93.7888	2782	92.0412	2782	93.9571
2781	92.1922	2781	91.1407	2781	90.3555	2781	93.7886	2781	92.0398	2781	93.9894
2780	92.2011	2780	91.1465	2780	90.3586	2780	93.7977	2780	92.0421	2780	94.006
2779	92.2039	2779	91.1556	2779	90.3607	2779	93.8033	2779	92.0468	2779	93.9981
2778	92.1956	2778	91.1569	2778	90.3593	2778	93.7951	2778	92.0427	2778	93.9946
2777	92.1975	2777	91.145	2777	90.3523	2777	93.7902	2777	92.0399	2777	93.9945
2776	92.2038	2776	91.1412	2776	90.3495	2776	93.794	2776	92.0403	2776	93.9928
2775	92.201	2775	91.1448	2775	90.3518	2775	93.7985	2775	92.0327	2775	93.9984
2774	92.1944	2774	91.1482	2774	90.3507	2774	93.7941	2774	92.034	2774	94.0003
2773	92.1841	2773	91.141	2773	90.3417	2773	93.7916	2773	92.0362	2773	93.9863
2772	92.1838	2772	91.1314	2772	90.3393	2772	93.7922	2772	92.0265	2772	93.9846
2771	92.1861	2771	91.1345	2771	90.3399	2771	93.788	2771	92.0213	2771	93.9866
2770	92.1784	2770	91.1137	2770	90.3331	2770	93.7796	2770	92.0156	2770	93.9788
2769	92.1666	2769	91.1036	2769	90.3302	2769	93.7773	2769	92.0158	2769	93.983
2768	92.1655	2768	91.1169	2768	90.3355	2768	93.7859	2768	92.0302	2768	93.9862
2767	92.1655	2767	91.1181	2767	90.3453	2767	93.7856	2767	92.0305	2767	93.992
2766	92.1575	2766	91.1054	2766	90.3454	2766	93.7839	2766	92.0239	2766	93.999
2765	92.1621	2765	91.1152	2765	90.3361	2765	93.7926	2765	92.0323	2765	93.9894
2764	92.1631	2764	91.1287	2764	90.3363	2764	93.7905	2764	92.0361	2764	93.9777
2763	92.1534	2763	91.1184	2763	90.3387	2763	93.7802	2763	92.0226	2763	93.9737
2762	92.157	2762	91.1075	2762	90.3279	2762	93.7749	2762	92.0127	2762	93.9813
2761	92.1609	2761	91.1012	2761	90.3091	2761	93.768	2761	92.0033	2761	93.9847
2760	92.1566	2760	91.104	2760	90.303	2760	93.7745	2760	91.997	2760	93.9805
2759	92.1566	2759	91.1054	2759	90.3086	2759	93.7787	2759	91.9948	2759	93.9733
2758	92.1506	2758	91.103	2758	90.3123	2758	93.766	2758	92.0062	2758	93.9718
2757	92.1482	2757	91.1026	2757	90.3164	2757	93.7651	2757	92.0255	2757	93.9774
2756	92.1438	2756	91.0973	2756	90.3181	2756	93.7683	2756	92.019	2756	93.9761
2755	92.1382	2755	91.0945	2755	90.3203	2755	93.7734	2755	92.0024	2755	93.9757
2754	92.1379	2754	91.0927	2754	90.3125	2754	93.7774	2754	91.9949	2754	93.9621
2753	92.1381	2753	91.0905	2753	90.2993	2753	93.7718	2753	91.9905	2753	93.9561
2752	92.1418	2752	91.0903	2752	90.3068	2752	93.7736	2752	91.9869	2752	93.97
2751	92.1344	2751	91.085	2751	90.3105	2751	93.7809	2751	91.986	2751	93.9782
2750	92.1277	2750	91.0754	2750	90.2945	2750	93.7734	2750	91.9862	2750	93.9778
2749	92.1263	2749	91.0704	2749	90.2961	2749	93.7618	2749	91.9915	2749	93.9774
2748	92.1252	2748	91.0783	2748	90.3097	2748	93.7631	2748	91.9943	2748	93.9743
2747	92.1208	2747	91.0917	2747	90.2982	2747	93.7657	2747	91.9904	2747	93.9649
2746	92.1091	2746	91.0783	2746	90.2793	2746	93.7597	2746	91.9837	2746	93.9581
2745	92.0984	2745	91.0596	2745	90.2651	2745	93.7486	2745	91.9698	2745	93.9516
2744	92.1087	2744	91.0614	2744	90.2716	2744	93.7566	2744	91.9673	2744	93.9594
2743	92.1169	2743	91.0615	2743	90.2809	2743	93.7657	2743	91.9703	2743	93.9568
2742	92.1059	2742	91.0541	2742	90.2745	2742	93.7598	2742	91.968	2742	93.9473
2741	92.1073	2741	91.0526	2741	90.2681	2741	93.7578	2741	91.965	2741	93.9506
2740	92.1153	2740	91.056	2740	90.2728	2740	93.7585	2740	91.9741	2740	93.9561
2739	92.1059	2739	91.055	2739	90.2678	2739	93.7498	2739	91.979	2739	93.9586
2738	92.1022	2738	91.0537	2738	90.264	2738	93.743	2738	91.9744	2738	93.9607
2737	92.1008	2737	91.0508	2737	90.2668	2737	93.7429	2737	91.965	2737	93.9616
2736	92.095	2736	91.0443	2736	90.2574	2736	93.7453	2736	91.9532	2736	93.9482
2735	92.0942	2735	91.0373	2735	90.2547	2735	93.7396	2735	91.953	2735	93.9356
2734	92.1006	2734	91.0413	2734	90.2621	2734	93.7333	2734	91.9495	2734	93.9362
2733	92.1021	2733	91.0505	2733	90.2482	2733	93.7335	2733	91.9452	2733	93.9397
2732	92.0982	2732	91.0456	2732	90.2354	2732	93.7296	2732	91.9525	2732	93.9412
2731	92.097	2731	91.0343	2731	90.2379	2731	93.7355	2731	91.9585	2731	93.9342
2730	92.0953	2730	91.0297	2730	90.2343	2730	93.7442	2730	91.9518	2730	93.9263
2729	92.094	2729	91.0197	2729	90.2281	2729	93.7365	2729	91.9442	2729	93.9234
2728	92.0891	2728	91.0254	2728	90.2332	2728	93.7312	2728	91.9493	2728	93.9275
2727	92.0807	2727	91.0331	2727	90.2328	2727	93.7367	2727	91.9495	2727	93.9324
2726	92.0658	2726	91.0282	2726	90.2186	2726	93.7276	2726	91.9239	2726	93.923
2725	92.0559	2725	91.0141	2725	90.2139	2725	93.7115	2725	91.9079	2725	93.9048
2724	92.0696	2724	91.0098	2724	90.2329	2724	93.7195	2724	91.9164	2724	93.9135
2723	92.0735	2723	91.0078	2723	90.2346	2723	93.7247	2723	91.9226	2723	93.9225
2722	92.0618	2722	90.9948	2722	90.2159	2722	93.7162	2722	91.9221	2722	93.9209
2721	92.0631	2721	90.9993	2721	90.216	2721	93.7179	2721	91.9313	2721	93.9304
2720	92.0618	2720	91.008	2720	90.2237	2720	93.7244	2720	91.9266	2720	93.9328
2719	92.0684	2719	91.0059	2719	90.2146	2719	93.7283	2719	91.919	2719	93.9206
2718	92.0789	2718	91.0033	2718	90.202	2718	93.7291	2718	91.9232	2718	93.9109
2717	92.0743	2717	91.0061	2717	90.2064	2717	93.7276	2717	91.9224	2717	93.914
2716	92.0648	2716	91.0071	2716	90.204	2716	93.7214	2716	91.9129	2716	93.9203
2715	92.0539	2715	90.9949	2715	90.191	2715	93.706	2715	91.912	2715	93.9208
2714	92.0456	2714	90.9869	2714	90.1885	2714	93.6996	2714	91.9097	2714	93.9093
2713	92.0411	2713	90.9875	2713	90.1861	2713	93.7045	2713	91.8951	2713	93.9008
2712	92.0441	2712	90.9893	2712	90.1839	2712	93.7112	2712	91.8955	2712	93.9017
2711	92.0395	2711	90.9864	2711	90.1857	2711	93.7176	2711	91.9044	2711	93.8951
2710	92.0386	2710	90.9844	2710	90.1884	2710	93.7226	2710	91.9026	2710	93.8881
2709	92.0335	2709	90.9749	2709	90.1812	2709	93.7134	2709	91.8964	2709	93.8858
2708	92.0332	2708	90.9698	2708	90.1764	2708	93.7071	2708	91.8927	2708	93.8931
2707	92.0298	2707	90.971	2707	90.172	2707	93.7038	2707	91.8882	2707	93.8887
2706	92.0239	2706	90.9659	2706	90.1621	2706	93.6983	2706	91.8782	2706	93.8784
2705	92.0203	2705	90.9609	2705	90.1535	2705	93.6965	2705	91.8825	2705	93.8835
2704	92.0243	2704	90.973	2704	90.1616	2704	93.7045	2704	91.8886	2704	93.897
2703	92.0233	2703	90.9762	2703	90.1716	2703	93.7071	2703	91.8841	2703	93.9056
2702	92.0192	2702	90.9637	2702	90.1649	2702	93.6948	2702	91.8819	2702	93.9021
2701	92.0217	2701	90.9552	2701	90.1582	2701	93.6956	2701	91.8764	2701	93.8932
2700	92.0179	2700	90.9554	2700	90.1585	2700	93.6999	2700	91.8621	2700	93.8874
2699	92.0107	2699	90.9534	2699	90.1545	2699	93.6917	2699	91.8553	2699	93.8845
2698	92.0008	2698	90.9402	2698	90.1422	2698	93.6851	2698	91.8567	2698	93.8783
2697	91.9971	2697	90.9399	2697	90.1382	2697	93.6807	2697	91.8673	2697	93.8747
2696	91.9989	2696	90.9471	2696	90.1437	2696	93.68	2696	91.8773	2696	93.8782
2695	92.0021	2695	90.9491	2695	90.1503	2695	93.688	2695	91.8775	2695	93.8871
2694	92.0033	2694	90.9434	2694	90.1464	2694	93.6857	2694	91.8683	2694	93.8876
2693	92.0005	2693	90.942	2693	90.1411	2693	93.6838	2693	91.8581	2693	93.8797
2692	91.9961	2692	90.9403	2692	90.1455	2692	93.6797	2692	91.8526	2692	93.8743
2691	91.9932	2691	90.9357	2691	90.1414	2691	93.6781	2691	91.8488	2691	93.8751
2690	91.9921	2690	90.9353	2690	90.1295	2690	93.6876	2690	91.8447	2690	93.8796
2689	91.9884	2689	90.9291	2689	90.1124	2689	93.6797	2689	91.8491	2689	93.8727
2688	91.9909	2688	90.9212	2688	90.1154	2688	93.6712	2688	91.8554	2688	93.8738
2687	91.9923	2687	90.9239	2687	90.1281	2687	93.6772	2687	91.8515	2687	93.8791
2686	91.9802	2686	90.9159	2686	90.1232	2686	93.6705	2686	91.846	2686	93.873
2685	91.9768	2685	90.9112	2685	90.1171	2685	93.6709	2685	91.8488	2685	93.8659
2684	91.9757	2684	90.9201	2684	90.1236	2684	93.6769	2684	91.8485	2684	93.8735
2683	91.9793	2683	90.9198	2683	90.1315	2683	93.6706	2683	91.8432	2683	93.8787
2682	91.983	2682	90.9115	2682	90.1324	2682	93.668	2682	91.8429	2682	93.8659
2681	91.9823	2681	90.9112	2681	90.1294	2681	93.6697	2681	91.8419	2681	93.8631
2680	91.9804	2680	90.9123	2680	90.1215	2680	93.6672	2680	91.8367	2680	93.8725
2679	91.9679	2679	90.9022	2679	90.1153	2679	93.6692	2679	91.8349	2679	93.868
2678	91.9606	2678	90.8938	2678	90.1108	2678	93.6697	2678	91.8373	2678	93.8586
2677	91.9604	2677	90.8914	2677	90.0995	2677	93.6631	2677	91.831	2677	93.857
2676	91.9575	2676	90.8874	2676	90.0896	2676	93.6597	2676	91.8208	2676	93.8569
2675	91.9545	2675	90.8841	2675	90.0925	2675	93.6571	2675	91.8047	2675	93.8558
2674	91.9547	2674	90.8852	2674	90.0931	2674	93.658	2674	91.802	2674	93.8522
2673	91.9469	2673	90.8869	2673	90.0808	2673	93.6547	2673	91.8096	2673	93.8434
2672	91.9384	2672	90.8828	2672	90.0711	2672	93.6501	2672	91.8053	2672	93.8407
2671	91.942	2671	90.8787	2671	90.0787	2671	93.6468	2671	91.8005	2671	93.8446
2670	91.9468	2670	90.8791	2670	90.0884	2670	93.6439	2670	91.8032	2670	93.8475
2669	91.9412	2669	90.8819	2669	90.0811	2669	93.6389	2669	91.8103	2669	93.8458
2668	91.9417	2668	90.8818	2668	90.0784	2668	93.6407	2668	91.8157	2668	93.8495
2667	91.932	2667	90.8744	2667	90.073	2667	93.6387	2667	91.8077	2667	93.8457
2666	91.9248	2666	90.8747	2666	90.0679	2666	93.6381	2666	91.8084	2666	93.8459
2665	91.9316	2665	90.8725	2665	90.0648	2665	93.6378	2665	91.8029	2665	93.8414
2664	91.9208	2664	90.8493	2664	90.0615	2664	93.624	2664	91.7798	2664	93.8164
2663	91.9043	2663	90.8405	2663	90.0538	2663	93.6127	2663	91.7666	2663	93.8027
2662	91.9023	2662	90.8306	2662	90.0398	2662	93.6106	2662	91.7687	2662	93.8021
2661	91.9059	2661	90.8296	2661	90.0356	2661	93.6003	2661	91.7641	2661	93.7826
2660	91.9219	2660	90.8475	2660	90.0586	2660	93.6025	2660	91.7658	2660	93.7862
2659	91.9331	2659	90.8554	2659	90.0712	2659	93.6141	2659	91.7765	2659	93.7998
2658	91.922	2658	90.8569	2658	90.06	2658	93.6106	2658	91.7705	2658	93.7941
2657	91.918	2657	90.8593	2657	90.0489	2657	93.606	2657	91.769	2657	93.7917
2656	91.9247	2656	90.8583	2656	90.0588	2656	93.6066	2656	91.7755	2656	93.8111
2655	91.9218	2655	90.8518	2655	90.0638	2655	93.6015	2655	91.7723	2655	93.8096
2654	91.9306	2654	90.8523	2654	90.0501	2654	93.6107	2654	91.7763	2654	93.7867
2653	91.9429	2653	90.8605	2653	90.04	2653	93.6117	2653	91.7781	2653	93.7799
2652	91.9398	2652	90.8689	2652	90.045	2652	93.6112	2652	91.7864	2652	93.7883
2651	91.9465	2651	90.8693	2651	90.0671	2651	93.6261	2651	91.7988	2651	93.8062
2650	91.9367	2650	90.8599	2650	90.0758	2650	93.6279	2650	91.7975	2650	93.8075
2649	91.9265	2649	90.8688	2649	90.0753	2649	93.6186	2649	91.7996	2649	93.8033
2648	91.9465	2648	90.8883	2648	90.0802	2648	93.624	2648	91.8138	2648	93.8109
2647	91.9607	2647	90.8843	2647	90.075	2647	93.6271	2647	91.8129	2647	93.8047
2646	91.96	2646	90.8758	2646	90.0897	2646	93.6307	2646	91.8101	2646	93.7993
2645	91.9592	2645	90.8757	2645	90.1008	2645	93.6403	2645	91.8221	2645	93.8056
2644	91.9665	2644	90.8853	2644	90.0987	2644	93.648	2644	91.8341	2644	93.8091
2643	91.9757	2643	90.8957	2643	90.1063	2643	93.6553	2643	91.8322	2643	93.8008
2642	91.9752	2642	90.9029	2642	90.1121	2642	93.6571	2642	91.8306	2642	93.7957
2641	91.9645	2641	90.8937	2641	90.0998	2641	93.653	2641	91.8243	2641	93.7919
2640	91.9652	2640	90.8914	2640	90.0964	2640	93.6579	2640	91.8244	2640	93.8035
2639	91.9897	2639	90.902	2639	90.1119	2639	93.6635	2639	91.8375	2639	93.8185
2638	91.9918	2638	90.9092	2638	90.1157	2638	93.665	2638	91.8367	2638	93.8132
2637	91.9869	2637	90.9065	2637	90.1173	2637	93.6658	2637	91.8427	2637	93.806
2636	91.9976	2636	90.9153	2636	90.1244	2636	93.6749	2636	91.8539	2636	93.8152
2635	91.9989	2635	90.9328	2635	90.1304	2635	93.679	2635	91.8516	2635	93.8326
2634	91.9964	2634	90.9244	2634	90.1258	2634	93.6712	2634	91.847	2634	93.8287
2633	91.9878	2633	90.9077	2633	90.1118	2633	93.6573	2633	91.8445	2633	93.8122
2632	91.9809	2632	90.9012	2632	90.108	2632	93.6614	2632	91.854	2632	93.8159
2631	92.001	2631	90.9096	2631	90.1133	2631	93.6816	2631	91.8621	2631	93.8229
2630	92.0119	2630	90.9154	2630	90.1179	2630	93.6805	2630	91.8651	2630	93.8186
2629	92.0041	2629	90.922	2629	90.1237	2629	93.6803	2629	91.8725	2629	93.8136
2628	91.9961	2628	90.923	2628	90.1281	2628	93.6826	2628	91.8698	2628	93.806
2627	91.9982	2627	90.915	2627	90.1322	2627	93.681	2627	91.8628	2627	93.8187
2626	92.0071	2626	90.9189	2626	90.1257	2626	93.6808	2626	91.8671	2626	93.8196
2625	92.008	2625	90.9213	2625	90.1304	2625	93.6854	2625	91.8598	2625	93.8172
2624	92.0157	2624	90.9203	2624	90.1541	2624	93.6904	2624	91.8568	2624	93.8245
2623	92.0243	2623	90.9295	2623	90.1581	2623	93.6948	2623	91.8703	2623	93.8328
2622	92.0148	2622	90.93	2622	90.145	2622	93.6955	2622	91.8726	2622	93.8356
2621	91.9922	2621	90.9168	2621	90.1381	2621	93.691	2621	91.869	2621	93.8152
2620	91.9972	2620	90.9117	2620	90.1302	2620	93.6868	2620	91.8753	2620	93.8057
2619	92.0289	2619	90.9284	2619	90.1428	2619	93.7002	2619	91.8915	2619	93.8164
2618	92.0344	2618	90.9454	2618	90.1607	2618	93.7069	2618	91.894	2618	93.8318
2617	92.0247	2617	90.9463	2617	90.1513	2617	93.7067	2617	91.8762	2617	93.8434
2616	92.0167	2616	90.9428	2616	90.1466	2616	93.6983	2616	91.8719	2616	93.8469
2615	92.0078	2615	90.9315	2615	90.1448	2615	93.7073	2615	91.8748	2615	93.8346
2614	92.0199	2614	90.93	2614	90.1422	2614	93.7258	2614	91.8794	2614	93.8321
2613	92.0495	2613	90.9524	2613	90.1569	2613	93.7331	2613	91.8958	2613	93.8409
2612	92.0475	2612	90.9437	2612	90.1559	2612	93.7259	2612	91.9057	2612	93.836
2611	92.0202	2611	90.9317	2611	90.1448	2611	93.7097	2611	91.8977	2611	93.8319
2610	92.0178	2610	90.9374	2610	90.14	2610	93.6958	2610	91.8852	2610	93.8289
2609	92.0429	2609	90.9465	2609	90.1663	2609	93.7021	2609	91.8919	2609	93.8391
2608	92.0362	2608	90.95	2608	90.1769	2608	93.7173	2608	91.8894	2608	93.8504
2607	92.0138	2607	90.9446	2607	90.1569	2607	93.721	2607	91.8777	2607	93.8437
2606	92.0166	2606	90.9549	2606	90.1519	2606	93.7188	2606	91.8858	2606	93.8417
2605	92.0356	2605	90.9585	2605	90.1487	2605	93.7311	2605	91.8978	2605	93.8498
2604	92.0375	2604	90.9386	2604	90.143	2604	93.737	2604	91.9039	2604	93.849
2603	92.0229	2603	90.9408	2603	90.1462	2603	93.7225	2603	91.8876	2603	93.8423
2602	92.0203	2602	90.9381	2602	90.1504	2602	93.7134	2602	91.8612	2602	93.8323
2601	92.0209	2601	90.9215	2601	90.1377	2601	93.7116	2601	91.8556	2601	93.8252
2600	92.0176	2600	90.9215	2600	90.126	2600	93.7191	2600	91.8532	2600	93.8218
2599	92.0235	2599	90.9454	2599	90.1212	2599	93.7211	2599	91.8579	2599	93.8198
2598	92.0333	2598	90.9451	2598	90.1138	2598	93.6974	2598	91.8609	2598	93.8128
2597	92.0317	2597	90.9289	2597	90.117	2597	93.6839	2597	91.8471	2597	93.8007
2596	92.0074	2596	90.9146	2596	90.1174	2596	93.6821	2596	91.8496	2596	93.8058
2595	92.0036	2595	90.9095	2595	90.1175	2595	93.6849	2595	91.8569	2595	93.8009
2594	92.0199	2594	90.9115	2594	90.1132	2594	93.682	2594	91.8566	2594	93.8011
2593	92.0133	2593	90.9088	2593	90.1178	2593	93.6817	2593	91.8625	2593	93.8138
2592	91.9991	2592	90.9028	2592	90.1084	2592	93.6735	2592	91.8467	2592	93.8001
2591	91.9924	2591	90.9017	2591	90.0857	2591	93.6728	2591	91.82	2591	93.7887
2590	92.0071	2590	90.9156	2590	90.0845	2590	93.6971	2590	91.8245	2590	93.8029
2589	92.0218	2589	90.9264	2589	90.1014	2589	93.6907	2589	91.8341	2589	93.8066
2588	92.0164	2588	90.9061	2588	90.1068	2588	93.6512	2588	91.8308	2588	93.7993
2587	91.9927	2587	90.8764	2587	90.0907	2587	93.6524	2587	91.8135	2587	93.7901
2586	91.9887	2586	90.8672	2586	90.0779	2586	93.6705	2586	91.8193	2586	93.789
2585	92.0057	2585	90.8888	2585	90.0697	2585	93.6581	2585	91.828	2585	93.7785
2584	92.0021	2584	90.8904	2584	90.075	2584	93.6406	2584	91.8176	2584	93.7711
2583	91.9935	2583	90.8811	2583	90.0779	2583	93.6402	2583	91.7983	2583	93.7749
2582	91.9899	2582	90.8767	2582	90.0747	2582	93.6573	2582	91.7909	2582	93.7739
2581	91.9956	2581	90.8782	2581	90.0626	2581	93.6694	2581	91.8147	2581	93.7828
2580	92.0054	2580	90.9012	2580	90.0778	2580	93.6629	2580	91.829	2580	93.8056
2579	92.0069	2579	90.9042	2579	90.1047	2579	93.6649	2579	91.8196	2579	93.8143
2578	92.0178	2578	90.9121	2578	90.1167	2578	93.6686	2578	91.8281	2578	93.8315
2577	92.0209	2577	90.925	2577	90.1015	2577	93.656	2577	91.8266	2577	93.8372
2576	92.004	2576	90.8954	2576	90.0809	2576	93.6414	2576	91.8113	2576	93.8106
2575	91.9937	2575	90.8531	2575	90.0484	2575	93.6293	2575	91.798	2575	93.7805
2574	91.9925	2574	90.8554	2574	90.0402	2574	93.6373	2574	91.8057	2574	93.766
2573	91.9828	2573	90.8687	2573	90.0666	2573	93.6508	2573	91.8168	2573	93.757
2572	91.9777	2572	90.8819	2572	90.0844	2572	93.6578	2572	91.8206	2572	93.7704
2571	91.9783	2571	90.8885	2571	90.0691	2571	93.6557	2571	91.8279	2571	93.7799
2570	91.9993	2570	90.8794	2570	90.071	2570	93.6498	2570	91.8236	2570	93.7839
2569	92.0282	2569	90.8741	2569	90.0966	2569	93.6554	2569	91.8257	2569	93.8066
2568	92.0383	2568	90.8986	2568	90.0964	2568	93.6638	2568	91.8387	2568	93.8272
2567	92.0022	2567	90.8987	2567	90.0552	2567	93.6678	2567	91.8169	2567	93.8054
2566	91.9539	2566	90.8649	2566	90.0333	2566	93.6523	2566	91.781	2566	93.7607
2565	91.9546	2565	90.8486	2565	90.032	2565	93.6258	2565	91.7761	2565	93.7461
2564	91.9871	2564	90.8735	2564	90.0568	2564	93.6388	2564	91.7959	2564	93.7688
2563	91.9836	2563	90.8788	2563	90.0649	2563	93.6488	2563	91.8206	2563	93.7833
2562	91.9579	2562	90.8702	2562	90.0547	2562	93.6381	2562	91.818	2562	93.7768
2561	91.948	2561	90.8623	2561	90.0578	2561	93.6385	2561	91.7976	2561	93.7761
2560	91.9657	2560	90.8547	2560	90.0536	2560	93.6403	2560	91.7874	2560	93.7821
2559	91.9807	2559	90.8557	2559	90.0474	2559	93.6419	2559	91.7775	2559	93.7852
2558	91.9804	2558	90.8658	2558	90.0622	2558	93.6473	2558	91.7679	2558	93.7908
2557	91.9703	2557	90.8686	2557	90.0788	2557	93.6743	2557	91.7985	2557	93.8067
2556	91.977	2556	90.8758	2556	90.1033	2556	93.6727	2556	91.8188	2556	93.8177
2555	91.9902	2555	90.8668	2555	90.088	2555	93.6598	2555	91.8124	2555	93.7914
2554	91.9991	2554	90.8744	2554	90.0651	2554	93.6738	2554	91.8304	2554	93.8006
2553	91.9775	2553	90.8903	2553	90.0659	2553	93.6796	2553	91.8113	2553	93.8185
2552	91.9559	2552	90.878	2552	90.0553	2552	93.66	2552	91.7897	2552	93.7997
2551	91.9615	2551	90.8641	2551	90.0462	2551	93.6445	2551	91.7952	2551	93.7785
2550	91.972	2550	90.8423	2550	90.0478	2550	93.6475	2550	91.7785	2550	93.7709
2549	91.9715	2549	90.8449	2549	90.0614	2549	93.6658	2549	91.7947	2549	93.7893
2548	91.9561	2548	90.8539	2548	90.0573	2548	93.6531	2548	91.8063	2548	93.7891
2547	91.9389	2547	90.8269	2547	90.0274	2547	93.6137	2547	91.776	2547	93.7667
2546	91.9381	2546	90.8167	2546	90.0337	2546	93.6269	2546	91.7662	2546	93.7772
2545	91.9653	2545	90.8579	2545	90.0699	2545	93.6627	2545	91.7989	2545	93.8008
2544	91.9773	2544	90.8692	2544	90.0786	2544	93.6625	2544	91.8044	2544	93.7946
2543	91.9649	2543	90.8429	2543	90.0567	2543	93.6351	2543	91.7913	2543	93.7751
2542	91.9461	2542	90.8365	2542	90.0598	2542	93.629	2542	91.7945	2542	93.7824
2541	91.946	2541	90.8584	2541	90.067	2541	93.6531	2541	91.8033	2541	93.802
2540	91.9581	2540	90.849	2540	90.0598	2540	93.6592	2540	91.7952	2540	93.7939
2539	91.9574	2539	90.8289	2539	90.0473	2539	93.6547	2539	91.7802	2539	93.7895
2538	91.9529	2538	90.8463	2538	90.0527	2538	93.6583	2538	91.7915	2538	93.8137
2537	91.9489	2537	90.8371	2537	90.0693	2537	93.6499	2537	91.794	2537	93.8073
2536	91.9591	2536	90.8124	2536	90.067	2536	93.6463	2536	91.7837	2536	93.7876
2535	91.9705	2535	90.8309	2535	90.0438	2535	93.6536	2535	91.7732	2535	93.7751
2534	91.9613	2534	90.8415	2534	90.0347	2534	93.6485	2534	91.7718	2534	93.7834
2533	91.9488	2533	90.8262	2533	90.0281	2533	93.6482	2533	91.7829	2533	93.7838
2532	91.9583	2532	90.8351	2532	90.0373	2532	93.6751	2532	91.7874	2532	93.7963
2531	91.9499	2531	90.8496	2531	90.0596	2531	93.6904	2531	91.7757	2531	93.8024
2530	91.9301	2530	90.8403	2530	90.0604	2530	93.6757	2530	91.785	2530	93.7879
2529	91.9287	2529	90.826	2529	90.0437	2529	93.6507	2529	91.7902	2529	93.778
2528	91.9345	2528	90.8218	2528	90.0261	2528	93.6323	2528	91.7654	2528	93.7714
2527	91.9355	2527	90.8256	2527	90.0301	2527	93.6284	2527	91.7617	2527	93.7576
2526	91.9258	2526	90.8296	2526	90.0331	2526	93.6415	2526	91.7758	2526	93.752
2525	91.9273	2525	90.8132	2525	90.0261	2525	93.6558	2525	91.7715	2525	93.7754
2524	91.9427	2524	90.7927	2524	90.0311	2524	93.6563	2524	91.7557	2524	93.7895
2523	91.934	2523	90.789	2523	90.0196	2523	93.6377	2523	91.757	2523	93.782
2522	91.9044	2522	90.8049	2522	90.0181	2522	93.6434	2522	91.7603	2522	93.778
2521	91.884	2521	90.8246	2521	90.0259	2521	93.656	2521	91.7567	2521	93.7852
2520	91.9044	2520	90.8349	2520	90.0256	2520	93.6423	2520	91.7623	2520	93.8011
2519	91.9218	2519	90.8502	2519	90.0284	2519	93.6387	2519	91.7724	2519	93.8033
2518	91.9243	2518	90.8461	2518	90.0238	2518	93.652	2518	91.7571	2518	93.7895
2517	91.9197	2517	90.8106	2517	90.0035	2517	93.6531	2517	91.7521	2517	93.7595
2516	91.9097	2516	90.7765	2516	90.0044	2516	93.636	2516	91.7593	2516	93.7343
2515	91.9262	2515	90.7958	2515	90.0128	2515	93.6343	2515	91.7675	2515	93.7586
2514	91.9428	2514	90.8038	2514	90.0104	2514	93.6399	2514	91.7668	2514	93.7901
2513	91.9347	2513	90.7818	2513	90.009	2513	93.6231	2513	91.7561	2513	93.7842
2512	91.9139	2512	90.7769	2512	90.0033	2512	93.6035	2512	91.7493	2512	93.753
2511	91.8943	2511	90.8027	2511	90.0024	2511	93.594	2511	91.7485	2511	93.7343
2510	91.8977	2510	90.81	2510	89.999	2510	93.6094	2510	91.7603	2510	93.7368
2509	91.9057	2509	90.7931	2509	89.9856	2509	93.6321	2509	91.7473	2509	93.7369
2508	91.9134	2508	90.7883	2508	89.9984	2508	93.6463	2508	91.7325	2508	93.7485
2507	91.9097	2507	90.783	2507	90.0043	2507	93.6528	2507	91.7316	2507	93.7507
2506	91.8892	2506	90.7765	2506	89.9943	2506	93.6348	2506	91.7341	2506	93.7344
2505	91.8863	2505	90.7683	2505	89.9961	2505	93.6079	2505	91.7257	2505	93.7243
2504	91.8952	2504	90.7737	2504	89.9981	2504	93.6077	2504	91.721	2504	93.7477
2503	91.8907	2503	90.7742	2503	89.9849	2503	93.6	2503	91.7267	2503	93.7593
2502	91.8834	2502	90.748	2502	89.9791	2502	93.6094	2502	91.731	2502	93.7228
2501	91.8639	2501	90.7281	2501	89.9626	2501	93.5997	2501	91.7181	2501	93.698
2500	91.8671	2500	90.7324	2500	89.9495	2500	93.578	2500	91.7122	2500	93.7099
2499	91.877	2499	90.7501	2499	89.9514	2499	93.5939	2499	91.7034	2499	93.7393
2498	91.8537	2498	90.7507	2498	89.9678	2498	93.6008	2498	91.6896	2498	93.7495
2497	91.8411	2497	90.7366	2497	89.9538	2497	93.5833	2497	91.6979	2497	93.7279
2496	91.858	2496	90.7412	2496	89.9549	2496	93.5906	2496	91.7106	2496	93.7167
2495	91.8662	2495	90.7348	2495	89.9665	2495	93.6106	2495	91.7076	2495	93.7152
2494	91.8692	2494	90.7225	2494	89.9563	2494	93.6025	2494	91.6979	2494	93.7185
2493	91.8544	2493	90.7142	2493	89.9445	2493	93.578	2493	91.6896	2493	93.709
2492	91.8191	2492	90.6999	2492	89.9388	2492	93.5555	2492	91.6815	2492	93.7092
2491	91.827	2491	90.7142	2491	89.9327	2491	93.5706	2491	91.6642	2491	93.7342
2490	91.8598	2490	90.7447	2490	89.9392	2490	93.5879	2490	91.6717	2490	93.7513
2489	91.8523	2489	90.7525	2489	89.942	2489	93.5853	2489	91.6798	2489	93.743
2488	91.8275	2488	90.7479	2488	89.9323	2488	93.5885	2488	91.6851	2488	93.7374
2487	91.8238	2487	90.7291	2487	89.9137	2487	93.5882	2487	91.683	2487	93.7349
2486	91.8369	2486	90.7034	2486	89.9051	2486	93.5926	2486	91.6773	2486	93.7266
2485	91.8519	2485	90.7028	2485	89.9223	2485	93.6025	2485	91.691	2485	93.7073
2484	91.8635	2484	90.7165	2484	89.927	2484	93.5828	2484	91.688	2484	93.6997
2483	91.8619	2483	90.7213	2483	89.9354	2483	93.5744	2483	91.6629	2483	93.7088
2482	91.8422	2482	90.7139	2482	89.9536	2482	93.5808	2482	91.6619	2482	93.7133
2481	91.8149	2481	90.6914	2481	89.9263	2481	93.5677	2481	91.6569	2481	93.7084
2480	91.8232	2480	90.6774	2480	89.8983	2480	93.5619	2480	91.6393	2480	93.705
2479	91.848	2479	90.6836	2479	89.9075	2479	93.563	2479	91.6448	2479	93.7125
2478	91.8295	2478	90.686	2478	89.8884	2478	93.5541	2478	91.6434	2478	93.7143
2477	91.8165	2477	90.706	2477	89.8914	2477	93.5582	2477	91.6566	2477	93.7142
2476	91.8258	2476	90.718	2476	89.9165	2476	93.5516	2476	91.6708	2476	93.7079
2475	91.8244	2475	90.718	2475	89.9197	2475	93.5571	2475	91.6781	2475	93.7056
2474	91.8192	2474	90.7141	2474	89.8943	2474	93.5798	2474	91.664	2474	93.7021
2473	91.8071	2473	90.6862	2473	89.8748	2473	93.562	2473	91.6206	2473	93.6871
2472	91.7958	2472	90.6624	2472	89.8835	2472	93.5351	2472	91.6108	2472	93.6868
2471	91.8078	2471	90.6484	2471	89.8897	2471	93.5287	2471	91.6273	2471	93.702
2470	91.8319	2470	90.6565	2470	89.8846	2470	93.5342	2470	91.6316	2470	93.6992
2469	91.8313	2469	90.6659	2469	89.883	2469	93.5554	2469	91.6189	2469	93.6999
2468	91.7912	2468	90.6568	2468	89.8767	2468	93.5468	2468	91.6173	2468	93.6968
2467	91.7774	2467	90.6526	2467	89.8555	2467	93.5087	2467	91.63	2467	93.6749
2466	91.7963	2466	90.6688	2466	89.8652	2466	93.5207	2466	91.6267	2466	93.6721
2465	91.7914	2465	90.666	2465	89.892	2465	93.5402	2465	91.6062	2465	93.6764
2464	91.7877	2464	90.653	2464	89.8955	2464	93.5466	2464	91.6196	2464	93.6965
2463	91.7762	2463	90.6402	2463	89.8652	2463	93.5382	2463	91.6295	2463	93.6899
2462	91.7747	2462	90.6412	2462	89.8416	2462	93.5335	2462	91.6145	2462	93.6634
2461	91.7949	2461	90.649	2461	89.8537	2461	93.539	2461	91.5985	2461	93.6703
2460	91.7876	2460	90.6517	2460	89.8693	2460	93.5222	2460	91.596	2460	93.6646
2459	91.7615	2459	90.6362	2459	89.8544	2459	93.4972	2459	91.5982	2459	93.6519
2458	91.7518	2458	90.6248	2458	89.8435	2458	93.4841	2458	91.6006	2458	93.6528
2457	91.7573	2457	90.6257	2457	89.8427	2457	93.4964	2457	91.5958	2457	93.6511
2456	91.7795	2456	90.6337	2456	89.8463	2456	93.499	2456	91.5806	2456	93.6535
2455	91.7691	2455	90.6258	2455	89.8347	2455	93.4977	2455	91.5667	2455	93.6368
2454	91.7573	2454	90.6285	2454	89.8331	2454	93.5095	2454	91.5704	2454	93.6228
2453	91.7636	2453	90.6321	2453	89.8305	2453	93.4984	2453	91.576	2453	93.6241
2452	91.7529	2452	90.6018	2452	89.8002	2452	93.4752	2452	91.5523	2452	93.6302
2451	91.7358	2451	90.5751	2451	89.7931	2451	93.4641	2451	91.5304	2451	93.6253
2450	91.7259	2450	90.5922	2450	89.8138	2450	93.4799	2450	91.5507	2450	93.629
2449	91.7263	2449	90.6145	2449	89.8084	2449	93.4917	2449	91.5653	2449	93.6322
2448	91.716	2448	90.6104	2448	89.7794	2448	93.484	2448	91.5725	2448	93.6268
2447	91.7082	2447	90.6057	2447	89.7825	2447	93.4723	2447	91.5616	2447	93.6132
2446	91.7249	2446	90.6131	2446	89.8319	2446	93.4942	2446	91.5727	2446	93.6223
2445	91.7284	2445	90.5965	2445	89.8455	2445	93.5088	2445	91.5786	2445	93.6254
2444	91.7215	2444	90.5722	2444	89.8155	2444	93.488	2444	91.5458	2444	93.6176
2443	91.7346	2443	90.5928	2443	89.8131	2443	93.4871	2443	91.5415	2443	93.6223
2442	91.732	2442	90.6146	2442	89.8154	2442	93.4866	2442	91.5549	2442	93.6213
2441	91.7219	2441	90.594	2441	89.7775	2441	93.4643	2441	91.5398	2441	93.6005
2440	91.7463	2440	90.5946	2440	89.7684	2440	93.4623	2440	91.5347	2440	93.6051
2439	91.7508	2439	90.5959	2439	89.7902	2439	93.4615	2439	91.5248	2439	93.6063
2438	91.7316	2438	90.5744	2438	89.7837	2438	93.4527	2438	91.5231	2438	93.5959
2437	91.7253	2437	90.5511	2437	89.7684	2437	93.4546	2437	91.5104	2437	93.607
2436	91.7277	2436	90.567	2436	89.7745	2436	93.459	2436	91.5123	2436	93.6181
2435	91.7347	2435	90.6029	2435	89.7891	2435	93.4696	2435	91.5365	2435	93.6423
2434	91.7305	2434	90.608	2434	89.7816	2434	93.4848	2434	91.5545	2434	93.6601
2433	91.7142	2433	90.5792	2433	89.7616	2433	93.467	2433	91.5523	2433	93.6193
2432	91.7338	2432	90.5866	2432	89.774	2432	93.4587	2432	91.5503	2432	93.6062
2431	91.7419	2431	90.5864	2431	89.7908	2431	93.4646	2431	91.5479	2431	93.6314
2430	91.7126	2430	90.5688	2430	89.7852	2430	93.4533	2430	91.5363	2430	93.626
2429	91.72	2429	90.5665	2429	89.7852	2429	93.4728	2429	91.5399	2429	93.6383
2428	91.718	2428	90.5767	2428	89.7775	2428	93.4675	2428	91.5336	2428	93.6366
2427	91.6932	2427	90.5822	2427	89.7577	2427	93.4604	2427	91.5315	2427	93.6137
2426	91.7108	2426	90.5759	2426	89.7649	2426	93.4801	2426	91.5364	2426	93.6089
2425	91.7118	2425	90.5623	2425	89.7699	2425	93.4564	2425	91.521	2425	93.602
2424	91.6921	2424	90.565	2424	89.7612	2424	93.4369	2424	91.5179	2424	93.6037
2423	91.6945	2423	90.5655	2423	89.7597	2423	93.4453	2423	91.5364	2423	93.6211
2422	91.6912	2422	90.5583	2422	89.7656	2422	93.4604	2422	91.5462	2422	93.6371
2421	91.6858	2421	90.5575	2421	89.7589	2421	93.4775	2421	91.5322	2421	93.6402
2420	91.691	2420	90.5442	2420	89.7508	2420	93.4708	2420	91.5084	2420	93.6208
2419	91.6906	2419	90.555	2419	89.7491	2419	93.4492	2419	91.5192	2419	93.6127
2418	91.6916	2418	90.5589	2418	89.7283	2418	93.4229	2418	91.5268	2418	93.6055
2417	91.6985	2417	90.561	2417	89.727	2417	93.4335	2417	91.5267	2417	93.6066
2416	91.6982	2416	90.558	2416	89.7465	2416	93.4525	2416	91.5149	2416	93.6068
2415	91.6969	2415	90.5523	2415	89.7589	2415	93.4523	2415	91.5191	2415	93.5989
2414	91.6901	2414	90.538	2414	89.7478	2414	93.4449	2414	91.5111	2414	93.6065
2413	91.6899	2413	90.54	2413	89.7255	2413	93.4582	2413	91.4869	2413	93.6204
2412	91.6875	2412	90.5341	2412	89.7194	2412	93.4593	2412	91.4822	2412	93.6142
2411	91.6786	2411	90.5355	2411	89.7228	2411	93.4597	2411	91.496	2411	93.5966
2410	91.6807	2410	90.534	2410	89.7363	2410	93.4571	2410	91.5026	2410	93.5779
2409	91.6789	2409	90.5147	2409	89.747	2409	93.4447	2409	91.4803	2409	93.5783
2408	91.6922	2408	90.5432	2408	89.7486	2408	93.4503	2408	91.4938	2408	93.5916
2407	91.6814	2407	90.5528	2407	89.7398	2407	93.4628	2407	91.5129	2407	93.6041
2406	91.6524	2406	90.5179	2406	89.7289	2406	93.4623	2406	91.5113	2406	93.6035
2405	91.6503	2405	90.5046	2405	89.7048	2405	93.4464	2405	91.4968	2405	93.5929
2404	91.6655	2404	90.5284	2404	89.7026	2404	93.4472	2404	91.4853	2404	93.5869
2403	91.6536	2403	90.5373	2403	89.715	2403	93.455	2403	91.4874	2403	93.597
2402	91.6595	2402	90.5088	2402	89.7173	2402	93.4494	2402	91.4739	2402	93.5891
2401	91.6712	2401	90.4839	2401	89.7118	2401	93.4368	2401	91.4725	2401	93.5846
2400	91.6614	2400	90.4962	2400	89.7019	2400	93.435	2400	91.4825	2400	93.5855
2399	91.6667	2399	90.5099	2399	89.7026	2399	93.4456	2399	91.488	2399	93.5874
2398	91.6515	2398	90.4977	2398	89.6972	2398	93.4502	2398	91.4652	2398	93.5819
2397	91.6412	2397	90.5001	2397	89.701	2397	93.4616	2397	91.4463	2397	93.5766
2396	91.6604	2396	90.5116	2396	89.7024	2396	93.4515	2396	91.4566	2396	93.5896
2395	91.638	2395	90.4938	2395	89.6772	2395	93.4217	2395	91.4625	2395	93.5763
2394	91.6088	2394	90.471	2394	89.6627	2394	93.4212	2394	91.4433	2394	93.541
2393	91.6189	2393	90.4657	2393	89.6725	2393	93.4284	2393	91.4449	2393	93.5355
2392	91.6309	2392	90.4575	2392	89.6838	2392	93.4191	2392	91.4507	2392	93.5497
2391	91.617	2391	90.4482	2391	89.6835	2391	93.4165	2391	91.4399	2391	93.5669
2390	91.6127	2390	90.4511	2390	89.6786	2390	93.4214	2390	91.4355	2390	93.569
2389	91.6178	2389	90.4703	2389	89.6721	2389	93.4179	2389	91.4362	2389	93.5626
2388	91.63	2388	90.4782	2388	89.667	2388	93.4237	2388	91.4469	2388	93.5626
2387	91.61	2387	90.4577	2387	89.6591	2387	93.4133	2387	91.4433	2387	93.5526
2386	91.5939	2386	90.4353	2386	89.6628	2386	93.396	2386	91.4361	2386	93.5688
2385	91.5985	2385	90.4288	2385	89.6716	2385	93.3906	2385	91.4456	2385	93.5873
2384	91.6072	2384	90.4103	2384	89.6717	2384	93.3834	2384	91.4382	2384	93.5835
2383	91.6143	2383	90.4006	2383	89.6709	2383	93.3793	2383	91.4236	2383	93.5774
2382	91.6254	2382	90.4019	2382	89.6735	2382	93.3699	2382	91.4287	2382	93.5768
2381	91.6339	2381	90.4136	2381	89.6924	2381	93.3789	2381	91.459	2381	93.6186
2380	91.6464	2380	90.4243	2380	89.6976	2380	93.3896	2380	91.4701	2380	93.6468
2379	91.6646	2379	90.4085	2379	89.6956	2379	93.4012	2379	91.4478	2379	93.6372
2378	91.642	2378	90.3894	2378	89.6927	2378	93.3823	2378	91.4369	2378	93.6257
2377	91.6146	2377	90.3792	2377	89.6689	2377	93.3635	2377	91.4489	2377	93.609
2376	91.6198	2376	90.3621	2376	89.6571	2376	93.3601	2376	91.4534	2376	93.59
2375	91.6394	2375	90.3433	2375	89.6555	2375	93.3507	2375	91.4376	2375	93.5944
2374	91.6321	2374	90.3268	2374	89.6524	2374	93.3433	2374	91.4396	2374	93.6177
2373	91.6253	2373	90.3565	2373	89.661	2373	93.3496	2373	91.47	2373	93.6253
2372	91.6574	2372	90.3584	2372	89.661	2372	93.3489	2372	91.4759	2372	93.6578
2371	91.6495	2371	90.3497	2371	89.6766	2371	93.3315	2371	91.4463	2371	93.6772
2370	91.6345	2370	90.3492	2370	89.6745	2370	93.3208	2370	91.4299	2370	93.6472
2369	91.6604	2369	90.3483	2369	89.6385	2369	93.3293	2369	91.4465	2369	93.6327
2368	91.6785	2368	90.3685	2368	89.6534	2368	93.3324	2368	91.4796	2368	93.6576
2367	91.6561	2367	90.3736	2367	89.6841	2367	93.3106	2367	91.4748	2367	93.6585
2366	91.6566	2366	90.3429	2366	89.6669	2366	93.296	2366	91.4522	2366	93.6427
2365	91.6475	2365	90.3102	2365	89.6186	2365	93.2852	2365	91.4266	2365	93.6108
2364	91.6227	2364	90.292	2364	89.5948	2364	93.2327	2364	91.3917	2364	93.6097
2363	91.6076	2363	90.2911	2363	89.6166	2363	93.2221	2363	91.3945	2363	93.6387
2362	91.5805	2362	90.2773	2362	89.5911	2362	93.2339	2362	91.3873	2362	93.5936
2361	91.5867	2361	90.2683	2361	89.5601	2361	93.2552	2361	91.3457	2361	93.5653
2360	91.6261	2360	90.2835	2360	89.5631	2360	93.2533	2360	91.3299	2360	93.5701
2359	91.6271	2359	90.3023	2359	89.5346	2359	93.2193	2359	91.3212	2359	93.5422
2358	91.6026	2358	90.2821	2358	89.5081	2358	93.1956	2358	91.2944	2358	93.5198
2357	91.5897	2357	90.2652	2357	89.522	2357	93.2236	2357	91.2922	2357	93.5414
2356	91.5799	2356	90.2668	2356	89.529	2356	93.2439	2356	91.2916	2356	93.5433
2355	91.5822	2355	90.2633	2355	89.5122	2355	93.2424	2355	91.2757	2355	93.5159
2354	91.5544	2354	90.2248	2354	89.4594	2354	93.1613	2354	91.241	2354	93.4916
2353	91.521	2353	90.2139	2353	89.4165	2353	93.1417	2353	91.2369	2353	93.4732
2352	91.5348	2352	90.2163	2352	89.4394	2352	93.2121	2352	91.2583	2352	93.4657
2351	91.5441	2351	90.2755	2351	89.5116	2351	93.2829	2351	91.2782	2351	93.5013
2350	91.5547	2350	90.3001	2350	89.5343	2350	93.2828	2350	91.2859	2350	93.5326
2349	91.555	2349	90.2543	2349	89.4774	2349	93.2079	2349	91.2593	2349	93.5008
2348	91.5516	2348	90.1541	2348	89.3871	2348	93.1187	2348	91.2031	2348	93.4192
2347	91.57	2347	90.1638	2347	89.4005	2347	93.1563	2347	91.2114	2347	93.4338
2346	91.5827	2346	90.2417	2346	89.4603	2346	93.2111	2346	91.2475	2346	93.4869
2345	91.5693	2345	90.2604	2345	89.4644	2345	93.2245	2345	91.2451	2345	93.4808
2344	91.5636	2344	90.2338	2344	89.4713	2344	93.2103	2344	91.2456	2344	93.4717
2343	91.5506	2343	90.2018	2343	89.4841	2343	93.1979	2343	91.2476	2343	93.4719
2342	91.5204	2342	90.1702	2342	89.4477	2342	93.1611	2342	91.228	2342	93.4535
2341	91.4992	2341	90.1681	2341	89.4279	2341	93.1583	2341	91.2269	2341	93.429
2340	91.4879	2340	90.1611	2340	89.4346	2340	93.1564	2340	91.2162	2340	93.4247
2339	91.4875	2339	90.1795	2339	89.4471	2339	93.1639	2339	91.2352	2339	93.4325
2338	91.5021	2338	90.1464	2338	89.4029	2338	93.1251	2338	91.2167	2338	93.4148
2337	91.5105	2337	90.1846	2337	89.4335	2337	93.1552	2337	91.2327	2337	93.4537
2336	91.5316	2336	90.2279	2336	89.4827	2336	93.198	2336	91.281	2336	93.487
2335	91.5007	2335	90.2059	2335	89.4539	2335	93.1748	2335	91.2683	2335	93.4775
2334	91.4835	2334	90.1375	2334	89.4215	2334	93.1297	2334	91.227	2334	93.4453
2333	91.4745	2333	90.1345	2333	89.4218	2333	93.1414	2333	91.2219	2333	93.4554
2332	91.4582	2332	90.141	2332	89.4301	2332	93.1435	2332	91.2225	2332	93.4507
2331	91.4552	2331	90.1581	2331	89.4292	2331	93.1485	2331	91.2232	2331	93.4456
2330	91.4493	2330	90.1501	2330	89.3902	2330	93.141	2330	91.1932	2330	93.4263
2329	91.4147	2329	90.128	2329	89.4045	2329	93.1275	2329	91.1847	2329	93.4226
2328	91.4011	2328	90.1002	2328	89.4098	2328	93.0975	2328	91.1939	2328	93.4416
2327	91.3992	2327	90.0657	2327	89.3843	2327	93.0849	2327	91.1768	2327	93.4318
2326	91.3328	2326	90.0012	2326	89.3032	2326	93.0107	2326	91.1019	2326	93.3354
2325	91.2432	2325	89.9108	2325	89.2333	2325	92.8988	2325	91.007	2325	93.2189
2324	91.2542	2324	89.9403	2324	89.2606	2324	92.8916	2324	91.0328	2324	93.224
2323	91.319	2323	89.9803	2323	89.2999	2323	92.9606	2323	91.0818	2323	93.2836
2322	91.3441	2322	90.0501	2322	89.3374	2322	93.0227	2322	91.1158	2322	93.3641
2321	91.3645	2321	90.0445	2321	89.3623	2321	93.0389	2321	91.1251	2321	93.3791
2320	91.3473	2320	90.0311	2320	89.3651	2320	93.0429	2320	91.1322	2320	93.3619
2319	91.3565	2319	90.0155	2319	89.3608	2319	93.053	2319	91.1319	2319	93.3388
2318	91.375	2318	90.0849	2318	89.3933	2318	93.0824	2318	91.1687	2318	93.3753
2317	91.3566	2317	90.0178	2317	89.3543	2317	93.0495	2317	91.1357	2317	93.337
2316	91.3281	2316	90.0315	2316	89.3458	2316	93.0462	2316	91.1235	2316	93.3315
2315	91.3653	2315	90.0242	2315	89.3569	2315	93.0652	2315	91.1281	2315	93.3201
2314	91.3857	2314	90.0806	2314	89.3864	2314	93.1209	2314	91.1835	2314	93.3603
2313	91.3887	2313	90.086	2313	89.3926	2313	93.1054	2313	91.1764	2313	93.3545
2312	91.3862	2312	90.1232	2312	89.3846	2312	93.1059	2312	91.1757	2312	93.3601
2311	91.4198	2311	90.0796	2311	89.3826	2311	93.1125	2311	91.1746	2311	93.3427
2310	91.3918	2310	90.0843	2310	89.3789	2310	93.1175	2310	91.1789	2310	93.353
2309	91.3937	2309	90.0421	2309	89.352	2309	93.0856	2309	91.1521	2309	93.3428
2308	91.4011	2308	90.0938	2308	89.3813	2308	93.1207	2308	91.166	2308	93.3834
2307	91.4045	2307	90.0956	2307	89.3833	2307	93.1248	2307	91.1659	2307	93.3715
2306	91.393	2306	90.1142	2306	89.4029	2306	93.1552	2306	91.1683	2306	93.3619
2305	91.362	2305	90.0921	2305	89.3857	2305	93.1299	2305	91.1433	2305	93.3286
2304	91.3775	2304	90.1471	2304	89.4019	2304	93.1612	2304	91.1673	2304	93.3559
2303	91.3903	2303	90.1038	2303	89.3679	2303	93.1323	2303	91.1539	2303	93.3555
2302	91.3994	2302	90.0989	2302	89.3784	2302	93.141	2302	91.1739	2302	93.3461
2301	91.392	2301	90.1229	2301	89.3773	2301	93.1227	2301	91.1726	2301	93.3354
2300	91.3571	2300	90.1387	2300	89.3793	2300	93.1468	2300	91.157	2300	93.3257
2299	91.3437	2299	90.1307	2299	89.3597	2299	93.134	2299	91.14	2299	93.3183
2298	91.3607	2298	90.1088	2298	89.3723	2298	93.1233	2298	91.1351	2298	93.3018
2297	91.3387	2297	90.0812	2297	89.3515	2297	93.1162	2297	91.1171	2297	93.2694
2296	91.3309	2296	90.0839	2296	89.3467	2296	93.1449	2296	91.1178	2296	93.2721
2295	91.3546	2295	90.1328	2295	89.3538	2295	93.154	2295	91.1345	2295	93.3046
2294	91.3367	2294	90.1353	2294	89.3166	2294	93.1148	2294	91.1186	2294	93.2962
2293	91.3159	2293	90.1034	2293	89.2998	2293	93.1064	2293	91.1067	2293	93.2717
2292	91.3143	2292	90.0918	2292	89.302	2292	93.109	2292	91.1127	2292	93.2625
2291	91.3379	2291	90.1291	2291	89.2977	2291	93.1199	2291	91.1103	2291	93.2666
2290	91.3173	2290	90.1263	2290	89.2848	2290	93.1323	2290	91.096	2290	93.2566
2289	91.2811	2289	90.1026	2289	89.2883	2289	93.1184	2289	91.0894	2289	93.2408
2288	91.2702	2288	90.0755	2288	89.2578	2288	93.0904	2288	91.0918	2288	93.2161
2287	91.2817	2287	90.0543	2287	89.2359	2287	93.0524	2287	91.0891	2287	93.1918
2286	91.3024	2286	90.0849	2286	89.251	2286	93.06	2286	91.0748	2286	93.2191
2285	91.295	2285	90.0945	2285	89.2586	2285	93.0763	2285	91.0691	2285	93.2207
2284	91.2917	2284	90.0768	2284	89.2483	2284	93.0883	2284	91.0722	2284	93.2046
2283	91.2885	2283	90.0543	2283	89.2359	2283	93.0748	2283	91.0614	2283	93.2046
2282	91.2768	2282	90.0647	2282	89.2222	2282	93.0488	2282	91.0576	2282	93.1849
2281	91.2934	2281	90.0907	2281	89.2252	2281	93.05	2281	91.0434	2281	93.1896
2280	91.3176	2280	90.1155	2280	89.244	2280	93.0993	2280	91.0545	2280	93.2188
2279	91.3325	2279	90.1132	2279	89.2487	2279	93.1214	2279	91.0692	2279	93.2277
2278	91.3336	2278	90.1383	2278	89.2845	2278	93.1314	2278	91.0656	2278	93.2347
2277	91.3131	2277	90.1514	2277	89.3089	2277	93.1265	2277	91.0756	2277	93.2308
2276	91.2826	2276	90.1308	2276	89.2758	2276	93.1051	2276	91.0845	2276	93.2182
2275	91.2728	2275	90.1236	2275	89.2433	2275	93.1178	2275	91.0769	2275	93.2255
2274	91.2858	2274	90.113	2274	89.2492	2274	93.1629	2274	91.0769	2274	93.2595
2273	91.3051	2273	90.1315	2273	89.2419	2273	93.153	2273	91.0645	2273	93.2629
2272	91.2893	2272	90.1358	2272	89.2311	2272	93.1312	2272	91.0722	2272	93.2524
2271	91.3011	2271	90.1389	2271	89.2507	2271	93.1488	2271	91.1099	2271	93.2635
2270	91.3172	2270	90.1125	2270	89.2317	2270	93.1162	2270	91.0963	2270	93.2467
2269	91.3468	2269	90.1078	2269	89.2303	2269	93.0987	2269	91.0941	2269	93.2432
2268	91.3626	2268	90.1266	2268	89.2424	2268	93.1149	2268	91.1365	2268	93.257
2267	91.337	2267	90.0983	2267	89.2314	2267	93.1205	2267	91.1358	2267	93.2212
2266	91.3001	2266	90.0967	2266	89.2098	2266	93.1433	2266	91.1167	2266	93.1905
2265	91.28	2265	90.0742	2265	89.1585	2265	93.1381	2265	91.0853	2265	93.1695
2264	91.3057	2264	90.0635	2264	89.1814	2264	93.1423	2264	91.0789	2264	93.1982
2263	91.3382	2263	90.1057	2263	89.2365	2263	93.1605	2263	91.0978	2263	93.2347
2262	91.2869	2262	90.0893	2262	89.1831	2262	93.129	2262	91.0838	2262	93.2196
2261	91.2866	2261	90.0595	2261	89.1366	2261	93.0845	2261	91.0811	2261	93.1777
2260	91.3258	2260	90.0564	2260	89.1569	2260	93.0833	2260	91.0742	2260	93.152
2259	91.3141	2259	90.0077	2259	89.1817	2259	93.0938	2259	91.0728	2259	93.166
2258	91.298	2258	89.9942	2258	89.1724	2258	93.1166	2258	91.0709	2258	93.2248
2257	91.2888	2257	90.0188	2257	89.161	2257	93.1427	2257	91.0522	2257	93.2419
2256	91.3038	2256	90.0641	2256	89.1906	2256	93.1284	2256	91.0612	2256	93.2573
2255	91.3054	2255	90.1076	2255	89.1882	2255	93.0998	2255	91.0555	2255	93.2644
2254	91.3181	2254	90.1411	2254	89.1951	2254	93.1457	2254	91.1105	2254	93.2411
2253	91.3333	2253	90.1481	2253	89.1962	2253	93.1636	2253	91.1077	2253	93.2431
2252	91.2938	2252	90.0784	2252	89.1467	2252	93.116	2252	91.0437	2252	93.2362
2251	91.2776	2251	90.0417	2251	89.1281	2251	93.0776	2251	91.0509	2251	93.231
2250	91.2298	2250	90.0291	2250	89.1153	2250	93.0349	2250	91.0273	2250	93.1679
2249	91.2114	2249	90.0399	2249	89.1331	2249	93.0305	2249	91.0461	2249	93.1463
2248	91.2944	2248	90.0735	2248	89.2043	2248	93.0797	2248	91.1102	2248	93.2122
2247	91.3345	2247	90.0819	2247	89.2597	2247	93.1155	2247	91.1062	2247	93.2529
2246	91.2915	2246	90.0803	2246	89.2186	2246	93.1222	2246	91.0447	2246	93.2057
2245	91.2459	2245	90.0641	2245	89.1546	2245	93.0901	2245	91.0073	2245	93.1408
2244	91.2494	2244	90.055	2244	89.1521	2244	93.0951	2244	91.0445	2244	93.1757
2243	91.2614	2243	90.012	2243	89.1455	2243	93.0881	2243	90.998	2243	93.2046
2242	91.2317	2242	89.9776	2242	89.1363	2242	93.1127	2242	90.9314	2242	93.1798
2241	91.21	2241	90.0118	2241	89.1072	2241	93.1099	2241	90.9551	2241	93.1508
2240	91.2985	2240	90.0956	2240	89.1226	2240	93.1246	2240	91.023	2240	93.1999
2239	91.2801	2239	90.0529	2239	89.1533	2239	93.0964	2239	90.974	2239	93.1936
2238	91.2066	2238	90.0005	2238	89.121	2238	93.0692	2238	90.9534	2238	93.1421
2237	91.2548	2237	90.0369	2237	89.1222	2237	93.1054	2237	91.0517	2237	93.1513
2236	91.2251	2236	90.0347	2236	89.1047	2236	93.105	2236	91.0552	2236	93.1851
2235	91.187	2235	90.0365	2235	89.0599	2235	93.0556	2235	90.9852	2235	93.1824
2234	91.2414	2234	90.0171	2234	89.0946	2234	93.0342	2234	90.9972	2234	93.1927
2233	91.2506	2233	89.9474	2233	89.1131	2233	93.071	2233	91.0272	2233	93.1912
2232	91.1838	2232	89.9399	2232	89.0839	2232	93.0783	2232	90.9853	2232	93.1671
2231	91.175	2231	89.9978	2231	89.0821	2231	93.0644	2231	90.9852	2231	93.1671
2230	91.215	2230	90.0237	2230	89.1056	2230	93.0798	2230	91.0368	2230	93.1926
2229	91.2417	2229	89.9966	2229	89.1051	2229	93.0889	2229	90.9891	2229	93.1663
2228	91.3129	2228	90.0062	2228	89.1092	2228	93.1156	2228	90.9676	2228	93.157
2227	91.3473	2227	90.0426	2227	89.1067	2227	93.1016	2227	91.0354	2227	93.1859
2226	91.2724	2226	90.0341	2226	89.113	2226	93.076	2226	91.0995	2226	93.2016
2225	91.3001	2225	90.0307	2225	89.1515	2225	93.0889	2225	91.0614	2225	93.2037
2224	91.3462	2224	90.0326	2224	89.1262	2224	93.0907	2224	91.0168	2224	93.1522
2223	91.2935	2223	89.9637	2223	89.0487	2223	93.1045	2223	90.9913	2223	93.1545
2222	91.2693	2222	89.9549	2222	89.0729	2222	93.1021	2222	90.993	2222	93.2225
2221	91.2661	2221	90.035	2221	89.1472	2221	93.0819	2221	90.9895	2221	93.1899
2220	91.2256	2220	90.0625	2220	89.1467	2220	93.1437	2220	91.047	2220	93.1977
2219	91.1842	2219	90.024	2219	89.0339	2219	93.1013	2219	91.047	2219	93.1922
2218	91.2125	2218	90.0067	2218	89.0063	2218	93.0783	2218	91.0077	2218	93.1919
2217	91.2651	2217	90.0414	2217	89.0787	2217	93.1591	2217	91.0285	2217	93.2517
2216	91.2494	2216	90.0249	2216	89.0509	2216	93.1452	2216	91.0208	2216	93.2522
2215	91.2109	2215	89.9999	2215	89.037	2215	93.1051	2215	90.9627	2215	93.1696
2214	91.2409	2214	90.0178	2214	89.0991	2214	93.1283	2214	91.0023	2214	93.1444
2213	91.2399	2213	90.0253	2213	89.0951	2213	93.1027	2213	91.0507	2213	93.1804
2212	91.1869	2212	90.0439	2212	89.0964	2212	93.0757	2212	91.0356	2212	93.1653
2211	91.1549	2211	89.9822	2211	89.0919	2211	93.0462	2211	90.9992	2211	93.088
2210	91.1483	2210	89.9502	2210	89.0357	2210	93.0278	2210	90.9275	2210	93.0786
2209	91.1641	2209	89.9663	2209	89.0268	2209	93.0687	2209	90.9387	2209	93.1619
2208	91.1778	2208	89.9265	2208	89.0844	2208	93.13	2208	91.0298	2208	93.191
2207	91.2036	2207	89.9447	2207	89.1175	2207	93.1284	2207	91.0597	2207	93.1315
2206	91.2433	2206	90.0073	2206	89.1069	2206	93.1063	2206	91.0215	2206	93.1253
2205	91.2775	2205	90.0348	2205	89.0391	2205	93.0819	2205	91.0535	2205	93.2009
2204	91.2556	2204	90.0606	2204	89.0408	2204	93.122	2204	91.113	2204	93.2692
2203	91.235	2203	90.0419	2203	89.1223	2203	93.103	2203	91.0582	2203	93.2531
2202	91.2464	2202	89.979	2202	89.1088	2202	93.0954	2202	90.9826	2202	93.2025
2201	91.1271	2201	89.9251	2201	88.9739	2201	93.0465	2201	90.9591	2201	93.1625
2200	91.1284	2200	89.9451	2200	88.98	2200	93.033	2200	90.9863	2200	93.1099
2199	91.1484	2199	89.9184	2199	88.9997	2199	92.9656	2199	90.8755	2199	92.9675
2198	91.1494	2198	89.8849	2198	89.0091	2198	92.9631	2198	90.8623	2198	93.0086
2197	91.2301	2197	89.9571	2197	89.0752	2197	93.0959	2197	91.0265	2197	93.1475
2196	91.2232	2196	90.0289	2196	89.0626	2196	93.1536	2196	91.0728	2196	93.1545
2195	91.1906	2195	90.0231	2195	88.9673	2195	93.1266	2195	90.9763	2195	93.1168
2194	91.1796	2194	90.0166	2194	88.9753	2194	93.1096	2194	90.9514	2194	93.1347
2193	91.1612	2193	90.0094	2193	89.0133	2193	93.1158	2193	90.9495	2193	93.1704
2192	91.1584	2192	89.9564	2192	88.9738	2192	93.1279	2192	90.9465	2192	93.164
2191	91.118	2191	89.9066	2191	88.9653	2191	93.131	2191	90.9157	2191	93.1519
2190	91.1274	2190	89.8827	2190	88.9472	2190	93.102	2190	90.882	2190	93.118
2189	91.1539	2189	89.8615	2189	88.9419	2189	93.0642	2189	90.8813	2189	93.0834
2188	91.109	2188	89.8952	2188	89.0158	2188	93.0695	2188	90.9205	2188	93.147
2187	91.0602	2187	89.8889	2187	88.972	2187	93.052	2187	90.9107	2187	93.0803
2186	91.0965	2186	89.8555	2186	88.9381	2186	93.0418	2186	90.9025	2186	92.9827
2185	91.1662	2185	89.915	2185	88.9684	2185	93.0386	2185	90.9182	2185	93.0754
2184	91.1656	2184	89.8772	2184	89.0047	2184	93.0705	2184	90.9345	2184	93.1055
2183	91.2318	2183	89.9132	2183	89.0209	2183	93.127	2183	90.9927	2183	93.1132
2182	91.2377	2182	89.9941	2182	89.0217	2182	93.1099	2182	91.053	2182	93.201
2181	91.0917	2181	89.8576	2181	89.0217	2181	93.0091	2181	91.0106	2181	93.1702
2180	91.0598	2180	89.791	2180	88.9382	2180	93.0286	2180	91.0094	2180	93.0881
2179	91.1287	2179	89.8265	2179	88.8596	2179	93.0278	2179	90.9514	2179	93.0772
2178	91.0631	2178	89.785	2178	88.8549	2178	92.9356	2178	90.8222	2178	93.041
2177	91.0997	2177	89.7539	2177	88.8935	2177	92.9411	2177	90.8564	2177	93.0137
2176	91.2266	2176	89.8418	2176	88.9411	2176	93.0025	2176	90.9155	2176	93.029
2175	91.2515	2175	89.9483	2175	89.0168	2175	93.0771	2175	90.9506	2175	93.1145
2174	91.2639	2174	89.9507	2174	89.0615	2174	93.1234	2174	91.0414	2174	93.1643
2173	91.199	2173	89.8646	2173	88.9421	2173	93.0355	2173	90.9692	2173	93.0913
2172	91.0581	2172	89.8073	2172	88.8333	2172	92.9952	2172	90.8488	2172	93.0551
2171	91.0548	2171	89.8388	2171	88.8239	2171	92.9828	2171	90.8177	2171	93.0262
2170	91.016	2170	89.8058	2170	88.8696	2170	92.9661	2170	90.763	2170	93.0014
2169	90.9765	2169	89.7813	2169	88.8182	2169	92.9023	2169	90.7499	2169	92.9735
2168	91.0243	2168	89.8111	2168	88.7796	2168	92.9013	2168	90.7768	2168	92.9893
2167	91.0319	2167	89.8736	2167	88.8558	2167	92.918	2167	90.7987	2167	92.9666
2166	90.9704	2166	89.8369	2166	88.878	2166	92.8682	2166	90.7517	2166	92.9211
2165	90.8971	2165	89.6835	2165	88.7492	2165	92.7885	2165	90.6523	2165	92.8921
2164	90.8271	2164	89.6455	2164	88.6524	2164	92.8014	2164	90.5777	2164	92.8134
2163	90.88	2163	89.7078	2163	88.658	2163	92.8983	2163	90.5607	2163	92.7419
2162	91.0135	2162	89.6446	2162	88.7002	2162	92.8592	2162	90.6946	2162	92.7753
2161	91.0684	2161	89.5167	2161	88.6467	2161	92.8016	2161	90.6713	2161	92.7987
2160	91.0993	2160	89.6536	2160	88.8535	2160	92.8892	2160	90.698	2160	92.967
2159	91.2517	2159	89.9158	2159	89.1433	2159	93.0324	2159	90.9703	2159	93.2678
2158	91.3348	2158	90.0252	2158	89.0908	2158	93.2578	2158	91.1314	2158	93.423
2157	91.2794	2157	90.0977	2157	89.0111	2157	93.4701	2157	91.262	2157	93.4244
2156	91.3118	2156	90.1065	2156	89.1226	2156	93.4696	2156	91.2942	2156	93.4166
2155	91.3844	2155	90.0474	2155	89.1432	2155	93.3603	2155	91.1615	2155	93.4065
2154	91.3357	2154	90.0086	2154	89.0424	2154	93.2677	2154	91.0102	2154	93.3393
2153	91.285	2153	90.0095	2153	88.9774	2153	93.2282	2153	90.8957	2153	93.2587
2152	91.2292	2152	90.0088	2152	88.9087	2152	93.2203	2152	90.8908	2152	93.1719
2151	91.1473	2151	89.9509	2151	88.8431	2151	93.1463	2151	90.8825	2151	93.1664
2150	91.0855	2150	89.925	2150	88.9049	2150	93.1036	2150	90.887	2150	93.2278
2149	91.1006	2149	90.0028	2149	88.912	2149	93.0774	2149	90.8844	2149	93.2068
2148	91.1842	2148	89.9448	2148	88.9155	2148	93.0585	2148	90.8717	2148	93.1281
2147	91.2412	2147	89.86	2147	88.8779	2147	93.0744	2147	90.8873	2147	93.0886
2146	91.2823	2146	89.9245	2146	88.8364	2146	93.1485	2146	90.9333	2146	93.1732
2145	91.2517	2145	89.9027	2145	88.8549	2145	93.1408	2145	90.8943	2145	93.2144
2144	91.191	2144	89.8747	2144	88.8581	2144	93.0748	2144	90.8622	2144	93.2057
2143	91.1516	2143	89.9328	2143	88.7922	2143	93.0033	2143	90.8438	2143	93.188
2142	91.1673	2142	89.9499	2142	88.8285	2142	93.0641	2142	90.8586	2142	93.2314
2141	91.1983	2141	89.9405	2141	88.9588	2141	93.131	2141	90.9158	2141	93.3129
2140	91.1464	2140	89.9326	2140	88.9665	2140	93.0798	2140	90.9391	2140	93.2189
2139	91.087	2139	89.9141	2139	88.8794	2139	92.9859	2139	90.9142	2139	93.0592
2138	91.131	2138	89.8803	2138	88.8586	2138	93.0419	2138	90.9233	2138	93.0983
2137	91.1995	2137	89.8956	2137	88.8898	2137	93.1219	2137	90.9261	2137	93.2091
2136	91.1325	2136	89.9315	2136	88.8907	2136	93.0909	2136	90.916	2136	93.1734
2135	91.1189	2135	89.9498	2135	88.8875	2135	93.0799	2135	90.924	2135	93.1808
2134	91.211	2134	89.9538	2134	88.945	2134	93.1412	2134	90.9376	2134	93.2609
2133	91.1859	2133	89.9093	2133	88.9301	2133	93.1497	2133	90.9326	2133	93.1989
2132	91.0833	2132	89.8416	2132	88.8647	2132	93.0568	2132	90.8579	2132	93.1269
2131	91.0663	2131	89.8462	2131	88.8596	2131	93.03	2131	90.8526	2131	93.1031
2130	91.1211	2130	89.8749	2130	88.8707	2130	93.0293	2130	90.8953	2130	93.1004
2129	91.1144	2129	89.8437	2129	88.8434	2129	93.0038	2129	90.8585	2129	93.1167
2128	91.0879	2128	89.8019	2128	88.8674	2128	93.0314	2128	90.8465	2128	93.1424
2127	91.1052	2127	89.819	2127	88.9039	2127	93.0503	2127	90.8812	2127	93.1358
2126	91.1237	2126	89.8554	2126	88.8836	2126	93.0413	2126	90.8956	2126	93.0845
2125	91.1162	2125	89.8442	2125	88.8226	2125	93.0414	2125	90.866	2125	93.0612
2124	91.1216	2124	89.815	2124	88.7904	2124	93.0526	2124	90.8453	2124	93.0873
2123	91.1168	2123	89.8173	2123	88.7773	2123	93.0114	2123	90.8214	2123	93.0941
2122	91.0779	2122	89.8316	2122	88.7563	2122	92.9862	2122	90.8126	2122	93.1132
2121	91.0548	2121	89.8093	2121	88.7353	2121	93.0034	2121	90.7789	2121	93.1023
2120	91.0376	2120	89.7516	2120	88.7113	2120	92.981	2120	90.7597	2120	93.0084
2119	91.0322	2119	89.7324	2119	88.7301	2119	92.9686	2119	90.7474	2119	92.963
2118	91.009	2118	89.7364	2118	88.7307	2118	92.9467	2118	90.7181	2118	93.0248
2117	90.989	2117	89.7056	2117	88.7142	2117	92.8665	2117	90.6688	2117	93.0314
2116	90.9909	2116	89.7149	2116	88.7411	2116	92.8583	2116	90.6724	2116	93.0007
2115	90.9614	2115	89.6819	2115	88.7169	2115	92.8559	2115	90.6565	2115	92.9538
2114	90.9903	2114	89.67	2114	88.7452	2114	92.8893	2114	90.7064	2114	92.9931
2113	90.9822	2113	89.6785	2113	88.7462	2113	92.905	2113	90.7326	2113	93.0003
2112	90.9049	2112	89.6611	2112	88.6808	2112	92.8396	2112	90.6512	2112	92.9374
2111	90.8968	2111	89.6494	2111	88.6796	2111	92.8016	2111	90.6011	2111	92.9337
2110	90.95	2110	89.653	2110	88.7083	2110	92.8452	2110	90.6466	2110	92.9712
2109	90.9928	2109	89.6719	2109	88.7339	2109	92.8941	2109	90.6987	2109	93.0144
2108	90.9544	2108	89.682	2108	88.7419	2108	92.8711	2108	90.6699	2108	93.0023
2107	90.9431	2107	89.6779	2107	88.7559	2107	92.8341	2107	90.6561	2107	92.9783
2106	90.9809	2106	89.6747	2106	88.7566	2106	92.8669	2106	90.684	2106	93.0069
2105	90.9784	2105	89.6834	2105	88.742	2105	92.8957	2105	90.6985	2105	93.0443
2104	90.946	2104	89.6754	2104	88.7081	2104	92.8984	2104	90.6964	2104	93.0193
2103	90.9378	2103	89.6777	2103	88.6821	2103	92.898	2103	90.681	2103	92.9834
2102	90.9703	2102	89.6451	2102	88.6819	2102	92.8788	2102	90.6801	2102	92.9514
2101	90.9782	2101	89.6339	2101	88.6662	2101	92.8537	2101	90.6663	2101	92.9636
2100	90.9386	2100	89.6581	2100	88.6573	2100	92.8534	2100	90.668	2100	92.9571
2099	90.9545	2099	89.6826	2099	88.7066	2099	92.8888	2099	90.7112	2099	92.9435
2098	90.9674	2098	89.674	2098	88.7247	2098	92.894	2098	90.7244	2098	92.9771
2097	90.9319	2097	89.6469	2097	88.7125	2097	92.867	2097	90.6887	2097	92.9729
2096	90.9383	2096	89.6786	2096	88.7313	2096	92.8998	2096	90.7021	2096	93.0212
2095	90.9659	2095	89.7388	2095	88.737	2095	92.9713	2095	90.7499	2095	93.0696
2094	91.0027	2094	89.7352	2094	88.7512	2094	92.973	2094	90.7746	2094	93.0697
2093	90.9767	2093	89.6725	2093	88.7279	2093	92.8919	2093	90.7365	2093	93.0047
2092	90.903	2092	89.6542	2092	88.7187	2092	92.8819	2092	90.6738	2092	92.9753
2091	90.9044	2091	89.6699	2091	88.7448	2091	92.9452	2091	90.7003	2091	93.0031
2090	90.9346	2090	89.6736	2090	88.7385	2090	92.941	2090	90.7284	2090	93.01
2089	90.9185	2089	89.6915	2089	88.7378	2089	92.8935	2089	90.7103	2089	92.9934
2088	90.8944	2088	89.7429	2088	88.7675	2088	92.924	2088	90.7511	2088	93.0248
2087	90.9358	2087	89.7558	2087	88.7578	2087	92.961	2087	90.7734	2087	93.0488
2086	90.935	2086	89.6556	2086	88.6769	2086	92.9021	2086	90.6886	2086	92.9955
2085	90.8944	2085	89.5874	2085	88.6062	2085	92.8459	2085	90.5851	2085	92.924
2084	90.8791	2084	89.6418	2084	88.6429	2084	92.8573	2084	90.6236	2084	92.9067
2083	90.8592	2083	89.6141	2083	88.6783	2083	92.8471	2083	90.6709	2083	92.9071
2082	90.859	2082	89.5769	2082	88.6559	2082	92.8245	2082	90.6658	2082	92.9178
2081	90.8716	2081	89.6001	2081	88.6104	2081	92.8345	2081	90.6542	2081	92.9332
2080	90.8826	2080	89.6143	2080	88.6189	2080	92.834	2080	90.6337	2080	92.9671
2079	90.8707	2079	89.6281	2079	88.6704	2079	92.8463	2079	90.6246	2079	92.9532
2078	90.8669	2078	89.6542	2078	88.7086	2078	92.8848	2078	90.6558	2078	92.949
2077	90.8826	2077	89.634	2077	88.7153	2077	92.9064	2077	90.6229	2077	92.9643
2076	90.8667	2076	89.6162	2076	88.7113	2076	92.9121	2076	90.6365	2076	92.9594
2075	90.8246	2075	89.5905	2075	88.649	2075	92.8427	2075	90.6475	2075	92.9211
2074	90.8669	2074	89.6128	2074	88.6042	2074	92.8398	2074	90.6526	2074	92.9524
2073	90.8888	2073	89.6518	2073	88.6251	2073	92.8869	2073	90.6773	2073	92.988
2072	90.8611	2072	89.6291	2072	88.696	2072	92.9082	2072	90.6615	2072	92.9958
2071	90.87	2071	89.6307	2071	88.7345	2071	92.9021	2071	90.6469	2071	92.9737
2070	90.8916	2070	89.6767	2070	88.7072	2070	92.9094	2070	90.6658	2070	92.9238
2069	90.8805	2069	89.6761	2069	88.6672	2069	92.915	2069	90.6903	2069	92.9202
2068	90.829	2068	89.6075	2068	88.6453	2068	92.8994	2068	90.6474	2068	92.929
2067	90.8223	2067	89.5445	2067	88.6338	2067	92.8178	2067	90.618	2067	92.945
2066	90.8798	2066	89.5489	2066	88.6532	2066	92.8316	2066	90.6462	2066	92.9658
2065	90.8844	2065	89.5989	2065	88.6841	2065	92.8949	2065	90.6703	2065	92.9718
2064	90.8588	2064	89.6254	2064	88.6745	2064	92.8597	2064	90.6447	2064	92.9682
2063	90.8716	2063	89.6062	2063	88.6568	2063	92.7988	2063	90.6302	2063	92.9221
2062	90.8696	2062	89.5906	2062	88.6511	2062	92.8196	2062	90.6395	2062	92.8967
2061	90.8615	2061	89.5788	2061	88.6619	2061	92.8937	2061	90.6399	2061	92.9214
2060	90.8779	2060	89.5641	2060	88.6942	2060	92.9227	2060	90.661	2060	92.969
2059	90.859	2059	89.5365	2059	88.6864	2059	92.8799	2059	90.6551	2059	92.9863
2058	90.8195	2058	89.4938	2058	88.6291	2058	92.8433	2058	90.5865	2058	92.9603
2057	90.8502	2057	89.4847	2057	88.63	2057	92.8475	2057	90.5557	2057	92.8827
2056	90.8175	2056	89.503	2056	88.5991	2056	92.8333	2056	90.5595	2056	92.8456
2055	90.797	2055	89.5239	2055	88.5919	2055	92.8376	2055	90.6248	2055	92.8665
2054	90.8605	2054	89.6029	2054	88.7057	2054	92.9183	2054	90.7117	2054	92.9181
2053	90.829	2053	89.5908	2053	88.6943	2053	92.9254	2053	90.7062	2053	92.9157
2052	90.6877	2052	89.4838	2052	88.5296	2052	92.762	2052	90.5431	2052	92.7927
2051	90.6349	2051	89.4334	2051	88.414	2051	92.5902	2051	90.3611	2051	92.6506
2050	90.7365	2050	89.5129	2050	88.4912	2050	92.6406	2050	90.3978	2050	92.7446
2049	90.7675	2049	89.5787	2049	88.5931	2049	92.7052	2049	90.5293	2049	92.9111
2048	90.7796	2048	89.5383	2048	88.6087	2048	92.7548	2048	90.5467	2048	92.8889
2047	90.8412	2047	89.5262	2047	88.624	2047	92.801	2047	90.5183	2047	92.85
2046	90.845	2046	89.572	2046	88.6212	2046	92.8131	2046	90.577	2046	92.9109
2045	90.8208	2045	89.6356	2045	88.6119	2045	92.8232	2045	90.6226	2045	92.9683
2044	90.816	2044	89.6381	2044	88.6397	2044	92.8623	2044	90.6048	2044	92.9268
2043	90.8034	2043	89.5997	2043	88.592	2043	92.8568	2043	90.5578	2043	92.8559
2042	90.6698	2042	89.5417	2042	88.5338	2042	92.7967	2042	90.5014	2042	92.8306
2041	90.6207	2041	89.5679	2041	88.5639	2041	92.8041	2041	90.501	2041	92.8683
2040	90.8113	2040	89.6537	2040	88.7077	2040	92.8896	2040	90.6333	2040	92.9043
2039	90.946	2039	89.6554	2039	88.7345	2039	92.9343	2039	90.6705	2039	92.8813
2038	90.9042	2038	89.6248	2038	88.6994	2038	92.9491	2038	90.5828	2038	92.8397
2037	90.793	2037	89.5716	2037	88.6478	2037	92.8718	2037	90.5674	2037	92.7613
2036	90.7138	2036	89.5394	2036	88.6142	2036	92.7488	2036	90.5486	2036	92.7443
2035	90.6378	2035	89.5008	2035	88.5817	2035	92.6955	2035	90.477	2035	92.7288
2034	90.7485	2034	89.5966	2034	88.6511	2034	92.7359	2034	90.564	2034	92.8071
2033	90.8874	2033	89.7215	2033	88.7049	2033	92.7765	2033	90.6494	2033	92.8839
2032	90.7802	2032	89.6739	2032	88.6073	2032	92.8067	2032	90.6019	2032	92.8386
2031	90.7291	2031	89.6665	2031	88.6172	2031	92.8542	2031	90.588	2031	92.926
2030	90.8127	2030	89.7238	2030	88.7088	2030	92.8909	2030	90.7506	2030	93.1221
2029	90.7867	2029	89.6643	2029	88.6799	2029	92.8778	2029	90.7332	2029	92.9776
2028	90.7168	2028	89.6059	2028	88.6233	2028	92.8828	2028	90.6176	2028	92.8629
2027	90.7586	2027	89.6638	2027	88.6865	2027	92.9629	2027	90.6021	2027	93.0346
2026	90.8454	2026	89.7378	2026	88.8079	2026	93.0002	2026	90.6495	2026	93.1409
2025	90.8496	2025	89.6623	2025	88.8372	2025	92.8629	2025	90.6972	2025	93.0349
2024	90.8543	2024	89.6341	2024	88.7677	2024	92.9434	2024	90.7935	2024	92.9538
2023	90.8616	2023	89.6002	2023	88.6053	2023	92.9877	2023	90.6575	2023	92.9567
2022	90.9367	2022	89.5206	2022	88.5932	2022	92.869	2022	90.5822	2022	92.9877
2021	90.9298	2021	89.5787	2021	88.6185	2021	92.8794	2021	90.6524	2021	93.0035
2020	90.81	2020	89.6131	2020	88.6239	2020	92.9808	2020	90.6972	2020	93.0539
2019	90.8275	2019	89.6015	2019	88.6325	2019	92.9029	2019	90.6654	2019	93.1091
2018	90.7584	2018	89.5991	2018	88.626	2018	92.899	2018	90.6357	2018	93.0211
2017	90.6945	2017	89.518	2017	88.6625	2017	92.9361	2017	90.5942	2017	92.9808
2016	90.7451	2016	89.4708	2016	88.6775	2016	92.94	2016	90.6011	2016	93.0156
2015	90.7893	2015	89.5035	2015	88.6245	2015	92.9808	2015	90.6283	2015	92.9404
2014	90.8268	2014	89.493	2014	88.5029	2014	92.8656	2014	90.62	2014	92.8514
2013	90.7606	2013	89.5379	2013	88.4898	2013	92.7783	2013	90.6601	2013	92.888
2012	90.6909	2012	89.5169	2012	88.5287	2012	92.833	2012	90.6411	2012	92.927
2011	90.7812	2011	89.4932	2011	88.5168	2011	92.899	2011	90.5526	2011	92.8769
2010	90.9024	2010	89.5873	2010	88.5113	2010	92.9016	2010	90.5763	2010	92.9128
2009	90.8897	2009	89.5542	2009	88.5379	2009	92.8241	2009	90.6009	2009	93.0467
2008	90.8046	2008	89.5005	2008	88.6173	2008	92.8149	2008	90.5296	2008	93.0011
2007	90.7418	2007	89.471	2007	88.5901	2007	92.7929	2007	90.465	2007	92.8424
2006	90.6833	2006	89.4509	2006	88.5441	2006	92.7531	2006	90.5045	2006	92.9071
2005	90.6982	2005	89.4977	2005	88.5072	2005	92.7605	2005	90.6006	2005	92.9904
2004	90.7976	2004	89.4821	2004	88.512	2004	92.8391	2004	90.606	2004	92.9386
2003	90.7645	2003	89.4269	2003	88.4838	2003	92.8661	2003	90.601	2003	92.8297
2002	90.6992	2002	89.4722	2002	88.4937	2002	92.7924	2002	90.5808	2002	92.8311
[truncated: 1,602 more rows]

## Sheet: Fig. 3 (XRD)
angle	x = 0.0	angle	x = 0.2	angle	x = 0.4	angle	x = 0.6	angle	x = 0.8	angle	x = 1.0
10.04	0	10	0	10	0	10	0	10	0	10	0
10.06	0	10.02	2	10.02	1	10.02	4	10.02	2	10.02	3
10.08	0	10.04	5	10.04	5	10.04	10	10.04	6	10.04	4
10.1	0	10.06	6	10.06	9	10.06	16	10.06	9	10.06	4
10.12	0	10.08	8	10.08	12	10.08	20	10.08	14	10.08	5
10.14	0	10.1	10	10.1	13	10.1	21	10.1	17	10.1	8
10.16	0	10.12	12	10.12	12	10.12	20	10.12	20	10.12	13
10.18	0	10.14	15	10.14	9	10.14	17	10.14	21	10.14	20
10.2	0	10.16	17	10.16	7	10.16	13	10.16	20	10.16	24
10.22	0	10.18	20	10.18	7	10.18	11	10.18	19	10.18	24
10.24	0	10.2	23	10.2	11	10.2	11	10.2	18	10.2	21
10.26	8	10.22	25	10.22	16	10.22	13	10.22	18	10.22	16
10.28	17	10.24	25	10.24	21	10.24	18	10.24	18	10.24	13
10.3	22	10.26	22	10.26	24	10.26	23	10.26	17	10.26	10
10.32	21	10.28	18	10.28	22	10.28	28	10.28	17	10.28	8
10.34	17	10.3	13	10.3	16	10.3	30	10.3	17	10.3	7
10.36	11	10.32	10	10.32	9	10.32	31	10.32	18	10.32	7
10.38	6	10.34	9	10.34	2	10.34	32	10.34	20	10.34	8
10.4	4	10.36	11	10.36	0	10.36	31	10.36	24	10.36	11
10.42	4	10.38	14	10.38	0	10.38	30	10.38	27	10.38	12
10.44	3	10.4	17	10.4	0	10.4	27	10.4	28	10.4	9
10.46	2	10.42	19	10.42	0	10.42	21	10.42	24	10.42	4
10.48	0	10.44	19	10.44	0	10.44	14	10.44	18	10.44	0
10.5	0	10.46	18	10.46	0	10.46	8	10.46	11	10.46	0
10.52	1	10.48	15	10.48	5	10.48	4	10.48	6	10.48	4
10.54	5	10.5	14	10.5	11	10.5	3	10.5	5	10.5	11
10.56	12	10.52	14	10.52	15	10.52	3	10.52	5	10.52	18
10.58	20	10.54	16	10.54	18	10.54	5	10.54	5	10.54	21
10.6	26	10.56	19	10.56	18	10.56	5	10.56	5	10.56	17
10.62	31	10.58	23	10.58	19	10.58	6	10.58	4	10.58	9
10.64	34	10.6	28	10.6	20	10.6	6	10.6	5	10.6	0
10.66	35	10.62	32	10.62	25	10.62	7	10.62	6	10.62	0
10.68	34	10.64	36	10.64	31	10.64	8	10.64	5	10.64	0
10.7	31	10.66	36	10.66	38	10.66	8	10.66	3	10.66	0
10.72	28	10.68	33	10.68	44	10.68	8	10.68	0	10.68	0
10.74	23	10.7	26	10.7	47	10.7	7	10.7	0	10.7	0
10.76	20	10.72	17	10.72	46	10.72	7	10.72	0	10.72	0
10.78	17	10.74	10	10.74	43	10.74	8	10.74	0	10.74	0
10.8	16	10.76	6	10.76	39	10.76	10	10.76	0	10.76	0
10.82	14	10.78	8	10.78	35	10.78	12	10.78	0	10.78	0
10.84	13	10.8	15	10.8	33	10.8	14	10.8	0	10.8	0
10.86	12	10.82	24	10.82	33	10.82	15	10.82	0	10.82	0
10.88	11	10.84	32	10.84	35	10.84	15	10.84	0	10.84	0
10.9	13	10.86	36	10.86	36	10.86	17	10.86	0	10.86	0
10.92	16	10.88	35	10.88	36	10.88	20	10.88	0	10.88	7
10.94	21	10.9	30	10.9	34	10.9	24	10.9	2	10.9	15
10.96	24	10.92	24	10.92	31	10.92	29	10.92	6	10.92	23
10.98	27	10.94	21	10.94	29	10.94	31	10.94	9	10.94	29
11	29	10.96	21	10.96	27	10.96	31	10.96	10	10.96	33
11.02	30	10.98	24	10.98	25	10.98	28	10.98	9	10.98	36
11.04	31	11	30	11	23	11	22	11	8	11	37
11.06	30	11.02	36	11.02	22	11.02	15	11.02	8	11.02	37
11.08	28	11.04	41	11.04	23	11.04	10	11.04	10	11.04	36
11.1	26	11.06	45	11.06	25	11.06	9	11.06	12	11.06	33
11.12	25	11.08	45	11.08	27	11.08	10	11.08	15	11.08	29
11.14	27	11.1	43	11.1	27	11.1	13	11.1	18	11.1	25
11.16	30	11.12	39	11.12	24	11.12	16	11.12	19	11.12	19
11.18	31	11.14	35	11.14	20	11.14	19	11.14	18	11.14	12
11.2	32	11.16	33	11.16	18	11.16	21	11.16	15	11.16	4
11.22	30	11.18	31	11.18	21	11.18	22	11.18	11	11.18	0
11.24	27	11.2	28	11.2	28	11.2	21	11.2	7	11.2	0
11.26	22	11.22	25	11.22	37	11.22	19	11.22	6	11.22	0
11.28	16	11.24	22	11.24	45	11.24	17	11.24	10	11.24	0
11.3	10	11.26	22	11.26	50	11.26	15	11.26	16	11.26	2
11.32	6	11.28	22	11.28	53	11.28	15	11.28	25	11.28	13
11.34	7	11.3	23	11.3	52	11.3	17	11.3	31	11.3	25
11.36	13	11.32	25	11.32	49	11.32	19	11.32	35	11.32	33
11.38	24	11.34	26	11.34	45	11.34	21	11.34	36	11.34	37
11.4	36	11.36	27	11.36	40	11.36	23	11.36	34	11.36	37
11.42	45	11.38	29	11.38	37	11.38	25	11.38	32	11.38	35
11.44	47	11.4	31	11.4	35	11.4	27	11.4	29	11.4	30
11.46	43	11.42	30	11.42	34	11.42	28	11.42	26	11.42	26
11.48	35	11.44	29	11.44	34	11.44	28	11.44	23	11.44	19
11.5	26	11.46	27	11.46	33	11.46	28	11.46	21	11.46	11
11.52	20	11.48	26	11.48	31	11.48	30	11.48	20	11.48	2
11.54	18	11.5	26	11.5	27	11.5	32	11.5	19	11.5	0
11.56	20	11.52	27	11.52	22	11.52	35	11.52	16	11.52	0
11.58	25	11.54	29	11.54	16	11.54	36	11.54	11	11.54	0
11.6	29	11.56	31	11.56	11	11.56	35	11.56	5	11.56	0
11.62	33	11.58	30	11.58	8	11.58	32	11.58	1	11.58	0
11.64	35	11.6	26	11.6	7	11.6	29	11.6	1	11.6	0
11.66	36	11.62	20	11.62	10	11.62	29	11.62	5	11.62	0
11.68	35	11.64	11	11.64	14	11.64	30	11.64	9	11.64	0
11.7	32	11.66	5	11.66	19	11.66	32	11.66	10	11.66	0
11.72	28	11.68	2	11.68	24	11.68	35	11.68	8	11.68	0
11.74	24	11.7	4	11.7	28	11.7	35	11.7	3	11.7	2
11.76	22	11.72	10	11.72	30	11.72	34	11.72	0	11.72	6
11.78	22	11.74	17	11.74	29	11.74	29	11.74	0	11.74	7
11.8	22	11.76	23	11.76	27	11.76	20	11.76	0	11.76	8
11.82	20	11.78	26	11.78	25	11.78	11	11.78	0	11.78	10
11.84	18	11.8	25	11.8	24	11.8	3	11.8	2	11.8	12
11.86	13	11.82	20	11.82	23	11.82	0	11.82	8	11.82	16
11.88	8	11.84	14	11.84	22	11.84	0	11.84	12	11.84	19
11.9	1	11.86	9	11.86	18	11.86	1	11.86	15	11.86	21
11.92	0	11.88	8	11.88	13	11.88	2	11.88	18	11.88	22
11.94	0	11.9	12	11.9	7	11.9	2	11.9	22	11.9	23
11.96	0	11.92	19	11.92	2	11.92	1	11.92	27	11.92	22
11.98	0	11.94	28	11.94	0	11.94	2	11.94	31	11.94	21
12	4	11.96	35	11.96	2	11.96	4	11.96	33	11.96	20
12.02	10	11.98	40	11.98	6	11.98	7	11.98	29	11.98	20
12.04	14	12	40	12	9	12	12	12	21	12	21
12.06	16	12.02	37	12.02	12	12.02	18	12.02	10	12.02	24
12.08	18	12.04	32	12.04	15	12.04	23	12.04	0	12.04	25
12.1	20	12.06	25	12.06	18	12.06	26	12.06	0	12.06	25
12.12	23	12.08	17	12.08	21	12.08	23	12.08	0	12.08	23
12.14	25	12.1	9	12.1	25	12.1	17	12.1	0	12.1	20
12.16	27	12.12	2	12.12	26	12.12	11	12.12	0	12.12	17
12.18	27	12.14	0	12.14	24	12.14	10	12.14	3	12.14	14
12.2	26	12.16	0	12.16	20	12.16	12	12.16	4	12.16	10
12.22	25	12.18	0	12.18	15	12.18	17	12.18	4	12.18	5
12.24	24	12.2	0	12.2	13	12.2	20	12.2	4	12.2	1
12.26	25	12.22	0	12.22	13	12.22	19	12.22	5	12.22	0
12.28	27	12.24	0	12.24	16	12.24	15	12.24	6	12.24	0
12.3	29	12.26	3	12.26	18	12.26	10	12.26	4	12.26	0
12.32	31	12.28	7	12.28	19	12.28	6	12.28	2	12.28	0
12.34	30	12.3	12	12.3	18	12.3	3	12.3	0	12.3	0
12.36	27	12.32	16	12.32	17	12.32	1	12.32	0	12.32	0
12.38	23	12.34	18	12.34	15	12.34	0	12.34	3	12.34	1
12.4	20	12.36	18	12.36	13	12.36	0	12.36	8	12.36	2
12.42	19	12.38	18	12.38	12	12.38	2	12.38	15	12.38	4
12.44	21	12.4	17	12.4	13	12.4	5	12.4	19	12.4	5
12.46	22	12.42	16	12.42	16	12.42	11	12.42	22	12.42	6
12.48	22	12.44	14	12.44	21	12.44	17	12.44	22	12.44	6
12.5	19	12.46	12	12.46	27	12.46	22	12.46	20	12.46	6
12.52	15	12.48	10	12.48	33	12.48	27	12.48	19	12.48	7
12.54	11	12.5	8	12.5	37	12.5	28	12.5	17	12.5	6
12.56	7	12.52	8	12.52	39	12.52	26	12.52	18	12.52	5
12.58	5	12.54	8	12.54	39	12.54	22	12.54	21	12.54	3
12.6	2	12.56	11	12.56	37	12.56	16	12.56	26	12.56	3
12.62	1	12.58	16	12.58	33	12.58	12	12.58	33	12.58	5
12.64	0	12.6	22	12.6	29	12.6	10	12.6	38	12.6	9
12.66	1	12.62	27	12.62	27	12.62	12	12.62	41	12.62	14
12.68	4	12.64	31	12.64	25	12.64	16	12.64	39	12.64	19
12.7	9	12.66	33	12.66	23	12.66	19	12.66	33	12.66	22
12.72	17	12.68	33	12.68	20	12.68	21	12.68	28	12.68	23
12.74	27	12.7	33	12.7	17	12.7	19	12.7	25	12.7	20
12.76	36	12.72	33	12.72	14	12.72	15	12.72	28	12.72	15
12.78	42	12.74	34	12.74	13	12.74	9	12.74	33	12.74	10
12.8	42	12.76	33	12.76	13	12.76	3	12.76	38	12.76	6
12.82	39	12.78	30	12.78	16	12.78	0	12.78	39	12.78	3
12.84	34	12.8	25	12.8	21	12.8	0	12.8	35	12.8	1
12.86	32	12.82	19	12.82	26	12.82	3	12.82	27	12.82	0
12.88	31	12.84	14	12.84	30	12.84	7	12.84	18	12.84	0
12.9	33	12.86	12	12.86	34	12.86	11	12.86	11	12.86	0
12.92	35	12.88	14	12.88	36	12.88	15	12.88	6	12.88	0
12.94	36	12.9	19	12.9	40	12.9	16	12.9	2	12.9	0
12.96	36	12.92	25	12.92	43	12.92	14	12.92	0	12.92	0
12.98	36	12.94	29	12.94	47	12.94	11	12.94	0	12.94	0
13	37	12.96	32	12.96	50	12.96	6	12.96	0	12.96	0
13.02	38	12.98	33	12.98	48	12.98	1	12.98	0	12.98	0
13.04	38	13	33	13	42	13	0	13	4	13	0
13.06	37	13.02	35	13.02	33	13.02	0	13.02	9	13.02	0
13.08	35	13.04	37	13.04	25	13.04	0	13.04	11	13.04	0
13.1	32	13.06	40	13.06	19	13.06	0	13.06	11	13.06	0
13.12	28	13.08	43	13.08	17	13.08	0	13.08	10	13.08	3
13.14	23	13.1	47	13.1	16	13.1	0	13.1	9	13.1	9
13.16	16	13.12	50	13.12	16	13.12	0	13.12	11	13.12	15
13.18	9	13.14	53	13.14	15	13.14	3	13.14	14	13.14	20
13.2	3	13.16	52	13.16	16	13.16	5	13.16	19	13.16	24
13.22	0	13.18	48	13.18	19	13.18	6	13.18	22	13.18	27
13.24	0	13.2	43	13.2	23	13.2	7	13.2	25	13.2	26
13.26	3	13.22	37	13.22	28	13.22	8	13.22	26	13.22	23
13.28	7	13.24	33	13.24	34	13.24	9	13.24	27	13.24	19
13.3	10	13.26	32	13.26	41	13.26	10	13.26	29	13.26	15
13.32	12	13.28	32	13.28	46	13.28	12	13.28	28	13.28	12
13.34	12	13.3	33	13.3	49	13.3	14	13.3	26	13.3	11
13.36	9	13.32	32	13.32	48	13.32	16	13.32	21	13.32	11
13.38	6	13.34	30	13.34	41	13.34	18	13.34	15	13.34	10
13.4	2	13.36	25	13.36	32	13.36	18	13.36	9	13.36	7
13.42	0	13.38	18	13.38	23	13.38	17	13.38	3	13.38	4
13.44	0	13.4	13	13.4	16	13.4	15	13.4	0	13.4	0
13.46	4	13.42	9	13.42	13	13.42	13	13.42	0	13.42	0
13.48	9	13.44	8	13.44	14	13.44	10	13.44	0	13.44	0
13.5	14	13.46	8	13.46	19	13.46	7	13.46	2	13.46	3
13.52	15	13.48	10	13.48	24	13.48	7	13.48	11	13.48	9
13.54	15	13.5	11	13.5	27	13.5	10	13.5	20	13.5	16
13.56	12	13.52	11	13.52	27	13.52	14	13.52	24	13.52	23
13.58	11	13.54	12	13.54	26	13.54	20	13.54	24	13.54	30
13.6	12	13.56	13	13.56	25	13.56	25	13.56	21	13.56	36
13.62	16	13.58	13	13.58	24	13.58	27	13.58	17	13.58	40
13.64	20	13.6	14	13.6	24	13.6	28	13.6	14	13.6	41
13.66	25	13.62	15	13.62	24	13.62	26	13.62	13	13.62	39
13.68	27	13.64	16	13.64	23	13.64	24	13.64	13	13.64	35
13.7	29	13.66	17	13.66	23	13.66	23	13.66	14	13.66	33
13.72	29	13.68	16	13.68	21	13.68	24	13.68	14	13.68	31
13.74	27	13.7	14	13.7	18	13.7	25	13.7	12	13.7	30
13.76	24	13.72	12	13.72	13	13.72	26	13.72	9	13.72	28
13.78	21	13.74	10	13.74	9	13.74	26	13.74	4	13.74	25
13.8	18	13.76	10	13.76	9	13.76	26	13.76	0	13.76	20
13.82	16	13.78	10	13.78	13	13.78	26	13.78	0	13.78	17
13.84	14	13.8	11	13.8	18	13.8	26	13.8	0	13.8	17
13.86	13	13.82	12	13.82	23	13.82	28	13.82	0	13.82	20
13.88	12	13.84	15	13.84	26	13.84	30	13.84	0	13.84	25
13.9	12	13.86	17	13.86	27	13.86	32	13.86	1	13.86	30
13.92	13	13.88	20	13.88	27	13.88	34	13.88	5	13.88	33
13.94	15	13.9	21	13.9	28	13.9	36	13.9	8	13.9	33
13.96	18	13.92	23	13.92	29	13.92	37	13.92	10	13.92	31
13.98	22	13.94	27	13.94	30	13.94	37	13.94	12	13.94	27
14	25	13.96	33	13.96	28	13.96	38	13.96	13	13.96	22
14.02	27	13.98	40	13.98	23	13.98	38	13.98	15	13.98	16
14.04	27	14	44	14	15	14	39	14	18	14	10
14.06	23	14.02	44	14.02	8	14.02	41	14.02	21	14.02	6
14.08	18	14.04	41	14.04	4	14.04	44	14.04	24	14.04	5
14.1	12	14.06	37	14.06	4	14.06	47	14.06	25	14.06	7
14.12	7	14.08	34	14.08	7	14.08	48	14.08	25	14.08	11
14.14	4	14.1	34	14.1	10	14.1	48	14.1	23	14.1	17
14.16	3	14.12	36	14.12	12	14.12	44	14.12	21	14.12	22
14.18	4	14.14	38	14.14	14	14.14	39	14.14	20	14.14	25
14.2	4	14.16	40	14.16	17	14.16	34	14.16	21	14.16	26
14.22	4	14.18	42	14.18	21	14.18	31	14.18	24	14.18	25
14.24	2	14.2	42	14.2	27	14.2	32	14.2	27	14.2	25
14.26	0	14.22	42	14.22	32	14.22	35	14.22	28	14.22	25
14.28	0	14.24	40	14.24	38	14.24	38	14.24	26	14.24	23
14.3	0	14.26	38	14.26	42	14.26	39	14.26	22	14.26	20
14.32	0	14.28	36	14.28	45	14.28	36	14.28	16	14.28	16
14.34	1	14.3	34	14.3	47	14.3	32	14.3	9	14.3	12
14.36	6	14.32	30	14.32	46	14.32	27	14.32	4	14.32	8
14.38	9	14.34	25	14.34	46	14.34	26	14.34	2	14.34	3
14.4	8	14.36	19	14.36	46	14.36	28	14.36	4	14.36	0
14.42	6	14.38	14	14.38	46	14.38	34	14.38	8	14.38	0
14.44	2	14.4	12	14.4	47	14.4	39	14.4	13	14.4	0
14.46	1	14.42	12	14.42	46	14.42	41	14.42	17	14.42	2
14.48	2	14.44	13	14.44	43	14.44	39	14.44	18	14.44	6
14.5	6	14.46	15	14.46	38	14.46	35	14.46	17	14.46	9
14.52	12	14.48	19	14.48	32	14.48	31	14.48	15	14.48	10
14.54	18	14.5	22	14.5	26	14.5	28	14.5	13	14.5	9
14.56	25	14.52	26	14.52	19	14.52	25	14.52	10	14.52	6
14.58	32	14.54	28	14.54	12	14.54	21	14.54	8	14.54	3
14.6	38	14.56	28	14.56	7	14.56	15	14.56	8	14.56	1
14.62	40	14.58	25	14.58	3	14.58	9	14.58	11	14.58	1
14.64	39	14.6	22	14.6	0	14.6	3	14.6	17	14.6	3
14.66	34	14.62	19	14.62	0	14.62	0	14.62	23	14.62	6
14.68	27	14.64	19	14.64	0	14.64	0	14.64	30	14.64	9
14.7	21	14.66	22	14.66	0	14.66	3	14.66	34	14.66	13
14.72	15	14.68	26	14.68	3	14.68	12	14.68	34	14.68	16
14.74	10	14.7	30	14.7	8	14.7	22	14.7	30	14.7	18
14.76	7	14.72	32	14.72	13	14.72	30	14.72	24	14.72	18
14.78	6	14.74	33	14.74	18	14.74	34	14.74	18	14.74	17
14.8	6	14.76	34	14.76	22	14.76	33	14.76	15	14.76	15
14.82	7	14.78	36	14.78	24	14.78	29	14.78	16	14.78	13
14.84	7	14.8	39	14.8	24	14.8	26	14.8	21	14.8	12
14.86	7	14.82	41	14.82	23	14.82	26	14.82	27	14.82	12
14.88	7	14.84	40	14.84	23	14.84	28	14.84	33	14.84	13
14.9	8	14.86	36	14.86	23	14.86	28	14.86	38	14.86	15
14.92	10	14.88	30	14.88	24	14.88	26	14.88	41	14.88	18
14.94	12	14.9	23	14.9	23	14.9	19	14.9	42	14.9	19
14.96	14	14.92	16	14.92	21	14.92	11	14.92	40	14.92	19
14.98	17	14.94	12	14.94	17	14.94	3	14.94	37	14.94	17
15	19	14.96	9	14.96	14	14.96	0	14.96	33	14.96	15
15.02	22	14.98	9	14.98	10	14.98	0	14.98	28	14.98	16
15.04	25	15	10	15	7	15	0	15	23	15	18
15.06	28	15.02	13	15.02	6	15.02	5	15.02	18	15.02	23
15.08	29	15.04	16	15.04	8	15.04	11	15.04	14	15.04	28
15.1	27	15.06	18	15.06	11	15.06	19	15.06	9	15.06	32
15.12	23	15.08	20	15.08	15	15.08	28	15.08	7	15.08	36
15.14	17	15.1	21	15.1	18	15.1	36	15.1	9	15.1	38
15.16	10	15.12	20	15.12	20	15.12	43	15.12	13	15.12	37
15.18	4	15.14	17	15.14	21	15.14	47	15.14	17	15.14	35
15.2	0	15.16	14	15.16	23	15.16	47	15.16	21	15.16	29
15.22	0	15.18	11	15.18	24	15.18	44	15.18	24	15.18	20
15.24	0	15.2	9	15.2	26	15.2	36	15.2	25	15.2	9
15.26	0	15.22	8	15.22	26	15.22	27	15.22	27	15.22	0
15.28	0	15.24	8	15.24	25	15.24	19	15.24	28	15.24	0
15.3	0	15.26	9	15.26	25	15.26	16	15.26	31	15.26	0
15.32	3	15.28	11	15.28	26	15.28	18	15.28	34	15.28	0
15.34	7	15.3	14	15.3	29	15.3	23	15.3	35	15.3	3
15.36	10	15.32	15	15.32	32	15.32	29	15.32	35	15.32	8
15.38	13	15.34	14	15.34	35	15.34	33	15.34	31	15.34	11
15.4	15	15.36	11	15.36	37	15.36	37	15.36	23	15.36	13
15.42	16	15.38	6	15.38	38	15.38	40	15.38	12	15.38	16
15.44	18	15.4	2	15.4	38	15.4	42	15.4	0	15.4	21
15.46	20	15.42	0	15.42	38	15.42	42	15.42	0	15.42	26
15.48	21	15.44	0	15.44	36	15.44	42	15.44	0	15.44	29
15.5	22	15.46	0	15.46	33	15.46	40	15.46	0	15.46	29
15.52	24	15.48	0	15.48	27	15.48	38	15.48	0	15.48	26
15.54	26	15.5	0	15.5	19	15.5	37	15.5	0	15.5	22
15.56	27	15.52	0	15.52	12	15.52	36	15.52	6	15.52	18
15.58	27	15.54	7	15.54	5	15.54	35	15.54	9	15.54	15
15.6	25	15.56	14	15.56	2	15.56	33	15.56	10	15.56	12
15.62	23	15.58	17	15.58	2	15.58	28	15.58	9	15.58	10
15.64	20	15.6	17	15.6	3	15.6	20	15.6	6	15.6	11
15.66	16	15.62	15	15.62	6	15.62	11	15.62	4	15.62	14
15.68	12	15.64	14	15.64	9	15.64	3	15.64	3	15.64	17
15.7	8	15.66	14	15.66	12	15.66	0	15.66	4	15.66	19
15.72	4	15.68	18	15.68	15	15.68	0	15.68	5	15.68	20
15.74	1	15.7	22	15.7	19	15.7	7	15.7	6	15.7	20
15.76	0	15.72	25	15.72	23	15.72	17	15.72	6	15.72	18
15.78	0	15.74	27	15.74	27	15.74	28	15.74	5	15.74	15
15.8	2	15.76	28	15.76	28	15.76	39	15.76	2	15.76	11
15.82	7	15.78	27	15.78	28	15.78	45	15.78	0	15.78	5
15.84	11	15.8	26	15.8	25	15.8	45	15.8	1	15.8	0
15.86	14	15.82	25	15.82	22	15.82	41	15.82	5	15.82	0
15.88	16	15.84	23	15.84	20	15.84	33	15.84	12	15.84	0
15.9	17	15.86	21	15.86	19	15.86	24	15.86	20	15.86	0
15.92	20	15.88	18	15.88	21	15.88	15	15.88	27	15.88	0
15.94	23	15.9	15	15.9	21	15.9	6	15.9	32	15.9	0
15.96	26	15.92	12	15.92	20	15.92	1	15.92	35	15.92	0
15.98	27	15.94	11	15.94	17	15.94	0	15.94	35	15.94	0
16	24	15.96	10	15.96	15	15.96	0	15.96	33	15.96	3
16.02	21	15.98	9	15.98	15	15.98	0	15.98	29	15.98	9
16.04	17	16	6	16	17	16	1	16	24	16	15
16.06	13	16.02	2	16.02	20	16.02	2	16.02	21	16.02	21
16.08	10	16.04	0	16.04	20	16.04	4	16.04	19	16.04	27
16.1	6	16.06	0	16.06	16	16.06	6	16.06	18	16.06	31
16.12	1	16.08	0	16.08	9	16.08	8	16.08	18	16.08	32
16.14	0	16.1	0	16.1	0	16.1	11	16.1	18	16.1	31
16.16	0	16.12	4	16.12	0	16.12	12	16.12	18	16.12	28
16.18	0	16.14	9	16.14	0	16.14	11	16.14	18	16.14	26
16.2	0	16.16	15	16.16	0	16.16	9	16.16	18	16.16	26
16.22	0	16.18	21	16.18	0	16.18	5	16.18	16	16.18	26
16.24	0	16.2	27	16.2	7	16.2	0	16.2	12	16.2	27
16.26	0	16.22	31	16.22	15	16.22	0	16.22	7	16.22	25
16.28	0	16.24	33	16.24	18	16.24	0	16.24	3	16.24	21
16.3	1	16.26	34	16.26	18	16.26	0	16.26	1	16.26	16
16.32	4	16.28	32	16.28	17	16.28	0	16.28	3	16.28	10
16.34	9	16.3	27	16.3	17	16.3	0	16.3	9	16.3	6
16.36	13	16.32	21	16.32	20	16.32	9	16.32	17	16.32	4
16.38	16	16.34	15	16.34	24	16.34	18	16.34	26	16.34	4
16.4	17	16.36	9	16.36	26	16.36	25	16.36	32	16.36	3
16.42	17	16.38	5	16.38	25	16.38	28	16.38	35	16.38	3
16.44	15	16.4	4	16.4	19	16.4	28	16.4	34	16.4	2
16.46	12	16.42	4	16.42	11	16.42	25	16.42	30	16.42	1
16.48	8	16.44	5	16.44	4	16.44	20	16.44	25	16.44	0
16.5	6	16.46	6	16.46	1	16.46	15	16.46	20	16.46	0
16.52	5	16.48	8	16.48	1	16.48	12	16.48	17	16.48	0
16.54	6	16.5	9	16.5	2	16.5	12	16.5	14	16.5	0
16.56	10	16.52	9	16.52	3	16.52	16	16.52	12	16.52	0
16.58	17	16.54	7	16.54	1	16.54	20	16.54	9	16.54	0
16.6	25	16.56	5	16.56	0	16.56	23	16.56	7	16.56	0
16.62	32	16.58	5	16.58	0	16.58	24	16.58	6	16.58	0
16.64	36	16.6	8	16.6	0	16.6	22	16.6	8	16.6	0
16.66	37	16.62	13	16.62	2	16.62	19	16.62	11	16.62	0
16.68	35	16.64	18	16.64	8	16.64	18	16.64	16	16.64	3
16.7	33	16.66	23	16.66	12	16.66	17	16.66	23	16.66	8
16.72	31	16.68	25	16.68	15	16.68	17	16.68	28	16.68	8
16.74	30	16.7	25	16.7	15	16.7	18	16.7	30	16.7	7
16.76	28	16.72	24	16.72	12	16.72	18	16.72	29	16.72	7
16.78	25	16.74	22	16.74	8	16.74	18	16.74	25	16.74	7
16.8	21	16.76	21	16.76	3	16.76	18	16.76	21	16.76	8
16.82	16	16.78	18	16.78	0	16.78	18	16.78	18	16.78	8
16.84	12	16.8	16	16.8	0	16.8	19	16.8	16	16.8	9
16.86	9	16.82	13	16.82	0	16.82	21	16.82	13	16.82	9
16.88	7	16.84	11	16.84	0	16.84	23	16.84	9	16.84	11
16.9	7	16.86	10	16.86	0	16.86	25	16.86	6	16.86	13
16.92	7	16.88	10	16.88	0	16.88	27	16.88	6	16.88	17
16.94	6	16.9	12	16.9	0	16.9	29	16.9	8	16.9	21
16.96	5	16.92	15	16.92	4	16.92	31	16.92	14	16.92	25
16.98	3	16.94	18	16.94	8	16.94	32	16.94	19	16.94	27
17	0	16.96	21	16.96	11	16.96	31	16.96	25	16.96	26
17.02	0	16.98	22	16.98	12	16.98	29	16.98	28	16.98	23
17.04	0	17	20	17	13	17	24	17	28	17	19
17.06	0	17.02	17	17.02	13	17.02	20	17.02	26	17.02	13
17.08	0	17.04	14	17.04	13	17.04	18	17.04	22	17.04	6
17.1	0	17.06	13	17.06	13	17.06	18	17.06	17	17.06	0
17.12	0	17.08	13	17.08	12	17.08	21	17.08	14	17.08	0
17.14	0	17.1	14	17.1	12	17.1	26	17.1	11	17.1	0
17.16	4	17.12	15	17.12	11	17.12	31	17.12	9	17.12	0
17.18	9	17.14	16	17.14	11	17.14	34	17.14	8	17.14	0
17.2	11	17.16	16	17.16	11	17.16	36	17.16	6	17.16	0
17.22	12	17.18	16	17.18	13	17.18	36	17.18	4	17.18	0
17.24	13	17.2	15	17.2	16	17.2	36	17.2	2	17.2	0
17.26	15	17.22	14	17.22	19	17.22	35	17.22	2	17.22	3
17.28	20	17.24	14	17.24	23	17.24	34	17.24	4	17.24	7
17.3	26	17.26	13	17.26	26	17.26	31	17.26	7	17.26	10
17.32	32	17.28	14	17.28	28	17.28	28	17.28	10	17.28	11
17.34	35	17.3	15	17.3	29	17.3	26	17.3	11	17.3	12
17.36	36	17.32	16	17.32	29	17.32	25	17.32	10	17.32	11
17.38	35	17.34	16	17.34	28	17.34	25	17.34	8	17.34	10
17.4	34	17.36	15	17.36	26	17.36	26	17.36	6	17.36	8
17.42	35	17.38	11	17.38	25	17.38	26	17.38	6	17.38	5
17.44	40	17.4	8	17.4	24	17.4	25	17.4	6	17.4	3
17.46	46	17.42	6	17.42	23	17.42	23	17.42	5	17.42	3
17.48	50	17.44	5	17.44	21	17.44	20	17.44	4	17.44	6
17.5	49	17.46	5	17.46	19	17.46	17	17.46	1	17.46	11
17.52	42	17.48	8	17.48	17	17.48	15	17.48	0	17.48	17
17.54	31	17.5	13	17.5	17	17.5	15	17.5	0	17.5	23
17.56	19	17.52	18	17.52	22	17.52	16	17.52	3	17.52	26
17.58	10	17.54	23	17.54	30	17.54	19	17.54	10	17.54	26
17.6	5	17.56	27	17.56	39	17.56	21	17.56	19	17.56	26
17.62	4	17.58	30	17.58	46	17.58	23	17.58	27	17.58	26
17.64	8	17.6	33	17.6	49	17.6	23	17.6	34	17.6	27
17.66	14	17.62	35	17.62	48	17.62	22	17.62	39	17.62	30
17.68	21	17.64	38	17.64	45	17.64	23	17.64	43	17.64	33
17.7	28	17.66	41	17.66	43	17.66	28	17.66	47	17.66	36
17.72	32	17.68	45	17.68	46	17.68	37	17.68	53	17.68	41
17.74	34	17.7	52	17.7	52	17.7	49	17.7	60	17.7	50
17.76	33	17.72	60	17.72	59	17.72	61	17.72	68	17.72	60
17.78	30	17.74	69	17.74	64	17.74	69	17.74	75	17.74	70
17.8	28	17.76	76	17.76	67	17.76	72	17.76	79	17.76	76
17.82	27	17.78	79	17.78	67	17.78	71	17.78	77	17.78	78
17.84	26	17.8	78	17.8	64	17.8	67	17.8	71	17.8	74
17.86	25	17.82	72	17.82	60	17.82	65	17.82	59	17.82	68
17.88	24	17.84	62	17.84	54	17.84	64	17.84	44	17.84	60
17.9	23	17.86	49	17.86	47	17.86	65	17.86	29	17.86	54
17.92	21	17.88	37	17.88	41	17.88	65	17.88	17	17.88	51
17.94	17	17.9	27	17.9	36	17.9	62	17.9	10	17.9	48
17.96	10	17.92	21	17.92	32	17.92	55	17.92	7	17.92	46
17.98	2	17.94	18	17.94	31	17.94	46	17.94	8	17.94	40
18	0	17.96	18	17.96	30	17.96	37	17.96	10	17.96	32
18.02	0	17.98	19	17.98	30	17.98	31	17.98	13	17.98	23
18.04	0	18	20	18	30	18	28	18	16	18	14
18.06	0	18.02	22	18.02	31	18.02	28	18.02	22	18.02	6
18.08	9	18.04	25	18.04	33	18.04	31	18.04	28	18.04	0
18.1	22	18.06	31	18.06	37	18.06	36	18.06	34	18.06	0
18.12	36	18.08	38	18.08	46	18.08	44	18.08	39	18.08	0
18.14	50	18.1	48	18.1	58	18.1	53	18.1	43	18.1	5
18.16	60	18.12	60	18.12	70	18.12	62	18.12	46	18.12	14
18.18	64	18.14	72	18.14	80	18.14	70	18.14	47	18.14	23
18.2	64	18.16	80	18.16	84	18.16	75	18.16	47	18.16	28
18.22	59	18.18	84	18.18	83	18.18	75	18.18	45	18.18	29
18.24	51	18.2	81	18.2	77	18.2	71	18.2	41	18.2	26
18.26	42	18.22	71	18.22	66	18.22	63	18.22	35	18.22	20
18.28	34	18.24	58	18.24	53	18.24	54	18.24	27	18.24	13
18.3	28	18.26	43	18.26	40	18.26	45	18.26	18	18.26	6
18.32	23	18.28	30	18.28	28	18.28	39	18.28	9	18.28	0
18.34	21	18.3	19	18.3	19	18.3	37	18.3	0	18.3	0
18.36	19	18.32	11	18.32	13	18.32	38	18.32	0	18.32	0
18.38	16	18.34	6	18.34	9	18.34	40	18.34	0	18.34	0
18.4	14	18.36	6	18.36	6	18.36	42	18.36	0	18.36	0
18.42	12	18.38	9	18.38	5	18.38	40	18.38	0	18.38	0
18.44	13	18.4	13	18.4	5	18.4	35	18.4	0	18.4	0
18.46	15	18.42	14	18.42	5	18.42	28	18.42	0	18.42	0
18.48	19	18.44	11	18.44	5	18.44	22	18.44	4	18.44	0
18.5	21	18.46	7	18.46	4	18.46	19	18.46	8	18.46	0
18.52	22	18.48	3	18.48	3	18.48	18	18.48	12	18.48	0
18.54	21	18.5	0	18.5	1	18.5	18	18.5	15	18.5	0
18.56	19	18.52	0	18.52	0	18.52	18	18.52	19	18.52	0
18.58	18	18.54	0	18.54	0	18.54	17	18.54	23	18.54	4
18.6	19	18.56	2	18.56	0	18.56	17	18.56	26	18.56	10
18.62	21	18.58	6	18.58	1	18.58	17	18.58	29	18.58	13
18.64	24	18.6	10	18.6	6	18.6	18	18.6	30	18.6	15
18.66	26	18.62	15	18.62	12	18.62	21	18.62	29	18.62	15
18.68	27	18.64	21	18.64	16	18.64	26	18.64	26	18.64	16
18.7	28	18.66	27	18.66	16	18.66	32	18.66	22	18.66	17
18.72	27	18.68	31	18.68	13	18.68	38	18.68	18	18.68	20
18.74	24	18.7	35	18.7	10	18.7	41	18.7	16	18.7	22
18.76	19	18.72	39	18.72	9	18.72	41	18.72	16	18.72	25
18.78	11	18.74	42	18.74	11	18.74	37	18.74	17	18.74	27
18.8	4	18.76	44	18.76	15	18.76	33	18.76	21	18.76	29
18.82	0	18.78	44	18.78	20	18.78	30	18.78	24	18.78	31
18.84	0	18.8	42	18.8	23	18.8	30	18.8	28	18.8	32
18.86	0	18.82	39	18.82	26	18.82	32	18.82	31	18.82	32
18.88	0	18.84	35	18.84	27	18.84	33	18.84	33	18.84	31
18.9	5	18.86	32	18.86	27	18.86	34	18.86	32	18.86	29
18.92	13	18.88	28	18.88	25	18.88	33	18.88	30	18.88	26
18.94	20	18.9	28	18.9	20	18.9	32	18.9	27	18.9	23
18.96	26	18.92	31	18.92	14	18.92	31	18.92	24	18.92	21
18.98	29	18.94	37	18.94	10	18.94	31	18.94	23	18.94	19
19	32	18.96	43	18.96	8	18.96	30	18.96	23	18.96	19
19.02	35	18.98	47	18.98	11	18.98	30	18.98	22	18.98	19
19.04	39	19	45	19	15	19	30	19	20	19	19
19.06	45	19.02	41	19.02	21	19.02	34	19.02	19	19.02	19
19.08	53	19.04	36	19.04	28	19.04	41	19.04	19	19.04	19
19.1	63	19.06	36	19.06	36	19.06	50	19.06	23	19.06	16
19.12	73	19.08	42	19.08	47	19.08	60	19.08	29	19.08	12
19.14	81	19.1	53	19.1	60	19.1	69	19.1	35	19.1	7
19.16	85	19.12	65	19.12	72	19.12	75	19.12	38	19.12	5
19.18	83	19.14	75	19.14	83	19.14	78	19.14	38	19.14	4
19.2	78	19.16	80	19.16	88	19.16	79	19.16	36	19.16	6
19.22	70	19.18	80	19.18	88	19.18	78	19.18	33	19.18	8
19.24	64	19.2	76	19.2	84	19.2	78	19.2	31	19.2	9
19.26	60	19.22	71	19.22	78	19.22	80	19.22	31	19.22	10
19.28	59	19.24	68	19.24	71	19.24	84	19.24	34	19.24	11
19.3	61	19.26	66	19.26	67	19.26	89	19.26	39	19.26	15
19.32	65	19.28	67	19.28	66	19.28	94	19.28	47	19.28	22
19.34	71	19.3	68	19.3	69	19.3	99	19.3	56	19.3	32
19.36	77	19.32	69	19.32	74	19.32	104	19.32	65	19.32	46
19.38	82	19.34	71	19.34	80	19.34	108	19.34	74	19.34	63
19.4	85	19.36	72	19.36	85	19.36	110	19.36	81	19.36	81
19.42	82	19.38	72	19.38	87	19.38	107	19.38	85	19.38	96
19.44	75	19.4	69	19.4	86	19.4	98	19.4	83	19.4	104
19.46	64	19.42	64	19.42	80	19.42	84	19.42	77	19.42	101
19.48	51	19.44	60	19.44	71	19.44	68	19.44	66	19.44	88
19.5	39	19.46	57	19.46	62	19.46	52	19.46	55	19.46	69
19.52	28	19.48	56	19.48	52	19.48	39	19.48	43	19.48	49
19.54	18	19.5	54	19.5	45	19.5	28	19.5	34	19.5	30
19.56	10	19.52	51	19.52	39	19.52	21	19.52	27	19.52	15
19.58	6	19.54	45	19.54	35	19.54	17	19.54	21	19.54	5
19.6	4	19.56	37	19.56	32	19.56	17	19.56	17	19.56	0
19.62	4	19.58	29	19.58	29	19.58	20	19.58	14	19.58	0
19.64	4	19.6	24	19.6	28	19.6	23	19.6	11	19.6	0
19.66	2	19.62	22	19.62	29	19.62	25	19.62	8	19.62	0
19.68	0	19.64	23	19.64	32	19.64	24	19.64	4	19.64	0
19.7	0	19.66	24	19.66	35	19.66	20	19.66	0	19.66	0
19.72	1	19.68	26	19.68	37	19.68	16	19.68	0	19.68	3
19.74	5	19.7	29	19.7	38	19.7	11	19.7	0	19.7	7
19.76	11	19.72	33	19.72	37	19.72	8	19.72	0	19.72	9
19.78	17	19.74	36	19.74	34	19.74	6	19.74	2	19.74	9
19.8	21	19.76	38	19.76	31	19.76	6	19.76	6	19.76	7
19.82	22	19.78	37	19.78	28	19.78	8	19.78	8	19.78	3
19.84	20	19.8	33	19.8	24	19.8	13	19.8	8	19.8	0
19.86	16	19.82	29	19.82	20	19.82	18	19.82	6	19.82	0
19.88	14	19.84	26	19.84	17	19.84	23	19.84	2	19.84	0
19.9	14	19.86	26	19.86	15	19.86	26	19.86	0	19.86	0
19.92	18	19.88	26	19.88	15	19.88	26	19.88	0	19.88	0
19.94	23	19.9	26	19.9	15	19.9	24	19.9	0	19.9	0
19.96	28	19.92	25	19.92	14	19.92	22	19.92	0	19.92	0
19.98	29	19.94	22	19.94	11	19.94	20	19.94	0	19.94	0
20	28	19.96	18	19.96	8	19.96	22	19.96	5	19.96	0
20.02	26	19.98	14	19.98	5	19.98	25	19.98	9	19.98	0
20.04	26	20	10	20	2	20	28	20	12	20	0
20.06	27	20.02	6	20.02	2	20.02	29	20.02	12	20.02	1
20.08	30	20.04	1	20.04	3	20.04	27	20.04	10	20.04	2
20.1	31	20.06	0	20.06	6	20.06	21	20.06	6	20.06	5
20.12	32	20.08	0	20.08	11	20.08	16	20.08	2	20.08	9
20.14	30	20.1	0	20.1	14	20.1	12	20.1	0	20.1	12
20.16	26	20.12	0	20.12	16	20.12	11	20.12	0	20.12	12
20.18	22	20.14	6	20.14	15	20.14	12	20.14	2	20.14	9
20.2	18	20.16	14	20.16	13	20.16	14	20.16	5	20.16	5
20.22	16	20.18	21	20.18	10	20.18	15	20.18	7	20.18	0
20.24	17	20.2	27	20.2	8	20.2	17	20.2	7	20.2	0
20.26	20	20.22	29	20.22	6	20.22	18	20.22	7	20.22	0
20.28	24	20.24	29	20.24	5	20.24	18	20.24	8	20.24	0
20.3	27	20.26	27	20.26	6	20.26	19	20.26	10	20.26	0
20.32	28	20.28	23	20.28	9	20.28	19	20.28	14	20.28	0
20.34	26	20.3	21	20.3	14	20.3	19	20.3	18	20.3	0
20.36	24	20.32	19	20.32	20	20.32	21	20.32	20	20.32	0
20.38	21	20.34	17	20.34	26	20.34	24	20.34	22	20.34	0
20.4	18	20.36	15	20.36	31	20.36	26	20.36	24	20.36	0
20.42	15	20.38	14	20.38	34	20.38	28	20.38	26	20.38	0
20.44	12	20.4	14	20.4	34	20.4	26	20.4	27	20.4	2
20.46	9	20.42	17	20.42	33	20.42	23	20.42	27	20.42	5
20.48	7	20.44	20	20.44	31	20.44	17	20.44	26	20.44	8
20.5	5	20.46	22	20.46	30	20.46	11	20.46	24	20.46	10
20.52	2	20.48	21	20.48	29	20.48	5	20.48	21	20.48	13
20.54	0	20.5	17	20.5	28	20.5	0	20.5	16	20.5	15
20.56	0	20.52	13	20.52	27	20.52	0	20.52	10	20.52	14
20.58	0	20.54	11	20.54	24	20.54	0	20.54	4	20.54	10
20.6	0	20.56	12	20.56	21	20.56	0	20.56	0	20.56	6
20.62	4	20.58	16	20.58	17	20.58	0	20.58	0	20.58	3
20.64	11	20.6	21	20.6	14	20.6	4	20.6	0	20.6	3
20.66	16	20.62	24	20.62	12	20.62	9	20.62	1	20.62	5
20.68	19	20.64	26	20.64	12	20.64	12	20.64	2	20.64	6
20.7	21	20.66	26	20.66	12	20.66	13	20.66	3	20.66	6
20.72	23	20.68	25	20.68	13	20.68	11	20.68	4	20.68	5
20.74	25	20.7	23	20.7	15	20.7	9	20.7	4	20.7	2
20.76	28	20.72	20	20.72	19	20.72	8	20.72	4	20.72	1
20.78	30	20.74	16	20.74	22	20.74	8	20.74	3	20.74	0
20.8	31	20.76	11	20.76	25	20.76	9	20.76	0	20.76	0
20.82	30	20.78	6	20.78	25	20.78	13	20.78	0	20.78	0
20.84	29	20.8	2	20.8	24	20.8	18	20.8	0	20.8	0
20.86	27	20.82	2	20.82	22	20.82	24	20.82	0	20.82	0
20.88	25	20.84	4	20.84	21	20.84	31	20.84	0	20.84	0
20.9	24	20.86	8	20.86	22	20.86	36	20.86	2	20.86	0
20.92	23	20.88	11	20.88	25	20.88	38	20.88	6	20.88	0
20.94	21	20.9	14	20.9	30	20.9	38	20.9	9	20.9	0
20.96	18	20.92	15	20.92	34	20.92	36	20.92	11	20.92	1
20.98	14	20.94	16	20.94	36	20.94	33	20.94	14	20.94	6
21	12	20.96	16	20.96	35	20.96	31	20.96	16	20.96	8
21.02	13	20.98	16	20.98	32	20.98	30	20.98	18	20.98	9
21.04	15	21	14	21	29	21	28	21	18	21	10
21.06	20	21.02	13	21.02	27	21.02	26	21.02	15	21.02	11
21.08	24	21.04	11	21.04	27	21.04	22	21.04	9	21.04	14
21.1	27	21.06	9	21.06	27	21.06	17	21.06	4	21.06	16
21.12	30	21.08	8	21.08	28	21.08	14	21.08	1	21.08	17
21.14	30	21.1	6	21.1	28	21.1	14	21.1	2	21.1	14
21.16	29	21.12	5	21.12	28	21.12	16	21.12	7	21.12	10
21.18	26	21.14	6	21.14	29	21.14	19	21.14	12	21.14	5
21.2	22	21.16	8	21.16	31	21.16	21	21.16	15	21.16	2
21.22	18	21.18	11	21.18	31	21.18	22	21.18	14	21.18	0
21.24	14	21.2	13	21.2	31	21.2	20	21.2	10	21.2	0
21.26	11	21.22	14	21.22	30	21.22	18	21.22	6	21.22	0
21.28	10	21.24	13	21.24	27	21.24	17	21.24	3	21.24	0
21.3	11	21.26	12	21.26	24	21.26	17	21.26	3	21.26	0
21.32	15	21.28	11	21.28	21	21.28	18	21.28	5	21.28	0
21.34	18	21.3	10	21.3	19	21.3	19	21.3	9	21.3	0
21.36	21	21.32	10	21.32	17	21.32	21	21.32	12	21.32	0
21.38	22	21.34	10	21.34	17	21.34	24	21.34	14	21.34	0
21.4	22	21.36	11	21.36	19	21.36	27	21.36	13	21.36	0
21.42	22	21.38	14	21.38	22	21.38	30	21.38	11	21.38	0
21.44	23	21.4	20	21.4	25	21.4	32	21.4	10	21.4	0
21.46	26	21.42	28	21.42	27	21.42	33	21.42	10	21.42	0
21.48	33	21.44	37	21.44	28	21.44	33	21.44	12	21.44	0
21.5	42	21.46	46	21.46	31	21.46	35	21.46	17	21.46	0
21.52	54	21.48	55	21.48	35	21.48	39	21.48	23	21.48	0
21.54	66	21.5	63	21.5	43	21.5	45	21.5	31	21.5	1
21.56	76	21.52	73	21.52	54	21.52	54	21.52	40	21.52	2
21.58	81	21.54	82	21.54	69	21.54	64	21.54	48	21.54	3
21.6	81	21.56	91	21.56	85	21.56	73	21.56	52	21.56	4
21.62	76	21.58	96	21.58	98	21.58	78	21.58	52	21.58	2
21.64	68	21.6	95	21.6	106	21.6	79	21.6	47	21.6	0
21.66	58	21.62	89	21.62	108	21.62	75	21.62	38	21.62	0
21.68	48	21.64	78	21.64	104	21.64	67	21.64	27	21.64	0
21.7	38	21.66	63	21.66	96	21.66	58	21.66	16	21.66	0
21.72	31	21.68	47	21.68	84	21.68	52	21.68	7	21.68	0
21.74	23	21.7	34	21.7	70	21.7	48	21.7	1	21.7	0
21.76	17	21.72	24	21.72	57	21.72	49	21.72	0	21.72	0
21.78	11	21.74	19	21.74	46	21.74	50	21.74	0	21.74	6
21.8	5	21.76	17	21.76	37	21.76	49	21.76	0	21.76	14
21.82	1	21.78	17	21.78	30	21.78	44	21.78	0	21.78	18
21.84	0	21.8	19	21.8	25	21.8	37	21.8	0	21.8	18
21.86	0	21.82	20	21.82	21	21.82	28	21.82	2	21.82	15
21.88	0	21.84	22	21.84	20	21.84	19	21.84	5	21.84	11
21.9	0	21.86	23	21.86	21	21.86	11	21.86	7	21.86	8
21.92	0	21.88	24	21.88	24	21.88	4	21.88	8	21.88	5
21.94	0	21.9	23	21.9	27	21.9	0	21.9	6	21.9	3
21.96	5	21.92	22	21.92	28	21.92	0	21.92	3	21.92	2
21.98	14	21.94	19	21.94	29	21.94	0	21.94	1	21.94	0
22	21	21.96	17	21.96	29	21.96	0	21.96	0	21.96	0
22.02	25	21.98	17	21.98	32	21.98	5	21.98	1	21.98	0
22.04	26	22	19	22	35	22	13	22	3	22	2
22.06	25	22.02	21	22.02	37	22.02	20	22.02	7	22.02	4
22.08	23	22.04	24	22.04	39	22.04	27	22.04	12	22.04	7
22.1	20	22.06	24	22.06	40	22.06	33	22.06	18	22.06	8
22.12	17	22.08	24	22.08	39	22.08	38	22.08	23	22.08	9
22.14	13	22.1	21	22.1	36	22.1	41	22.1	29	22.1	10
22.16	9	22.12	16	22.12	31	22.12	42	22.12	34	22.12	9
22.18	5	22.14	10	22.14	26	22.14	41	22.14	37	22.14	7
22.2	2	22.16	2	22.16	21	22.16	40	22.16	39	22.16	4
22.22	0	22.18	0	22.18	20	22.18	38	22.18	39	22.18	0
22.24	0	22.2	0	22.2	22	22.2	36	22.2	35	22.2	0
22.26	0	22.22	0	22.22	24	22.22	34	22.22	31	22.22	0
22.28	0	22.24	0	22.24	26	22.24	31	22.24	25	22.24	0
22.3	0	22.26	0	22.26	24	22.26	29	22.26	19	22.26	0
22.32	1	22.28	3	22.28	20	22.28	27	22.28	13	22.28	0
22.34	2	22.3	11	22.3	16	22.3	24	22.3	8	22.3	0
22.36	3	22.32	18	22.32	11	22.32	22	22.32	4	22.32	0
22.38	4	22.34	23	22.34	7	22.34	20	22.34	2	22.34	0
22.4	7	22.36	25	22.36	4	22.36	19	22.36	1	22.36	0
22.42	10	22.38	26	22.38	2	22.38	19	22.38	1	22.38	0
22.44	13	22.4	26	22.4	0	22.4	20	22.4	1	22.4	4
22.46	14	22.42	27	22.42	0	22.42	22	22.42	0	22.42	7
22.48	13	22.44	27	22.44	0	22.44	22	22.44	0	22.44	9
22.5	9	22.46	25	22.46	0	22.46	22	22.46	0	22.46	10
22.52	5	22.48	21	22.48	2	22.48	19	22.48	0	22.48	10
22.54	3	22.5	18	22.5	6	22.5	15	22.5	0	22.5	8
22.56	5	22.52	16	22.52	11	22.52	11	22.52	0	22.52	7
22.58	9	22.54	16	22.54	17	22.54	7	22.54	0	22.54	5
22.6	13	22.56	16	22.56	22	22.56	4	22.56	0	22.56	3
22.62	16	22.58	14	22.58	25	22.58	2	22.58	2	22.58	1
22.64	16	22.6	11	22.6	26	22.6	2	22.6	5	22.6	1
22.66	15	22.62	7	22.62	25	22.62	1	22.62	8	22.62	1
22.68	13	22.64	4	22.64	23	22.64	0	22.64	8	22.64	2
22.7	12	22.66	2	22.66	20	22.66	0	22.66	6	22.66	2
22.72	12	22.68	4	22.68	19	22.68	0	22.68	2	22.68	2
22.74	12	22.7	7	22.7	18	22.7	0	22.7	0	22.7	0
22.76	13	22.72	11	22.72	19	22.72	0	22.72	0	22.72	0
22.78	14	22.74	15	22.74	20	22.74	2	22.74	0	22.74	0
22.8	16	22.76	19	22.76	21	22.76	5	22.76	0	22.76	0
22.82	19	22.78	23	22.78	20	22.78	6	22.78	0	22.78	0
22.84	23	22.8	26	22.8	17	22.8	6	22.8	0	22.8	0
22.86	26	22.82	28	22.82	13	22.82	6	22.82	0	22.82	4
22.88	26	22.84	29	22.84	9	22.84	8	22.84	0	22.84	9
22.9	24	22.86	30	22.86	6	22.86	12	22.86	0	22.86	12
22.92	20	22.88	31	22.88	5	22.88	17	22.88	0	22.88	14
22.94	16	22.9	32	22.9	4	22.9	20	22.9	3	22.9	13
22.96	14	22.92	33	22.92	5	22.92	22	22.92	5	22.92	11
22.98	15	22.94	33	22.94	6	22.94	21	22.94	6	22.94	8
23	20	22.96	32	22.96	7	22.96	20	22.96	7	22.96	7
23.02	26	22.98	30	22.98	10	22.98	20	22.98	8	22.98	7
23.04	32	23	28	23	13	23	19	23	10	23	10
23.06	35	23.02	27	23.02	17	23.02	20	23.02	12	23.02	15
23.08	33	23.04	27	23.04	21	23.04	20	23.04	14	23.04	19
23.1	28	23.06	30	23.06	25	23.06	19	23.06	17	23.06	22
23.12	23	23.08	35	23.08	28	23.08	20	23.08	19	23.08	22
23.14	22	23.1	42	23.1	32	23.1	23	23.1	21	23.1	20
23.16	25	23.12	49	23.12	38	23.12	28	23.12	21	23.12	17
23.18	31	23.14	54	23.14	44	23.14	35	23.14	20	23.14	16
23.2	40	23.16	56	23.16	50	23.16	40	23.16	19	23.16	17
23.22	47	23.18	55	23.18	57	23.18	43	23.18	20	23.18	20
23.24	50	23.2	52	23.2	63	23.2	42	23.2	23	23.2	24
23.26	49	23.22	50	23.22	68	23.22	40	23.22	27	23.22	26
23.28	43	23.24	49	23.24	70	23.24	38	23.24	28	23.24	26
23.3	36	23.26	49	23.26	70	23.26	37	23.26	27	23.26	23
23.32	31	23.28	47	23.28	67	23.28	38	23.28	22	23.28	19
23.34	29	23.3	45	23.3	62	23.3	41	23.3	14	23.3	14
23.36	30	23.32	41	23.32	57	23.32	42	23.32	6	23.32	9
23.38	32	23.34	36	23.34	55	23.34	41	23.34	0	23.34	5
23.4	34	23.36	33	23.36	54	23.36	38	23.36	0	23.36	3
23.42	33	23.38	30	23.38	53	23.38	33	23.38	0	23.38	4
23.44	31	23.4	29	23.4	51	23.4	28	23.4	2	23.4	8
23.46	28	23.42	30	23.42	50	23.42	24	23.42	8	23.42	14
23.48	26	23.44	33	23.44	50	23.44	23	23.44	14	23.44	21
23.5	24	23.46	36	23.46	51	23.46	23	23.46	17	23.46	28
23.52	25	23.48	38	23.48	52	23.48	24	23.48	18	23.48	33
23.54	26	23.5	39	23.5	54	23.5	26	23.5	16	23.5	36
23.56	29	23.52	37	23.52	57	23.52	29	23.52	14	23.52	39
23.58	32	23.54	33	23.54	59	23.54	31	23.54	11	23.54	43
23.6	34	23.56	30	23.56	61	23.56	33	23.56	10	23.56	47
23.62	35	23.58	27	23.58	61	23.58	33	23.58	12	23.58	48
23.64	36	23.6	27	23.6	61	23.6	31	23.6	15	23.6	46
23.66	38	23.62	30	23.62	62	23.62	29	23.62	20	23.62	39
23.68	43	23.64	37	23.64	64	23.64	28	23.64	24	23.64	29
23.7	52	23.66	46	23.66	68	23.66	29	23.66	29	23.66	19
23.72	65	23.68	56	23.68	73	23.68	34	23.68	35	23.68	14
23.74	81	23.7	67	23.7	81	23.7	42	23.7	45	23.7	14
23.76	96	23.72	76	23.72	92	23.72	52	23.72	59	23.72	20
23.78	109	23.74	85	23.74	110	23.74	63	23.74	77	23.74	31
23.8	116	23.76	94	23.76	133	23.76	75	23.76	98	23.76	46
23.82	118	23.78	104	23.78	160	23.78	87	23.78	120	23.78	65
23.84	113	23.8	112	23.8	186	23.8	96	23.8	137	23.8	84
23.86	103	23.82	118	23.82	204	23.82	100	23.82	147	23.82	102
23.88	92	23.84	120	23.84	210	23.84	97	23.84	146	23.84	114
23.9	81	23.86	117	23.86	202	23.86	88	23.86	135	23.86	118
23.92	72	23.88	112	23.88	185	23.88	75	23.88	114	23.88	113
23.94	65	23.9	105	23.9	162	23.9	61	23.9	90	23.9	103
23.96	60	23.92	97	23.92	141	23.92	48	23.92	66	23.92	88
23.98	56	23.94	88	23.94	124	23.94	39	23.94	46	23.94	71
24	54	23.96	78	23.96	111	23.96	32	23.96	32	23.96	55
24.02	53	23.98	69	23.98	100	23.98	29	23.98	24	23.98	39
24.04	54	24	61	24	90	24	28	24	20	24	25
24.06	56	24.02	55	24.02	81	24.02	28	24.02	20	24.02	13
24.08	58	24.04	50	24.04	75	24.04	28	24.04	19	24.04	6
24.1	58	24.06	47	24.06	71	24.06	26	24.06	18	24.06	1
24.12	56	24.08	45	24.08	70	24.08	24	24.08	14	24.08	0
24.14	52	24.1	44	24.1	72	24.1	23	24.1	11	24.1	0
24.16	49	24.12	45	24.12	75	24.12	22	24.12	8	24.12	1
24.18	48	24.14	49	24.14	79	24.14	22	24.14	7	24.14	3
24.2	48	24.16	54	24.16	82	24.16	21	24.16	8	24.16	6
24.22	49	24.18	57	24.18	81	24.18	19	24.18	9	24.18	9
24.24	47	24.2	56	24.2	77	24.2	17	24.2	9	24.2	11
24.26	44	24.22	51	24.22	71	24.22	16	24.22	6	24.22	12
24.28	39	24.24	43	24.24	65	24.24	16	24.24	3	24.24	13
24.3	34	24.26	34	24.26	59	24.26	18	24.26	2	24.26	16
24.32	31	24.28	27	24.28	55	24.28	21	24.28	2	24.28	20
24.34	28	24.3	24	24.3	52	24.3	24	24.3	5	24.3	24
24.36	27	24.32	24	24.32	49	24.32	25	24.32	10	24.32	26
24.38	26	24.34	26	24.34	46	24.34	26	24.34	15	24.34	26
24.4	25	24.36	28	24.36	43	24.36	25	24.36	19	24.36	24
24.42	25	24.38	27	24.38	40	24.38	24	24.38	21	24.38	20
24.44	26	24.4	23	24.4	39	24.4	24	24.4	20	24.4	15
24.46	26	24.42	19	24.42	37	24.42	24	24.42	19	24.42	9
24.48	25	24.44	14	24.44	35	24.44	25	24.44	18	24.44	3
24.5	24	24.46	12	24.46	33	24.46	25	24.46	18	24.46	0
24.52	21	24.48	11	24.48	31	24.48	23	24.48	18	24.48	0
24.54	20	24.5	11	24.5	32	24.5	17	24.5	18	24.5	0
24.56	19	24.52	13	24.52	34	24.52	10	24.52	15	24.52	0
24.58	20	24.54	15	24.54	37	24.54	4	24.54	11	24.54	1
24.6	22	24.56	17	24.56	39	24.56	0	24.56	4	24.56	0
24.62	24	24.58	21	24.58	39	24.58	0	24.58	0	24.58	0
24.64	26	24.6	24	24.6	37	24.6	2	24.6	0	24.6	1
24.66	27	24.62	28	24.62	32	24.62	4	24.62	0	24.62	3
24.68	28	24.64	29	24.64	26	24.64	6	24.64	0	24.64	5
24.7	27	24.66	27	24.66	19	24.66	7	24.66	0	24.66	7
24.72	25	24.68	23	24.68	12	24.68	6	24.68	0	24.68	8
24.74	23	24.7	18	24.7	6	24.7	6	24.7	5	24.7	8
24.76	21	24.72	14	24.72	0	24.72	5	24.72	9	24.72	8
24.78	18	24.74	13	24.74	0	24.74	3	24.74	11	24.74	8
24.8	15	24.76	14	24.76	0	24.76	1	24.76	11	24.76	8
24.82	12	24.78	15	24.78	0	24.78	0	24.78	10	24.78	8
24.84	8	24.8	18	24.8	0	24.8	0	24.8	9	24.8	8
24.86	4	24.82	22	24.82	3	24.82	0	24.82	8	24.82	7
24.88	1	24.84	28	24.84	6	24.84	0	24.84	7	24.84	6
24.9	1	24.86	33	24.86	7	24.86	0	24.86	7	24.86	4
24.92	1	24.88	35	24.88	8	24.88	0	24.88	6	24.88	3
24.94	3	24.9	34	24.9	7	24.9	0	24.9	3	24.9	2
24.96	4	24.92	31	24.92	6	24.92	0	24.92	0	24.92	3
24.98	4	24.94	26	24.94	5	24.94	0	24.94	0	24.94	3
25	5	24.96	20	24.96	3	24.96	0	24.96	0	24.96	4
25.02	7	24.98	14	24.98	2	24.98	0	24.98	0	24.98	4
25.04	11	25	10	25	1	25	0	25	0	25	3
25.06	17	25.02	8	25.02	1	25.02	0	25.02	0	25.02	2
25.08	22	25.04	8	25.04	1	25.04	0	25.04	0	25.04	1
25.1	24	25.06	9	25.06	3	25.06	0	25.06	0	25.06	0
25.12	22	25.08	8	25.08	5	25.08	3	25.08	2	25.08	0
25.14	15	25.1	5	25.1	8	25.1	5	25.1	4	25.1	0
25.16	7	25.12	1	25.12	11	25.12	6	25.12	5	25.12	0
25.18	1	25.14	0	25.14	13	25.14	6	25.14	6	25.14	0
25.2	0	25.16	0	25.16	13	25.16	4	25.16	6	25.16	0
25.22	0	25.18	0	25.18	12	25.18	2	25.18	6	25.18	0
25.24	3	25.2	2	25.2	10	25.2	0	25.2	6	25.2	3
25.26	7	25.22	3	25.22	8	25.22	0	25.22	7	25.22	6
25.28	9	25.24	4	25.24	7	25.24	0	25.24	8	25.24	6
25.3	8	25.26	5	25.26	9	25.26	0	25.26	9	25.26	4
25.32	5	25.28	8	25.28	12	25.28	0	25.28	10	25.28	2
25.34	2	25.3	11	25.3	16	25.3	0	25.3	9	25.3	0
25.36	0	25.32	14	25.32	22	25.32	0	25.32	8	25.32	0
25.38	0	25.34	17	25.34	26	25.34	0	25.34	5	25.34	2
25.4	0	25.36	19	25.36	28	25.36	4	25.36	3	25.36	5
25.42	1	25.38	19	25.38	27	25.38	8	25.38	0	25.38	7
25.44	4	25.4	18	25.4	24	25.4	13	25.4	0	25.4	7
25.46	9	25.42	15	25.42	22	25.42	17	25.42	0	25.42	8
25.48	15	25.44	13	25.44	22	25.44	21	25.44	0	25.44	8
25.5	21	25.46	12	25.46	24	25.46	22	25.46	0	25.46	8
25.52	25	25.48	12	25.48	27	25.48	21	25.48	0	25.48	7
25.54	26	25.5	13	25.5	29	25.5	16	25.5	1	25.5	5
25.56	26	25.52	16	25.52	30	25.52	10	25.52	1	25.52	2
25.58	26	25.54	19	25.54	30	25.54	5	25.54	1	25.54	2
25.6	27	25.56	24	25.56	29	25.56	1	25.56	1	25.56	4
25.62	28	25.58	29	25.58	27	25.58	0	25.58	2	25.58	7
25.64	29	25.6	34	25.6	25	25.6	0	25.6	4	25.6	12
25.66	30	25.62	39	25.62	24	25.62	2	25.62	6	25.62	15
25.68	32	25.64	42	25.64	24	25.64	3	25.64	9	25.64	16
25.7	33	25.66	44	25.66	25	25.66	5	25.66	10	25.66	16
25.72	34	25.68	44	25.68	24	25.68	6	25.68	10	25.68	15
25.74	32	25.7	43	25.7	21	25.7	6	25.7	9	25.7	13
25.76	28	25.72	41	25.72	17	25.72	5	25.72	7	25.72	11
25.78	21	25.74	38	25.74	12	25.74	4	25.74	7	25.74	8
25.8	15	25.76	35	25.76	9	25.76	2	25.76	7	25.76	5
25.82	10	25.78	30	25.78	8	25.78	1	25.78	8	25.78	4
25.84	6	25.8	24	25.8	10	25.8	0	25.8	8	25.8	6
25.86	4	25.82	16	25.82	13	25.82	1	25.82	6	25.82	9
25.88	2	25.84	7	25.84	14	25.84	3	25.84	2	25.84	13
25.9	1	25.86	0	25.86	14	25.86	7	25.86	0	25.86	17
25.92	1	25.88	0	25.88	12	25.88	11	25.88	0	25.88	20
25.94	2	25.9	0	25.9	10	25.9	13	25.9	0	25.9	20
25.96	4	25.92	0	25.92	7	25.92	12	25.92	0	25.92	18
25.98	6	25.94	0	25.94	4	25.94	9	25.94	0	25.94	13
26	7	25.96	0	25.96	1	25.96	7	25.96	0	25.96	8
26.02	8	25.98	0	25.98	0	25.98	7	25.98	4	25.98	4
26.04	9	26	0	26	0	26	8	26	7	26	1
26.06	10	26.02	0	26.02	0	26.02	9	26.02	9	26.02	0
26.08	12	26.04	7	26.04	1	26.04	9	26.04	9	26.04	0
26.1	15	26.06	15	26.06	6	26.06	7	26.06	8	26.06	0
26.12	17	26.08	21	26.08	12	26.08	3	26.08	9	26.08	3
26.14	16	26.1	25	26.1	16	26.1	0	26.1	11	26.1	6
26.16	13	26.12	27	26.12	19	26.12	0	26.12	13	26.12	8
26.18	10	26.14	27	26.14	21	26.14	0	26.14	14	26.14	6
26.2	7	26.16	25	26.16	21	26.16	0	26.16	12	26.16	3
26.22	6	26.18	22	26.18	19	26.18	0	26.18	7	26.18	0
26.24	7	26.2	18	26.2	17	26.2	0	26.2	1	26.2	0
26.26	9	26.22	13	26.22	16	26.22	0	26.22	0	26.22	0
26.28	10	26.24	7	26.24	16	26.24	0	26.24	0	26.24	0
26.3	10	26.26	2	26.26	16	26.26	0	26.26	0	26.26	0
26.32	10	26.28	0	26.28	17	26.28	0	26.28	0	26.28	0
26.34	9	26.3	0	26.3	17	26.3	0	26.3	0	26.3	0
26.36	8	26.32	0	26.32	16	26.32	2	26.32	0	26.32	0
26.38	9	26.34	0	26.34	13	26.34	4	26.34	3	26.34	0
26.4	10	26.36	0	26.36	9	26.36	4	26.36	6	26.36	3
26.42	10	26.38	0	26.38	5	26.38	4	26.38	7	26.38	7
26.44	11	26.4	0	26.4	2	26.4	3	26.4	7	26.4	10
26.46	11	26.42	0	26.42	0	26.42	2	26.42	7	26.42	13
26.48	11	26.44	0	26.44	0	26.44	3	26.44	7	26.44	15
26.5	11	26.46	0	26.46	0	26.46	3	26.46	6	26.46	14
26.52	10	26.48	0	26.48	1	26.48	3	26.48	6	26.48	13
26.54	8	26.5	0	26.5	2	26.5	2	26.5	5	26.5	11
26.56	6	26.52	0	26.52	1	26.52	0	26.52	3	26.52	11
26.58	3	26.54	0	26.54	1	26.54	0	26.54	1	26.54	13
26.6	0	26.56	0	26.56	0	26.56	0	26.56	0	26.56	14
26.62	0	26.58	7	26.58	0	26.58	2	26.58	0	26.58	15
26.64	0	26.6	13	26.6	0	26.6	4	26.6	0	26.6	14
26.66	0	26.62	17	26.62	1	26.62	6	26.62	0	26.62	10
26.68	0	26.64	18	26.64	4	26.64	6	26.64	0	26.64	6
26.7	0	26.66	17	26.66	7	26.66	4	26.66	0	26.66	2
26.72	0	26.68	14	26.68	10	26.68	1	26.68	0	26.68	0
26.74	0	26.7	11	26.7	12	26.7	0	26.7	0	26.7	0
26.76	2	26.72	8	26.72	12	26.72	0	26.72	0	26.72	0
26.78	4	26.74	6	26.74	11	26.74	0	26.74	0	26.74	0
26.8	4	26.76	5	26.76	8	26.76	0	26.76	0	26.76	0
26.82	3	26.78	6	26.78	4	26.78	2	26.78	0	26.78	0
26.84	1	26.8	7	26.8	0	26.8	6	26.8	0	26.8	1
26.86	0	26.82	9	26.82	0	26.82	9	26.82	0	26.82	2
26.88	0	26.84	11	26.84	0	26.84	9	26.84	0	26.84	6
26.9	5	26.86	11	26.86	0	26.86	6	26.86	0	26.86	12
26.92	11	26.88	9	26.88	0	26.88	2	26.88	0	26.88	17
26.94	18	26.9	8	26.9	0	26.9	0	26.9	3	26.9	21
26.96	25	26.92	8	26.92	0	26.92	0	26.92	12	26.92	23
26.98	32	26.94	10	26.94	1	26.94	0	26.94	20	26.94	23
27	41	26.96	14	26.96	8	26.96	0	26.96	28	26.96	22
27.02	53	26.98	19	26.98	21	26.98	0	26.98	36	26.98	23
27.04	67	27	26	27	40	27	4	27	42	27	26
27.06	81	27.02	35	27.02	62	27.02	15	27.02	47	27.02	31
27.08	90	27.04	46	27.04	83	27.04	27	27.04	51	27.04	35
27.1	92	27.06	60	27.06	99	27.06	38	27.06	53	27.06	37
27.12	85	27.08	72	27.08	105	27.08	44	27.08	52	27.08	36
27.14	73	27.1	81	27.1	101	27.1	46	27.1	49	27.1	33
27.16	58	27.12	84	27.12	89	27.12	42	27.12	44	27.12	30
27.18	43	27.14	79	27.14	72	27.14	35	27.14	38	27.14	27
27.2	30	27.16	69	27.16	55	27.16	27	27.16	30	27.16	28
27.22	20	27.18	55	27.18	40	27.18	22	27.18	22	27.18	29
27.24	14	27.2	42	27.2	29	27.2	18	27.2	14	27.2	32
27.26	12	27.22	33	27.22	21	27.22	17	27.22	6	27.22	34
27.28	14	27.24	27	27.24	15	27.24	16	27.24	0	27.24	35
27.3	15	27.26	25	27.26	10	27.26	15	27.26	0	27.26	34
27.32	14	27.28	24	27.28	6	27.28	13	27.28	0	27.28	32
27.34	10	27.3	21	27.3	4	27.3	11	27.3	0	27.3	27
27.36	3	27.32	17	27.32	5	27.32	9	27.32	0	27.32	20
27.38	0	27.34	14	27.34	11	27.34	7	27.34	0	27.34	12
27.4	0	27.36	13	27.36	19	27.36	7	27.36	0	27.36	4
27.42	0	27.38	14	27.38	26	27.38	7	27.38	0	27.38	0
27.44	0	27.4	17	27.4	31	27.4	7	27.4	0	27.4	0
27.46	0	27.42	19	27.42	31	27.42	8	27.42	0	27.42	0
27.48	1	27.44	19	27.44	27	27.44	7	27.44	0	27.44	0
27.5	3	27.46	16	27.46	22	27.46	5	27.46	0	27.46	0
27.52	4	27.48	11	27.48	15	27.48	2	27.48	0	27.48	0
27.54	3	27.5	5	27.5	8	27.5	1	27.5	4	27.5	1
27.56	2	27.52	0	27.52	4	27.52	2	27.52	8	27.52	2
27.58	1	27.54	0	27.54	2	27.54	4	27.54	10	27.54	2
27.6	1	27.56	0	27.56	4	27.56	8	27.56	10	27.56	2
27.62	3	27.58	0	27.58	9	27.58	11	27.58	8	27.58	1
27.64	6	27.6	0	27.6	16	27.6	13	27.6	6	27.6	1
27.66	9	27.62	0	27.62	21	27.62	13	27.62	4	27.62	3
27.68	10	27.64	2	27.64	24	27.64	12	27.64	4	27.64	7
27.7	10	27.66	2	27.66	24	27.66	10	27.66	4	27.66	12
27.72	7	27.68	1	27.68	21	27.68	9	27.68	4	27.68	16
27.74	5	27.7	0	27.7	17	27.7	10	27.7	2	27.7	20
27.76	3	27.72	0	27.72	11	27.72	12	27.72	0	27.72	22
27.78	4	27.74	0	27.74	8	27.74	18	27.74	0	27.74	23
27.8	6	27.76	0	27.76	7	27.76	28	27.76	1	27.76	23
27.82	11	27.78	4	27.78	11	27.78	41	27.78	6	27.78	22
27.84	17	27.8	9	27.8	17	27.8	57	27.8	10	27.8	21
27.86	22	27.82	13	27.82	26	27.82	73	27.82	14	27.82	19
27.88	26	27.84	17	27.84	36	27.84	90	27.84	13	27.84	17
27.9	27	27.86	19	27.86	45	27.86	107	27.86	9	27.86	16
27.92	26	27.88	19	27.88	52	27.88	122	27.88	4	27.88	18
27.94	23	27.9	18	27.9	56	27.9	136	27.9	0	27.9	21
27.96	19	27.92	17	27.92	57	27.92	147	27.92	0	27.92	24
27.98	15	27.94	17	27.94	55	27.94	154	27.94	0	27.94	25
28	10	27.96	16	27.96	52	27.96	156	27.96	2	27.96	23
28.02	6	27.98	15	27.98	49	27.98	153	27.98	3	27.98	18
28.04	3	28	13	28	46	28	145	28	2	28	13
28.06	1	28.02	9	28.02	45	28.02	130	28.02	1	28.02	8
28.08	2	28.04	5	28.04	43	28.04	111	28.04	0	28.04	4
28.1	4	28.06	1	28.06	41	28.06	87	28.06	0	28.06	3
28.12	7	28.08	0	28.08	37	28.08	63	28.08	0	28.08	3
28.14	9	28.1	0	28.1	33	28.1	43	28.1	0	28.1	3
28.16	11	28.12	0	28.12	28	28.12	28	28.12	0	28.12	4
28.18	12	28.14	0	28.14	22	28.14	21	28.14	0	28.14	4
28.2	12	28.16	0	28.16	18	28.16	19	28.16	0	28.16	5
28.22	13	28.18	0	28.18	14	28.18	20	28.18	0	28.18	6
28.24	13	28.2	0	28.2	12	28.2	23	28.2	0	28.2	7
28.26	12	28.22	0	28.22	12	28.22	27	28.22	1	28.22	8
28.28	8	28.24	0	28.24	14	28.24	30	28.24	5	28.24	9
28.3	2	28.26	0	28.26	18	28.26	31	28.26	9	28.26	8
28.32	0	28.28	0	28.28	22	28.28	32	28.28	12	28.28	7
28.34	0	28.3	0	28.3	23	28.3	32	28.3	15	28.3	4
28.36	0	28.32	0	28.32	21	28.32	31	28.32	16	28.32	3
28.38	0	28.34	0	28.34	16	28.34	30	28.34	15	28.34	2
28.4	0	28.36	0	28.36	9	28.36	29	28.36	12	28.36	2
28.42	0	28.38	2	28.38	4	28.38	26	28.38	8	28.38	2
28.44	2	28.4	4	28.4	0	28.4	21	28.4	6	28.4	1
28.46	5	28.42	6	28.42	0	28.42	14	28.42	5	28.42	0
28.48	7	28.44	9	28.44	0	28.44	7	28.44	5	28.44	0
28.5	7	28.46	10	28.46	0	28.46	1	28.46	5	28.46	0
28.52	4	28.48	10	28.48	0	28.48	0	28.48	4	28.48	0
28.54	0	28.5	8	28.5	0	28.5	0	28.5	2	28.5	1
28.56	0	28.52	4	28.52	2	28.52	0	28.52	0	28.52	4
28.58	0	28.54	0	28.54	5	28.54	0	28.54	0	28.54	9
28.6	0	28.56	0	28.56	7	28.56	5	28.56	0	28.56	14
28.62	0	28.58	0	28.58	8	28.58	11	28.58	2	28.58	16
28.64	0	28.6	0	28.6	9	28.6	15	28.6	6	28.6	17
28.66	0	28.62	0	28.62	10	28.62	16	28.62	11	28.62	15
28.68	0	28.64	0	28.64	11	28.64	15	28.64	14	28.64	14
28.7	0	28.66	1	28.66	13	28.66	12	28.66	15	28.66	14
28.72	0	28.68	1	28.68	14	28.68	9	28.68	13	28.68	14
28.74	2	28.7	0	28.7	17	28.7	8	28.7	9	28.7	12
28.76	6	28.72	0	28.72	19	28.72	7	28.72	4	28.72	10
28.78	9	28.74	0	28.74	22	28.74	8	28.74	0	28.74	7
28.8	11	28.76	0	28.76	24	28.76	9	28.76	0	28.76	3
28.82	11	28.78	0	28.78	25	28.78	11	28.78	0	28.78	1
28.84	9	28.8	0	28.8	24	28.8	12	28.8	0	28.8	0
28.86	6	28.82	2	28.82	22	28.82	10	28.82	0	28.82	0
28.88	3	28.84	4	28.84	19	28.84	6	28.84	1	28.84	0
28.9	0	28.86	5	28.86	15	28.86	0	28.86	3	28.86	0
28.92	0	28.88	3	28.88	12	28.88	0	28.88	5	28.88	0
28.94	0	28.9	0	28.9	9	28.9	0	28.9	5	28.9	1
28.96	0	28.92	0	28.92	7	28.92	0	28.92	5	28.92	2
28.98	0	28.94	0	28.94	5	28.94	0	28.94	5	28.94	4
29	0	28.96	0	28.96	5	28.96	0	28.96	4	28.96	7
29.02	0	28.98	0	28.98	5	28.98	5	28.98	1	28.98	11
29.04	0	29	0	29	7	29	10	29	0	29	14
29.06	0	29.02	0	29.02	8	29.02	15	29.02	0	29.02	17
29.08	0	29.04	0	29.04	9	29.04	17	29.04	0	29.04	17
29.1	0	29.06	2	29.06	7	29.06	17	29.06	0	29.06	15
29.12	0	29.08	9	29.08	4	29.08	15	29.08	0	29.08	11
29.14	0	29.1	14	29.1	1	29.1	11	29.1	0	29.1	7
29.16	0	29.12	15	29.12	0	29.12	9	29.12	0	29.12	5
29.18	0	29.14	13	29.14	0	29.14	8	29.14	0	29.14	4
29.2	0	29.16	8	29.16	0	29.16	8	29.16	0	29.16	4
29.22	2	29.18	1	29.18	0	29.18	8	29.18	0	29.18	6
29.24	3	29.2	0	29.2	0	29.2	8	29.2	0	29.2	7
29.26	3	29.22	0	29.22	0	29.22	7	29.22	0	29.22	8
29.28	3	29.24	0	29.24	0	29.24	6	29.24	0	29.24	8
29.3	3	29.26	0	29.26	0	29.26	5	29.26	1	29.26	7
29.32	3	29.28	0	29.28	0	29.28	6	29.28	1	29.28	5
29.34	1	29.3	0	29.3	0	29.3	6	29.3	1	29.3	4
29.36	0	29.32	0	29.32	0	29.32	5	29.32	0	29.32	3
29.38	0	29.34	0	29.34	5	29.34	4	29.34	0	29.34	4
29.4	0	29.36	0	29.36	8	29.36	2	29.36	0	29.36	7
29.42	0	29.38	0	29.38	10	29.38	1	29.38	0	29.38	11
29.44	0	29.4	0	29.4	10	29.4	0	29.4	0	29.4	16
29.46	0	29.42	0	29.42	12	29.42	0	29.42	0	29.42	19
29.48	0	29.44	0	29.44	14	29.44	2	29.44	0	29.44	20
29.5	0	29.46	0	29.46	18	29.46	6	29.46	2	29.46	19
29.52	0	29.48	0	29.48	22	29.48	10	29.48	6	29.48	18
29.54	0	29.5	0	29.5	24	29.5	14	29.5	9	29.5	17
29.56	0	29.52	0	29.52	25	29.52	16	29.52	10	29.52	16
29.58	0	29.54	2	29.54	25	29.54	16	29.54	9	29.54	16
29.6	0	29.56	8	29.56	26	29.56	15	29.56	6	29.56	16
29.62	0	29.58	11	29.58	26	29.58	13	29.58	3	29.58	15
29.64	0	29.6	12	29.6	25	29.6	11	29.6	0	29.6	13
29.66	0	29.62	12	29.62	23	29.62	6	29.62	0	29.62	9
29.68	0	29.64	11	29.64	20	29.64	1	29.64	2	29.64	5
29.7	0	29.66	10	29.66	16	29.66	0	29.66	6	29.66	2
29.72	0	29.68	8	29.68	15	29.68	0	29.68	10	29.68	2
29.74	0	29.7	7	29.7	16	29.7	0	29.7	13	29.7	5
29.76	2	29.72	9	29.72	21	29.72	0	29.72	14	29.72	9
29.78	3	29.74	13	29.74	27	29.74	0	29.74	12	29.74	11
29.8	2	29.76	18	29.76	32	29.76	0	29.76	11	29.76	12
29.82	0	29.78	22	29.78	35	29.78	2	29.78	12	29.78	10
29.84	0	29.8	24	29.8	35	29.8	3	29.8	15	29.8	9
29.86	0	29.82	23	29.82	32	29.82	2	29.82	20	29.82	10
29.88	7	29.84	21	29.84	29	29.84	2	29.84	25	29.84	13
29.9	19	29.86	20	29.86	28	29.86	4	29.86	29	29.86	16
29.92	36	29.88	22	29.88	30	29.88	10	29.88	31	29.88	18
29.94	54	29.9	27	29.9	34	29.9	18	29.9	31	29.9	20
29.96	72	29.92	35	29.92	43	29.92	30	29.92	33	29.92	22
29.98	88	29.94	48	29.94	54	29.94	43	29.94	40	29.94	24
30	101	29.96	64	29.96	69	29.96	60	29.96	53	29.96	28
30.02	109	29.98	83	29.98	86	29.98	78	29.98	70	29.98	34
30.04	113	30	102	30	105	30	94	30	88	30	41
30.06	115	30.02	117	30.02	123	30.02	107	30.02	101	30.02	48
30.08	116	30.04	126	30.04	137	30.04	113	30.04	109	30.04	55
30.1	117	30.06	130	30.06	148	30.06	112	30.06	112	30.06	61
30.12	118	30.08	130	30.08	153	30.08	106	30.08	110	30.08	65
30.14	123	30.1	129	30.1	153	30.1	99	30.1	107	30.1	67
30.16	135	30.12	131	30.12	149	30.12	95	30.12	104	30.12	67
30.18	156	30.14	136	30.14	146	30.14	96	30.14	106	30.14	66
30.2	185	30.16	148	30.16	149	30.16	106	30.16	115	30.16	69
30.22	220	30.18	167	30.18	162	30.18	128	30.18	135	30.18	77
30.24	254	30.2	196	30.2	186	30.2	162	30.2	166	30.2	95
30.26	286	30.22	235	30.22	221	30.22	205	30.22	207	30.22	122
30.28	318	30.24	282	30.24	260	30.24	252	30.24	252	30.24	157
30.3	356	30.26	331	30.26	298	30.26	297	30.26	297	30.26	198
30.32	407	30.28	376	30.28	333	30.28	336	30.28	341	30.28	246
30.34	473	30.3	418	30.3	365	30.3	371	30.3	390	30.3	300
30.36	553	30.32	460	30.32	402	30.32	407	30.32	450	30.32	366
30.38	636	30.34	510	30.34	453	30.34	446	30.34	494	30.34	446
30.4	709	30.36	571	30.36	467	30.36	486	30.36	613	30.36	535
30.42	861	30.38	638	30.38	609	30.38	520	30.38	697	30.38	620
30.44	904	30.4	701	30.4	698	30.4	537	30.4	940	30.4	816
30.46	740	30.42	746	30.42	870	30.42	531	30.42	951	30.42	883
30.48	680	30.44	883	30.44	907	30.44	500	30.44	793	30.44	744
30.5	596	30.46	822	30.46	889	30.46	450	30.46	679	30.46	617
30.52	503	30.48	702	30.48	771	30.48	389	30.48	592	30.48	533
30.54	410	30.5	631	30.5	697	30.5	325	30.5	499	30.5	442
30.56	328	30.52	546	30.52	602	30.52	264	30.52	410	30.52	353
30.58	262	30.54	458	30.54	498	30.54	209	30.54	332	30.54	273
30.6	213	30.56	376	30.56	398	30.56	165	30.56	267	30.56	206
30.62	180	30.58	303	30.58	313	30.58	133	30.58	216	30.58	154
30.64	162	30.6	245	30.6	248	30.6	111	30.6	178	30.6	120
30.66	158	30.62	203	30.62	203	30.62	99	30.62	151	30.62	100
30.68	167	30.64	176	30.64	177	30.64	94	30.64	135	30.64	92
30.7	191	30.66	163	30.66	169	30.66	94	30.66	128	30.66	92
30.72	227	30.68	164	30.68	180	30.68	100	30.68	131	30.68	98
30.74	271	30.7	179	30.7	211	30.7	114	30.7	146	30.7	114
30.76	314	30.72	205	30.72	264	30.72	136	30.72	174	30.72	140
30.78	347	30.74	242	30.74	337	30.74	164	30.74	212	30.74	178
30.8	364	30.76	283	30.76	419	30.76	192	30.76	254	30.76	225
30.82	360	30.78	321	30.78	498	30.78	214	30.78	290	30.78	272
30.84	338	30.8	347	30.8	639	30.8	226	30.8	312	30.8	307
30.86	305	30.82	358	30.82	671	30.82	224	30.82	315	30.82	323
30.88	267	30.84	351	30.84	570	30.84	211	30.84	302	30.84	318
30.9	229	30.86	329	30.86	530	30.86	190	30.86	279	30.86	295
30.92	196	30.88	296	30.88	471	30.88	165	30.88	250	30.88	261
30.94	168	30.9	256	30.9	404	30.9	139	30.9	220	30.9	223
30.96	148	30.92	217	30.92	338	30.92	116	30.92	191	30.92	186
30.98	136	30.94	183	30.94	280	30.94	98	30.94	165	30.94	154
31	135	30.96	157	30.96	233	30.96	86	30.96	146	30.96	128
31.02	143	30.98	141	30.98	200	30.98	83	30.98	136	30.98	112
31.04	159	31	135	31	181	31	88	31	135	31	106
31.06	179	31.02	140	31.02	177	31.02	100	31.02	144	31.02	112
31.08	201	31.04	153	31.04	184	31.04	118	31.04	163	31.04	132
31.1	221	31.06	175	31.06	199	31.06	139	31.06	189	31.06	163
31.12	239	31.08	203	31.08	219	31.08	161	31.08	218	31.08	202
31.14	251	31.1	233	31.1	240	31.1	183	31.1	245	31.1	242
31.16	255	31.12	261	31.12	260	31.12	203	31.12	268	31.12	277
31.18	250	31.14	282	31.14	279	31.14	218	31.14	284	31.14	304
31.2	237	31.16	293	31.16	295	31.16	225	31.16	294	31.16	321
31.22	218	31.18	292	31.18	305	31.18	223	31.18	295	31.18	327
31.24	195	31.2	279	31.2	302	31.2	211	31.2	285	31.2	320
31.26	171	31.22	259	31.22	286	31.22	190	31.22	264	31.22	299
31.28	145	31.24	232	31.24	258	31.24	164	31.24	234	31.24	267
31.3	120	31.26	203	31.26	222	31.26	136	31.26	200	31.26	227
31.32	98	31.28	173	31.28	183	31.28	109	31.28	165	31.28	186
31.34	78	31.3	145	31.3	146	31.3	83	31.3	132	31.3	147
31.36	62	31.32	119	31.32	114	31.32	60	31.32	102	31.32	113
31.38	50	31.34	96	31.34	88	31.34	42	31.34	79	31.34	85
31.4	43	31.36	77	31.36	69	31.36	28	31.36	61	31.36	62
31.42	40	31.38	62	31.38	56	31.38	18	31.38	48	31.38	44
31.44	41	31.4	50	31.4	47	31.4	12	31.4	39	31.4	30
31.46	43	31.42	43	31.42	40	31.42	9	31.42	30	31.42	19
31.48	43	31.44	37	31.44	33	31.44	10	31.44	23	31.44	12
31.5	40	31.46	34	31.46	26	31.46	11	31.46	17	31.46	7
31.52	35	31.48	31	31.48	21	31.48	13	31.48	13	31.48	4
31.54	29	31.5	30	31.5	16	31.5	14	31.5	10	31.5	2
31.56	25	31.52	28	31.52	14	31.52	13	31.52	9	31.52	1
31.58	22	31.54	27	31.54	14	31.54	11	31.54	7	31.54	1
31.6	20	31.56	26	31.56	15	31.56	8	31.56	6	31.56	2
31.62	20	31.58	24	31.58	18	31.58	6	31.58	6	31.58	3
31.64	20	31.6	23	31.6	20	31.6	4	31.6	6	31.6	3
31.66	21	31.62	22	31.62	23	31.62	3	31.62	6	31.62	3
31.68	22	31.64	22	31.64	25	31.64	3	31.64	8	31.64	3
31.7	24	31.66	23	31.66	27	31.66	3	31.66	10	31.66	5
31.72	26	31.68	23	31.68	30	31.68	4	31.68	14	31.68	9
31.74	28	31.7	23	31.7	34	31.7	6	31.7	21	31.7	14
31.76	31	31.72	22	31.72	38	31.72	11	31.72	31	31.72	22
31.78	34	31.74	24	31.74	41	31.74	17	31.74	44	31.74	33
31.8	38	31.76	27	31.76	42	31.76	25	31.76	59	31.76	47
31.82	42	31.78	31	31.78	43	31.78	33	31.78	75	31.78	64
31.84	44	31.8	35	31.8	45	31.8	42	31.8	90	31.8	81
31.86	44	31.82	36	31.82	47	31.82	52	31.82	104	31.82	96
31.88	44	31.84	36	31.84	51	31.84	62	31.84	113	31.84	107
31.9	44	31.86	36	31.86	54	31.86	69	31.86	117	31.86	113
31.92	44	31.88	36	31.88	57	31.88	74	31.88	115	31.88	113
31.94	46	31.9	37	31.9	59	31.9	76	31.9	108	31.9	109
31.96	48	31.92	38	31.92	62	31.92	75	31.92	97	31.92	102
31.98	52	31.94	38	31.94	65	31.94	73	31.94	83	31.94	94
32	57	31.96	37	31.96	69	31.96	71	31.96	68	31.96	84
32.02	63	31.98	37	31.98	73	31.98	69	31.98	53	31.98	76
32.04	72	32	39	32	77	32	66	32	40	32	71
32.06	83	32.02	44	32.02	81	32.02	63	32.02	32	32.02	70
32.08	96	32.04	53	32.04	86	32.04	61	32.04	30	32.04	76
32.1	111	32.06	66	32.06	92	32.06	61	32.06	31	32.06	89
32.12	129	32.08	82	32.08	102	32.08	65	32.08	37	32.08	108
32.14	148	32.1	99	32.1	116	32.1	73	32.1	44	32.1	130
32.16	169	32.12	118	32.12	134	32.12	87	32.12	55	32.12	153
32.18	194	32.14	139	32.14	157	32.14	105	32.14	68	32.14	174
32.2	226	32.16	163	32.16	182	32.16	126	32.16	84	32.16	190
32.22	267	32.18	191	32.18	210	32.18	149	32.18	103	32.18	199
32.24	318	32.2	223	32.2	239	32.2	174	32.2	124	32.2	201
32.26	378	32.22	263	32.22	272	32.22	204	32.22	147	32.22	197
32.28	441	32.24	312	32.24	316	32.24	239	32.24	174	32.24	191
32.3	499	32.26	373	32.26	373	32.26	281	32.26	206	32.26	187
32.32	540	32.28	444	32.28	442	32.28	326	32.28	241	32.28	186
32.34	560	32.3	515	32.3	514	32.3	365	32.3	275	32.3	189
32.36	559	32.32	575	32.32	624	32.32	391	32.32	301	32.32	192
32.38	542	32.34	715	32.34	666	32.34	401	32.34	314	32.34	193
32.4	519	32.36	622	32.36	626	32.36	397	32.36	315	32.36	189
32.42	496	32.38	607	32.38	614	32.38	382	32.38	309	32.38	183
32.44	478	32.4	577	32.4	587	32.4	365	32.4	302	32.4	176
32.46	470	32.42	540	32.42	553	32.42	349	32.42	301	32.42	173
32.48	474	32.44	505	32.44	522	32.44	341	32.44	314	32.44	178
32.5	492	32.46	481	32.46	503	32.46	349	32.46	349	32.46	197
32.52	521	32.48	477	32.48	506	32.48	376	32.48	368	32.48	237
32.54	553	32.5	496	32.5	479	32.5	422	32.5	500	32.5	304
32.56	579	32.52	537	32.52	590	32.52	481	32.52	607	32.52	364
32.58	591	32.54	589	32.54	657	32.54	540	32.54	714	32.54	501
32.6	583	32.56	637	32.56	722	32.56	586	32.56	904	32.56	604
32.62	555	32.58	668	32.58	834	32.58	673	32.58	958	32.58	814
32.64	511	32.6	673	32.6	835	32.6	601	32.6	890	32.6	863
32.66	457	32.62	649	32.62	759	32.62	568	32.62	817	32.62	747
32.68	397	32.64	601	32.64	707	32.64	516	32.64	753	32.64	677
32.7	337	32.66	534	32.66	633	32.66	452	32.66	670	32.66	616
32.72	280	32.68	459	32.68	545	32.68	385	32.68	578	32.68	546
32.74	228	32.7	383	32.7	451	32.7	320	32.7	486	32.7	474
32.76	182	32.72	312	32.72	362	32.72	261	32.72	400	32.72	408
32.78	143	32.74	250	32.74	284	32.74	212	32.74	326	32.74	351
32.8	112	32.76	198	32.76	222	32.76	172	32.76	265	32.76	303
32.82	87	32.78	157	32.78	177	32.78	141	32.78	215	32.78	264
32.84	70	32.8	126	32.8	144	32.8	117	32.8	175	32.8	232
32.86	58	32.82	102	32.82	122	32.82	97	32.82	143	32.82	201
32.88	50	32.84	85	32.84	106	32.84	80	32.84	117	32.84	170
32.9	48	32.86	73	32.86	93	32.86	65	32.86	96	32.86	140
32.92	49	32.88	64	32.88	82	32.88	52	32.88	79	32.88	112
32.94	51	32.9	59	32.9	71	32.9	41	32.9	64	32.9	90
32.96	53	32.92	55	32.92	61	32.92	33	32.92	51	32.92	72
32.98	52	32.94	51	32.94	51	32.94	27	32.94	40	32.94	58
33	48	32.96	44	32.96	42	32.96	22	32.96	31	32.96	47
33.02	44	32.98	35	32.98	34	32.98	18	32.98	23	32.98	37
33.04	40	33	27	33	28	33	13	33	16	33	28
33.06	37	33.02	22	33.02	22	33.02	8	33.02	12	33.02	20
33.08	36	33.04	22	33.04	18	33.04	3	33.04	9	33.04	14
33.1	36	33.06	25	33.06	15	33.06	0	33.06	7	33.06	10
33.12	38	33.08	30	33.08	15	33.08	0	33.08	5	33.08	8
33.14	40	33.1	36	33.1	17	33.1	0	33.1	3	33.1	6
33.16	44	33.12	41	33.12	22	33.12	0	33.12	1	33.12	3
33.18	47	33.14	46	33.14	27	33.14	0	33.14	0	33.14	2
33.2	50	33.16	50	33.16	33	33.16	0	33.16	0	33.16	2
33.22	52	33.18	52	33.18	39	33.18	0	33.18	1	33.18	4
33.24	53	33.2	52	33.2	44	33.2	0	33.2	6	33.2	6
33.26	55	33.22	52	33.22	48	33.22	7	33.22	13	33.22	8
33.28	59	33.24	53	33.24	53	33.24	16	33.24	20	33.24	9
33.3	66	33.26	57	33.26	57	33.26	27	33.26	28	33.26	11
33.32	75	33.28	64	33.28	63	33.28	41	33.28	37	33.28	16
33.34	88	33.3	74	33.3	71	33.3	57	33.3	49	33.3	26
33.36	101	33.32	86	33.32	81	33.32	76	33.32	66	33.32	43
33.38	114	33.34	100	33.34	97	33.34	99	33.34	90	33.34	68
33.4	125	33.36	116	33.36	116	33.36	126	33.36	123	33.36	102
33.42	132	33.38	134	33.38	140	33.38	154	33.38	161	33.38	143
33.44	135	33.4	152	33.4	165	33.4	179	33.4	198	33.4	188
33.46	134	33.42	167	33.42	189	33.42	196	33.42	228	33.42	228
33.48	130	33.44	175	33.44	208	33.44	204	33.44	245	33.44	255
33.5	123	33.46	176	33.46	217	33.46	203	33.46	246	33.46	265
33.52	114	33.48	168	33.48	217	33.48	196	33.48	234	33.48	260
33.54	102	33.5	156	33.5	209	33.5	188	33.5	215	33.5	245
33.56	88	33.52	141	33.52	195	33.52	177	33.52	191	33.52	223
33.58	74	33.54	124	33.54	177	33.54	166	33.54	166	33.54	198
33.6	61	33.56	107	33.56	157	33.56	152	33.56	140	33.56	172
33.62	50	33.58	93	33.58	135	33.58	137	33.58	116	33.58	149
33.64	42	33.6	81	33.6	113	33.6	121	33.6	94	33.6	130
33.66	38	33.62	72	33.62	94	33.62	106	33.62	75	33.62	116
33.68	35	33.64	66	33.64	78	33.64	91	33.64	58	33.64	103
33.7	34	33.66	60	33.66	65	33.66	78	33.66	43	33.66	90
33.72	34	33.68	54	33.68	54	33.68	66	33.68	31	33.68	76
33.74	34	33.7	47	33.7	44	33.7	56	33.7	22	33.7	61
33.76	34	33.72	39	33.72	35	33.72	47	33.72	15	33.72	47
33.78	33	33.74	32	33.74	27	33.74	40	33.74	11	33.74	35
33.8	32	33.76	25	33.76	20	33.76	33	33.76	8	33.76	25
33.82	29	33.78	21	33.78	15	33.78	26	33.78	5	33.78	18
33.84	27	33.8	20	33.8	14	33.8	19	33.8	1	33.8	13
33.86	24	33.82	21	33.82	14	33.82	12	33.82	0	33.82	10
33.88	22	33.84	24	33.84	15	33.84	7	33.84	0	33.84	8
33.9	22	33.86	28	33.86	15	33.86	5	33.86	0	33.86	8
33.92	24	33.88	30	33.88	13	33.88	6	33.88	0	33.88	8
33.94	28	33.9	30	33.9	11	33.9	10	33.9	0	33.9	9
33.96	33	33.92	30	33.92	10	33.92	15	33.92	6	33.92	10
33.98	37	33.94	30	33.94	14	33.94	21	33.94	13	33.94	11
34	39	33.96	31	33.96	21	33.96	27	33.96	19	33.96	14
34.02	39	33.98	35	33.98	31	33.98	33	33.98	23	33.98	21
34.04	39	34	40	34	42	34	41	34	28	34	32
34.06	40	34.02	45	34.02	51	34.02	50	34.02	34	34.02	46
34.08	43	34.04	49	34.04	58	34.04	59	34.04	41	34.04	63
34.1	46	34.06	49	34.06	63	34.06	69	34.06	50	34.06	80
34.12	46	34.08	47	34.08	66	34.08	79	34.08	57	34.08	96
34.14	44	34.1	44	34.1	67	34.1	89	34.1	62	34.1	109
34.16	39	34.12	41	34.12	67	34.12	97	34.12	63	34.12	118
34.18	35	34.14	39	34.14	66	34.14	101	34.14	63	34.14	121
34.2	32	34.16	36	34.16	66	34.16	101	34.16	60	34.16	118
34.22	34	34.18	34	34.18	65	34.18	97	34.18	57	34.18	113
34.24	38	34.2	32	34.2	65	34.2	90	34.2	53	34.2	106
34.26	43	34.22	30	34.22	63	34.22	84	34.22	52	34.22	101
34.28	50	34.24	28	34.24	62	34.24	80	34.24	55	34.24	101
34.3	57	34.26	27	34.26	61	34.26	82	34.26	65	34.26	107
34.32	67	34.28	28	34.28	62	34.28	90	34.28	84	34.28	119
34.34	82	34.3	31	34.3	67	34.3	104	34.3	109	34.3	136
34.36	105	34.32	41	34.32	75	34.32	122	34.32	138	34.32	155
34.38	137	34.34	58	34.34	90	34.34	143	34.34	167	34.34	174
34.4	179	34.36	83	34.36	115	34.36	169	34.36	194	34.36	191
34.42	231	34.38	119	34.38	154	34.38	205	34.38	220	34.38	206
34.44	287	34.4	169	34.4	213	34.4	254	34.4	249	34.4	221
34.46	338	34.42	234	34.42	292	34.42	316	34.42	282	34.42	237
34.48	378	34.44	310	34.44	385	34.44	383	34.44	317	34.44	251
34.5	404	34.46	387	34.46	477	34.46	441	34.46	348	34.46	260
34.52	415	34.48	540	34.48	682	34.48	604	34.48	365	34.48	261
34.54	415	34.5	575	34.5	746	34.5	488	34.5	364	34.5	254
34.56	405	34.52	504	34.52	594	34.52	470	34.52	347	34.52	238
34.58	386	34.54	491	34.54	568	34.54	432	34.54	319	34.54	217
34.6	361	34.56	460	34.56	525	34.56	385	34.56	286	34.56	194
34.62	336	34.58	418	34.58	474	34.58	336	34.58	255	34.58	170
34.64	314	34.6	374	34.6	422	34.6	291	34.6	227	34.6	148
34.66	298	34.62	334	34.62	376	34.62	254	34.62	204	34.62	129
34.68	286	34.64	304	34.64	342	34.64	229	34.64	188	34.64	117
34.7	276	34.66	289	34.66	325	34.66	217	34.66	180	34.66	116
34.72	265	34.68	285	34.68	322	34.68	214	34.68	178	34.68	126
34.74	251	34.7	288	34.7	325	34.7	216	34.7	180	34.7	145
34.76	236	34.72	290	34.72	323	34.72	216	34.72	182	34.72	164
34.78	220	34.74	285	34.74	310	34.74	211	34.74	179	34.74	177
34.8	203	34.76	271	34.76	289	34.76	200	34.76	172	34.76	181
34.82	187	34.78	250	34.78	262	34.78	185	34.78	161	34.78	176
34.84	173	34.8	225	34.8	236	34.8	168	34.8	149	34.8	166
34.86	163	34.82	200	34.82	214	34.82	152	34.82	137	34.82	155
34.88	158	34.84	176	34.84	196	34.84	139	34.84	129	34.84	147
34.9	161	34.86	158	34.86	182	34.86	133	34.86	126	34.86	143
34.92	172	34.88	146	34.88	173	34.88	135	34.88	131	34.88	143
34.94	190	34.9	142	34.9	171	34.9	146	34.9	144	34.9	149
34.96	213	34.92	147	34.92	178	34.92	166	34.92	168	34.92	164
34.98	236	34.94	160	34.94	194	34.94	193	34.94	204	34.94	190
35	254	34.96	181	34.96	219	34.96	226	34.96	250	34.96	231
35.02	265	34.98	207	34.98	249	34.98	259	34.98	302	34.98	283
35.04	268	35	233	35	280	35	287	35	350	35	338
35.06	263	35.02	255	35.02	305	35.02	304	35.02	384	35.02	414
35.08	252	35.04	268	35.04	321	35.04	307	35.04	399	35.04	405
35.1	235	35.06	272	35.06	324	35.06	298	35.06	395	35.06	406
35.12	214	35.08	266	35.08	314	35.08	279	35.08	377	35.08	387
35.14	191	35.1	255	35.1	298	35.1	253	35.1	351	35.1	357
35.16	172	35.12	240	35.12	277	35.12	226	35.12	321	35.12	320
35.18	160	35.14	224	35.14	257	35.14	202	35.14	288	35.14	278
35.2	155	35.16	210	35.16	240	35.16	185	35.16	255	35.16	236
35.22	157	35.18	199	35.18	224	35.18	174	35.18	224	35.18	197
35.24	162	35.2	192	35.2	210	35.2	167	35.2	197	35.2	166
35.26	168	35.22	187	35.22	198	35.22	163	35.22	176	35.22	144
35.28	172	35.24	184	35.24	188	35.24	160	35.24	162	35.24	132
35.3	174	35.26	182	35.26	180	35.26	156	35.26	154	35.26	125
35.32	174	35.28	180	35.28	175	35.28	151	35.28	149	35.28	121
35.34	173	35.3	176	35.3	171	35.3	143	35.3	144	35.3	117
35.36	170	35.32	171	35.32	166	35.32	133	35.32	137	35.32	111
35.38	166	35.34	163	35.34	158	35.34	122	35.34	127	35.34	103
35.4	160	35.36	154	35.36	149	35.36	112	35.36	117	35.36	96
35.42	152	35.38	146	35.38	140	35.38	101	35.38	106	35.38	88
35.44	143	35.4	138	35.4	135	35.4	92	35.4	95	35.4	79
35.46	132	35.42	132	35.42	131	35.42	84	35.42	85	35.42	70
35.48	120	35.44	128	35.44	130	35.44	77	35.44	77	35.44	60
35.5	110	35.46	124	35.46	129	35.46	70	35.46	71	35.46	53
35.52	104	35.48	120	35.48	128	35.48	66	35.48	69	35.48	48
35.54	101	35.5	116	35.5	127	35.5	64	35.5	70	35.5	46
35.56	100	35.52	112	35.52	126	35.52	65	35.52	74	35.52	48
35.58	98	35.54	107	35.54	123	35.54	66	35.54	78	35.54	52
35.6	95	35.56	102	35.56	119	35.56	68	35.56	82	35.56	59
35.62	89	35.58	97	35.58	112	35.58	69	35.58	84	35.58	66
35.64	81	35.6	91	35.6	103	35.6	68	35.6	82	35.6	73
35.66	71	35.62	86	35.62	92	35.62	65	35.62	77	35.62	77
35.68	61	35.64	80	35.64	80	35.64	60	35.64	69	35.64	76
35.7	52	35.66	74	35.66	67	35.66	53	35.66	60	35.66	72
35.72	45	35.68	69	35.68	56	35.68	44	35.68	52	35.68	64
35.74	42	35.7	62	35.7	45	35.7	34	35.7	45	35.7	53
35.76	42	35.72	55	35.72	34	35.72	24	35.72	39	35.72	41
35.78	44	35.74	48	35.74	25	35.74	15	35.74	34	35.74	29
35.8	48	35.76	42	35.76	18	35.76	9	35.76	30	35.76	18
35.82	51	35.78	40	35.78	14	35.78	6	35.78	27	35.78	11
35.84	54	35.8	43	35.8	15	35.8	8	35.8	25	35.8	8
35.86	55	35.82	50	35.82	19	35.82	11	35.82	24	35.82	10
35.88	55	35.84	56	35.84	28	35.84	15	35.84	24	35.84	15
35.9	56	35.86	61	35.86	38	35.86	18	35.86	27	35.86	23
35.92	58	35.88	63	35.88	49	35.88	19	35.88	32	35.88	34
35.94	60	35.9	63	35.9	56	35.9	20	35.9	39	35.9	46
35.96	62	35.92	62	35.92	59	35.92	20	35.92	47	35.92	58
35.98	63	35.94	61	35.94	60	35.94	21	35.94	55	35.94	68
36	61	35.96	61	35.96	59	35.96	24	35.96	60	35.96	74
36.02	57	35.98	61	35.98	59	35.98	28	35.98	62	35.98	77
36.04	52	36	62	36	61	36	35	36	62	36	76
36.06	47	36.02	64	36.02	65	36.02	42	36.02	61	36.02	73
36.08	44	36.04	65	36.04	69	36.04	49	36.04	59	36.04	68
36.1	42	36.06	64	36.06	70	36.06	54	36.06	57	36.06	62
36.12	42	36.08	62	36.08	67	36.08	58	36.08	53	36.08	54
36.14	42	36.1	57	36.1	60	36.1	59	36.1	49	36.1	45
36.16	42	36.12	52	36.12	52	36.12	57	36.12	44	36.12	34
36.18	41	36.14	49	36.14	44	36.14	53	36.14	39	36.14	24
36.2	40	36.16	47	36.16	39	36.16	47	36.16	33	36.16	16
36.22	40	36.18	46	36.18	34	36.18	41	36.18	26	36.18	9
36.24	42	36.2	44	36.2	30	36.2	34	36.2	20	36.2	5
36.26	45	36.22	41	36.22	27	36.22	28	36.22	17	36.22	3
36.28	48	36.24	37	36.24	26	36.24	24	36.24	15	36.24	3
36.3	51	36.26	34	36.26	26	36.26	21	36.26	15	36.26	3
36.32	52	36.28	32	36.28	29	36.28	20	36.28	16	36.28	4
36.34	51	36.3	32	36.3	32	36.3	19	36.3	16	36.3	6
36.36	49	36.32	31	36.32	35	36.32	18	36.32	15	36.32	7
36.38	47	36.34	30	36.34	37	36.34	16	36.34	12	36.34	8
36.4	43	36.36	26	36.36	35	36.36	13	36.36	9	36.36	7
36.42	40	36.38	21	36.38	31	36.38	11	36.38	6	36.38	6
36.44	36	36.4	17	36.4	26	36.4	8	36.4	5	36.4	3
36.46	31	36.42	15	36.42	20	36.42	6	36.42	5	36.42	0
36.48	26	36.44	15	36.44	14	36.44	4	36.44	6	36.44	0
36.5	22	36.46	15	36.46	10	36.46	3	36.46	6	36.46	0
36.52	20	36.48	14	36.48	7	36.48	3	36.48	6	36.48	0
36.54	20	36.5	13	36.5	5	36.5	4	36.5	6	36.5	0
36.56	22	36.52	12	36.52	5	36.52	5	36.52	6	36.52	0
36.58	25	36.54	12	36.54	8	36.54	7	36.54	8	36.54	4
36.6	30	36.56	14	36.56	12	36.56	8	36.56	13	36.56	10
36.62	39	36.58	17	36.58	19	36.58	11	36.58	20	36.58	16
36.64	51	36.6	22	36.6	27	36.6	17	36.6	29	36.6	22
36.66	67	36.62	30	36.62	37	36.62	26	36.62	41	36.62	28
36.68	88	36.64	41	36.64	49	36.64	38	36.64	55	36.64	36
36.7	113	36.66	56	36.66	66	36.66	54	36.66	74	36.66	49
36.72	145	36.68	76	36.68	88	36.68	78	36.68	99	36.68	69
36.74	180	36.7	103	36.7	118	36.7	111	36.7	134	36.7	98
36.76	215	36.72	139	36.72	156	36.72	153	36.72	180	36.72	139
36.78	245	36.74	184	36.74	202	36.74	200	36.74	233	36.74	186
36.8	265	36.76	234	36.76	251	36.76	246	36.76	287	36.76	232
36.82	275	36.78	281	36.78	299	36.78	284	36.78	332	36.78	268
36.84	276	36.8	318	36.8	336	36.8	307	36.8	358	36.8	290
36.86	270	36.82	340	36.82	360	36.82	314	36.82	365	36.82	296
36.88	258	36.84	348	36.84	368	36.84	306	36.84	354	36.84	294
36.9	242	36.86	343	36.86	365	36.86	287	36.86	333	36.86	286
36.92	219	36.88	329	36.88	352	36.88	262	36.88	306	36.88	275
36.94	193	36.9	305	36.9	331	36.9	233	36.9	276	36.9	259
36.96	165	36.92	274	36.92	300	36.92	203	36.92	243	36.92	237
36.98	139	36.94	239	36.94	262	36.94	173	36.94	208	36.94	211
37	118	36.96	203	36.96	222	36.96	147	36.96	174	36.96	185
37.02	101	36.98	172	36.98	184	36.98	127	36.98	145	36.98	162
37.04	89	37	145	37	152	37	111	37	124	37	145
37.06	80	37.02	124	37.02	124	37.02	101	37.02	110	37.02	133
37.08	73	37.04	107	37.04	102	37.04	95	37.04	102	37.04	125
37.1	69	37.06	93	37.06	86	37.06	92	37.06	100	37.06	122
37.12	65	37.08	82	37.08	77	37.08	92	37.08	101	37.08	122
37.14	63	37.1	73	37.1	72	37.1	93	37.1	102	37.1	123
37.16	59	37.12	67	37.12	71	37.12	95	37.12	102	37.12	124
37.18	56	37.14	65	37.14	70	37.14	96	37.14	101	37.14	123
37.2	53	37.16	65	37.16	68	37.16	96	37.16	97	37.16	121
37.22	51	37.18	67	37.18	66	37.18	94	37.18	93	37.18	118
37.24	53	37.2	68	37.2	63	37.2	92	37.2	90	37.2	114
37.26	59	37.22	68	37.22	62	37.22	91	37.22	89	37.22	111
37.28	67	37.24	66	37.24	62	37.24	92	37.24	92	37.24	111
37.3	75	37.26	65	37.26	66	37.26	94	37.26	98	37.26	114
37.32	80	37.28	66	37.28	74	37.28	95	37.28	105	37.28	121
37.34	83	37.3	68	37.3	82	37.3	94	37.3	111	37.3	128
37.36	82	37.32	71	37.32	89	37.32	90	37.32	113	37.32	132
37.38	79	37.34	72	37.34	91	37.34	83	37.34	111	37.34	130
37.4	76	37.36	71	37.36	89	37.36	76	37.36	104	37.36	123
37.42	72	37.38	69	37.38	84	37.38	69	37.38	95	37.38	113
37.44	69	37.4	68	37.4	80	37.4	63	37.4	85	37.4	101
37.46	67	37.42	69	37.42	79	37.42	59	37.42	75	37.42	90
37.48	66	37.44	71	37.44	81	37.44	57	37.44	67	37.44	81
37.5	64	37.46	72	37.46	86	37.46	54	37.46	60	37.46	73
37.52	62	37.48	71	37.48	91	37.48	51	37.48	54	37.48	65
37.54	59	37.5	68	37.5	92	37.5	48	37.5	49	37.5	57
37.56	55	37.52	62	37.52	89	37.52	44	37.52	46	37.52	49
37.58	51	37.54	55	37.54	83	37.54	40	37.54	44	37.54	42
37.6	48	37.56	48	37.56	75	37.56	36	37.56	41	37.56	37
37.62	44	37.58	42	37.58	66	37.58	33	37.58	37	37.58	34
37.64	41	37.6	38	37.6	58	37.6	31	37.6	32	37.6	32
37.66	38	37.62	36	37.62	51	37.62	29	37.62	27	37.62	31
37.68	37	37.64	35	37.64	47	37.64	29	37.64	23	37.64	28
37.7	37	37.66	34	37.66	44	37.66	29	37.66	22	37.66	25
37.72	38	37.68	32	37.68	43	37.68	30	37.68	24	37.68	20
37.74	40	37.7	29	37.7	43	37.7	32	37.7	28	37.7	16
37.76	40	37.72	28	37.72	43	37.72	34	37.72	32	37.72	13
37.78	39	37.74	27	37.74	41	37.74	35	37.74	34	37.74	11
37.8	38	37.76	28	37.76	39	37.76	35	37.76	35	37.76	10
37.82	36	37.78	30	37.78	36	37.78	33	37.78	35	37.78	11
37.84	34	37.8	32	37.8	35	37.8	32	37.8	35	37.8	13
37.86	32	37.82	33	37.82	34	37.82	32	37.82	37	37.82	17
37.88	29	37.84	34	37.84	35	37.84	35	37.84	40	37.84	23
37.9	28	37.86	34	37.86	37	37.86	39	37.86	44	37.86	31
37.92	28	37.88	34	37.88	40	37.88	44	37.88	48	37.88	40
37.94	27	37.9	35	37.9	43	37.9	49	37.9	51	37.9	47
37.96	26	37.92	36	37.92	45	37.92	52	37.92	52	37.92	52
37.98	24	37.94	36	37.94	47	37.94	52	37.94	51	37.94	51
38	21	37.96	35	37.96	46	37.96	48	37.96	48	37.96	46
38.02	18	37.98	32	37.98	44	37.98	42	37.98	45	37.98	38
38.04	17	38	26	38	41	38	33	38	41	38	30
38.06	18	38.02	20	38.02	38	38.02	24	38.02	36	38.02	23
38.08	20	38.04	12	38.04	36	38.04	13	38.04	30	38.04	17
38.1	22	38.06	5	38.06	33	38.06	4	38.06	23	38.06	13
38.12	24	38.08	0	38.08	29	38.08	0	38.08	16	38.08	9
38.14	24	38.1	0	38.1	24	38.1	0	38.1	9	38.1	6
38.16	23	38.12	0	38.12	17	38.12	0	38.12	5	38.12	3
38.18	20	38.14	0	38.14	11	38.14	0	38.14	2	38.14	0
38.2	16	38.16	0	38.16	6	38.16	0	38.16	0	38.16	0
38.22	13	38.18	5	38.18	3	38.18	0	38.18	0	38.18	0
38.24	10	38.2	8	38.2	1	38.2	0	38.2	0	38.2	0
38.26	10	38.22	10	38.22	0	38.22	0	38.22	1	38.22	0
38.28	10	38.24	10	38.24	0	38.24	0	38.24	2	38.24	0
38.3	10	38.26	10	38.26	1	38.26	0	38.26	1	38.26	0
38.32	10	38.28	9	38.28	1	38.28	1	38.28	0	38.28	0
38.34	9	38.3	8	38.3	1	38.3	0	38.3	0	38.3	0
38.36	7	38.32	7	38.32	0	38.32	0	38.32	0	38.32	0
38.38	4	38.34	5	38.34	0	38.34	0	38.34	0	38.34	0
38.4	1	38.36	2	38.36	0	38.36	0	38.36	0	38.36	0
38.42	0	38.38	0	38.38	0	38.38	0	38.38	0	38.38	0
38.44	0	38.4	0	38.4	0	38.4	0	38.4	0	38.4	0
38.46	0	38.42	0	38.42	0	38.42	0	38.42	0	38.42	0
38.48	0	38.44	0	38.44	1	38.44	0	38.44	0	38.44	0
38.5	0	38.46	0	38.46	2	38.46	0	38.46	0	38.46	1
38.52	0	38.48	0	38.48	2	38.48	0	38.48	4	38.48	4
38.54	0	38.5	0	38.5	1	38.5	0	38.5	7	38.5	7
38.56	0	38.52	0	38.52	0	38.52	0	38.52	11	38.52	10
38.58	4	38.54	0	38.54	0	38.54	0	38.54	14	38.54	12
38.6	8	38.56	0	38.56	0	38.56	1	38.56	18	38.56	14
38.62	12	38.58	1	38.58	1	38.58	2	38.58	20	38.58	15
38.64	17	38.6	2	38.6	3	38.6	4	38.6	22	38.6	16
38.66	21	38.62	4	38.62	6	38.62	7	38.62	24	38.62	16
38.68	24	38.64	6	38.64	10	38.64	10	38.64	27	38.64	16
38.7	26	38.66	8	38.66	14	38.66	15	38.66	31	38.66	16
38.72	28	38.68	12	38.68	18	38.68	19	38.68	36	38.68	15
38.74	31	38.7	17	38.7	21	38.7	23	38.7	41	38.7	15
38.76	32	38.72	22	38.72	24	38.72	24	38.72	46	38.72	17
38.78	32	38.74	27	38.74	26	38.74	23	38.74	51	38.74	20
38.8	32	38.76	32	38.76	29	38.76	22	38.76	55	38.76	24
38.82	31	38.78	37	38.78	32	38.78	23	38.78	58	38.78	28
38.84	32	38.8	44	38.8	38	38.8	26	38.8	60	38.8	30
38.86	34	38.82	52	38.82	45	38.82	30	38.82	61	38.82	31
38.88	37	38.84	59	38.84	52	38.84	33	38.84	59	38.84	31
38.9	41	38.86	64	38.86	57	38.86	33	38.86	54	38.86	28
38.92	43	38.88	64	38.88	59	38.88	31	38.88	46	38.88	23
38.94	44	38.9	60	38.9	57	38.9	27	38.9	36	38.9	18
38.96	42	38.92	54	38.92	52	38.92	23	38.92	26	38.92	12
38.98	38	38.94	46	38.94	45	38.94	20	38.94	18	38.94	7
39	34	38.96	38	38.96	37	38.96	17	38.96	12	38.96	3
39.02	31	38.98	31	38.98	29	38.98	16	38.98	7	38.98	0
39.04	27	39	24	39	21	39	15	39	2	39	0
39.06	24	39.02	19	39.02	13	39.02	15	39.02	0	39.02	0
39.08	20	39.04	13	39.04	5	39.04	13	39.04	0	39.04	0
39.1	16	39.06	7	39.06	0	39.06	12	39.06	0	39.06	0
39.12	11	39.08	1	39.08	0	39.08	10	39.08	0	39.08	0
39.14	5	39.1	0	39.1	0	39.1	8	39.1	0	39.1	0
39.16	0	39.12	0	39.12	0	39.12	7	39.12	0	39.12	0
39.18	0	39.14	0	39.14	0	39.14	7	39.14	0	39.14	0
39.2	0	39.16	0	39.16	0	39.16	5	39.16	0	39.16	0
39.22	0	39.18	0	39.18	0	39.18	3	39.18	2	39.18	0
39.24	0	39.2	0	39.2	0	39.2	1	39.2	3	39.2	1
39.26	0	39.22	0	39.22	0	39.22	0	39.22	5	39.22	3
39.28	0	39.24	0	39.24	0	39.24	0	39.24	6	39.24	3
39.3	0	39.26	0	39.26	0	39.26	0	39.26	7	39.26	4
39.32	0	39.28	0	39.28	0	39.28	0	39.28	8	39.28	4
39.34	0	39.3	0	39.3	4	39.3	0	39.3	8	39.3	4
39.36	0	39.32	0	39.32	6	39.32	2	39.32	7	39.32	4
39.38	0	39.34	0	39.34	6	39.34	4	39.34	6	39.34	4
39.4	0	39.36	0	39.36	5	39.36	6	39.36	4	39.36	3
39.42	0	39.38	0	39.38	3	39.38	7	39.38	3	39.38	2
39.44	1	39.4	0	39.4	1	39.4	8	39.4	2	39.4	1
39.46	2	39.42	1	39.42	0	39.42	8	39.42	1	39.42	0
39.48	2	39.44	0	39.44	0	39.44	9	39.44	0	39.44	0
39.5	0	39.46	0	39.46	0	39.46	10	39.46	0	39.46	0
39.52	0	39.48	0	39.48	0	39.48	11	39.48	0	39.48	1
39.54	0	39.5	0	39.5	0	39.5	11	39.5	0	39.5	3
39.56	0	39.52	0	39.52	0	39.52	9	39.52	0	39.52	4
39.58	0	39.54	0	39.54	0	39.54	8	39.54	0	39.54	5
39.6	0	39.56	0	39.56	0	39.56	6	39.56	0	39.56	5
39.62	0	39.58	0	39.58	0	39.58	6	39.58	0	39.58	5
39.64	0	39.6	0	39.6	0	39.6	7	39.6	0	39.6	5
39.66	0	39.62	0	39.62	0	39.62	7	39.62	2	39.62	6
39.68	0	39.64	0	39.64	0	39.64	7	39.64	6	39.64	7
39.7	0	39.66	0	39.66	0	39.66	6	39.66	9	39.66	8
39.72	0	39.68	0	39.68	0	39.68	5	39.68	12	39.68	8
39.74	0	39.7	0	39.7	0	39.7	2	39.7	13	39.7	8
39.76	0	39.72	0	39.72	0	39.72	0	39.72	14	39.72	8
39.78	0	39.74	0	39.74	0	39.74	0	39.74	14	39.74	8
39.8	0	39.76	0	39.76	0	39.76	0	39.76	12	39.76	9
39.82	0	39.78	2	39.78	0	39.78	1	39.78	10	39.78	12
39.84	0	39.8	4	39.8	0	39.8	3	39.8	8	39.8	14
39.86	0	39.82	4	39.82	0	39.82	5	39.82	7	39.82	17
39.88	0	39.84	4	39.84	0	39.84	6	39.84	8	39.84	19
39.9	0	39.86	2	39.86	0	39.86	6	39.86	10	39.86	19
39.92	0	39.88	0	39.88	0	39.88	5	39.88	14	39.88	17
39.94	0	39.9	0	39.9	0	39.9	3	39.9	17	39.9	13
39.96	1	39.92	0	39.92	5	39.92	2	39.92	19	39.92	9
39.98	1	39.94	0	39.94	9	39.94	1	39.94	21	39.94	6
40	3	39.96	0	39.96	12	39.96	2	39.96	22	39.96	5
40.02	7	39.98	0	39.98	13	39.98	3	39.98	23	39.98	7
40.04	12	40	1	40	12	40	7	40	24	40	10
40.06	19	40.02	2	40.02	11	40.02	11	40.02	26	40.02	15
40.08	27	40.04	3	40.04	12	40.04	18	40.04	29	40.04	20
40.1	35	40.06	5	40.06	15	40.06	27	40.06	34	40.06	27
40.12	43	40.08	9	40.08	21	40.08	38	40.08	41	40.08	36
40.14	51	40.1	14	40.1	29	40.1	49	40.1	50	40.1	49
40.16	57	40.12	23	40.12	39	40.12	61	40.12	63	40.12	66
40.18	61	40.14	34	40.14	49	40.14	70	40.14	76	40.14	87
40.2	63	40.16	46	40.16	58	40.16	77	40.16	90	40.16	109
40.22	64	40.18	59	40.18	66	40.18	80	40.18	100	40.18	129
40.24	64	40.2	71	40.2	71	40.2	81	40.2	107	40.2	142
40.26	62	40.22	79	40.22	75	40.22	80	40.22	110	40.22	145
40.28	58	40.24	84	40.24	77	40.24	78	40.24	109	40.24	141
40.3	52	40.26	84	40.26	77	40.26	77	40.26	107	40.26	134
40.32	44	40.28	79	40.28	75	40.28	76	40.28	103	40.28	126
40.34	36	40.3	72	40.3	70	40.3	75	40.3	98	40.3	118
40.36	31	40.32	63	40.32	62	40.32	72	40.32	89	40.32	108
40.38	28	40.34	54	40.34	54	40.34	67	40.34	79	40.34	97
40.4	27	40.36	48	40.36	46	40.36	61	40.36	68	40.36	83
40.42	28	40.38	43	40.38	39	40.38	55	40.38	57	40.38	69
40.44	29	40.4	41	40.4	33	40.4	49	40.4	48	40.4	57
40.46	30	40.42	40	40.42	28	40.42	44	40.42	40	40.42	46
40.48	31	40.44	39	40.44	23	40.44	38	40.44	33	40.44	38
40.5	31	40.46	37	40.46	17	40.46	32	40.46	28	40.46	31
40.52	28	40.48	34	40.48	12	40.48	26	40.48	24	40.48	25
40.54	23	40.5	28	40.5	8	40.5	21	40.5	22	40.5	20
40.56	18	40.52	22	40.52	5	40.52	17	40.52	22	40.52	19
40.58	13	40.54	16	40.54	5	40.54	13	40.54	22	40.54	21
40.6	11	40.56	12	40.56	7	40.56	10	40.56	22	40.56	27
40.62	11	40.58	10	40.58	10	40.58	8	40.58	21	40.58	35
40.64	13	40.6	11	40.6	14	40.6	8	40.6	20	40.6	43
40.66	17	40.62	14	40.62	18	40.62	10	40.62	20	40.62	48
40.68	21	40.64	18	40.64	23	40.64	15	40.64	22	40.64	48
40.7	24	40.66	22	40.66	27	40.66	20	40.66	23	40.66	45
40.72	26	40.68	25	40.68	32	40.68	26	40.68	25	40.68	41
40.74	27	40.7	27	40.7	35	40.7	32	40.7	28	40.7	37
40.76	28	40.72	29	40.72	36	40.72	36	40.72	30	40.72	36
40.78	30	40.74	30	40.74	36	40.74	39	40.74	33	40.74	37
40.8	33	40.76	32	40.76	35	40.76	42	40.76	35	40.76	39
40.82	37	40.78	35	40.78	34	40.78	43	40.78	36	40.78	40
40.84	42	40.8	39	40.8	35	40.8	45	40.8	35	40.8	41
40.86	49	40.82	43	40.82	37	40.82	46	40.82	35	40.82	42
40.88	57	40.84	48	40.84	40	40.84	47	40.84	35	40.84	43
40.9	66	40.86	53	40.86	45	40.86	49	40.86	37	40.86	44
40.92	76	40.88	57	40.88	50	40.88	51	40.88	40	40.88	46
40.94	87	40.9	61	40.9	57	40.9	54	40.9	46	40.9	49
40.96	101	40.92	66	40.92	64	40.92	59	40.92	53	40.92	53
40.98	119	40.94	71	40.94	72	40.94	65	40.94	63	40.94	60
41	140	40.96	80	40.96	81	40.96	74	40.96	77	40.96	71
41.02	163	40.98	93	40.98	92	40.98	88	40.98	95	40.98	87
41.04	185	41	112	41	107	41	107	41	118	41	110
41.06	202	41.02	135	41.02	125	41.02	129	41.02	145	41.02	139
41.08	213	41.04	161	41.04	146	41.04	152	41.04	173	41.04	171
41.1	218	41.06	186	41.06	167	41.06	170	41.06	197	41.06	199
41.12	218	41.08	206	41.08	183	41.08	180	41.08	213	41.08	217
41.14	215	41.1	219	41.1	192	41.1	181	41.1	218	41.1	221
41.16	209	41.12	226	41.12	193	41.12	175	41.12	212	41.12	213
41.18	202	41.14	227	41.14	188	41.14	164	41.14	199	41.14	196
41.2	192	41.16	224	41.16	179	41.16	149	41.16	184	41.16	176
41.22	178	41.18	215	41.18	169	41.18	131	41.18	169	41.18	156
41.24	163	41.2	201	41.2	158	41.2	111	41.2	154	41.2	135
41.26	148	41.22	182	41.22	145	41.22	89	41.22	137	41.22	113
41.28	135	41.24	160	41.24	130	41.24	67	41.24	119	41.24	92
41.3	123	41.26	139	41.26	115	41.26	48	41.26	101	41.26	73
41.32	113	41.28	120	41.28	101	41.28	35	41.28	86	41.28	60
41.34	102	41.3	104	41.3	90	41.3	28	41.3	75	41.3	52
41.36	92	41.32	92	41.32	83	41.32	28	41.32	67	41.32	49
41.38	84	41.34	82	41.34	77	41.34	31	41.34	62	41.34	48
41.4	78	41.36	74	41.36	72	41.36	37	41.36	59	41.36	48
41.42	77	41.38	68	41.38	67	41.38	43	41.38	58	41.38	46
41.44	81	41.4	64	41.4	62	41.4	49	41.4	59	41.4	45
41.46	87	41.42	63	41.42	57	41.42	55	41.42	61	41.42	46
41.48	96	41.44	65	41.44	55	41.44	62	41.44	64	41.44	48
41.5	106	41.46	70	41.46	58	41.46	71	41.46	70	41.46	52
41.52	115	41.48	81	41.48	67	41.48	83	41.48	78	41.48	56
41.54	122	41.5	98	41.5	84	41.5	96	41.5	88	41.5	59
41.56	127	41.52	120	41.52	106	41.52	110	41.52	98	41.52	60
41.58	129	41.54	144	41.54	129	41.54	120	41.54	105	41.54	62
41.6	129	41.56	165	41.56	149	41.56	126	41.56	108	41.56	63
41.62	128	41.58	177	41.58	162	41.58	126	41.58	105	41.58	64
41.64	124	41.6	179	41.6	165	41.6	121	41.6	99	41.6	63
41.66	117	41.62	174	41.62	159	41.62	114	41.62	92	41.62	61
41.68	108	41.64	165	41.64	148	41.64	106	41.64	84	41.64	57
41.7	96	41.66	155	41.66	135	41.66	97	41.66	76	41.66	54
41.72	84	41.68	144	41.68	123	41.68	89	41.68	68	41.68	51
41.74	71	41.7	132	41.7	109	41.7	81	41.7	60	41.7	47
41.76	61	41.72	118	41.72	95	41.72	73	41.72	52	41.72	43
41.78	53	41.74	103	41.74	79	41.74	66	41.74	46	41.74	38
41.8	48	41.76	88	41.76	64	41.76	59	41.76	40	41.76	33
41.82	46	41.78	76	41.78	52	41.78	54	41.78	36	41.78	29
41.84	45	41.8	67	41.8	41	41.8	49	41.8	33	41.8	28
41.86	46	41.82	60	41.82	35	41.82	44	41.82	31	41.82	29
41.88	49	41.84	55	41.84	31	41.84	41	41.84	31	41.84	32
41.9	52	41.86	51	41.86	31	41.86	40	41.86	34	41.86	37
41.92	58	41.88	50	41.88	34	41.88	41	41.88	40	41.88	43
41.94	64	41.9	50	41.9	41	41.9	45	41.9	48	41.9	51
41.96	71	41.92	52	41.92	50	41.92	52	41.92	59	41.92	61
41.98	77	41.94	56	41.94	60	41.94	61	41.94	72	41.94	73
42	81	41.96	61	41.96	70	41.96	71	41.96	87	41.96	88
42.02	83	41.98	68	41.98	79	41.98	80	41.98	101	41.98	105
42.04	81	42	75	42	86	42	87	42	112	42	121
42.06	77	42.02	80	42.02	91	42.02	91	42.02	117	42.02	133
42.08	73	42.04	84	42.04	93	42.04	92	42.04	116	42.04	136
42.1	70	42.06	86	42.06	92	42.06	91	42.06	109	42.06	131
42.12	67	42.08	87	42.08	88	42.08	88	42.08	99	42.08	120
42.14	64	42.1	85	42.1	81	42.1	86	42.1	88	42.1	107
42.16	61	42.12	82	42.12	73	42.12	83	42.12	78	42.12	95
42.18	59	42.14	76	42.14	65	42.14	78	42.14	70	42.14	84
42.2	57	42.16	70	42.16	57	42.16	71	42.16	62	42.16	73
42.22	55	42.18	63	42.18	51	42.18	63	42.18	54	42.18	62
42.24	53	42.2	58	42.2	47	42.2	55	42.2	49	42.2	51
42.26	50	42.22	55	42.22	45	42.22	49	42.22	46	42.22	40
42.28	47	42.24	53	42.24	44	42.24	45	42.24	45	42.24	32
42.3	43	42.26	54	42.26	43	42.26	41	42.26	45	42.26	27
42.32	39	42.28	54	42.28	41	42.28	37	42.28	44	42.28	25
42.34	37	42.3	55	42.3	38	42.3	33	42.3	40	42.3	24
42.36	37	42.32	55	42.32	34	42.32	29	42.32	34	42.32	22
42.38	36	42.34	53	42.34	31	42.34	25	42.34	28	42.34	19
42.4	36	42.36	49	42.36	29	42.36	24	42.36	24	42.36	15
42.42	33	42.38	45	42.38	29	42.38	23	42.38	22	42.38	13
42.44	30	42.4	39	42.4	28	42.4	22	42.4	23	42.4	12
42.46	25	42.42	33	42.42	25	42.42	21	42.42	27	42.42	12
42.48	19	42.44	28	42.44	20	42.44	20	42.44	31	42.44	14
42.5	14	42.46	24	42.46	13	42.46	18	42.46	35	42.46	16
42.52	10	42.48	20	42.48	6	42.48	17	42.48	38	42.48	17
42.54	8	42.5	16	42.5	1	42.5	18	42.5	39	42.5	19
42.56	6	42.52	12	42.52	0	42.52	20	42.52	38	42.52	21
42.58	6	42.54	8	42.54	0	42.54	23	42.54	38	42.54	22
42.6	6	42.56	5	42.56	0	42.56	26	42.56	36	42.56	22
42.62	6	42.58	4	42.58	0	42.58	28	42.58	34	42.58	19
42.64	6	42.6	3	42.6	1	42.6	29	42.6	31	42.6	15
42.66	5	42.62	2	42.62	3	42.62	31	42.62	28	42.62	9
42.68	2	42.64	1	42.64	6	42.64	33	42.64	24	42.64	5
42.7	0	42.66	0	42.66	8	42.66	34	42.66	20	42.66	3
42.72	0	42.68	0	42.68	9	42.68	33	42.68	15	42.68	3
42.74	0	42.7	0	42.7	9	42.7	31	42.7	10	42.7	5
42.76	0	42.72	0	42.72	7	42.72	27	42.72	4	42.72	8
42.78	0	42.74	1	42.74	3	42.74	23	42.74	1	42.74	9
42.8	0	42.76	2	42.76	0	42.76	20	42.76	0	42.76	9
42.82	0	42.78	2	42.78	0	42.78	18	42.78	0	42.78	8
42.84	0	42.8	0	42.8	0	42.8	16	42.8	0	42.8	5
42.86	0	42.82	0	42.82	0	42.82	14	42.82	0	42.82	3
42.88	0	42.84	0	42.84	0	42.84	13	42.84	0	42.84	2
42.9	1	42.86	0	42.86	0	42.86	11	42.86	0	42.86	2
42.92	3	42.88	0	42.88	0	42.88	10	42.88	1	42.88	3
42.94	5	42.9	0	42.9	0	42.9	8	42.9	3	42.9	4
42.96	7	42.92	3	42.92	0	42.92	6	42.92	3	42.92	5
42.98	11	42.94	5	42.94	0	42.94	4	42.94	2	42.94	6
43	15	42.96	6	42.96	0	42.96	3	42.96	1	42.96	6
43.02	20	42.98	6	42.98	0	42.98	4	42.98	0	42.98	6
43.04	25	43	5	43	0	43	6	43	1	43	5
43.06	30	43.02	6	43.02	2	43.02	10	43.02	4	43.02	4
43.08	35	43.04	9	43.04	4	43.04	14	43.04	9	43.04	3
43.1	40	43.06	15	43.06	6	43.06	18	43.06	14	43.06	2
43.12	45	43.08	25	43.08	11	43.08	24	43.08	20	43.08	2
43.14	49	43.1	37	43.1	20	43.1	29	43.1	25	43.1	3
43.16	52	43.12	50	43.12	32	43.12	35	43.12	31	43.12	4
43.18	53	43.14	60	43.14	44	43.14	40	43.14	35	43.14	6
43.2	52	43.16	66	43.16	54	43.16	44	43.16	37	43.16	7
43.22	50	43.18	69	43.18	60	43.18	46	43.18	38	43.18	7
43.24	48	43.2	68	43.2	61	43.2	45	43.2	37	43.2	6
43.26	46	43.22	64	43.22	59	43.22	42	43.22	36	43.22	6
43.28	45	43.24	59	43.24	58	43.24	37	43.24	35	43.24	7
43.3	44	43.26	53	43.26	55	43.26	32	43.26	33	43.26	9
43.32	42	43.28	46	43.28	50	43.28	27	43.28	31	43.28	11
43.34	38	43.3	38	43.3	43	43.3	22	43.3	28	43.3	12
43.36	32	43.32	31	43.32	33	43.32	18	43.32	25	43.32	11
43.38	27	43.34	25	43.34	24	43.34	14	43.34	22	43.34	9
43.4	22	43.36	20	43.36	16	43.36	12	43.36	21	43.36	7
43.42	18	43.38	16	43.38	10	43.38	11	43.38	20	43.38	6
43.44	16	43.4	13	43.4	5	43.4	10	43.4	19	43.4	5
43.46	14	43.42	10	43.42	2	43.42	10	43.42	18	43.42	4
43.48	14	43.44	6	43.44	0	43.44	10	43.44	18	43.44	3
43.5	13	43.46	3	43.46	0	43.46	8	43.46	18	43.46	2
43.52	13	43.48	0	43.48	0	43.48	6	43.48	18	43.48	0
43.54	14	43.5	0	43.5	1	43.5	4	43.5	17	43.5	0
43.56	15	43.52	0	43.52	2	43.52	1	43.52	14	43.52	0
43.58	16	43.54	0	43.54	4	43.54	0	43.54	9	43.54	1
43.6	17	43.56	0	43.56	6	43.56	0	43.56	4	43.56	3
43.62	16	43.58	0	43.58	8	43.58	0	43.58	1	43.58	4
43.64	15	43.6	3	43.6	10	43.6	1	43.6	0	43.6	5
43.66	13	43.62	6	43.62	11	43.62	3	43.62	2	43.62	6
43.68	11	43.64	8	43.64	12	43.64	5	43.64	5	43.64	7
43.7	8	43.66	9	43.66	11	43.66	8	43.66	7	43.66	8
43.72	7	43.68	10	43.68	8	43.68	11	43.68	8	43.68	11
43.74	6	43.7	10	43.7	5	43.7	14	43.7	9	43.7	13
43.76	8	43.72	11	43.72	3	43.72	18	43.72	9	43.72	16
43.78	11	43.74	11	43.74	3	43.74	21	43.74	11	43.74	19
43.8	16	43.76	12	43.76	3	43.76	25	43.76	14	43.76	21
43.82	23	43.78	13	43.78	5	43.78	29	43.78	19	43.78	22
43.84	29	43.8	16	43.8	8	43.8	32	43.8	24	43.8	21
43.86	35	43.82	21	43.82	12	43.82	33	43.82	27	43.82	20
43.88	40	43.84	26	43.84	17	43.84	32	43.84	27	43.84	18
43.9	42	43.86	31	43.86	20	43.86	30	43.86	25	43.86	17
43.92	43	43.88	36	43.88	23	43.88	27	43.88	21	43.88	15
43.94	41	43.9	39	43.9	23	43.9	24	43.9	19	43.9	14
43.96	37	43.92	41	43.92	23	43.92	22	43.92	17	43.92	14
43.98	32	43.94	42	43.94	21	43.94	20	43.94	15	43.94	13
44	28	43.96	42	43.96	18	43.96	18	43.96	14	43.96	14
44.02	24	43.98	40	43.98	15	43.98	17	43.98	11	43.98	14
44.04	22	44	36	44	11	44	16	44	8	44	14
44.06	21	44.02	31	44.02	9	44.02	17	44.02	6	44.02	13
44.08	19	44.04	26	44.04	8	44.04	21	44.04	3	44.04	11
44.1	18	44.06	21	44.06	8	44.06	25	44.06	2	44.06	9
44.12	15	44.08	16	44.08	9	44.08	30	44.08	0	44.08	6
44.14	12	44.1	12	44.1	10	44.1	35	44.1	0	44.1	3
44.16	9	44.12	9	44.12	10	44.12	37	44.12	0	44.12	0
44.18	6	44.14	8	44.14	9	44.14	37	44.14	0	44.14	0
44.2	3	44.16	8	44.16	8	44.16	35	44.16	0	44.16	0
44.22	1	44.18	8	44.18	6	44.18	30	44.18	0	44.18	0
44.24	0	44.2	10	44.2	4	44.2	26	44.2	0	44.2	0
44.26	0	44.22	12	44.22	2	44.22	22	44.22	0	44.22	0
44.28	0	44.24	13	44.24	0	44.24	21	44.24	0	44.24	1
44.3	2	44.26	15	44.26	0	44.26	21	44.26	0	44.26	3
44.32	3	44.28	16	44.28	0	44.28	22	44.28	0	44.28	4
44.34	3	44.3	17	44.3	0	44.3	23	44.3	1	44.3	4
44.36	2	44.32	17	44.32	0	44.32	23	44.32	3	44.32	2
44.38	0	44.34	16	44.34	0	44.34	22	44.34	3	44.34	0
44.4	0	44.36	15	44.36	0	44.36	20	44.36	3	44.36	0
44.42	0	44.38	13	44.38	0	44.38	17	44.38	1	44.38	0
44.44	0	44.4	12	44.4	0	44.4	14	44.4	0	44.4	0
44.46	2	44.42	9	44.42	3	44.42	10	44.42	0	44.42	0
44.48	5	44.44	7	44.44	8	44.44	6	44.44	0	44.44	3
44.5	7	44.46	3	44.46	11	44.46	4	44.46	0	44.46	4
44.52	8	44.48	1	44.48	13	44.48	4	44.48	0	44.48	3
44.54	8	44.5	0	44.5	12	44.5	6	44.5	0	44.5	0
44.56	7	44.52	0	44.52	10	44.52	9	44.52	0	44.52	0
44.58	6	44.54	0	44.54	8	44.54	12	44.54	1	44.54	0
44.6	6	44.56	1	44.56	6	44.56	15	44.56	1	44.56	0
44.62	5	44.58	3	44.58	4	44.58	16	44.58	0	44.58	0
44.64	5	44.6	5	44.6	3	44.6	15	44.6	0	44.6	0
44.66	4	44.62	6	44.62	1	44.62	12	44.62	0	44.62	0
44.68	4	44.64	7	44.64	0	44.64	9	44.64	0	44.64	0
44.7	3	44.66	7	44.66	0	44.66	5	44.66	0	44.66	0
44.72	2	44.68	6	44.68	0	44.68	3	44.68	2	44.68	0
44.74	1	44.7	6	44.7	0	44.7	1	44.7	3	44.7	0
44.76	0	44.72	6	44.72	0	44.72	0	44.72	4	44.72	0
44.78	1	44.74	6	44.74	0	44.74	0	44.74	5	44.74	0
44.8	1	44.76	7	44.76	0	44.76	0	44.76	5	44.76	0
44.82	3	44.78	7	44.78	0	44.78	0	44.78	5	44.78	0
44.84	4	44.8	7	44.8	0	44.8	0	44.8	6	44.8	0
44.86	4	44.82	7	44.82	1	44.82	0	44.82	8	44.82	0
44.88	5	44.84	7	44.84	5	44.84	2	44.84	10	44.84	3
44.9	5	44.86	8	44.86	8	44.86	4	44.86	11	44.86	5
44.92	6	44.88	10	44.88	11	44.88	7	44.88	12	44.88	6
44.94	8	44.9	13	44.9	12	44.9	11	44.9	12	44.9	6
44.96	10	44.92	15	44.92	11	44.92	14	44.92	12	44.92	6
44.98	11	44.94	16	44.94	10	44.94	17	44.94	12	44.94	6
45	13	44.96	15	44.96	8	44.96	19	44.96	12	44.96	5
45.02	14	44.98	14	44.98	8	44.98	20	44.98	11	44.98	5
45.04	15	45	14	45	9	45	20	45	8	45	4
45.06	16	45.02	16	45.02	10	45.02	19	45.02	4	45.02	4
45.08	17	45.04	18	45.04	11	45.04	17	45.04	1	45.04	5
45.1	19	45.06	20	45.06	10	45.06	15	45.06	0	45.06	5
45.12	21	45.08	21	45.08	10	45.08	14	45.08	0	45.08	6
45.14	23	45.1	21	45.1	9	45.1	12	45.1	1	45.1	7
45.16	23	45.12	21	45.12	9	45.12	12	45.12	3	45.12	9
45.18	23	45.14	20	45.14	10	45.14	11	45.14	4	45.14	11
45.2	22	45.16	19	45.16	11	45.16	12	45.16	5	45.16	13
45.22	23	45.18	18	45.18	14	45.18	13	45.18	7	45.18	15
45.24	24	45.2	17	45.2	18	45.2	17	45.2	10	45.2	16
45.26	24	45.22	17	45.22	22	45.22	21	45.22	15	45.22	18
45.28	25	45.24	17	45.24	25	45.24	26	45.24	21	45.24	21
45.3	25	45.26	17	45.26	28	45.26	30	45.26	28	45.26	25
45.32	26	45.28	17	45.28	30	45.28	33	45.28	33	45.28	30
45.34	29	45.3	19	45.3	30	45.3	35	45.3	37	45.3	34
45.36	34	45.32	21	45.32	29	45.32	35	45.32	38	45.32	35
45.38	37	45.34	24	45.34	26	45.34	36	45.34	37	45.34	35
45.4	39	45.36	28	45.36	24	45.36	36	45.36	33	45.36	32
45.42	39	45.38	31	45.38	22	45.38	36	45.38	29	45.38	28
45.44	36	45.4	33	45.4	21	45.4	36	45.4	24	45.4	25
45.46	32	45.42	33	45.42	23	45.42	36	45.42	19	45.42	22
45.48	27	45.44	31	45.44	25	45.44	36	45.44	16	45.44	20
45.5	23	45.46	28	45.46	26	45.46	36	45.46	14	45.46	18
45.52	18	45.48	25	45.48	25	45.48	34	45.48	14	45.48	15
45.54	15	45.5	21	45.5	21	45.5	31	45.5	16	45.5	13
45.56	13	45.52	17	45.52	16	45.52	28	45.52	19	45.52	11
45.58	12	45.54	13	45.54	10	45.54	24	45.54	19	45.54	9
45.6	12	45.56	11	45.56	5	45.56	20	45.56	16	45.56	8
45.62	13	45.58	9	45.58	2	45.58	17	45.58	11	45.58	7
45.64	12	45.6	10	45.6	2	45.6	15	45.6	4	45.6	5
45.66	11	45.62	11	45.62	2	45.62	15	45.62	0	45.62	3
45.68	8	45.64	14	45.64	4	45.64	16	45.64	0	45.64	2
45.7	6	45.66	17	45.66	6	45.66	18	45.66	0	45.66	2
45.72	4	45.68	18	45.68	8	45.68	20	45.68	0	45.68	2
45.74	4	45.7	17	45.7	8	45.7	20	45.7	0	45.7	2
45.76	4	45.72	14	45.72	8	45.72	17	45.72	0	45.72	1
45.78	5	45.74	10	45.74	5	45.74	14	45.74	2	45.74	0
45.8	6	45.76	7	45.76	1	45.76	10	45.76	4	45.76	0
45.82	5	45.78	5	45.78	0	45.78	7	45.78	6	45.78	0
45.84	4	45.8	4	45.8	0	45.8	6	45.8	8	45.8	0
45.86	2	45.82	4	45.82	0	45.82	7	45.82	10	45.82	0
45.88	1	45.84	4	45.84	0	45.84	8	45.84	11	45.84	0
45.9	0	45.86	5	45.86	0	45.86	8	45.86	11	45.86	0
45.92	0	45.88	6	45.88	0	45.88	7	45.88	10	45.88	0
45.94	0	45.9	7	45.9	3	45.9	7	45.9	8	45.9	1
45.96	0	45.92	7	45.92	5	45.92	7	45.92	6	45.92	1
45.98	1	45.94	8	45.94	6	45.94	8	45.94	4	45.94	2
46	3	45.96	8	45.96	6	45.96	9	45.96	2	45.96	2
46.02	6	45.98	10	45.98	5	45.98	10	45.98	2	45.98	3
46.04	8	46	11	46	4	46	11	46	1	46	5
46.06	10	46.02	12	46.02	2	46.02	10	46.02	1	46.02	7
46.08	10	46.04	14	46.04	0	46.04	8	46.04	1	46.04	8
46.1	10	46.06	15	46.06	0	46.06	7	46.06	1	46.06	9
46.12	10	46.08	15	46.08	0	46.08	5	46.08	0	46.08	8
46.14	10	46.1	15	46.1	0	46.1	4	46.1	0	46.1	6
46.16	10	46.12	15	46.12	1	46.12	4	46.12	0	46.12	3
46.18	8	46.14	16	46.14	4	46.14	4	46.14	0	46.14	1
46.2	4	46.16	17	46.16	6	46.16	5	46.16	0	46.16	0
46.22	0	46.18	18	46.18	7	46.18	6	46.18	0	46.18	0
46.24	0	46.2	19	46.2	7	46.2	6	46.2	0	46.2	0
46.26	0	46.22	20	46.22	7	46.22	7	46.22	0	46.22	0
46.28	0	46.24	19	46.24	7	46.24	7	46.24	1	46.24	1
46.3	0	46.26	18	46.26	7	46.26	7	46.26	1	46.26	2
46.32	0	46.28	14	46.28	8	46.28	6	46.28	2	46.28	3
46.34	1	46.3	10	46.3	8	46.3	4	46.3	1	46.3	3
46.36	5	46.32	4	46.32	7	46.32	2	46.32	0	46.32	2
46.38	8	46.34	0	46.34	7	46.34	0	46.34	0	46.34	0
46.4	11	46.36	0	46.36	5	46.36	0	46.36	0	46.36	0
46.42	13	46.38	0	46.38	2	46.38	0	46.38	0	46.38	0
46.44	12	46.4	0	46.4	0	46.4	0	46.4	0	46.4	0
46.46	9	46.42	1	46.42	0	46.42	3	46.42	1	46.42	0
46.48	6	46.44	4	46.44	0	46.44	7	46.44	3	46.44	3
46.5	2	46.46	6	46.46	0	46.46	10	46.46	4	46.46	6
46.52	0	46.48	7	46.48	0	46.48	12	46.48	6	46.48	8
46.54	0	46.5	8	46.5	0	46.5	13	46.5	6	46.5	10
46.56	3	46.52	10	46.52	0	46.52	11	46.52	7	46.52	11
46.58	6	46.54	11	46.54	0	46.54	9	46.54	7	46.54	12
46.6	10	46.56	13	46.56	0	46.56	7	46.56	8	46.56	13
46.62	11	46.58	14	46.58	0	46.58	4	46.58	9	46.58	14
46.64	10	46.6	16	46.6	0	46.6	3	46.6	10	46.6	15
46.66	8	46.62	19	46.62	0	46.62	2	46.62	10	46.62	15
46.68	6	46.64	21	46.64	0	46.64	3	46.64	9	46.64	15
46.7	4	46.66	22	46.66	0	46.66	5	46.66	7	46.66	16
46.72	4	46.68	21	46.68	0	46.68	9	46.68	5	46.68	17
46.74	4	46.7	19	46.7	0	46.7	14	46.7	3	46.7	18
46.76	4	46.72	17	46.72	0	46.72	17	46.72	4	46.72	19
46.78	3	46.74	16	46.74	1	46.74	20	46.74	5	46.74	18
46.8	2	46.76	16	46.76	4	46.76	22	46.76	7	46.76	16
46.82	1	46.78	16	46.78	6	46.78	23	46.78	8	46.78	13
46.84	0	46.8	16	46.8	7	46.8	23	46.8	7	46.8	9
46.86	0	46.82	17	46.82	9	46.82	23	46.82	7	46.82	7
46.88	0	46.84	17	46.84	9	46.84	21	46.84	9	46.84	6
46.9	2	46.86	18	46.86	9	46.86	20	46.86	12	46.86	6
46.92	5	46.88	19	46.88	10	46.88	18	46.88	17	46.88	6
46.94	8	46.9	20	46.9	13	46.9	18	46.9	23	46.9	7
46.96	12	46.92	22	46.92	18	46.92	18	46.92	29	46.92	8
46.98	14	46.94	23	46.94	24	46.94	18	46.94	34	46.94	10
47	16	46.96	24	46.96	28	46.96	19	46.96	38	46.96	13
47.02	17	46.98	25	46.98	31	46.98	19	46.98	40	46.98	18
47.04	16	47	25	47	31	47	19	47	41	47	24
47.06	13	47.02	25	47.02	29	47.02	18	47.02	40	47.02	29
47.08	10	47.04	24	47.04	26	47.04	18	47.04	40	47.04	31
47.1	7	47.06	23	47.06	25	47.06	18	47.06	39	47.06	29
47.12	6	47.08	21	47.08	25	47.08	18	47.08	38	47.08	25
47.14	6	47.1	19	47.1	25	47.1	18	47.1	37	47.1	21
47.16	8	47.12	15	47.12	24	47.12	18	47.12	35	47.12	18
47.18	10	47.14	11	47.14	22	47.14	16	47.14	32	47.14	17
47.2	13	47.16	7	47.16	20	47.16	15	47.16	27	47.16	15
47.22	15	47.18	3	47.18	18	47.18	13	47.18	22	47.18	14
47.24	17	47.2	0	47.2	16	47.2	13	47.2	18	47.2	11
47.26	19	47.22	0	47.22	14	47.22	13	47.22	15	47.22	10
47.28	18	47.24	0	47.24	13	47.24	13	47.24	15	47.24	11
47.3	17	47.26	2	47.26	13	47.26	12	47.26	15	47.26	14
47.32	15	47.28	4	47.28	13	47.28	11	47.28	17	47.28	18
47.34	13	47.3	7	47.3	13	47.3	11	47.3	18	47.3	22
47.36	13	47.32	11	47.32	13	47.32	12	47.32	19	47.32	25
47.38	15	47.34	14	47.34	14	47.34	13	47.34	19	47.34	25
47.4	18	47.36	17	47.36	15	47.36	14	47.36	19	47.36	23
47.42	22	47.38	18	47.38	16	47.38	15	47.38	19	47.38	20
47.44	25	47.4	18	47.4	17	47.4	15	47.4	20	47.4	17
47.46	27	47.42	17	47.42	17	47.42	16	47.42	21	47.42	16
47.48	27	47.44	17	47.44	17	47.44	16	47.44	24	47.44	16
47.5	26	47.46	18	47.46	16	47.46	17	47.46	26	47.46	16
47.52	24	47.48	20	47.48	15	47.48	18	47.48	29	47.48	17
47.54	22	47.5	23	47.5	15	47.5	19	47.5	31	47.5	17
47.56	21	47.52	26	47.52	16	47.52	20	47.52	33	47.52	17
47.58	21	47.54	28	47.54	18	47.54	21	47.54	35	47.54	16
47.6	21	47.56	29	47.56	21	47.56	23	47.56	37	47.56	15
47.62	21	47.58	29	47.58	24	47.58	25	47.58	38	47.58	14
47.64	19	47.6	27	47.6	27	47.6	28	47.6	37	47.6	13
47.66	17	47.62	25	47.62	28	47.62	29	47.62	35	47.62	12
47.68	15	47.64	23	47.64	27	47.64	29	47.64	30	47.64	13
47.7	13	47.66	21	47.66	25	47.66	28	47.66	25	47.66	14
47.72	12	47.68	19	47.68	22	47.68	27	47.68	22	47.68	15
47.74	13	47.7	17	47.7	20	47.7	25	47.7	21	47.7	14
47.76	14	47.72	17	47.72	18	47.72	22	47.72	23	47.72	13
47.78	15	47.74	16	47.74	17	47.74	18	47.74	26	47.74	12
47.8	16	47.76	15	47.76	15	47.76	14	47.76	28	47.76	10
47.82	16	47.78	14	47.78	12	47.78	11	47.78	28	47.78	9
47.84	15	47.8	12	47.8	9	47.8	9	47.8	26	47.8	8
47.86	14	47.82	10	47.82	7	47.82	9	47.82	21	47.82	6
47.88	13	47.84	7	47.84	5	47.84	10	47.84	15	47.84	5
47.9	10	47.86	5	47.86	4	47.86	12	47.86	10	47.86	4
47.92	7	47.88	4	47.88	4	47.88	13	47.88	6	47.88	4
47.94	5	47.9	4	47.9	6	47.9	14	47.9	3	47.9	4
47.96	5	47.92	5	47.92	7	47.92	13	47.92	3	47.92	4
47.98	7	47.94	5	47.94	9	47.94	12	47.94	4	47.94	3
48	9	47.96	5	47.96	10	47.96	12	47.96	6	47.96	2
48.02	9	47.98	3	47.98	11	47.98	11	47.98	7	47.98	1
48.04	9	48	0	48	10	48	11	48	9	48	1
48.06	7	48.02	0	48.02	10	48.02	10	48.02	12	48.02	2
48.08	4	48.04	0	48.04	9	48.04	10	48.04	15	48.04	4
48.1	2	48.06	0	48.06	8	48.06	10	48.06	17	48.06	6
48.12	0	48.08	0	48.08	7	48.08	8	48.08	18	48.08	7
48.14	0	48.1	3	48.1	7	48.1	5	48.1	16	48.1	7
48.16	0	48.12	7	48.12	7	48.12	2	48.12	12	48.12	7
48.18	0	48.14	9	48.14	8	48.14	0	48.14	8	48.14	7
48.2	1	48.16	10	48.16	9	48.16	0	48.16	4	48.16	9
48.22	1	48.18	10	48.18	10	48.18	0	48.18	2	48.18	10
48.24	1	48.2	8	48.2	10	48.2	1	48.2	3	48.2	11
48.26	2	48.22	6	48.22	10	48.22	3	48.22	4	48.22	11
48.28	3	48.24	4	48.24	9	48.24	2	48.24	6	48.24	9
48.3	7	48.26	2	48.26	7	48.26	1	48.26	8	48.26	5
48.32	11	48.28	0	48.28	4	48.28	0	48.28	10	48.28	1
48.34	15	48.3	0	48.3	3	48.3	1	48.3	10	48.3	0
48.36	17	48.32	0	48.32	2	48.32	3	48.32	10	48.32	0
48.38	16	48.34	0	48.34	2	48.34	6	48.34	9	48.34	0
48.4	14	48.36	0	48.36	2	48.36	7	48.36	10	48.36	0
48.42	11	48.38	0	48.38	3	48.38	8	48.38	11	48.38	0
48.44	10	48.4	3	48.4	5	48.4	8	48.4	14	48.4	0
48.46	11	48.42	6	48.42	7	48.42	7	48.42	16	48.42	0
48.48	13	48.44	9	48.44	10	48.44	8	48.44	18	48.44	0
48.5	15	48.46	11	48.46	13	48.46	9	48.46	19	48.46	2
48.52	17	48.48	13	48.48	15	48.48	10	48.48	18	48.48	4
48.54	17	48.5	15	48.5	16	48.5	11	48.5	16	48.5	5
48.56	18	48.52	15	48.52	16	48.52	12	48.52	13	48.52	5
48.58	18	48.54	16	48.54	16	48.54	12	48.54	10	48.54	4
48.6	19	48.56	16	48.56	17	48.56	12	48.56	9	48.56	4
48.62	20	48.58	15	48.58	18	48.58	11	48.58	10	48.58	4
48.64	22	48.6	15	48.6	19	48.6	12	48.6	12	48.6	6
48.66	25	48.62	16	48.62	21	48.62	14	48.62	16	48.62	8
48.68	28	48.64	18	48.64	23	48.64	17	48.64	20	48.64	10
48.7	30	48.66	21	48.66	24	48.66	20	48.66	23	48.66	13
48.72	32	48.68	24	48.68	26	48.68	22	48.68	26	48.68	16
48.74	31	48.7	25	48.7	26	48.7	25	48.7	28	48.7	21
48.76	30	48.72	25	48.72	27	48.72	28	48.72	30	48.72	25
48.78	27	48.74	25	48.74	26	48.74	29	48.74	31	48.74	29
48.8	25	48.76	25	48.76	26	48.76	30	48.76	31	48.76	31
48.82	24	48.78	26	48.78	24	48.78	29	48.78	29	48.78	30
48.84	23	48.8	25	48.8	22	48.8	29	48.8	27	48.8	28
48.86	22	48.82	25	48.82	18	48.82	29	48.82	24	48.82	26
48.88	22	48.84	25	48.84	14	48.84	30	48.84	20	48.84	23
48.9	23	48.86	26	48.86	11	48.86	29	48.86	16	48.86	20
48.92	24	48.88	27	48.88	9	48.88	27	48.88	13	48.88	18
48.94	24	48.9	28	48.9	9	48.9	23	48.9	12	48.9	16
48.96	23	48.92	29	48.92	10	48.92	17	48.92	11	48.92	14
48.98	22	48.94	28	48.94	11	48.94	12	48.94	11	48.94	11
49	20	48.96	27	48.96	12	48.96	9	48.96	12	48.96	9
49.02	20	48.98	26	48.98	12	48.98	9	48.98	13	48.98	7
49.04	20	49	26	49	10	49	11	49	14	49	5
49.06	22	49.02	26	49.02	8	49.02	15	49.02	17	49.02	4
49.08	25	49.04	26	49.04	7	49.04	18	49.04	19	49.04	3
49.1	27	49.06	26	49.06	7	49.06	19	49.06	22	49.06	2
49.12	29	49.08	24	49.08	7	49.08	18	49.08	23	49.08	1
49.14	29	49.1	22	49.1	8	49.1	13	49.1	21	49.1	0
49.16	28	49.12	20	49.12	8	49.12	9	49.12	18	49.12	0
49.18	27	49.14	19	49.14	8	49.14	5	49.14	15	49.14	0
49.2	25	49.16	17	49.16	8	49.16	4	49.16	14	49.16	0
49.22	25	49.18	16	49.18	9	49.18	6	49.18	13	49.18	0
49.24	25	49.2	16	49.2	9	49.2	9	49.2	14	49.2	0
49.26	25	49.22	16	49.22	11	49.22	13	49.22	15	49.22	0
49.28	24	49.24	16	49.24	13	49.24	16	49.24	16	49.24	0
49.3	23	49.26	17	49.26	15	49.26	17	49.26	17	49.26	1
49.32	22	49.28	18	49.28	16	49.28	17	49.28	19	49.28	2
49.34	21	49.3	18	49.3	16	49.3	16	49.3	23	49.3	4
49.36	21	49.32	20	49.32	16	49.32	15	49.32	27	49.32	7
49.38	21	49.34	21	49.34	14	49.34	14	49.34	30	49.34	12
49.4	23	49.36	22	49.36	11	49.36	13	49.36	32	49.36	18
49.42	25	49.38	23	49.38	9	49.38	12	49.38	32	49.38	23
49.44	28	49.4	23	49.4	8	49.4	11	49.4	31	49.4	26
49.46	30	49.42	22	49.42	7	49.42	10	49.42	31	49.42	27
49.48	31	49.44	21	49.44	8	49.44	10	49.44	31	49.44	26
49.5	30	49.46	21	49.46	10	49.46	10	49.46	30	49.46	25
49.52	30	49.48	21	49.48	13	49.48	12	49.48	29	49.48	23
49.54	29	49.5	22	49.5	17	49.5	15	49.5	28	49.5	22
49.56	28	49.52	23	49.52	22	49.52	17	49.52	28	49.52	21
49.58	27	49.54	24	49.54	25	49.54	17	49.54	27	49.54	19
49.6	25	49.56	24	49.56	26	49.56	16	49.56	27	49.56	17
49.62	23	49.58	22	49.58	26	49.58	14	49.58	25	49.58	15
49.64	21	49.6	19	49.6	23	49.6	12	49.6	23	49.6	13
49.66	20	49.62	15	49.62	20	49.62	11	49.62	20	49.62	13
49.68	22	49.64	12	49.64	17	49.64	10	49.64	20	49.64	13
49.7	25	49.66	9	49.66	16	49.66	10	49.66	22	49.66	15
49.72	27	49.68	9	49.68	17	49.68	11	49.68	25	49.68	16
49.74	28	49.7	10	49.7	18	49.7	12	49.7	29	49.7	18
49.76	28	49.72	12	49.72	20	49.72	15	49.72	32	49.72	20
49.78	27	49.74	15	49.74	22	49.74	19	49.74	33	49.74	22
49.8	28	49.76	17	49.76	24	49.76	21	49.76	32	49.76	24
49.82	30	49.78	20	49.78	26	49.78	23	49.78	30	49.78	27
49.84	34	49.8	24	49.8	28	49.8	22	49.8	29	49.8	31
49.86	38	49.82	28	49.82	30	49.82	22	49.82	29	49.82	34
49.88	42	49.84	32	49.84	32	49.84	23	49.84	30	49.84	37
49.9	46	49.86	35	49.86	33	49.86	26	49.86	32	49.86	39
49.92	52	49.88	37	49.88	35	49.88	31	49.88	37	49.88	41
49.94	59	49.9	41	49.9	39	49.9	38	49.9	43	49.9	43
49.96	66	49.92	45	49.92	45	49.92	46	49.92	51	49.92	46
49.98	70	49.94	52	49.94	54	49.94	55	49.94	61	49.94	50
50	70	49.96	60	49.96	65	49.96	62	49.96	73	49.96	57
[truncated: 1,502 more rows]

## Sheet: Fig. 6 (Magnatic)
Magnetization	x = 0.0	Magnetization	x = 0.2	Magnetization	x = 0.4	Magnetization	x = 0.6	Magnetization	x = 0.8	Magnetization	x = 1.0
2.30101	0.64343	3.01942	0.00425	2.29373	-0.03401	2.78465	-0.01221	3.55607	-0.02126	3.51999	-0.00816
11.6248	0.8614	12.7258	0.03669	11.4962	0.02256	12.2296	0.03389	13.4812	0.03628	13.4049	0.04863
23.3119	1.32159	24.5254	0.15615	22.8237	0.16115	24.222	0.17348	25.6606	0.20412	25.528	0.19762
36.5842	1.6566	38.087	0.33523	36.2427	0.4023	37.6692	0.38001	39.3448	0.46762	39.186	0.411
51.3113	2.02861	52.9487	0.56045	50.9126	0.70145	52.4965	0.65523	53.945	0.78546	53.8053	0.68659
66.8525	2.42326	68.8846	0.81413	66.9112	1.05434	68.2349	0.97821	69.9634	1.16347	69.9532	1.00849
83.4938	2.8528	85.3518	1.08779	83.5586	1.43655	84.8418	1.348	86.7707	1.59444	86.3962	1.36014
100.639	3.29389	102.534	1.3881	100.837	1.84819	102.147	1.75027	103.78	2.0455	103.841	1.74033
118.317	3.75775	119.95	1.7018	118.475	2.28989	119.651	2.17665	121.776	2.53917	121.345	2.13604
136.077	4.23014	138.217	2.03332	136.642	2.74468	137.854	2.62445	139.565	3.03516	139.605	2.55493
154.519	4.72262	156.346	2.37533	155.053	3.22	156.071	3.07875	157.985	3.55978	157.797	2.97417
173.126	5.23086	174.86	2.72444	173.62	3.70337	174.637	3.55287	176.513	4.09154	176.535	3.41098
191.73	5.74609	193.066	3.07203	192.477	4.20285	193.529	4.04405	195.241	4.64353	195.083	3.84758
210.737	6.27006	212.218	3.43275	211.294	4.70394	212.325	4.524	214.262	5.20264	214.14	4.3033
229.642	6.79858	230.967	3.79098	230.335	5.21346	231.165	5.00891	233.208	5.76376	233.158	4.73784
248.558	7.33204	249.964	4.15441	249.515	5.74131	250.34	5.4955	252.493	6.31779	251.909	5.18974
267.596	7.86028	269.464	4.50389	268.806	6.25894	269.27	5.97202	271.602	6.87981	271.19	5.63299
286.757	8.39539	288.474	4.86158	287.621	6.78953	288.372	6.44964	290.598	7.43235	290.434	6.08261
305.975	8.91644	307.62	5.21683	307.034	7.31208	307.838	6.91876	309.787	7.98389	309.665	6.52361
325.247	9.43886	327.038	5.57747	326.243	7.84082	327.058	7.38943	328.956	8.53494	328.771	6.96379
344.696	9.96223	346.491	5.92591	345.558	8.38472	346.192	7.84817	348.083	9.07439	347.965	7.39641
362.426	10.4252	363.616	6.23859	363.234	8.87319	363.854	8.2584	365.98	9.57564	367.24	7.83379
380.653	10.9244	382.545	6.56617	381.683	9.38577	382.43	8.6903	384.282	10.0868	372.597	7.95275
402.273	11.49	403.9	6.92775	403.165	9.96518	403.929	9.17422	405.799	10.6748	382.524	8.17489
421.411	11.9876	423.225	7.27464	422.467	10.4981	423.037	9.5949	425.183	11.1978	403.489	8.64367
440.731	12.4822	442.503	7.5967	441.617	11.0167	442.466	10.0174	444.449	11.7058	424.909	9.11403
458.669	12.9433	458.938	7.90028	458.444	11.5039	458.756	10.3988	460.52	12.1672	445.452	9.54089
497.687	13.7192	493.524	8.34191	490.915	12.1382	491.731	10.8949	496.473	12.8785	486.268	10.2605
553.517	15.0044	548.278	9.17932	545.221	13.45	545.519	11.9122	551.959	14.1484	542.094	11.3461
619.677	16.5243	613.364	10.1681	610.941	15.0549	611.087	13.1064	617.745	15.6547	608.909	12.6456
693.489	18.1367	685.826	11.2609	682.61	16.7677	682.616	14.3646	690.997	17.2723	682.816	14.0347
772.898	19.8056	764.729	12.3946	761.957	18.4915	763.247	15.6893	770.281	18.963	762.72	15.4918
856.876	21.4407	848.644	13.5835	845.708	20.3316	847.03	16.9934	856.061	20.618	847.11	16.9129
945.575	23.0568	936.365	14.6954	934.137	22.1933	934.553	18.1996	943.551	22.2258	935.946	18.3584
1035.78	24.6097	1026.9	15.7881	1023.83	23.9539	1025.46	19.4323	1033.6	23.786	1026.57	19.7319
1129.13	26.1178	1118.8	16.8635	1117.63	25.6712	1117.29	20.5963	1127.28	25.2794	1119.16	21.0433
1223.87	27.5343	1213.86	17.8336	1211.19	27.2179	1212.1	21.6778	1220.38	26.6721	1213.34	22.3093
1319.71	28.87	1310.98	18.8136	1308.54	28.7526	1307.09	22.6382	1317.53	28.0089	1310.56	23.4828
1415.75	30.068	1405.58	19.6396	1403.63	30.0794	1404.74	23.7079	1414.44	29.2319	1405.91	24.6071
1513.89	31.2314	1504.52	20.4792	1502.69	31.5146	1502.76	24.6539	1512.03	30.3479	1504.56	25.6528
1612.76	32.296	1602.7	21.2613	1598.8	32.6972	1600.47	25.447	1610.32	31.3678	1602.31	26.6006
1709.76	33.226	1701.27	21.8797	1699.21	33.8475	1698.98	26.2666	1708.8	32.4037	1702.15	27.5731
1810.51	34.1281	1800.08	22.534	1797.7	34.8867	1797.63	27.1064	1808.99	33.3144	1800.4	28.4299
1888.79	34.8092	1883.35	23.0979	1881.44	35.7069	1885.98	27.7423	1887.13	33.9778	1901.06	29.2472
2009.21	35.6946	1994.97	23.6869	1992.51	36.6949	1988.98	28.3779	2007.77	34.9987	1980.53	29.8091
2109.25	36.4243	2097.66	24.1553	2096.77	37.5159	2097	29.0542	2105.75	35.6204	2099.36	30.7101
2208.26	37.0759	2198.89	24.6281	2197.05	38.3696	2196.15	29.6757	2206.59	36.3361	2199.53	31.3474
2307.84	37.6153	2298.2	25.0156	2295.39	39.1519	2296.07	30.1593	2305.99	37.0698	2298.74	31.9045
2408	38.1467	2399.46	25.367	2396.55	39.8407	2395.89	30.6858	2406.35	37.6796	2399.07	32.492
2508.45	38.6217	2495.99	25.697	2496.1	40.4848	2496.23	31.1798	2506.64	38.1583	2498.11	32.9903
2607.66	39.0499	2596.83	26.0122	2595.93	41.0378	2595.97	31.6624	2606	38.6538	2599.38	33.4647
2708.81	39.4598	2697.16	26.2947	2695.86	41.5574	2696.3	32.0873	2706.16	39.1798	2698.37	33.9032
2807.54	39.852	2796.36	26.3934	2795.65	41.9106	2796.86	32.4783	2806.78	39.5918	2799.98	34.3069
2908.87	40.1659	2898.25	26.7706	2895.72	42.4714	2897.83	32.8607	2906.33	39.9576	2900.3	34.695
3007.77	40.5139	2999.43	26.9475	2996.04	42.8204	2997.33	33.2098	3007.41	40.3975	3000.34	35.0259
3109.91	40.7888	3099.14	27.0651	3097.26	43.3148	3097.91	33.5234	3107.93	40.7924	3100.64	35.3457
3209.69	41.0359	3199.67	27.3437	3196.93	43.6787	3197.62	33.8685	3208.07	41.1152	3200.59	35.5791
3309.79	41.2839	3298.85	27.621	3296.74	43.9385	3297.94	34.1619	3307.36	41.3444	3300.68	35.9355
3410.25	41.5267	3397.24	27.7257	3397.08	44.3432	3397.47	34.4509	3407.85	41.7224	3400.4	36.1907
3509.16	41.7387	3498.11	28.0355	3496.93	44.5297	3496.95	34.7185	3507.16	41.9104	3500.82	36.454
3609.29	41.9508	3599.16	28.1745	3595.97	44.8878	3597.19	34.981	3607.21	42.2481	3600.52	36.6844
3708.88	42.1269	3698.28	28.3496	3696.29	45.2057	3697.55	35.2332	3706.88	42.4638	3700.44	36.9039
3809.02	42.2923	3797.35	28.4955	3796.11	45.4571	3797.24	35.4801	3806.87	42.6182	3800.35	37.1197
3909.49	42.465	3898.59	28.4761	3895.36	45.693	3897.26	35.7036	3907.06	42.9621	3900.29	37.3282
4008.87	42.6152	3996.93	28.604	3996.2	45.9155	3996.89	35.913	4006.98	43.1975	3999.96	37.5105
4095.96	42.7732	4090.1	28.8141	4090.36	46.1142	4093.05	36.0954	4099.26	43.3823	4099.82	37.6902
4200.87	42.8993	4185.58	28.9621	4179.18	46.2538	4181.31	36.2726	4194.48	43.5956	4190.92	37.818
4308.67	43.0463	4299.28	29.0904	4294.28	46.4713	4296.62	36.4918	4306.61	43.7364	4287.01	38.0008
4408.71	43.1825	4399.4	29.1979	4394.91	46.6728	4396.51	36.7221	4407.32	43.9351	4399.65	38.1898
4508.56	43.2939	4499.35	29.3004	4494.22	46.8959	4497.34	36.8903	4506.8	44.1171	4499.12	38.3322
4608.77	43.4073	4600.3	29.1164	4594.54	47.0425	4597.58	37.0795	4606.77	44.2809	4599.79	38.4823
4708.33	43.5156	4699.36	29.2858	4695.72	47.1736	4695.8	37.2177	4705.97	44.44	4699.1	38.5612
4808.56	43.6243	4798.71	29.5559	4794.19	47.2745	4797.31	37.3907	4807.08	44.5543	4799.16	38.6697
4908.52	43.7049	4898.99	29.6516	4894.1	47.3719	4896.69	37.5635	4906.57	44.7267	4899.54	38.8899
5008.61	43.8171	4997.71	29.7386	4995.22	47.6262	4995.71	37.6769	5006.35	44.8774	5000.45	39.0105
5108.54	43.907	5097.23	29.8258	5093.13	47.7882	5096.65	37.7918	5106.65	45.0536	5098.25	39.0475
5207.89	43.982	5196.39	29.9083	5194.71	47.9175	5195.68	37.9566	5206.11	45.1643	5199.48	39.1779
5307.92	44.0666	5296.01	29.9507	5293.47	48.0296	5296.32	38.108	5306.21	45.1897	5298.83	39.3189
5407.66	44.1615	5396.51	30.0255	5393.79	48.1478	5396.8	38.1957	5405.07	45.3822	5399.33	39.4559
5508.07	44.2231	5496.53	30.0667	5494.27	48.263	5495.17	38.3145	5506.06	45.5481	5498.13	39.5484
5606.94	44.3153	5593.69	30.1585	5593.21	48.3767	5596.31	38.4476	5604.26	45.605	5599.42	39.6716
5707.83	44.3733	5694.65	30.2037	5694.04	48.4911	5694.7	38.5533	5705.55	45.7162	5697.66	39.7188
5807.28	44.4535	5795.05	30.0367	5792.94	48.586	5795.9	38.6568	5804.66	45.8324	5799.22	39.9135
5905.64	44.4984	5898.52	30.2715	5893.15	48.6717	5894.5	38.7604	5904.89	45.9913	5898.31	40.0132
6006.82	44.5665	5997.02	30.3503	5993.74	48.6793	5995.56	38.8682	6005.13	46.0475	5997.13	40.1063
6107.68	44.6271	6095.86	30.321	6094.15	48.8468	6095.74	38.9323	6106.17	46.1507	6098.07	40.1515
6208.13	44.703	6199.69	30.3848	6194.11	48.9657	6196.72	38.9961	6205.45	46.2342	6198.66	40.2129
6287.2	44.7239	6278.05	30.4625	6278.46	49.0358	6280.31	39.1	6286.6	46.3289	6298.95	40.285
6408.35	44.8118	6390.01	30.5182	6391.07	49.1184	6393.13	39.2367	6405.69	46.4205	6383.18	40.3527
6508.28	44.8582	6489.77	30.5315	6494.13	49.2078	6496.17	39.3074	6506.85	46.3766	6494.75	40.5408
6607.88	44.9049	6597.5	30.422	6594.65	49.2855	6596.3	39.3633	6606.9	46.5216	6599.41	40.6238
6709.45	44.9677	6695.23	30.6663	6694.4	49.357	6696.1	39.4346	6706.16	46.6007	6699.28	40.7122
6808.03	45.0159	6794.25	30.7203	6794.34	49.4288	6796.34	39.5281	6807.04	46.7096	6800.11	40.7828
6909.08	45.0654	6892.86	30.7584	6894.99	49.4294	6895.92	39.6368	6906.24	46.7956	6898.71	40.8556
7007.96	45.1172	6989.64	30.6827	6994.99	49.501	6996.54	39.7884	7006.41	46.83	6999.25	40.9294
7108.28	45.1563	7092.7	30.7369	7094.45	49.644	7097.22	39.8033	7106.51	46.9345	7098.54	40.969
7207.07	45.1646	7193.99	30.8686	7194.36	49.7071	7196.44	39.8818	7204.86	46.9476	7198.99	41.0652
7308.03	45.2519	7294.16	30.9009	7293.82	49.7714	7295.22	39.9266	7306	47.0591	7298.87	41.1673
7407.51	45.2713	7396.29	30.6688	7393.87	49.7941	7395.6	39.9273	7405.87	47.1068	7397.99	41.1877
7506.84	45.3298	7494.89	30.8187	7493.64	49.8677	7495.33	40.0631	7506	47.1646	7498.47	41.2469
7607.13	45.3673	7596.24	30.8749	7592.45	49.936	7594.5	40.1571	7604.87	47.1868	7598.56	41.3732
7707.04	45.4088	7696.11	30.9788	7693.32	49.8703	7694.96	40.176	7705.48	47.2953	7697.91	41.4017
7807.06	45.4421	7794.52	31.0439	7793.73	50.0519	7795.2	40.2221	7804.21	47.3363	7797.94	41.4715
7906.02	45.4736	7894.55	31.0953	7893.44	50.1057	7895.39	40.3091	7905.04	47.2915	7897.46	41.5424
8006.81	45.526	7994.96	31.1073	7993.3	50.017	7995.06	40.39	8005.1	47.435	7997.73	41.5217
8105.29	45.5482	8094.18	31.1603	8092.41	50.205	8094.3	40.4391	8103.37	47.5373	8097.28	41.6564
8204.88	45.5832	8193.11	31.1941	8192.3	50.2438	8193.51	40.4929	8203.9	47.537	8196.65	41.7123
8305.15	45.6251	8291.53	31.2182	8291.48	50.2909	8293.34	40.5415	8303.14	47.6102	8296.05	41.7224
8404.42	45.6574	8388.71	31.2352	8391.84	50.3597	8393.23	40.594	8402.73	47.6864	8395.64	41.7922
8496.13	45.6943	8482.15	31.2872	8487.08	50.3346	8489.54	40.6589	8490.72	47.7413	8495.37	41.8676
8592.14	45.7169	8578.64	31.2943	8571.05	50.2736	8580.79	40.7018	8593.94	47.685	8590.53	41.924
8704.36	45.7736	8696.46	31.3181	8690.5	50.3301	8691.67	40.747	8702.17	47.7703	8679.21	42.03
8803.31	45.7942	8793.11	31.3386	8791.2	50.4343	8791.91	40.7845	8801.23	47.8267	8794.49	42.0684
8902.92	45.8167	8892.4	31.3571	8890.17	50.5818	8892.28	40.855	8902.01	47.849	8894.54	42.1174
9003	45.8528	9010.92	31.3976	8991.4	50.6115	8991.89	40.8885	9001.04	47.8879	8994.81	42.2027
9104.73	45.8732	9109.38	31.4276	9092.96	50.6693	9092.5	40.93	9102.15	47.8591	9095.02	42.2561
9205.47	45.8995	9206.64	31.4402	9191.77	50.6658	9191.81	40.9933	9202.46	47.9916	9195.76	42.3107
9305.62	45.931	9301.55	31.4563	9293.05	50.6887	9293.37	41.0379	9303.38	48.0432	9296.8	42.3567
9405.09	45.9483	9399.48	31.4781	9392.39	50.7845	9392.54	41.0754	9403.02	48.0927	9396.24	42.3943
9505.77	45.9743	9500.24	31.4908	9493.53	50.8197	9494.1	41.1141	9503.58	48.1484	9496.93	42.4381
9604.94	46.0046	9601.36	31.513	9594.19	50.8163	9594.38	41.1619	9603.52	48.1469	9595.3	42.477
9705.86	46.0295	9702	31.5329	9690.89	50.8111	9688.87	41.1981	9703.95	48.1311	9690.91	42.5422
9798.36	46.0463	9798.43	31.5502	9788.72	50.7308	9793.38	41.2449	9797.9	48.1371	9795.56	42.543
9904.81	46.089	9902.13	31.569	9906.53	50.8967	9916.39	41.2913	9908.29	48.2974	9918.75	42.6222
10029.8	46.1331	10024.6	31.6023	10042.1	50.9086	10057.9	41.338	10037.9	48.3207	10060.1	42.6832
10169.4	46.166	10166.4	31.6228	10191.3	51.0536	10210.4	41.4003	10182.5	48.3748	10211.5	42.7202
10325.4	46.1962	10318.1	31.6576	10352.9	51.1139	10375.5	41.4647	10339.9	48.3584	10376.4	42.8478
10486	46.2396	10481.9	31.6895	10520.3	51.1593	10545.4	41.5146	10503.7	48.4193	10546.7	42.8797
10660.7	46.2805	10656	31.7426	10696.7	51.1983	10724.1	41.5729	10680	48.4837	10726.3	42.9318
10834.7	46.3214	10832.2	31.7527	10879.6	51.2718	10907	41.6544	10859.5	48.5222	10907.8	43.0174
11021.2	46.3446	11013.5	31.7809	11064.9	51.3181	11095	41.695	11043.3	48.6095	11095.8	43.1347
11170.7	46.3567	11160.3	31.8023	11239.5	51.3118	11261	41.7486	11193.5	48.6148	11284.7	43.1876
11396.3	46.4281	11389	31.8345	11423.9	51.3899	11460.2	41.8129	11421	48.725	11445.7	43.2757
11589.8	46.4733	11579.3	31.8639	11641	51.4845	11670	41.8785	11615.7	48.8252	11655.5	43.3428
11781.4	46.5019	11774.1	31.7943	11835.2	51.4259	11864.5	41.938	11809.4	48.8133	11866.1	43.4212
11977.3	46.5403	11967.1	31.7364	12030	51.5758	12062.1	41.9667	12002	48.9148	12061.9	43.4793
12171.9	46.5874	12165.1	31.9191	12227.6	51.5635	12257.5	42.0254	12199.9	48.9115	12259.4	43.4882
12369.7	46.61	12357.9	31.8096	12424.8	51.6285	12456.6	42.1101	12397.7	48.962	12456.4	43.5281
12566.8	46.6195	12556.3	31.9421	12623.4	51.7157	12653.2	42.1536	12595.6	48.9953	12655.4	43.6676
12766.4	46.6813	12754.7	31.9916	12821.4	51.6371	12851.5	42.1742	12794.2	48.9976	12853.7	43.7014
12962.2	46.7095	12951.5	31.9284	13020.4	51.7814	13051.3	42.2163	12993.5	49.0535	13053.3	43.7713
13162.1	46.7083	13150	32.032	13219.1	51.8038	13251.3	42.2531	13191.6	49.1342	13250.9	43.7958
13363.8	46.7715	13344.1	32.0592	13418.3	51.7972	13449.2	42.3348	13388.8	49.2008	13450.2	43.8788
13560	46.7983	13548.6	32.0886	13618.5	51.9193	13648.5	42.371	13589.1	49.2068	13650.4	43.9888
13760	46.8484	13749.2	32.1058	13815.5	51.8387	13847.2	42.4186	13786.4	49.2952	13847.4	44.0655
13956.5	46.8692	13949.3	32.1372	14017.2	51.9064	14045.3	42.4619	13986.9	49.2632	14047.6	44.1174
14156.4	46.8579	14146.7	32.1735	14212.4	51.9665	14244.1	42.516	14186.2	49.2515	14245.4	44.1286
14353.8	46.935	14346.8	32.1911	14414	52.072	14444.4	42.5199	14384.4	49.3685	14443.9	44.2133
14554.1	46.932	14545.4	32.2034	14612.2	52.0859	14643.6	42.581	14583.8	49.308	14642.5	44.2888
14752.6	46.9918	14744.3	32.2195	14811.4	52.1465	14842.1	42.6033	14781.3	49.4802	14840.9	44.3405
14950.6	47.013	14939.8	32.244	15011	52.0934	15040	42.6309	14981	49.4818	15039.9	44.384
15149.1	47.0287	15141	32.2671	15206.6	52.0765	15237.2	42.6796	15179.5	49.5645	15240.6	44.4394
15346.7	47.0164	15337.7	32.2614	15406	52.0699	15436.2	42.7059	15378.9	49.5774	15437.1	44.4861
15520.1	47.0479	15511.9	32.1835	15570.8	52.1573	15623.8	42.754	15551.7	49.5984	15635.4	44.5199
15725.1	47.0707	15717.2	32.2428	15794	52.2882	15801.1	42.8039	15756.3	49.5925	15823.5	44.4841
15937.5	47.0929	15930.8	32.2787	15997.6	52.1947	16030.7	42.8147	15970.3	49.5456	15999.8	44.5957
16128	47.0906	16121.1	32.2947	16156.8	52.273	16226	42.824	16158.4	49.6718	16227.5	44.5969
16137	46.9828	16133.4	32.2036	16110.2	52.1459	16330	42.7678	16165.5	49.4996	16307.8	44.5931
16038.1	46.9862	16036.6	32.1796	15998.7	52.1686	16249.5	42.7115	16065.4	49.4794	16221	44.5764
15907.8	47.0148	15906.9	32.0982	15859.9	52.1488	16128.3	42.7617	15934.9	49.4447	16095.9	44.5804
15756	47.0532	15757.5	32.1635	15704.2	52.1751	15986.1	42.7618	15782.2	49.5218	15950.4	44.5865
15592.4	47.0436	15591.7	32.2623	15534.9	52.2096	15824.2	42.7539	15615.7	49.6235	15788.6	44.5499
15418.9	47.0424	15414.6	32.2547	15357.2	52.218	15654	42.743	15440.3	49.5583	15613.9	44.5467
15235.1	47.0508	15232.1	32.2779	15170.9	52.2157	15471.6	42.7665	15257.1	49.5088	15435.1	44.5211
15047.2	47.0503	15043.9	32.266	14981.7	52.1144	15284.8	42.735	15069.4	49.5367	15248.1	44.4891
14856.3	47.0233	14851.5	32.2458	14787	52.1854	15094.1	42.6952	14876.3	49.5066	15054.9	44.4547
14659.8	47.0053	14656.6	32.2238	14592.5	52.1654	14899.2	42.6154	14681.5	49.524	14862.5	44.3486
14463.5	46.9873	14461.9	32.2122	14392.8	52.142	14700.8	42.6242	14483.3	49.4782	14663.3	44.3281
14263.9	46.9622	14260.9	32.1957	14192.6	52.0646	14504.6	42.657	14285.3	49.4275	14464.3	44.251
14064.9	46.9435	14062.5	32.1669	13993.3	51.8735	14303.3	42.6127	14084.3	49.3415	14265.8	44.2259
13862.3	46.9033	13858.4	32.1487	13791.1	51.9009	14105.3	42.5633	13882.7	49.2943	14063.7	44.0987
13658.4	46.9014	13655.1	32.1306	13591.8	51.9892	13902.4	42.5337	13683.5	49.2313	13864.9	44.1299
13460.5	46.8542	13455.1	32.1216	13388.9	51.9636	13700.9	42.4736	13479.5	49.2923	13662.1	44.0786
13257.9	46.8086	13250.7	32.1046	13188.3	51.917	13499.1	42.4575	13280.2	49.2357	13461.2	44.0282
13058	46.8179	13051.1	32.0756	12985.2	51.8843	13298.7	42.42	13076.4	49.242	13258.4	43.9544
12886.8	46.7825	12887.8	32.0503	12799	51.8412	13120.8	42.3519	12917.5	49.2404	13056.4	43.8215
12662.4	46.7221	12650.1	32.0456	12606.9	51.8094	12911.1	42.3165	12673.6	49.0809	12879.1	43.8126
12451.1	46.7012	12445.6	32.0401	12381.3	51.7635	12695.4	42.2941	12471.5	49.1148	12671.3	43.7629
12249.4	46.6708	12250.6	31.9977	12180.1	51.7281	12492.2	42.2176	12272.2	48.9126	12452.5	43.6118
12048.3	46.6266	12047.8	31.9679	11980.7	51.6128	12289.4	42.1921	12072.1	49.0343	12251.3	43.6079
11845.6	46.6152	11847.1	31.9446	11777.1	51.5746	12088.4	42.1632	11868.9	48.966	12050.4	43.5044
11646.1	46.5737	11644.9	31.9139	11575.1	51.5244	11887.3	42.0742	11667.9	48.7976	11848.6	43.4912
11445.4	46.5165	11439.7	31.8953	11376.5	51.5451	11685.6	42.0424	11469	48.9074	11647.6	43.4237
11244.1	46.4852	11238.4	31.8806	11174	51.4981	11486.7	41.9881	11265.3	48.7204	11447.8	43.4046
11042.8	46.4579	11037.5	31.8589	10973.3	51.3256	11284.5	41.9368	11066.8	48.6706	11246.1	43.3485
10842.6	46.4099	10838.4	31.8323	10772.7	51.3971	11084.6	41.8826	10863.7	48.6652	11046.8	43.2599
10641.8	46.3788	10638.5	31.7898	10571.8	51.3251	10882	41.8957	10664.8	48.5592	10845	43.1375
10458.1	46.3434	10457.8	31.7498	10410.6	51.1782	10682.3	41.817	10472	48.6579	10641.5	43.0481
10348.2	46.2813	10348	31.7278	10315.2	51.2199	10487.4	41.7326	10355.6	48.5759	10457.1	42.9851
10267.2	46.2521	10266.8	31.6141	10240.5	51.0776	10364.7	41.6509	10272.3	48.4475	10344.7	42.9293
10205.1	46.218	10205.3	31.6262	10183.9	51.1005	10278.2	41.586	10207.5	48.4079	10264.4	42.846
10155.8	46.2121	10152.7	31.6068	10136.4	51.0351	10212.3	41.5568	10156.9	48.4037	10201.7	42.8655
10106.2	46.19	10105.1	31.4761	10083.2	51.1208	10161.6	41.5371	10104.3	48.3333	10151.9	42.8635
10048	46.1947	10045.4	31.6376	10020.5	50.9879	10107.6	41.5251	10044.2	48.4515	10098.2	42.8591
9982.14	46.1898	9979.44	31.6367	9951.51	51.1077	10045.6	41.5111	9975.8	48.4619	10034.4	42.729
9908.99	46.1801	9905.06	31.6134	9874.57	51.1018	9975.59	41.4893	9900.76	48.2688	9963.21	42.7774
9829.07	46.165	9826.48	31.6121	9791.84	50.9751	9898.62	41.5073	9819.46	48.3497	9886.65	42.6925
9747.59	46.147	9751.9	31.622	9719.76	50.8242	9830.33	41.4603	9744.98	48.3452	9803.56	42.6744
9670.63	46.133	9666.5	31.5981	9619.55	50.9566	9733.85	41.4122	9655.92	48.3355	9731.52	42.6411
9565.79	46.0961	9563.54	31.5878	9523.77	50.9039	9641.52	41.3773	9554.26	48.3203	9630.46	42.6674
9472.31	46.0867	9470.27	31.5532	9429.41	50.9809	9548.43	41.3545	9459.39	48.2401	9535.62	42.6264
9377.34	46.0627	9377.14	31.5565	9334.38	50.8967	9454.48	41.3343	9364.69	48.222	9440.45	42.5068
9282.78	46.0375	9280.31	31.547	9237.13	50.8202	9358.93	41.2597	9268.46	48.2054	9345.99	42.4982
9184.49	46.0173	9183.41	31.5145	9140.59	50.8366	9263.21	41.2442	9171.41	48.2056	9248.63	42.4847
9086.5	45.9802	9084.25	31.5118	9042.46	50.8219	9165.34	41.1995	9072.46	48.0854	9151	42.3509
8989.09	45.9573	8986.19	31.4944	8944.85	50.6968	9067.48	41.1906	8975.3	48.1095	9052.78	42.3282
8890.58	45.9373	8888.16	31.4744	8845.58	50.6314	8969.8	41.1585	8876.46	48.1143	8954.76	42.2727
8793.23	45.9042	8791.24	31.4491	8746.56	50.7198	8870.98	41.1008	8777.84	48.0528	8856.2	42.2127
8693.64	45.8819	8692.27	31.436	8648.22	50.6891	8772.13	41.0865	8679.76	47.9853	8758.45	42.1534
8595.74	45.8591	8592.68	31.3987	8548.58	50.6428	8673.56	41.0598	8580.01	47.8521	8659.17	42.1679
8495.42	45.8217	8493.13	31.3715	8449.64	50.6048	8574.29	41.004	8481.13	47.9473	8560.06	42.1362
8395.88	45.7775	8393.48	31.3583	8349.92	50.5614	8475.12	40.9671	8381.25	47.9182	8460.01	42.1016
8296.38	45.7406	8293.45	31.3334	8250.43	50.3896	8375.37	40.9108	8282.47	47.741	8360.54	41.9378
8196.7	45.7252	8193.59	31.3016	8150.55	50.2804	8275.95	40.8853	8182.4	47.7445	8261.16	41.9284
8097.29	45.6878	8093.09	31.2855	8050.46	50.301	8176.24	40.8285	8082	47.6625	8161.68	41.8972
7997.12	45.6397	7993.65	31.2698	7950.1	50.3791	8075.54	40.7881	7981.58	47.7163	8061.39	41.7759
7895.91	45.6162	7894.87	31.2469	7850.7	50.2635	7975.38	40.7398	7881.71	47.6401	7961.05	41.7552
7796.87	45.5891	7791.49	31.2244	7749.22	50.155	7875.19	40.711	7781.35	47.4899	7861.48	41.7113
7695.43	45.556	7692.88	31.1859	7649.24	50.1662	7775.86	40.6168	7681.38	47.5033	7761.36	41.6058
7612.54	45.5088	7613.24	31.0382	7557.31	49.9413	7683.4	40.5811	7585.42	47.526	7661.2	41.5943
7503.5	45.4696	7492.94	31.1139	7461.77	50.1131	7587.12	40.5352	7496.42	47.4718	7567.39	41.4777
7395.8	45.417	7392.53	31.1038	7349.36	49.9966	7475.28	40.4806	7381.2	47.4152	7471.48	41.4412
7295.51	45.3725	7292.68	31.0528	7249.17	49.8342	7374.85	40.4275	7281.08	47.362	7359.97	41.4668
7195.15	45.3576	7192.86	31.042	7148.88	49.8957	7275.02	40.3742	7179.78	47.3031	7259.64	41.3491
7095.23	45.3015	7090.95	31.0257	7048.98	49.8205	7174.75	40.3252	7080.94	47.2483	7160.15	41.2366
6995.15	45.2486	6993.63	30.9878	6948.49	49.8279	7074.63	40.2483	6979.98	47.1133	7059.79	41.2071
6894.98	45.2257	6893.29	30.9599	6847.45	49.6322	6973.89	40.1997	6880.32	47.0597	6960.06	41.175
6794.16	45.1661	6787.02	30.9302	6748.56	49.5926	6873.79	40.155	6779.52	47.0157	6859.41	41.0634
6694.52	45.1276	6689.14	30.8939	6647.11	49.6547	6774.09	40.067	6680.18	46.9868	6759.31	40.9704
6594.94	45.0698	6591.07	30.856	6548.18	49.5942	6672.63	40.0134	6579.89	46.8418	6658.84	40.9086
6494.12	45.0212	6487.71	30.8218	6447.15	49.5272	6573.95	39.9586	6479.82	46.6965	6558.44	40.8753
6394.59	44.986	6386.69	30.7837	6347.4	49.3292	6472.44	39.8731	6378.7	46.5544	6457.82	40.7731
6293.82	44.9316	6287.88	30.7461	6247.94	49.3518	6373.59	39.8082	6279.64	46.5893	6358.02	40.7116
6193.88	44.8659	6187.39	30.6935	6146.8	49.3166	6272.37	39.7303	6178.68	46.6058	6258.2	40.6139
6094.1	44.8054	6089.83	30.6742	6046.79	49.2225	6173.71	39.6619	6077.94	46.5368	6159.24	40.5821
5993.48	44.7531	5988.49	30.5144	5947.52	49.0399	6072.35	39.5906	5979.16	46.4581	6057.85	40.4753
5893.78	44.6697	5890.76	30.4591	5846.91	48.9327	5972.33	39.4796	5878.82	46.3762	5957.6	40.4395
5794.31	44.6304	5792.45	30.3011	5748.6	48.8613	5873.26	39.4356	5779.99	46.2854	5858.63	40.3587
5694.43	44.5697	5694.49	30.3815	5648.04	48.8686	5772.49	39.3496	5679.72	46.1985	5758.97	40.2608
5594.82	44.4826	5594.3	30.3123	5548.85	48.7575	5674.63	39.2483	5579.58	46.0971	5658.24	40.1796
5494.88	44.4199	5493.09	30.3331	5448.19	48.5662	5573.59	39.174	5480.12	45.9927	5559.97	40.0918
5399.32	44.3392	5409.64	30.3334	5364.44	48.5926	5490.67	39.109	5392.08	45.8985	5459.1	39.9675
5310.82	44.2735	5305.4	30.2805	5251.99	48.4359	5377.77	38.9682	5288.16	45.8065	5374.9	39.9129
5195.25	44.1877	5194.23	30.2362	5149	48.2643	5273.6	38.8713	5179.77	45.6942	5263.27	39.7591
5096.09	44.0925	5093.69	30.1669	5048.56	48.2428	5174.08	38.7804	5080.34	45.4697	5159.91	39.6051
4995.35	44.0143	4993.59	30.1102	4948.75	48.1472	5073.69	38.6425	4980.78	45.4072	5059.04	39.4777
4894.11	43.9244	4892.54	30.0368	4848.07	47.9928	4974.33	38.5229	4879.91	45.3544	4959.52	39.4027
4795.26	43.8294	4790.81	29.9739	4748.88	47.722	4873.18	38.4474	4780.08	45.2219	4858.87	39.2973
4693.49	43.7305	4690.67	29.8938	4648.09	47.6601	4773.6	38.311	4679.9	45.0815	4759.67	39.1927
4595.13	43.6349	4590.99	29.8212	4547.51	47.6162	4674.47	38.223	4579.7	44.9186	4658.59	39.1221
4493.58	43.5323	4490.19	29.7486	4447.56	47.4438	4574	38.0942	4479.43	44.8039	4559.12	38.9876
4395.18	43.4173	4390.31	29.6773	4347.61	47.2266	4473.62	37.9397	4378.67	44.6584	4458.44	38.8725
4294.12	43.2942	4290.51	29.5896	4247.89	47.1506	4373.03	37.789	4278.77	44.492	4358.76	38.7247
4194.73	43.1632	4191.69	29.4876	4147.94	46.88	4273.66	37.6182	4179.88	44.3403	4258.58	38.5518
4094.08	43.0417	4092.03	29.3974	4048.3	46.7906	4173.35	37.4779	4079.6	44.0842	4159.19	38.3812
3994.68	42.9085	3991.65	29.2985	3948.55	46.6012	4074.09	37.318	3979.75	43.8568	4058.65	38.1961
3893.9	42.76	3891.14	29.2013	3847.65	46.3845	3973.32	37.1712	3879.62	43.7	3959.5	38.0674
3794.27	42.5976	3790.14	29.0851	3748.09	46.1557	3873.97	36.9902	3779.64	43.4781	3859.33	37.9106
3694.67	42.4269	3690.95	28.9642	3647.67	45.8401	3773.33	36.8127	3679.43	43.3466	3759.23	37.7451
3593.9	42.2511	3590.57	28.8541	3547.63	45.593	3673.07	36.6003	3579.51	43.1719	3658.92	37.5671
3493.82	42.0716	3491	28.7277	3447.76	45.3547	3573.31	36.3915	3480.08	42.9499	3558.88	37.3408
3393.94	41.8877	3391.47	28.5593	3347.56	45.2002	3465.82	36.15	3379.35	42.556	3458.09	37.1839
3294.05	41.6504	3290.91	28.414	3246.72	44.8422	3413.47	36.033	3278.13	42.386	3357.85	36.9614
3209.92	41.4569	3210.1	28.2937	3152.06	44.5942	3353.4	35.9085	3199.03	42.2166	3257.78	36.7794
3101.33	41.1908	3089.97	28.0913	3062.27	44.2467	3264.69	35.688	3077.89	41.876	3165.94	36.5408
2993.6	40.912	2988.75	27.9406	2947.15	43.9035	3160.44	35.426	2979.63	41.6044	3069.65	36.2713
2892.83	40.6215	2890.32	27.7457	2846.39	43.3876	3052.93	35.1608	2878.51	41.2469	2958.33	36.0047
2793.54	40.3173	2789.13	27.5295	2745.96	42.9778	2952.08	34.8468	2778.38	40.8924	2857.66	35.6534
2693.05	39.9744	2690.72	27.3186	2646.99	42.5587	2853.19	34.5568	2679.43	40.4367	2758.1	35.3096
2594.31	39.6075	2590.54	27.0732	2546.47	42.0865	2752.07	34.2832	2578.79	40.1328	2657.86	34.9762
2493.69	39.1982	2490.76	26.8467	2447.52	41.5229	2651.89	33.8738	2478.54	39.6671	2558.08	34.6733
2393.71	38.7643	2390.71	26.5568	2347	41.0933	2552.06	33.5049	2379.36	39.136	2457.52	34.1923
2293.72	38.2671	2290.84	26.25	2248.09	40.5237	2453.48	33.1323	2278.52	38.7042	2358.63	33.8009
2193.75	37.7275	2190.08	25.9068	2147.33	39.8473	2352.57	32.6698	2179.89	38.174	2258.36	33.2728
2094.48	37.1261	2091.61	25.535	2048.47	39.1283	2252.84	32.2048	2079.08	37.5413	2159.23	32.7476
1994.25	36.495	1991.21	25.1486	1947.5	38.2122	2153.46	31.7125	1979.99	36.8565	2058.27	32.2142
1894.64	35.7671	1890.86	24.7217	1848.46	37.4035	2052.91	31.1789	1879.85	36.1476	1959.6	31.5904
1794.68	35.0043	1791.08	24.1928	1747.69	36.4401	1953.57	30.6334	1779.77	35.4763	1858.53	30.8843
1694.56	34.1577	1690.88	23.649	1647.72	35.4732	1853.91	30.023	1678.5	34.6537	1757.78	30.2001
1594.15	33.2368	1591.32	23.0257	1548.28	34.4395	1753.07	29.3596	1579.41	33.7866	1659.24	29.4417
1494.73	32.2224	1491.68	22.348	1447.56	33.2962	1653.54	28.6375	1479.15	32.8183	1558.51	28.5634
1394.54	31.1372	1391.05	21.5769	1348.62	31.9545	1553.16	27.8703	1379.88	31.798	1459.43	27.6633
1294.56	29.9186	1291.41	20.767	1247.49	30.644	1453.2	27.052	1280	30.6309	1358.34	26.6709
1194.89	28.6055	1191.95	19.829	1148.7	29.1737	1353.35	26.1511	1180.24	29.3389	1260.01	25.6299
1095.32	27.1722	1091.73	18.8322	1047.9	27.4685	1253.72	25.1918	1080.25	28.0118	1159.07	24.4509
999.378	25.6911	1004.57	17.9014	964.671	25.9636	1153.38	24.1567	987.982	26.6352	1060.14	23.2441
910.308	24.1844	899.903	16.6515	852.412	23.8505	1061.8	23.1482	892.174	25.0521	974.962	22.0643
794.952	22.1256	792.018	15.2736	747.23	21.6933	970.37	22.0134	779.417	23.0393	862.951	20.4056
694.05	20.0878	691.692	13.8964	648.238	19.5088	853.756	20.5033	679.23	21.0368	759.43	18.7537
635.108	18.4427	592.189	12.4013	558.972	17.2067	755.237	19.0592	580.991	18.8762	674.216	17.1077
621.841	17.9982	551.579	11.3923	536.009	16.1901	706.293	17.9938	541.388	17.4519	655.361	16.473
610.069	17.7251	539.933	11.1501	525.092	15.9519	694.542	17.8076	529.352	17.0963	644.244	16.2532
597.387	17.4331	529.014	10.994	513.754	15.6868	683.502	17.5942	518.156	16.8248	632.64	16.0405
583.943	17.1264	516.641	10.7998	501.176	15.3436	671.365	17.3791	505.759	16.5239	619.988	15.8057
569.239	16.7958	503.469	10.5643	487.652	15.0129	658.337	17.1473	492.177	16.1877	606.061	15.5415
553.606	16.4277	489.097	10.366	472.749	14.6476	643.888	16.8927	477.753	15.8329	591.224	15.2598
537.326	16.0502	474.223	10.0717	457.158	14.2201	628.397	16.6513	462.014	15.4439	575.348	14.9588
520.137	15.6385	458.002	9.8282	440.55	13.7862	612.269	16.3679	445.824	15.0256	558.655	14.6301
502.676	15.2288	440.922	9.56452	423.369	13.3365	595.166	16.0687	428.635	14.5743	541.128	14.2842
484.497	14.7798	423.477	9.27657	405.764	12.8842	577.591	15.7729	411.154	14.1116	523.205	13.9195
466.167	14.3308	405.481	8.96998	387.531	12.398	559.694	15.4483	392.946	13.6146	504.902	13.5474
447.221	13.8659	386.864	8.62686	369.025	11.8877	541.138	15.0795	374.388	13.1002	486.422	13.1596
428.511	13.3911	368.527	8.32285	350.138	11.3673	522.46	14.7304	355.703	12.573	467.494	12.7607
409.06	12.8922	349.48	7.99143	331.097	10.8339	503.273	14.3525	336.703	12.0331	448.253	12.3586
389.864	12.403	330.599	7.65121	311.587	10.264	484.11	13.9823	317.264	11.4636	429.042	11.9485
370.428	11.8903	311.023	7.27452	292.203	9.71767	464.591	13.5962	298.261	10.8903	409.478	11.5125
350.662	11.3601	291.502	6.91775	272.757	9.16883	445.233	13.1964	278.382	10.3083	390.039	11.0828
333.356	10.8953	275.192	6.62103	253.767	8.61869	425.457	12.781	261.931	9.81045	370.392	10.6387
312.864	10.33	252.805	6.19021	236.7	8.10939	409.039	12.4336	240.127	9.13386	351.473	10.1974
292.385	9.74207	234.482	5.80621	213.734	7.4383	388.612	11.964	221.43	8.51745	334.118	9.79799
280.519	9.35859	223.348	5.55887	198.804	6.93278	376.646	11.6563	210.391	8.11561	316.098	9.32041
269.023	9.04356	211.53	5.33204	187.949	6.60479	364.768	11.3973	198.561	7.762	305.293	9.06399
255.599	8.68052	198.253	5.07006	175.38	6.24181	351.198	11.0938	185.282	7.34104	292.64	8.76468
241.22	8.2659	183.637	4.78031	161.567	5.84994	336.38	10.7597	170.492	6.86979	279.033	8.44467
225.53	7.82302	167.786	4.44506	146.234	5.39856	320.697	10.3964	154.669	6.37019	263.4	8.08015
209.157	7.33907	151.168	4.09704	130.301	4.93336	303.667	9.99667	138.099	5.81793	247.237	7.69157
191.945	6.84295	133.841	3.72928	112.983	4.42809	286.175	9.57849	120.671	5.2529	230.479	7.26518
174.073	6.30731	116.104	3.35089	95.3767	3.9166	268.478	9.14742	102.799	4.6501	212.489	6.818
155.861	5.7662	97.678	2.93103	77.019	3.37628	249.986	8.67317	84.2913	4.04349	194.654	6.36195
137.363	5.21147	79.3021	2.52482	61.5192	2.85279	231.435	8.19431	65.6664	3.4186	178.093	5.90413
125.421	4.77885	67.2148	2.19552	50.8169	2.49506	219.154	7.82152	52.8312	2.91186	167.402	5.6006
114.617	4.467	55.9745	1.93889	38.744	2.12981	207.822	7.52414	41.6291	2.53061	155.47	5.29555
102.191	4.09854	43.0355	1.65275	25.2588	1.72865	194.866	7.18836	28.9154	2.09521	141.925	4.94844
88.4243	3.69428	29.2208	1.33168	10.3631	1.1338	180.452	6.81224	14.8756	1.57524	127.184	4.56934
73.1127	3.23173	13.7063	0.91634	-5.78717	1.03831	165.194	6.39879	-0.60331	0.99801	111.374	4.15018
56.9691	2.73589	-2.61291	0.49599	-22.5919	0.87736	148.715	5.9506	-17.0857	1.07416	94.6238	3.70472
39.8872	2.19306	-19.8449	0.59132	-40.2711	0.44648	131.491	5.46667	-34.2509	0.69345	76.9745	3.2304
22.5163	1.65676	-37.7464	0.40993	-58.5445	-0.06466	113.694	4.97143	-52.1608	0.18669	59.0451	2.72963
4.00807	0.94446	-55.2968	0.10857	-77.3544	-0.61361	95.2633	4.43736	-69.896	-0.3542	40.5703	2.20214
-10.7637	0.86589	-70.8404	-0.17707	-93.8326	-1.10223	77.2963	3.90711	-85.2699	-0.85733	21.4816	1.67611
-33.8777	0.70575	-93.6809	-0.64708	-113.67	-1.70299	60.3991	3.3787	-108.163	-1.61481	4.72592	1.06484
-53.2389	0.30293	-112.938	-1.05896	-134.642	-2.32616	38.081	2.68333	-127.533	-2.26641	-15.599	0.96047
-72.525	-0.17267	-132.47	-1.46955	-154.107	-2.90708	18.5985	2.00221	-147.094	-2.93297	-36.7879	0.6757
-92.1904	-0.6963	-151.892	-1.87646	-173.713	-3.48642	-1.10686	1.1658	-166.406	-3.58548	-56.5616	0.22395
-111.783	-1.23157	-171.869	-2.30005	-193.614	-4.08004	-20.887	1.28025	-186.331	-4.27542	-76.4262	-0.26877
-131.638	-1.79586	-191.457	-2.71998	-213.556	-4.68189	-41.0256	0.91181	-205.875	-4.94164	-96.223	-0.77587
-151.273	-2.3584	-211.138	-3.15036	-233.492	-5.27328	-60.6741	0.42761	-225.93	-5.62604	-115.921	-1.29528
-171.325	-2.94793	-231.507	-3.58591	-253.439	-5.87491	-80.7762	-0.11457	-245.873	-6.3074	-135.948	-1.82431
-191.058	-3.52866	-251.322	-4.00824	-273.254	-6.47945	-100.496	-0.67422	-265.557	-6.96511	-155.851	-2.35917
-213.631	-4.14659	-277.598	-4.47486	-293.583	-7.06831	-129.934	-1.4127	-290.873	-7.70602	-177.624	-2.90733
-256.242	-5.22813	-325.794	-5.35101	-332.103	-8.03491	-179.818	-2.73894	-338.798	-9.06003	-219.829	-3.8383
-313.967	-6.83575	-385.589	-6.47092	-387.665	-9.58209	-242.536	-4.51827	-398.468	-10.8227	-276.472	-5.22636
-381.222	-8.73561	-455.541	-7.76221	-453.993	-11.4144	-313.818	-6.48982	-468.107	-12.8236	-344.298	-6.89328
-456.083	-10.7866	-531.39	-9.10735	-527.902	-13.4225	-392.04	-8.56833	-545.599	-14.9019	-419.017	-8.66082
-537.169	-12.9299	-614.545	-10.5567	-608.323	-15.568	-476.393	-10.6639	-628.191	-16.9979	-500.442	-10.5149
-622.631	-15.1047	-700.66	-11.9601	-694.673	-17.7537	-563.208	-12.5892	-715.232	-19.096	-586.226	-12.3888
-712.685	-17.2644	-791.391	-13.3519	-783.9	-19.8542	-654.15	-14.4907	-805.608	-21.0648	-675.692	-14.2591
-804.062	-19.2983	-883.48	-14.7119	-875.423	-21.8885	-746.663	-16.258	-898.129	-22.9474	-767.504	-16.0177
-898.73	-21.254	-978.116	-15.9838	-969.257	-23.8799	-841.867	-17.9057	-992.669	-24.6778	-861.361	-17.7244
-994.078	-23.0719	-1074.49	-17.1745	-1064.18	-25.7649	-937.543	-19.4046	-1087.48	-26.2718	-956.076	-19.3213
-1090.05	-24.7931	-1170.39	-18.2703	-1161.03	-27.4569	-1035.45	-20.8372	-1184.84	-27.784	-1053.49	-20.8357
-1179.85	-26.2869	-1259.69	-19.2179	-1253.06	-29.0372	-1132.62	-22.1248	-1270.46	-29.0212	-1151.96	-22.252
-1273.43	-27.7225	-1353.56	-20.1317	-1341.01	-30.3786	-1218.96	-23.1455	-1373.03	-30.3313	-1229.09	-23.3272
-1383.2	-29.2588	-1463.45	-21.093	-1455.01	-31.9393	-1321.11	-24.3368	-1478.4	-31.5953	-1347.89	-24.7736
-1481.82	-30.4956	-1562.84	-21.8788	-1552.59	-33.2608	-1427.95	-25.4561	-1578.04	-32.6585	-1445.74	-25.8561
-1580.95	-31.6536	-1662.05	-22.6037	-1652.7	-34.3777	-1527	-26.4079	-1676.94	-33.6275	-1544.99	-26.8983
-1680.05	-32.7012	-1761.35	-23.2561	-1751.13	-35.4641	-1626.35	-27.2906	-1776.49	-34.5309	-1643.84	-27.8427
-1779.57	-33.6718	-1860.97	-23.8632	-1851.48	-36.496	-1726.45	-28.1303	-1875.97	-35.3456	-1743.48	-28.7627
-1878.44	-34.5592	-1960.52	-24.3656	-1949.75	-37.2996	-1826.16	-28.8978	-1975.68	-36.1261	-1842.71	-29.6119
-1978.94	-35.3726	-2060.92	-24.8263	-2050.68	-38.1975	-1925.71	-29.5975	-2075.13	-36.8138	-1942.66	-30.3984
-2078.77	-36.1144	-2160.06	-25.2586	-2148.78	-39.0218	-2025.71	-30.2316	-2174.78	-37.4488	-2043.39	-31.0842
-2178.15	-36.788	-2258.62	-25.6457	-2249.33	-39.7612	-2125.64	-30.8376	-2273.88	-37.9894	-2142.44	-31.7261
-2279.46	-37.401	-2359.35	-25.9741	-2349.97	-40.5165	-2225.23	-31.3559	-2374.8	-38.6203	-2242.94	-32.3432
-2377.98	-37.9609	-2459.74	-26.2147	-2449.4	-41.0476	-2324.75	-31.7596	-2475.28	-39.1679	-2341.91	-32.9087
-2479.04	-38.4828	-2559.88	-26.6327	-2548.91	-41.6184	-2424.66	-32.2846	-2574.54	-39.6488	-2442.8	-33.4711
-2577.83	-38.9292	-2659.83	-26.8928	-2649.83	-42.1255	-2524.83	-32.7499	-2675.04	-40.0864	-2542.56	-33.9421
-2678.98	-39.3619	-2758.74	-27.1363	-2749.01	-42.6089	-2625.39	-33.1411	-2774.51	-40.4904	-2642.6	-34.3359
-2777.66	-39.7383	-2859.51	-27.3733	-2849.76	-43.1202	-2724.03	-33.5572	-2875.14	-40.8823	-2742.64	-34.7221
-2879.03	-40.09	-2961.85	-27.5707	-2949.4	-43.4632	-2824.95	-33.9103	-2974.04	-41.2042	-2842.66	-35.0634
-2977.59	-40.4159	-3060.82	-27.7783	-3049.55	-43.8509	-2925.81	-34.2476	-3075.33	-41.4264	-2943.07	-35.4041
-3078.86	-40.7059	-3159.88	-27.9639	-3150.35	-44.0821	-3025.65	-34.5699	-3174.53	-41.7972	-3042.86	-35.7302
-3179.79	-40.9952	-3264.99	-28.1639	-3250.37	-44.418	-3126.42	-34.9392	-3275.31	-42.1289	-3142.88	-35.991
-3278.65	-41.2568	-3371.75	-28.3419	-3350.43	-44.8348	-3224.93	-35.2131	-3375.23	-42.3858	-3242.53	-36.2418
-3363.31	-41.4619	-3440.69	-28.4293	-3438.02	-44.9265	-3325.66	-35.4804	-3455.36	-42.6232	-3342.72	-36.5068
-3474.25	-41.7071	-3559.49	-28.6199	-3542.24	-45.3238	-3405.3	-35.7099	-3575.66	-42.9255	-3434.71	-36.7681
-3579	-41.9101	-3659.71	-28.7519	-3649.11	-45.5717	-3524.38	-36.0067	-3674.45	-43.0833	-3530.44	-36.9863
-3678.31	-42.1073	-3759.53	-28.8692	-3749.22	-45.8372	-3625.2	-36.1875	-3774.58	-43.3284	-3642.71	-37.2179
-3778.47	-42.2888	-3860.27	-28.9909	-3848.74	-46.1146	-3725.67	-36.3382	-3874.38	-43.5666	-3743.2	-37.3858
-3878.25	-42.4645	-3958.92	-29.1031	-3948.89	-46.2656	-3824.73	-36.5559	-3974.8	-43.7559	-3842.66	-37.5503
-3978.75	-42.6368	-4059.8	-29.2229	-4048.92	-46.5753	-3926.1	-36.8163	-4074.12	-43.9531	-3942.6	-37.759
-4079.1	-42.7776	-4159.2	-29.3306	-4149.5	-46.7618	-4024.74	-37.0115	-4175.37	-44.1177	-4042.24	-37.9105
-4178.62	-42.9243	-4259.66	-29.2587	-4249.46	-46.9545	-4125.21	-37.1845	-4273.87	-44.2774	-4142.23	-38.0952
-4278.98	-43.0664	-4359.83	-29.2649	-4349.86	-47.1289	-4224.93	-37.3768	-4374.54	-44.379	-4242.84	-38.2669
-4378.19	-43.1897	-4459.03	-29.3407	-4450.09	-47.2891	-4325.65	-37.5162	-4475.26	-44.5886	-4342.53	-38.4735
-4478.61	-43.3123	-4559.56	-29.6716	-4549.74	-47.4344	-4424.59	-37.6659	-4574.74	-44.7604	-4443.18	-38.6187
-4577.89	-43.4214	-4659.09	-29.7637	-4649.43	-47.583	-4525.46	-37.8178	-4674.92	-44.8599	-4542.71	-38.7151
-4678.25	-43.5177	-4759.71	-29.8433	-4750.13	-47.7306	-4624.44	-37.9343	-4774.39	-44.9205	-4642.98	-38.8429
-4777.69	-43.6331	-4858.76	-29.9181	-4848.91	-47.8672	-4725	-38.0782	-4875.04	-45.1656	-4741.68	-38.9248
-4878.86	-43.7437	-4959.21	-29.9972	-4949.85	-47.8712	-4825.49	-38.2176	-4974.83	-45.3002	-4843.28	-39.1012
-4978.86	-43.8407	-5058.18	-30.0727	-5049.19	-48.018	-4924.87	-38.3448	-5073.96	-45.4055	-4942.76	-39.2251
-5078.31	-43.935	-5159.14	-30.1291	-5149.77	-48.252	-5024.92	-38.4771	-5174.57	-45.4355	-5043.1	-39.3024
-5177.9	-44.008	-5258.3	-30.1851	-5248.59	-48.3637	-5124.46	-38.6174	-5274.58	-45.4663	-5142	-39.3894
-5277.62	-44.0968	-5359.58	-30.2447	-5348.64	-48.474	-5224.79	-38.7304	-5373.9	-45.6528	-5242.84	-39.4639
-5376.99	-44.184	-5459.55	-30.3059	-5448.73	-48.5717	-5323.82	-38.8367	-5474.28	-45.6996	-5341.45	-39.6435
-5477.39	-44.2625	-5558.29	-30.3571	-5548.35	-48.676	-5424.22	-38.934	-5573.58	-45.8474	-5442.42	-39.7417
-5571.99	-44.3311	-5647.08	-30.4241	-5644.1	-48.6002	-5524.53	-39.0658	-5665.65	-46.0424	-5540.86	-39.9231
-5661.54	-44.3953	-5746.59	-30.4509	-5732.77	-48.7627	-5612.78	-39.1269	-5760.95	-46.1546	-5625.19	-39.9498
-5777.86	-44.4743	-5857.96	-30.5101	-5847.62	-48.874	-5715.79	-39.2325	-5873.96	-46.2498	-5736.76	-40.0167
-5877.87	-44.534	-5959.72	-30.5758	-5948.72	-49.0545	-5823.89	-39.3231	-5974.12	-46.3225	-5841.23	-40.1352
-5977.49	-44.5982	-6060.21	-30.608	-6047.85	-49.127	-5924.06	-39.3779	-6073.99	-46.4231	-5940.67	-40.2422
-6077.41	-44.6663	-6158.79	-30.6536	-6149.03	-49.1797	-6024.02	-39.4789	-6173.75	-46.5163	-6041.47	-40.3172
-6176.84	-44.7348	-6258.78	-30.6928	-6247.7	-49.2	-6124.17	-39.5217	-6274.08	-46.5562	-6141.86	-40.3768
-6277.68	-44.7855	-6359.01	-30.721	-6349.28	-49.2385	-6224.17	-39.6543	-6374.2	-46.645	-6241.57	-40.5058
-6376.83	-44.845	-6458.33	-30.7776	-6448.21	-49.3085	-6324.14	-39.7416	-6473.98	-46.7215	-6342.31	-40.5443
-6477.86	-44.8995	-6559.49	-30.8114	-6549.83	-49.3072	-6425.17	-39.789	-6573.94	-46.7191	-6441.47	-40.6163
-6577.26	-44.954	-6658.23	-30.8611	-6648.63	-49.3901	-6524.72	-39.8974	-6672.94	-46.7491	-6541.91	-40.7481
-6678.07	-45.0005	-6759.93	-30.8954	-6749.8	-49.5419	-6624.88	-39.9712	-6774.18	-46.9415	-6641.49	-40.8363
-6778.8	-45.0516	-6858.56	-30.9322	-6848.6	-49.642	-6724.47	-40.0173	-6874.64	-46.994	-6742.27	-40.8782
-6878.86	-45.1102	-6959	-30.9578	-6949.36	-49.6201	-6825	-40.0993	-6974	-47.0885	-6842.47	-40.955
-6977.31	-45.1522	-7059.21	-30.9873	-7047.84	-49.6902	-6924.36	-40.1344	-7073.84	-47.1418	-6942.4	-41.0251
-7078.28	-45.1997	-7159.27	-31.0285	-7149.6	-49.8398	-7024.15	-40.1634	-7173.5	-47.2195	-7042.34	-41.1412
-7177.24	-45.2445	-7258.75	-31.069	-7248.13	-49.8385	-7124.18	-40.2349	-7274.89	-47.2644	-7141.68	-41.1786
-7277.39	-45.2901	-7358.59	-31.0692	-7348.82	-49.9203	-7223.55	-40.3295	-7372.74	-47.3413	-7241.89	-41.2071
-7378.09	-45.3347	-7457.27	-31.1152	-7447.88	-49.9815	-7324.06	-40.4148	-7474.25	-47.3799	-7341.35	-41.2845
-7476.82	-45.3616	-7558.92	-31.1559	-7547.33	-49.977	-7424.41	-40.4452	-7572.39	-47.4299	-7440.82	-41.3508
-7577.38	-45.416	-7657.31	-31.1828	-7648.23	-50.1714	-7523.39	-40.4986	-7673.15	-47.2032	-7540.95	-41.4745
-7676.37	-45.4365	-7755.26	-31.2034	-7747.1	-50.0618	-7623.64	-40.4794	-7772.01	-47.349	-7641.01	-41.4836
-7761.1	-45.4817	-7837.49	-31.2155	-7831.93	-50.1467	-7724.27	-40.5581	-7857.04	-47.5305	-7740.61	-41.5676
-7872.22	-45.5273	-7958.33	-31.2465	-7943.93	-50.1572	-7803.23	-40.5992	-7970.15	-47.6313	-7833.43	-41.6155
-7977.11	-45.5509	-8058.64	-31.2877	-8047.86	-50.292	-7923.92	-40.6614	-8073.02	-47.5403	-7929.45	-41.6454
-8076.39	-45.5601	-8155.8	-31.3061	-8147.37	-50.2311	-8022.8	-40.7208	-8173.16	-47.6954	-8041.12	-41.7582
-8176.26	-45.6325	-8258.29	-31.3206	-8248.01	-50.3896	-8123.7	-40.7871	-8272.94	-47.7856	-8140.88	-41.8208
-8276.95	-45.655	-8356.3	-31.3339	-8348.07	-50.3341	-8222.32	-40.8239	-8372.72	-47.6822	-8241.01	-41.9056
-8376.66	-45.6784	-8458.03	-31.3647	-8447.32	-50.3889	-8323.55	-40.8691	-8472.46	-47.8346	-8340.72	-41.9683
-8477.14	-45.7232	-8558.51	-31.3967	-8547.11	-50.4364	-8423.88	-40.9066	-8573.06	-47.9291	-8440.7	-41.9468
-8576.25	-45.7726	-8657.77	-31.4319	-8647.32	-50.4922	-8523.2	-40.9402	-8672.92	-47.933	-8540.6	-42.0324
-8676.86	-45.7918	-8757.14	-31.4305	-8747.26	-50.6457	-8624.33	-41.0202	-8773.2	-48.001	-8640.73	-42.0501
-8776.23	-45.8166	-8856.16	-31.4342	-8847.41	-50.6296	-8722.25	-41.0378	-8872.57	-48.0266	-8739.63	-42.1139
-8876.54	-45.8483	-8957.62	-31.4725	-8948.14	-50.6103	-8823.3	-41.0411	-8972.88	-48.0806	-8840.21	-42.1503
-8975.89	-45.8761	-9057.94	-31.5068	-9046.85	-50.7143	-8923.29	-41.0986	-9073.62	-48.1157	-8941.8	-42.1944
-9075.79	-45.8951	-9156.34	-31.4958	-9147.72	-50.6313	-9022.41	-41.1031	-9172.39	-48.1577	-9040.14	-42.3017
-9173.38	-45.9103	-9254.48	-31.5379	-9247.16	-50.7292	-9120.35	-41.1266	-9272.02	-48.0602	-9136.69	-42.2999
-9260.65	-45.9451	-9351.18	-31.5667	-9341.56	-50.7674	-9221.17	-41.2044	-9366.5	-48.2192	-9238.61	-42.3212
-9370.95	-45.9793	-9465.28	-31.5796	-9451.66	-50.9069	-9340.51	-41.26	-9479.05	-48.2718	-9363.95	-42.3823
-9500.87	-46.0183	-9600.18	-31.6181	-9580.79	-50.8652	-9478.16	-41.3049	-9609.53	-48.3249	-9502.68	-42.4643
-9645.93	-46.0548	-9746.6	-31.6442	-9725.39	-50.9936	-9629.53	-41.3749	-9756.07	-48.3743	-9657.24	-42.541
-9803.26	-46.0953	-9909.04	-31.6576	-9883.57	-51.0671	-9791.41	-41.4304	-9913.2	-48.3934	-9820.41	-42.6225
-9969.01	-46.1481	-10078.6	-31.7035	-10050.8	-51.0136	-9962.06	-41.4862	-10081.8	-48.4482	-9993.35	-42.7557
-10142.9	-46.187	-10253	-31.7247	-10223.4	-51.0718	-10140.2	-41.5497	-10256.9	-48.5144	-10171.4	-42.795
-10309.8	-46.2111	-10413.1	-31.7672	-10395.8	-50.9983	-10321.2	-41.635	-10427.6	-48.5371	-10353.3	-42.8343
-10484.9	-46.2499	-10596.2	-31.7664	-10549.5	-51.175	-10485.8	-41.6752	-10591.9	-48.5778	-10511.6	-42.8947
-10695.6	-46.2853	-10808.3	-31.8017	-10774.1	-51.273	-10683.9	-41.7642	-10809.1	-48.6855	-10722.3	-43.0005
-10886.3	-46.35	-10999.5	-31.8353	-10967.6	-51.3141	-10890.3	-41.7939	-11000.3	-48.566	-10923.7	-43.126
-11078.7	-46.3885	-11189.7	-31.8483	-11157.7	-51.3565	-11084	-41.8503	-11193.5	-48.6435	-11115.4	-43.2023
-11273.3	-46.4185	-11385.8	-31.871	-11354.6	-51.3989	-11279.4	-41.8946	-11387.5	-48.8347	-11314.5	-43.2231
-11468.7	-46.4534	-11581.6	-31.9124	-11550.8	-51.4991	-11475.2	-41.9278	-11585.7	-48.7255	-11511.1	-43.2918
-11665.1	-46.4918	-11778.6	-31.9242	-11746.2	-51.6024	-11671.2	-42.0079	-11781	-48.9339	-11707.1	-43.4133
-11862.7	-46.5259	-11975.6	-31.9572	-11944.9	-51.5574	-11870.4	-42.0754	-11979.4	-48.993	-11906.6	-43.4318
-12063.3	-46.5642	-12172	-31.9964	-12141.7	-51.6178	-12069.4	-42.1089	-12174.9	-49.0172	-12101.7	-43.4865
-12258.8	-46.6034	-12371.8	-32.0056	-12340	-51.5956	-12268.2	-42.1294	-12375.4	-49.081	-12302	-43.5125
-12460.2	-46.6454	-12570.7	-32.025	-12541.1	-51.6231	-12467.2	-42.1938	-12575.9	-49.1179	-12500.9	-43.625
-12654.9	-46.6632	-12770.9	-32.0629	-12736.1	-51.7211	-12665.5	-42.2345	-12773.1	-49.1674	-12699.8	-43.7592
-12857.7	-46.697	-12968	-32.0844	-12938	-51.806	-12864.6	-42.27	-12972.9	-49.1384	-12899.9	-43.8074
-13053.3	-46.7245	-13168.4	-32.1023	-13138	-51.886	-13064.2	-42.3205	-13169.2	-49.2386	-13098.9	-43.8727
-13255.4	-46.7731	-13367.4	-32.1212	-13335.7	-51.9348	-13263.1	-42.3731	-13371.9	-49.28	-13298	-43.9372
-13451	-46.8001	-13565.9	-32.1437	-13536.2	-51.9442	-13462.2	-42.4223	-13570.6	-49.3017	-13498.1	-43.9964
-13652.6	-46.8324	-13763.7	-32.1684	-13733.2	-51.9849	-13661.1	-42.4678	-13767.1	-49.3563	-13696.1	-44.0466
-13850.2	-46.8586	-13961	-32.1641	-13934.6	-51.9953	-13862.5	-42.495	-13968.2	-49.3806	-13894.5	-44.1182
-14051	-46.8863	-14163	-32.2057	-14131.5	-51.9852	-14059.1	-42.5501	-14166.8	-49.2657	-14093.8	-44.1692
-14250.5	-46.8683	-14359.3	-32.2344	-14332	-52.0449	-14259.4	-42.5966	-14365.1	-49.4342	-14293.2	-44.2185
-14449.6	-46.92	-14560.7	-32.2416	-14529	-52.0145	-14458.4	-42.6281	-14564.2	-49.5008	-14491.2	-44.2775
-14614.4	-46.9799	-14719.3	-32.2385	-14703.8	-52.1809	-14654.7	-42.678	-14724	-49.5348	-14692.4	-44.3437
-14828.7	-47.0038	-14956.2	-32.2731	-14910.3	-52.2148	-14815	-42.7339	-14952.8	-49.5296	-14872	-44.3931
-15041.7	-47.0271	-15155.3	-32.2879	-15125.1	-52.2396	-15051.6	-42.7876	-15160.2	-49.6025	-15064.7	-44.3886
-15240.6	-47.0587	-15353.8	-32.3045	-15325.4	-52.2794	-15252.4	-42.8527	-15357.6	-49.6246	-15285.2	-44.384
-15437.1	-47.0746	-15548.2	-32.31	-15522.1	-52.3011	-15447.7	-42.8603	-15556.7	-49.6464	-15483.9	-44.505
-15620.4	-47.0506	-15679.9	-32.2745	-15706.7	-52.2757	-15575.3	-42.8426	-15714.3	-49.6435	-15681.8	-44.5814
-15610.7	-46.9491	-15610.3	-32.2298	-15696.5	-52.0371	-15501.9	-42.8173	-15668.6	-49.5603	-15761	-44.5241
-15508.9	-46.9747	-15493.1	-32.2633	-15592.2	-52.0899	-15384.6	-42.8535	-15557.4	-49.598	-15676.7	-44.5067
-15376.3	-47.0015	-15351.9	-32.2712	-15457.6	-52.1741	-15239.8	-42.8177	-15419.4	-49.5443	-15552.5	-44.441
-15224.4	-47.0125	-15192.8	-32.2805	-15302.5	-52.1438	-15081.5	-42.7861	-15261.8	-49.5914	-15406.3	-44.4267
-15056.6	-47.0195	-15022.1	-32.2942	-15133.1	-52.2343	-14907.6	-42.8201	-15093.1	-49.5403	-15242.4	-44.3551
-14879.2	-47.0141	-14845.3	-32.2759	-14955.2	-52.1402	-14729.4	-42.794	-14912.1	-49.3718	-15068.9	-44.3722
-14696.4	-47.0129	-14656.3	-32.2571	-14772.7	-52.0271	-14541	-42.7223	-14728.3	-49.5678	-14886.7	-44.3823
-14505.4	-46.9803	-14466.3	-32.2566	-14581.5	-52.1151	-14350.5	-42.7384	-14537.3	-49.5203	-14696.6	-44.3508
-14313.6	-46.9671	-14272.6	-32.2304	-14387.3	-52.1494	-14155.1	-42.707	-14343.9	-49.2923	-14507.5	-44.2403
-14116.1	-46.9155	-14074.6	-32.2205	-14191.1	-51.9539	-13959.4	-42.681	-14144.5	-49.4702	-14309.8	-44.2397
-13919.3	-46.9077	-13876.6	-32.2039	-13993.9	-51.994	-13759.5	-42.625	-13946.7	-49.4414	-14115.7	-44.1684
-13719.5	-46.882	-13676.1	-32.1753	-13793.7	-52.0357	-13558.4	-42.6013	-13747.8	-49.2969	-13915	-44.1509
-13520	-46.8655	-13474.1	-32.1544	-13593.6	-52.0261	-13360.3	-42.5078	-13547.9	-48.9712	-13716.6	-44.0975
-13318.7	-46.8276	-13275.2	-32.1424	-13393.4	-51.9914	-13157.9	-42.4784	-13347.9	-49.1838	-13514.1	-43.9982
-13119.6	-46.7904	-13072.6	-32.1242	-13192.2	-51.8875	-12956.9	-42.4644	-13145.5	-49.2899	-13312.9	-44.0027
-12925.3	-46.7715	-12872.5	-32.0932	-12999.2	-51.7616	-12756.9	-42.4121	-12944.1	-49.2552	-13111.5	-43.9424
-12756.9	-46.7474	-12694.7	-32.0558	-12829.1	-51.7063	-12556	-42.3711	-12751.7	-49.2051	-12909.3	-43.8614
-12511.9	-46.6904	-12483.6	-32.0434	-12588.5	-51.7148	-12371.3	-42.3518	-12573.5	-49.188	-12741.4	-43.8118
-12312	-46.6691	-12267.8	-32.0415	-12385.7	-51.6713	-12176.5	-42.2873	-12342.4	-48.9352	-12514	-43.7417
-12109.1	-46.6491	-12065.9	-32.0183	-12184.5	-51.771	-11951.2	-42.2221	-12139.9	-49.0177	-12307.3	-43.6104
-11910.3	-46.6044	-11864.7	-31.9916	-11986.2	-51.7215	-11749.7	-42.2082	-11937.4	-49.0444	-12105.3	-43.5586
-11707.8	-46.575	-11663.4	-31.9708	-11782.3	-51.5949	-11549.2	-42.1762	-11738.5	-48.9999	-11903.3	-43.5056
-11506.2	-46.5405	-11464	-31.9396	-11582.9	-51.5888	-11349.3	-42.0916	-11535.1	-48.9542	-11702.8	-43.4653
-11304.6	-46.5139	-11262.2	-31.9282	-11380.9	-51.3498	-11147.3	-42.032	-11334.7	-48.8651	-11501	-43.4169
-11105	-46.472	-11063	-31.8888	-11181	-51.4904	-10946.4	-41.9121	-11133.2	-48.6555	-11299.8	-43.3414
-10904.4	-46.4318	-10860.9	-31.8806	-10978.5	-51.4678	-10746.4	-41.8923	-10933.1	-48.8048	-11097.7	-43.2782
-10701.7	-46.3881	-10659.4	-31.8456	-10776.2	-51.3902	-10545.1	-41.8601	-10732.3	-48.6241	-10898.8	-43.1587
-10506.5	-46.3393	-10472.7	-31.8117	-10576.8	-51.2157	-10391.4	-41.7761	-10530.5	-48.4624	-10698.4	-43.0864
-10378.2	-46.2803	-10358.7	-31.7667	-10412.6	-51.2363	-10290.9	-41.7041	-10389.6	-48.6154	-10502.4	-43.0552
-10290.3	-46.2611	-10274.8	-31.7511	-10316.9	-51.2421	-10231.6	-41.6929	-10298.1	-48.4473	-10372	-42.9501
-10222.7	-46.2477	-10212.5	-31.7392	-10242	-51.109	-10176.8	-41.6689	-10228.2	-48.5576	-10284.6	-42.8925
-10169.8	-46.2207	-10162.8	-31.7065	-10184.2	-51.223	-10133.6	-41.6439	-10173.3	-48.5342	-10217.6	-42.8169
-10129.3	-46.1975	-10123.6	-31.7005	-10140	-51.1938	-10101.1	-41.6524	-10131.7	-48.3903	-10165.3	-42.7951
-10097.8	-46.1739	-10091.2	-31.7203	-10105.5	-51.1078	-10075.4	-41.6292	-10099	-48.3183	-10125.3	-42.7927
-10071	-46.1694	-10069.9	-31.7099	-10075.4	-51.0984	-10047.6	-41.6189	-10071.6	-48.4895	-10093.9	-42.7995
-10025.5	-46.1688	-10043.6	-31.6848	-10027.5	-51.1577	-9996.79	-41.5986	-10026.5	-48.4701	-10053.4	-42.7909
-9968.43	-46.1551	-9992.5	-31.6894	-9968.31	-51.1549	-9936.52	-41.6016	-9968.06	-48.471	-9998.31	-42.7345
-9901.59	-46.1889	-9930.47	-31.6876	-9900.04	-51.1338	-9865.69	-41.5739	-9900.76	-48.4493	-9933.25	-42.7866
-9836.04	-46.1649	-9873.85	-31.6775	-9833.92	-51.0801	-9789.32	-41.5432	-9834.73	-48.4297	-9860.11	-42.7777
-9755.72	-46.1466	-9782.77	-31.6689	-9749.52	-51.0465	-9720.44	-41.5464	-9751.43	-48.4139	-9785.21	-42.6888
-9661.23	-46.1167	-9700.85	-31.6516	-9657.78	-51.0734	-9623.6	-41.5011	-9658.64	-48.3836	-9710.83	-42.6788
-9572.09	-46.0868	-9614.91	-31.6445	-9568.27	-50.9415	-9529.69	-41.4851	-9569.36	-48.2916	-9608.93	-42.625
-9480.68	-46.0752	-9523.56	-31.6265	-9475.79	-50.9002	-9436.36	-41.4683	-9477.66	-48.1996	-9517.77	-42.5918
-9387.16	-46.0654	-9431.18	-31.6071	-9381.68	-50.9498	-9342.86	-41.4162	-9384.2	-48.3051	-9426.14	-42.5561
-9292.17	-46.0445	-9336.23	-31.5917	-9286.33	-50.8253	-9247.22	-41.3811	-9288.6	-48.273	-9330.03	-42.5513
-9196.03	-46.0204	-9242.67	-31.5739	-9190.04	-50.7317	-9149.62	-41.3548	-9191.75	-48.2488	-9235.54	-42.4123
-9099.62	-45.9926	-9143.19	-31.5533	-9092.91	-50.8545	-9053.35	-41.3242	-9093.89	-48.2078	-9136.96	-42.424
-9001.02	-45.9646	-9045.54	-31.5267	-8995.24	-50.8362	-8954.72	-41.29	-8997.01	-48.1435	-9038.62	-42.4025
-8902.58	-45.9278	-8949.14	-31.5296	-8896.65	-50.7986	-8856.03	-41.2514	-8898.43	-48.1327	-8941.46	-42.3746
-8803.75	-45.9078	-8848.86	-31.4988	-8798.7	-50.6166	-8757.72	-41.2345	-8800.56	-48.0838	-8842.69	-42.3195
-8705.07	-45.8766	-8751.71	-31.4787	-8697.99	-50.5663	-8658.12	-41.2023	-8700.85	-48.0505	-8743.35	-42.2325
-8605.29	-45.8545	-8650.71	-31.466	-8599.11	-50.6283	-8557.9	-41.1583	-8602.03	-48.0206	-8645.19	-42.2226
-8505.56	-45.8265	-8552.34	-31.4496	-8499.6	-50.6273	-8458.58	-41.1142	-8500.93	-47.9769	-8544.92	-42.1527
-8406.85	-45.7984	-8455.35	-31.4242	-8400.07	-50.5701	-8358.79	-41.0585	-8401.9	-47.9312	-8445.37	-42.1289
-8306.66	-45.7593	-8353.59	-31.4058	-8300.31	-50.4588	-8259.66	-41.0371	-8302.12	-47.8905	-8345.95	-42.0799
-8208.29	-45.7194	-8258.07	-31.3743	-8200.93	-50.3944	-8160.03	-40.9921	-8203.57	-47.848	-8245.99	-42.0183
-8106.13	-45.6903	-8157.16	-31.3551	-8100.64	-50.3489	-8060.18	-40.9064	-8102.56	-47.8097	-8145.19	-41.9252
-8007.58	-45.6698	-8053.91	-31.3381	-7999.99	-50.3235	-7960.4	-40.873	-8003.42	-47.7696	-8046.22	-41.8522
-7906.73	-45.6261	-7954.5	-31.3089	-7901.01	-50.2681	-7859.83	-40.8342	-7902.36	-47.7053	-7946.31	-41.8337
-7807.42	-45.5891	-7854.65	-31.2828	-7799.96	-50.3058	-7760.07	-40.7668	-7802.61	-47.66	-7845.49	-41.7591
-7727.6	-45.5689	-7761.57	-31.2637	-7720.74	-50.302	-7664.06	-40.7126	-7722.73	-47.6185	-7746.06	-41.6604
-7606.44	-45.5288	-7665.83	-31.2287	-7599.94	-50.1975	-7575.07	-40.6677	-7602.93	-47.5515	-7658.92	-41.6081
-7508.14	-45.4798	-7554.35	-31.2031	-7501.68	-50.2035	-7459.72	-40.6015	-7502.76	-47.4788	-7554.34	-41.6271
-7407.29	-45.4439	-7456.51	-31.1726	-7400.35	-49.9806	-7359.37	-40.5607	-7401.41	-47.4439	-7445.9	-41.5555
-7306.34	-45.4025	-7353.69	-31.1471	-7301.31	-49.908	-7260.76	-40.5041	-7303.29	-47.3518	-7346.22	-41.4821
-7207.17	-45.3595	-7254.99	-31.117	-7200.15	-49.8591	-7159.35	-40.4436	-7202.19	-47.3178	-7245.68	-41.3703
-7106.35	-45.3199	-7152.77	-31.0872	-7101.05	-49.7955	-7060.6	-40.3824	-7103.61	-47.2737	-7146.85	-41.3532
-7007.27	-45.2835	-7054.33	-31.0579	-7000.27	-49.8436	-6959.04	-40.3194	-7002.16	-47.1314	-7046.87	-41.2504
-6906.24	-45.2409	-6953.21	-31.0289	-6900.71	-49.7291	-6859.66	-40.2715	-6903.29	-47.1214	-6945.34	-41.2434
-6806.29	-45.1899	-6853.93	-30.9979	-6799.81	-49.5977	-6758.07	-40.2058	-6801.87	-47.0975	-6844.73	-41.1663
-6706.16	-45.1441	-6753.39	-30.9576	-6698.99	-49.677	-6658.88	-40.1161	-6701.43	-47.0176	-6745.44	-41.0997
-6606.73	-45.0906	-6655.07	-30.9382	-6600.11	-49.6053	-6558.18	-40.0572	-6601.54	-46.9558	-6644.8	-40.9952
-6505.83	-45.0385	-6553.65	-30.905	-6499.49	-49.4944	-6458.9	-40.0059	-6500.96	-46.8709	-6544.99	-40.9474
-6405.26	-44.9803	-6452.88	-30.8607	-6399.68	-49.3989	-6358.63	-39.9313	-6401.66	-46.7829	-6444.77	-40.8771
-6305.87	-44.9365	-6353.19	-30.8207	-6299.68	-49.427	-6258.97	-39.8646	-6301.76	-46.7443	-6344.55	-40.8064
-6205.62	-44.8786	-6252.36	-30.7822	-6199.23	-49.2482	-6158.31	-39.7832	-6201.63	-46.6624	-6245.37	-40.7259
-6105.73	-44.8203	-6150.99	-30.7522	-6098.66	-49.1173	-6059.05	-39.7235	-6101.64	-46.5887	-6144.54	-40.6467
-6006.06	-44.7763	-6052.84	-30.7026	-5998.93	-49.0399	-5958.47	-39.6427	-6001.44	-46.5049	-6044.33	-40.5612
-5906.31	-44.7227	-5952.4	-30.6585	-5898.82	-49.0417	-5857.85	-39.552	-5901.57	-46.4289	-5944.08	-40.4707
-5805.88	-44.6472	-5853.27	-30.6335	-5799.63	-48.9086	-5757.94	-39.4532	-5801.92	-46.3379	-5844.66	-40.3678
-5706.35	-44.5813	-5753.05	-30.5838	-5699.29	-48.8493	-5658.82	-39.379	-5701.58	-46.2484	-5744.84	-40.2959
-5606.22	-44.504	-5654.53	-30.5205	-5600.19	-48.6986	-5559.22	-39.2793	-5601.57	-46.1557	-5645.67	-40.2133
-5514.04	-44.4546	-5570.03	-30.4792	-5511.75	-48.6608	-5459.32	-39.1852	-5513.47	-46.0571	-5545.3	-40.1146
-5417.9	-44.3645	-5458.03	-30.4299	-5407.63	-48.5335	-5371.17	-39.1334	-5409.43	-45.9567	-5465.64	-40.0332
-5306.04	-44.2926	-5353.04	-30.366	-5300.72	-48.5128	-5266.37	-39.0086	-5301.75	-45.8457	-5345.54	-39.9143
-5205.92	-44.2115	-5254.12	-30.3133	-5200.13	-48.2982	-5157.93	-38.8931	-5202.08	-45.7513	-5245.84	-39.8229
-5106.11	-44.1369	-5153.21	-30.269	-5099.63	-48.1831	-5058.06	-38.7818	-5102.1	-45.6244	-5143.87	-39.7098
-5005.69	-44.0554	-5053.93	-30.2028	-4999.18	-48.1305	-4958.64	-38.6786	-5001.52	-45.5116	-5045.56	-39.5767
-4905.99	-43.9629	-4953.3	-30.1241	-4899.87	-48.137	-4858.58	-38.5811	-4901.47	-45.39	-4944.22	-39.4945
-4805.64	-43.8727	-4853.5	-30.0707	-4798.97	-48.0017	-4758.38	-38.4416	-4801.15	-45.2731	-4846.03	-39.3569
-4705.29	-43.7659	-4753.25	-30.015	-4699.24	-47.8608	-4658.2	-38.339	-4701.43	-45.1398	-4744.44	-39.2731
-4605.14	-43.6747	-4652.48	-29.9324	-4599.27	-47.641	-4558.35	-38.2198	-4600.83	-44.8124	-4645.46	-39.1073
-4505.47	-43.5649	-4552.38	-29.8529	-4498.85	-47.4526	-4458.05	-38.0755	-4501.3	-44.7917	-4544.33	-39.0274
-4405.26	-43.4538	-4453.1	-29.7843	-4398.65	-47.4122	-4358.19	-37.9403	-4400.75	-44.7272	-4444.35	-38.8933
-4305.45	-43.3422	-4351.72	-29.7106	-4298.73	-47.1405	-4257.7	-37.7906	-4293.32	-44.5621	-4343.49	-38.7317
-4205.19	-43.2173	-4251.72	-29.6107	-4198.66	-47.028	-4158.35	-37.6337	-4229.57	-44.4727	-4244.24	-38.5958
-4105.36	-43.0915	-4152.35	-29.511	-4098.05	-46.9467	-4057.54	-37.4723	-4201.48	-44.4228	-4143.69	-38.4256
-4005.95	-42.9451	-4051.51	-29.4272	-3998.44	-46.6112	-3957.38	-37.3075	-4100.39	-44.2533	-4043.65	-38.3058
-3904.88	-42.8051	-3952.12	-29.3288	-3898.44	-46.4368	-3857.19	-37.1371	-4000.36	-44.0762	-3943.49	-38.1495
-3805.28	-42.6489	-3851.5	-29.2284	-3798.83	-46.2179	-3757.88	-36.9506	-3900.4	-43.8954	-3844.06	-38.0125
-3704.81	-42.4874	-3751.31	-29.1017	-3698.71	-46.0007	-3657.87	-36.7448	-3800.89	-43.7088	-3744.96	-37.8476
-3604.08	-42.3088	-3651.3	-28.9958	-3599.97	-45.8366	-3557.92	-36.5605	-3701.52	-43.5085	-3644.48	-37.6499
-3505.63	-42.1208	-3552.54	-28.8589	-3498.68	-45.6708	-3457.8	-36.3417	-3600.12	-43.2868	-3543.69	-37.4846
-3404.34	-41.9256	-3452.5	-28.733	-3398.24	-45.3083	-3357.14	-36.1194	-3500.49	-42.9711	-3444.5	-37.2802
-3326.06	-41.7593	-3364.55	-28.6278	-3318.88	-45.1914	-3257.91	-35.8683	-3401.12	-42.6587	-3343.97	-37.0623
-3205.17	-41.4929	-3264.17	-28.4612	-3198.27	-44.789	-3176.94	-35.6682	-3304.57	-42.5646	-3256.07	-36.8599
-3105.83	-41.2548	-3152.16	-28.2814	-3097.61	-44.4302	-3057.77	-35.3672	-3216.16	-42.3733	-3151.75	-36.5894
-3004.62	-40.9854	-3052.05	-28.1307	-2999.04	-44.0679	-2957.01	-35.067	-3100.78	-42.0368	-3044.49	-36.3053
-2905.05	-40.7114	-2952.15	-27.9371	-2898.28	-43.7633	-2857.53	-34.7846	-3001.25	-41.7374	-2943.11	-36.051
-2803.39	-40.3939	-2851.99	-27.7529	-2798.83	-43.3266	-2756.33	-34.4503	-2900.45	-41.419	-2843.7	-35.7377
-2704.64	-40.06	-2752.16	-27.5405	-2698.29	-42.9716	-2658.42	-34.1038	-2799.81	-41.0464	-2743.29	-35.4226
-2604.19	-39.7062	-2651.85	-27.3331	-2597.85	-42.5673	-2557.24	-33.7185	-2700.36	-40.7072	-2643.99	-35.0643
-2505.42	-39.3225	-2552.01	-27.0817	-2498.6	-42.0481	-2456.83	-33.3325	-2599.81	-40.2805	-2543.67	-34.6907
-2404.62	-38.8785	-2451.51	-26.8117	-2398.27	-41.3917	-2357.13	-32.93	-2500.92	-39.9148	-2443.55	-34.27
-2305.79	-38.4014	-2352.19	-26.5237	-2298.76	-40.8866	-2257.26	-32.4583	-2399.99	-39.4272	-2344.64	-33.8269
-2204.72	-37.8695	-2251.98	-26.2254	-2198.93	-40.2867	-2157.67	-31.9622	-2301.23	-38.9475	-2244	-33.321
-2105.14	-37.2901	-2152.55	-25.8994	-2098.88	-39.4781	-2057.17	-31.4639	-2200.45	-38.389	-2143.48	-32.784
-2005.4	-36.6596	-2052.49	-25.5204	-1998.59	-38.7678	-1958.33	-30.8944	-2101.62	-37.8252	-2043.72	-32.2351
-1904.81	-35.9454	-1951.35	-25.0812	-1899.09	-38.0541	-1858	-30.2912	-2000.94	-37.1787	-1944.02	-31.5941
-1805.48	-35.2022	-1853.01	-24.6369	-1798.88	-37.1704	-1758.49	-29.6456	-1901.55	-36.5183	-1844.5	-30.9289
-1704.87	-34.3532	-1751.59	-24.1047	-1699.35	-36.2139	-1657.84	-28.9315	-1801.03	-35.7544	-1744.62	-30.1803
-1605.7	-33.4447	-1653.08	-23.5432	-1598.4	-35.1013	-1557.72	-28.1835	-1701.28	-34.9913	-1645.43	-29.4243
-1505.34	-32.4482	-1551.97	-22.8778	-1498.26	-34.0172	-1458.6	-27.3488	-1600.83	-34.0966	-1544.58	-28.576
-1405.68	-31.3796	-1453.31	-22.1809	-1398.77	-32.818	-1358.37	-26.4657	-1500.66	-33.1019	-1444.96	-27.6523
-1305.26	-30.1792	-1352.18	-21.386	-1299.04	-31.5056	-1257.11	-25.5018	-1401.13	-32.1752	-1344.7	-26.6757
-1205.25	-28.8691	-1253.43	-20.5344	-1198.96	-30.1708	-1157.3	-24.499	-1301.05	-31.0685	-1243.71	-25.5627
-1112.79	-27.5757	-1172.6	-19.7734	-1107.21	-28.7476	-1057.88	-23.3616	-1201.1	-29.8709	-1143.92	-24.3957
-1017.39	-26.1025	-1052.65	-18.553	-1011.55	-27.0837	-970.535	-22.2892	-1113.22	-28.6868	-1048.46	-23.1895
-905.133	-24.2429	-952.585	-17.42	-899.028	-25.0986	-870.192	-20.9706	-1008.82	-27.1175	-960.466	-21.9945
-805.663	-22.4387	-852.365	-16.1808	-799.593	-23.1516	-758.672	-19.3823	-900.714	-25.4535	-844.738	-20.2808
-705.392	-20.4769	-752.56	-14.8884	-698.901	-21.0023	-658.418	-17.8327	-801.656	-23.699	-745.539	-18.6755
-606.866	-18.3372	-666.999	-13.5107	-600.017	-18.7777	-562.264	-16.1127	-705.163	-21.7878	-644.465	-16.8979
-567.335	-16.9387	-648.535	-12.9964	-560.554	-17.2783	-528.552	-15.1	-671.573	-20.6622	-580.255	-15.3414
-555.764	-16.5972	-637.85	-12.8306	-549.024	-16.909	-517.516	-14.8467	-660.378	-20.3894	-568.01	-14.9418
-544.555	-16.3313	-626.527	-12.6538	-537.836	-16.6362	-506.272	-14.6292	-648.966	-20.1447	-557.278	-14.7205
-532.38	-16.0501	-614.068	-12.478	-525.533	-16.3522	-493.89	-14.3857	-636.899	-19.8806	-545.22	-14.4899
-519.05	-15.7351	-600.537	-12.2737	-512.032	-16.0192	-480.518	-14.1272	-623.156	-19.588	-532.446	-14.2352
-504.595	-15.3884	-585.737	-12.0443	-497.481	-15.6125	-465.818	-13.8333	-608.57	-19.2607	-518.183	-13.9371
-488.977	-15.0179	-570.202	-11.797	-481.917	-15.2499	-450.277	-13.5237	-592.967	-18.9218	-503.091	-13.6411
-472.744	-14.6293	-553.511	-11.5352	-465.436	-14.8291	-433.75	-13.1845	-576.424	-18.5476	-486.785	-13.3026
-455.615	-14.1917	-536.151	-11.2616	-448.376	-14.3902	-416.606	-12.832	-559.383	-18.1536	-469.729	-12.9464
-438.151	-13.766	-518.682	-10.9712	-430.506	-13.9352	-398.829	-12.4357	-541.362	-17.733	-452.383	-12.5772
-419.882	-13.3	-500.436	-10.678	-412.479	-13.4606	-380.57	-12.0372	-523.15	-17.2911	-434.259	-12.1828
-401.223	-12.825	-481.969	-10.3657	-393.751	-12.9578	-362.172	-11.6325	-504.973	-16.8573	-415.907	-11.7861
-382.759	-12.3491	-463.092	-10.0474	-375.194	-12.4253	-343.136	-11.1997	-485.918	-16.3788	-397.146	-11.3821
-363.588	-11.8383	-443.981	-9.72779	-355.872	-11.8853	-324.335	-10.7597	-467.039	-15.9014	-378.123	-10.9497
-344.535	-11.3296	-424.634	-9.39629	-336.835	-11.3895	-304.849	-10.298	-447.449	-15.3948	-358.781	-10.5138
-325.004	-10.791	-405.147	-9.06246	-317.315	-10.8034	-285.633	-9.82565	-428.368	-14.8983	-339.318	-10.0631
-308.576	-10.3579	-386.489	-8.73758	-300.893	-10.3585	-265.884	-9.3279	-408.63	-14.3676	-320.167	-9.60626
-286.658	-9.74617	-368.797	-8.43111	-278.975	-9.7373	-250.444	-8.94233	-391.845	-13.9116	-303.658	-9.21909
-266.098	-9.16269	-346.326	-8.02861	-258.538	-9.16069	-226.668	-8.32504	-369.944	-13.301	-282.401	-8.70725
-246.446	-8.601	-326.415	-7.65394	-238.763	-8.57318	-206.86	-7.79516	-349.2	-12.7141	-261.087	-8.18663
-226.581	-8.01413	-306.391	-7.28195	-218.671	-7.97865	-187.212	-7.27053	-329.536	-12.1547	-241.074	-7.68419
-206.619	-7.42332	-286.88	-6.92495	-199.045	-7.41251	-167.146	-6.71264	-309.455	-11.5685	-221.409	-7.19924
-187.007	-6.84834	-266.877	-6.53669	-178.986	-6.81563	-147.12	-6.15855	-289.937	-10.9826	-201.486	-6.68524
-166.922	-6.24453	-246.876	-6.14836	-159.184	-6.21901	-127.389	-5.60114	-269.878	-10.3775	-181.424	-6.16999
-149.189	-5.66851	-231.009	-5.80325	-141.467	-5.65431	-109.152	-5.03947	-251.305	-9.78177	-162.411	-5.65133
-138.698	-5.30918	-220.207	-5.57058	-130.957	-5.30104	-98.1402	-4.67251	-239.712	-9.36124	-150.356	-5.28211
-127.021	-4.97199	-207.896	-5.34016	-119.383	-4.96564	-86.2912	-4.33045	-228.044	-9.01556	-138.783	-4.98005
-113.959	-4.58822	-194.444	-5.06323	-106.264	-4.59051	-72.9983	-3.95114	-214.768	-8.61386	-125.592	-4.64005
-99.3819	-4.15284	-179.48	-4.75258	-91.697	-4.16901	-58.0935	-3.49622	-200.148	-8.15981	-111.012	-4.25985
-83.8886	-3.69111	-163.646	-4.42013	-75.9853	-3.71139	-42.4165	-3.00825	-184.199	-7.65805	-95.3068	-3.84741
-67.4186	-3.18354	-146.796	-4.06412	-59.313	-3.22581	-25.6265	-2.46334	-167.642	-7.12807	-78.9157	-3.40024
-50.1141	-2.6458	-129.377	-3.69806	-42.1167	-2.69602	-8.12478	-1.83705	-150.451	-6.57277	-61.4506	-2.91681
-32.2891	-2.09104	-111.158	-3.29604	-24.0378	-2.1323	9.65386	-1.13752	-132.462	-5.97831	-43.6321	-2.415
-13.7656	-1.51417	-92.9124	-2.88681	-5.66845	-1.55711	27.9188	-1.28308	-114.036	-5.36827	-25.2166	-1.90256
4.58647	-0.85238	-74.3917	-2.4605	12.8584	-0.97042	46.3365	-0.93225	-95.503	-4.74049	-6.6551	-1.33343
16.7722	-0.94352	-64.4801	-2.18134	25.5762	-1.04525	58.468	-0.5772	-82.475	-4.22696	6.32072	-0.81586
27.8767	-0.83961	-52.9107	-1.9349	37.0242	-0.81996	69.7164	-0.29963	-71.3683	-3.85281	17.4111	-1.03636
40.4779	-0.62439	-39.6531	-1.6277	49.6355	-0.50818	82.5162	0.04968	-58.949	-3.45526	30.0566	-0.86045
53.3403	-0.35068	-27.727	-1.35596	63.2417	-0.13931	95.7147	0.41567	-44.6975	-2.99511	43.3771	-0.59528
67.49	-0.01324	-10.8004	-0.90286	76.6972	0.25415	109.557	0.8124	-30.1171	-2.50752	56.343	-0.30224
86.2505	0.46791	6.90738	-0.47175	95.4192	0.80262	128.669	1.37005	-15.493	-1.99508	76.003	0.16915
103.671	0.93445	24.2803	-0.581	112.728	1.31434	145.882	1.87582	4.04304	-1.14686	93.1179	0.59753
121.375	1.42291	42.0731	-0.37679	130.586	1.8429	163.784	2.41334	21.7247	-1.11344	111.067	1.0775
139.706	1.93303	60.6189	-0.04635	148.931	2.38934	181.982	2.96211	40.0359	-0.79353	129.331	1.5464
158.4	2.47468	79.4478	0.32069	167.809	2.95151	201.739	3.55242	58.8945	-0.26316	148.122	2.05263
177.707	3.04077	98.4329	0.71577	186.822	3.51616	223.35	4.17875	77.5999	0.31491	167.018	2.5542
196.663	3.59979	117.744	1.12537	206.033	4.09945	239.31	4.66761	97.0728	0.93632	186.532	3.0803
216.386	4.19303	137.195	1.53376	225.895	4.68673	259.007	5.23488	116.529	1.58407	206.138	3.60117
235.815	4.77422	156.83	1.95531	245.519	5.28015	278.517	5.79196	136.395	2.26125	225.449	4.11679
255.627	5.36291	176.561	2.36491	264.974	5.86567	298.227	6.35769	155.771	2.92095	245.731	4.6406
275.438	5.95229	196.364	2.80963	284.801	6.46854	317.887	6.91349	175.954	3.61442	265.23	5.15561
295.523	6.54596	216.178	3.23097	305.09	7.0727	338.09	7.46564	195.522	4.29272	285.083	5.66393
315.281	7.13042	236.313	3.66248	324.508	7.65307	357.652	7.99242	215.5	4.9818	305.02	6.18114
335.334	7.7291	255.948	4.08051	344.738	8.2696	377.862	8.52393	235.353	5.66572	324.792	6.68534
362.642	8.41191	276.31	4.51956	371.594	8.96076	403.116	9.08214	260.817	6.42073	350.241	7.24199
411.487	9.6557	309.921	5.08212	422.163	10.2924	447.332	10.0785	307.817	7.78926	397.414	8.25248
473.023	11.2984	361.227	6.042	483.005	11.936	506.745	11.408	369.087	9.67991	457.672	9.61813
542.492	13.0968	425.697	7.25596	554.51	13.8941	575.23	12.8902	437.928	11.7132	527.773	11.1574
620.312	15.0564	496.122	8.51456	632.408	15.9136	651.927	14.452	515.487	13.9167	604.289	12.7897
702.67	17.0328	576.495	9.9175	715.227	17.9501	733.175	15.9874	597.332	16.0804	686.933	14.4825
779.821	18.7431	643.864	11.0536	792.161	19.8641	820.74	17.5251	684.872	18.2379	773.685	16.1606
872.664	20.7411	747.752	12.7457	885.924	21.974	899.521	18.7924	763.992	20.0631	852.538	17.5809
972.624	22.7082	839.206	14.1435	986.701	24.0922	995.546	20.2446	860.723	22.1099	950.02	19.2457
1067.32	24.4232	932.248	15.4332	1080.68	25.9085	1096.7	21.6395	962.174	24.0336	1051.1	20.8301
1162.46	26.0328	1028.01	16.6668	1175.81	27.6263	1191.84	22.8602	1058	25.7267	1146.41	22.2122
1258.56	27.5396	1122.34	17.8146	1272.93	29.236	1288.72	23.9892	1154.88	27.3102	1243.07	23.5419
1356.54	28.9388	1219.93	18.8911	1370.07	30.5851	1386.62	25.0604	1252.26	28.7384	1340.31	24.7471
1454.72	30.2207	1316.42	19.8694	1468.79	32.0878	1484.54	26.0345	1349.25	30.0369	1438.68	25.8472
1553.19	31.4014	1414.79	20.7923	1567.48	33.3858	1582.82	26.9513	1448.11	31.249	1536.48	26.902
1651.83	32.4704	1512.95	21.6191	1665.55	34.5306	1681.09	27.782	1546.16	32.3349	1635.74	27.8473
1750.44	33.4628	1612.27	22.3518	1765.02	35.5478	1780.24	28.5574	1646.38	33.2742	1735.57	28.7539
1849.83	34.3664	1711.64	23.0371	1863.97	36.6201	1879.61	29.2884	1745.18	34.2437	1834.59	29.6065
1949.64	35.2056	1811.05	23.6639	1964.19	37.5624	1978.86	29.9506	1844.95	35.1218	1933.41	30.3708
2048.9	35.9693	1911.62	24.2221	2062.59	38.4037	2078.53	30.5622	1944.33	35.9004	2033.91	31.0895
2149.09	36.66	2009.69	24.7031	2163.72	39.1953	2179.18	31.1528	2043.92	36.6433	2132.96	31.7502
2247.76	37.2895	2109.52	25.1645	2262.66	39.8725	2278.84	31.7069	2144.5	37.3191	2232.6	32.361
2348.13	37.8638	2206.78	25.5558	2362.73	40.4889	2378.85	32.2041	2243.43	37.9541	2332.77	32.9454
2448.21	38.3879	2307.47	25.9278	2462.52	41.0359	2477.98	32.6645	2343.69	38.5248	2432.22	33.435
2548.98	38.8755	2406.51	26.2622	2562.66	41.7376	2578.1	33.119	2443.99	39.0611	2532.66	33.9147
2648.12	39.2916	2506.69	26.5727	2663.39	42.1377	2678.34	33.5228	2543.91	39.5504	2631.69	34.3907
2748.36	39.7039	2607.79	26.861	2762.49	42.5798	2777.96	33.8941	2643.06	39.9927	2733.49	34.7998
2848.18	40.0594	2708.59	27.1135	2863.84	43.0624	2878.42	34.2602	2743.66	40.4015	2832.56	35.1609
2944.79	40.384	2797.18	27.3148	2942.93	43.4304	2979.33	34.5742	2843.63	40.7998	2929.02	35.4623
3032.58	40.6462	2900.83	27.5515	3063.82	43.8734	3058.48	34.8375	2940.5	41.1542	3013.77	35.7177
3149.67	40.9612	3009.92	27.7732	3163.2	44.3043	3179.58	35.1831	3028.69	41.4536	3132.32	36.0793
3249.46	41.2195	3108.46	27.9708	3264.32	44.6035	3278.28	35.4374	3144.46	41.8125	3233.87	36.3117
3348.96	41.4729	3209.62	28.1497	3363.67	44.9222	3379.24	35.6773	3245.29	42.1166	3332.66	36.5934
3449.57	41.6995	3309.54	28.304	3464	45.1467	3477.86	35.8695	3344.5	42.385	3433.54	36.827
3548.51	41.9027	3408.57	28.4748	3562.64	45.4402	3579.02	36.0985	3444.61	42.6427	3533.67	37.0933
3649.09	42.1143	3509.82	28.6143	3663.31	45.6236	3677.79	36.3286	3543.35	42.8928	3633.06	37.2618
3747.76	42.2854	3610.11	28.7496	3762.55	45.996	3779.21	36.5797	3644.46	43.1183	3732.66	37.4911
3848.86	42.4553	3709.32	28.8838	3863.3	46.1106	3878.18	36.805	3743	43.3279	3832.53	37.6563
3947	42.6091	3809.46	29.0062	3962.37	46.2292	3978.46	36.9853	3843.83	43.5412	3934.15	37.8535
4048.45	42.7588	3907.31	29.1225	4062.66	46.6161	4077.74	37.1752	3943.31	43.7339	4031.44	38.0442
4148.85	42.9076	4007.35	29.2107	4162.25	46.7889	4177.93	37.3599	4043.45	43.9372	4132.69	38.2193
4247.91	43.0642	4108.03	29.3404	4262.76	46.9637	4277.24	37.5211	4143.35	44.1062	4231.58	38.3603
4348.16	43.1865	4209.32	29.4348	4362.52	47.1553	4377.83	37.6764	4242.93	44.2813	4332.12	38.4364
4448.61	43.2991	4307.68	29.5248	4462.86	47.153	4477.28	37.831	4344.39	44.4142	4433.2	38.6452
4547.72	43.4168	4408.43	29.6237	4562.47	47.4515	4578.05	37.9686	4443.17	44.4751	4532.41	38.7548
4648	43.5196	4509.01	29.7082	4662.51	47.4975	4678.09	38.0981	4543.84	44.757	4632.29	38.8835
4747.71	43.6366	4607.97	29.7966	4762.36	47.7125	4778.03	38.239	4642.82	44.9031	4732.75	39.003
4848.29	43.7374	4707.03	29.8716	4861.98	47.7694	4878.01	38.3797	4743.95	45.0434	4831.92	39.1789
4948.57	43.8379	4805.94	29.9237	4962.24	47.9794	4978.44	38.4891	4842.5	45.0706	4932.88	39.2839
5047.99	43.9234	4903.96	30.0087	5062.86	48.0691	5077.5	38.6141	4943.43	45.2632	5031.54	39.4065
5132.2	44.0002	4986.86	30.0436	5153.59	48.1248	5177.5	38.7243	5043.11	45.405	5132.61	39.507
5243.51	44.1001	5106.43	30.1269	5250.12	48.2059	5265.06	38.8091	5127.21	45.4781	5216.2	39.6151
5347.91	44.1808	5205.95	30.2002	5362.17	48.2743	5368.8	38.9205	5239.72	45.5967	5327.74	39.7225
5446.61	44.244	5307.47	30.2497	5461.79	48.3652	5477.52	39.0182	5342.25	45.7514	5431.67	39.8401
5547.9	44.3317	5406.69	30.3243	5561.95	48.4862	5577.02	39.1274	5443.68	45.8615	5531.06	39.9106
5646.37	44.4	5507.02	30.3834	5661.27	48.5859	5676.67	39.2136	5541.79	45.9375	5631.53	40.0079
5746.95	44.4839	5607.49	30.4293	5761.07	48.6757	5776.82	39.2948	5642.83	46.0602	5731.82	40.1183
5847.46	44.5456	5707.44	30.484	5861.26	48.7782	5876.61	39.3771	5741.91	46.1241	5830.87	40.1519
5947.12	44.5839	5808.29	30.5267	5961.19	48.9047	5976.56	39.4466	5842.7	46.2341	5931.44	40.2487
6046.94	44.6748	5906.9	30.5516	6061.32	49.0766	6077.35	39.5395	5942.81	46.3437	6030.64	40.377
6147.1	44.7318	6008.83	30.6079	6162.57	49.0936	6177.22	39.6243	6042.88	46.4102	6131.25	40.5072
6248.18	44.7968	6108.13	30.6566	6262.71	49.1311	6277.07	39.7156	6143.57	46.5029	6231.69	40.5811
6348.3	44.8501	6209.64	30.7178	6362.98	49.3258	6378.23	39.7976	6243.18	46.5743	6331.67	40.658
6447.71	44.9022	6310.66	30.7496	6462.64	49.3327	6478.66	39.8818	6343.38	46.6692	6432.69	40.687
6548.29	44.9576	6408.4	30.7742	6562.9	49.3791	6577.97	39.9394	6443.24	46.7362	6532.57	40.8263
6647.65	45.0108	6509.53	30.819	6661.95	49.4423	6678.9	40.0242	6543.45	46.6493	6632.59	40.8955
6747.72	45.0643	6608.26	30.8359	6763.32	49.4415	6777.93	40.0928	6643.6	46.8715	6732.77	40.9615
6848.9	45.0921	6710.55	30.886	6863.23	49.5297	6878.77	40.1564	6743.72	46.9517	6832.55	40.9876
6948.89	45.1461	6808.99	30.923	6963.18	49.631	6977.21	40.2286	6843.34	47.0123	6933.59	41.0611
7048.36	45.2032	6910.2	30.9601	7063.37	49.8227	7078.03	40.3032	6943.87	47.1013	7033.16	41.1256
7148.09	45.2448	7007.53	30.9865	7162.41	49.9071	7178.23	40.3593	7044.04	47.0564	7132.5	41.2504
7248.03	45.2796	7108.42	31.0084	7262.94	49.9687	7277.44	40.4013	7144.13	47.1088	7232.87	41.3104
7339.62	45.3153	7197.24	31.046	7341.72	49.9722	7376.96	40.4636	7243.13	46.9552	7332.21	41.3809
7436.18	45.371	7297.87	31.0902	7463.13	50.0725	7457.73	40.5214	7334.35	47.188	7423.68	41.4522
7548.17	45.3988	7409.93	31.1249	7561.05	50.1338	7578.58	40.581	7427.13	47.1649	7519.8	41.5242
7647.32	45.4535	7506.06	31.1318	7662.15	50.1768	7676.77	40.6489	7542.5	47.3724	7631.19	41.5511
7747.51	45.4842	7606.83	31.1735	7761.16	50.2213	7777.77	40.6845	7642.67	47.4749	7732.06	41.6194
7846.99	45.5141	7705.34	31.1846	7861.98	50.2729	7876.68	40.7464	7743.16	47.5469	7832.19	41.7052
7947.35	45.5546	7806.95	31.2109	7962.27	50.3242	7977.54	40.7858	7843.03	47.5872	7931.67	41.7086
8045.68	45.5926	7909.71	31.2373	8061.32	50.3406	8075.55	40.8254	7943.09	47.5868	8031.46	41.7671
8146.41	45.6269	8010.53	31.2762	8161.05	50.3115	8176.55	40.8866	8041.64	47.6694	8129.82	41.8857
8244.84	45.6738	8106.56	31.306	8260.17	50.4157	8275.76	40.9161	8141.97	47.6683	8230.97	41.9504
8345.92	45.7003	8206.23	31.3179	8360.34	50.4296	8375.75	40.9578	8240.89	47.7701	8328.68	41.9661
8444.64	45.7311	8303.94	31.3431	8459.62	50.5373	8476.07	41.0041	8341.25	47.822	8430.4	42.0397
8544.97	45.7533	8404.2	31.3704	8559.84	50.5242	8575.1	41.0414	8440.35	47.7458	8528.63	42.0599
8645.27	45.772	8504.47	31.385	8659.09	50.6031	8675.26	41.105	8541.01	47.8991	8629.82	42.1477
8745.02	45.8073	8607.17	31.4134	8759.25	50.5522	8774.55	41.1581	8639.31	47.949	8729.39	42.1358
8845.22	45.8325	8708.09	31.4362	8858.92	50.6895	8874.95	41.1996	8740.32	47.9204	8829.07	42.1941
8943.99	45.8845	8808.47	31.4552	8958.81	50.7428	8974.22	41.2477	8840.33	47.8775	8929.51	42.2498
9044.99	45.8972	8908.33	31.4842	9059.73	50.7243	9074.51	41.2822	8940.27	47.9939	9028.97	42.3389
9145.31	45.9298	9003.56	31.5075	9160.31	50.735	9175.25	41.3334	9041.12	48.1019	9130.08	42.3956
9246.76	45.952	9102.2	31.5085	9260.86	50.7831	9276.47	41.3801	9140.68	48.1078	9230.02	42.4534
9343.82	45.9768	9197.7	31.5259	9360.97	50.7816	9376.6	41.4191	9239.51	48.1265	9327.94	42.4797
9442.1	45.9943	9304.15	31.5445	9455.01	50.9122	9470.95	41.4574	9338.07	48.171	9426.94	42.5341
9539.53	46.0226	9405.16	31.5705	9561.05	50.952	9575.84	41.4874	9456.15	48.2194	9548.43	42.5596
9686.85	46.0845	9564.44	31.5993	9673.75	50.9826	9688.66	41.4967	9575.31	48.1348	9661.33	42.5577
9849.65	46.1184	9720.09	31.6306	9841.21	51.0514	9855.98	41.5456	9730.71	48.3727	9824.31	42.6525
10010.2	46.1539	9878.77	31.6626	9999.09	51.0994	10011.2	41.578	9903.16	48.4243	9999.63	42.7683
10179.7	46.1707	10049.2	31.7275	10165.1	51.0635	10179.2	41.6505	10073.1	48.4694	10169.6	42.847
10355.4	46.2447	10225.1	31.7198	10338.8	51.0818	10353.7	41.7142	10248.9	48.5272	10346.7	42.8704
10537.6	46.2819	10408.1	31.7582	10518.8	51.1419	10533.2	41.7933	10431.2	48.5256	10528.5	43.0005
10721.9	46.322	10594.5	31.8011	10700.1	51.2546	10716.9	41.8385	10616.9	48.5809	10714.2	43.0662
10911.8	46.3649	10784.7	31.8122	10890.7	51.3538	10902.6	41.8816	10806.1	48.4749	10903.9	43.1404
11101.2	46.3944	10973	31.8416	11081.1	51.4166	11095.2	41.9404	10997.1	48.7314	11095.9	43.2175
11296.3	46.4303	11167.8	31.8672	11274.2	51.441	11285.7	41.9884	11190.9	48.7861	11288.7	43.2703
11492.9	46.4613	11364.2	31.9034	11468.3	51.4055	11482.6	42.0541	11384.4	48.8438	11484.1	43.3258
11688.7	46.4978	11558.9	31.908	11665.7	51.553	11675.6	42.0855	11582.8	48.8921	11680.5	43.3707
11884.3	46.5362	11758.2	31.9462	11860.1	51.5968	11875	42.1379	11780.7	48.9247	11877	43.4457
12082.3	46.5744	11955.1	31.9607	12059.7	51.5833	12070.5	42.2002	11976	48.8484	12074.9	43.5287
12279.4	46.6188	12153.4	31.977	12255	51.6154	12269.8	42.2917	12175.3	48.8835	12272.4	43.56
12478.8	46.6568	12350.7	32.0098	12454.6	51.7123	12468.3	42.3244	12372.2	49.0708	12473.3	43.6817
12675.9	46.6742	12549.1	32.029	12650.8	51.7332	12666.3	42.3716	12571.8	49.1109	12671.9	43.7377
12876	46.6972	12748.3	32.0566	12852.2	51.7862	12866.8	42.4387	12772.6	49.1375	12869.3	43.8093
13076	46.7346	12943.7	32.0635	13051.1	51.7048	13063.1	42.4825	12968.9	49.1136	13068.9	43.8337
13274.6	46.7637	13146.1	32.0844	13252.2	51.877	13264	42.5214	13170.6	49.2079	13266.5	43.8887
13464.7	46.8109	13341.1	32.0958	13450.1	51.8233	13461.7	42.551	13367.5	49.2264	13465.9	43.9998
13633.9	46.8333	13516.4	32.1378	13615.5	51.9627	13662	42.6121	13568.9	49.3031	13666.6	43.9778
13870.1	46.8742	13720.5	32.1424	13840	51.997	13830.7	42.6662	13726.4	49.1991	13858.7	44.0578
14067.1	46.9028	13928.4	32.1827	14047.2	52.0314	14054.3	42.7128	13965.6	49.1821	14031.7	44.1091
14268.1	46.9394	14136	32.2003	14244.8	52.0731	14258.2	42.734	14166.2	49.3777	14263.7	44.2053
14464.7	46.9515	14337.7	32.206	14445.1	52.02	14458.9	42.7839	14365.1	49.4613	14463	44.2552
14665.4	46.9865	14536.6	32.226	14642.2	52.1154	14654.8	42.8187	14562.3	49.4892	14660.1	44.2629
14865.5	46.9857	14730.6	32.2385	14842	52.1691	14854.9	42.8544	14761.8	49.5245	14859.4	44.3727
15060.6	47.0083	14926.9	32.2629	15040.4	52.0919	15051.5	42.9085	14957.9	49.5533	15056	44.4239
15261.2	47.0523	15131.6	32.2802	15236.9	52.2132	15250.8	42.9362	15158.3	49.5814	15255.5	44.46
15456	47.0741	15331.2	32.2942	15436.2	52.2148	15448.7	42.9596	15354.1	49.6225	15454.2	44.4958
15655.2	47.0894	15534.6	32.3014	15632.5	52.2307	15649.7	42.9855	15553.9	49.5783	15650.9	44.5636
13464.7	46.8109
13633.9	46.8333
13870.1	46.8742
14067.1	46.9028
14268.1	46.9394
14464.7	46.9515
14665.4	46.9865
14865.5	46.9857
15060.6	47.0083
15261.2	47.0523
15456	47.0741
15655.2	47.0894

## Sheet: Fig. 7 and Fig. 8 (Mossbauer)
Al = 0.0				Al = 0.2,				Al = 0.4				Al = 0.6				Al = 0.8				Al= 1.0
15974 16006 16040 15911 16039								25544 25427 25762 25654 25560				19900 19814 19928 20026 19927				18104 18099 17954 18193 18129
16040 16183 15969 16008 16021				17903 17978 18111 17950 17987				25598 25546 25686 25685 25488				19915 19697 19997 19814 19764				18121 18075 18104 18093 18259				14739 15004 14901 14696 14783
16064 16037 16014 15912 15774				17957 17875 17947 17886 17860				25469 25704 25476 25430 25538				19695 19839 20066 19889 19790				18289 18008 18013 18340 18164				14890 14867 14647 14832 14713
16042 15958 16031 15863 15956				18080 18038 18088 18007 17875				25726 25353 25416 25729 25454				19693 19829 19755 19841 19654				17907 18087 18096 18286 17870				14520 14671 14725 14736 14729
15820 16055 15988 16029 15686				17979 18002 17885 18252 18028				25617 25562 25506 25189 25779				19749 19888 20106 19625 19990				17987 17873 18013 17793 17968				14649 14514 14642 15025 14620
15823 15836 15904 16017 15983				17666 18087 17813 17872 18014				25721 25386 25655 25473 25445				20154 19656 19791 19959 20075				18108 18297 18232 18237 17782				14843 15012 14532 14895 14511
15927 15929 16174 16006 16009				17816 18191 17932 18098 17928				25773 25380 25663 25913 25627				20131 19881 19851 19976 19566				18029 18091 17978 18151 18067				14782 14568 14846 14968 14721
16050 16018 15902 15912 16082				18123 17917 18058 18042 18210				25620 25680 25584 25303 25807				19869 19888 19828 19676 19876				17778 18082 18048 17766 17888				14622 14742 14753 14749 14657
15886 15948 15886 16038 16132				18084 18077 18018 18159 18002				25225 25653 25607 25433 25625				19907 19813 19750 19814 19714				18014 17958 17972 18024 18083				14893 14697 14879 14719 14869
16064 15716 16172 15725 16016				17894 17903 18158 18045 18028				25681 25438 25488 25660 25700				19961 19771 19973 20138 19933				18026 18051 17986 17967 18175				14821 14815 14686 14698 14764
15938 16140 16000 15839 15711				18053 17996 18130 18000 17902				25646 25418 25522 25378 25618				19680 19562 19988 19841 19935				18335 18231 17996 17781 18048				14964 14557 14609 14828 14827
15998 15801 16181 15935 15721				17974 17962 18141 18146 17797				25433 25764 25289 25426 25398				20070 19616 20014 19835 19776				18252 18075 18052 18120 18162				14628 14749 14662 14694 14853
15914 15929 16081 15835 15828				17899 18234 18024 17783 17998				25370 25347 25386 25202 25155				19418 19667 20036 19535 19718				17937 18050 17924 18129 18032				14766 14605 14678 14904 14814
16214 15779 15945 15937 15536				17923 17833 18007 17722 17854				25371 25707 25416 25826 25268				19660 19885 19728 19535 19732				18018 18291 18198 18116 18096				14529 14572 14576 14939 14622
15724 15603 15676 15592 15532				17857 17910 17928 17888 17718				25304 25132 24891 24954 25154				19817 19725 19817 19596 19417				18043 17931 17586 17780 17585				14758 14537 14748 14652 14822
15656 15581 15567 15402 15515				17731 17975 17948 17772 17425				25000 24650 24978 24830 24771				19609 19322 19555 19182 19193				17597 17743 17371 17469 17773				14793 14721 14803 14437 14698
15387 15539 15313 15307 15061				17486 17559 17576 17511 17498				25105 24403 24713 24700 24639				18880 19253 19125 19057 19317				17629 17497 17338 17782 17808				14516 14444 14439 14185 14295
15233 15372 15397 15443 15376				17514 17276 17345 17437 17192				24956 24784 24741 24878 24837				19206 18831 18885 19131 19238				17281 17437 17456 17467 17481				14231 14385 14146 14115 14326
15346 15615 15300 15464 15551				17331 17332 17073 17245 17687				24738 24985 25040 25179 24886				19420 19356 19478 19136 19076				17547 17679 17691 17562 17818				14335 14419 14220 14365 14073
15348 15586 15590 15396 15437				17447 17507 17587 17470 17598				24920 24932 24813 25333 24876				19473 19690 19313 19477 19399				17591 17782 17488 17532 17416				13964 14237 14262 14091 14157
15435 15665 15274 15141 15525				17554 17537 17506 17402 17447				24983 24920 24960 24731 24842				19159 19468 19127 19418 19332				17714 17411 17341 17603 17657				14125 14498 14437 14317 14269
15671 15597 15349 15425 15464				17621 17567 17452 17480 17314				24800 24664 24922 24870 24526				19322 19336 19392 19277 19385				17611 17695 17709 17546 17304				14508 14368 14115 14211 14129
15466 15584 15148 15503 15435				17293 17269 17465 17328 17474				24623 24811 24648 24584 24552				19146 19376 19126 19202 19190				17341 17450 17251 17438 17302				14200 14273 14228 14240 14344
15272 15409 15377 15305 15325				17646 17315 17501 17433 17291				24724 24702 24643 24633 24825				19200 18903 19058 19178 18903				17248 17254 17378 17370 17616				14337 14210 14362 14158 14039
15708 15541 15632 15506 15570				17513 17302 17459 17480 17481				25023 25168 25084 25107 25044				19282 19279 19226 19654 19369				17385 17273 17414 17661 17631				13994 14048 14047 14078 14124
15677 15675 15772 15776 15798				17295 17399 17554 17653 17788				25045 25215 25297 25013 25034				19552 19491 19529 19349 19722				17805 17703 17892 18006 17810				14255 14382 14292 14407 14462
15658 15796 15727 15981 15808				17771 17715 17626 17774 17717				25089 25378 25231 25336 25122				19543 19734 19618 19838 19581				18083 18013 17681 17956 17840				14118 14541 14453 14226 14570
15703 15883 15986 15796 15789				17894 17837 17807 17899 17740				25267 25400 25269 25393 25252				19773 19753 19811 19830 19843				18233 17974 17856 17963 17714				14363 14582 14437 14452 14647
15837 15880 15990 15733 15728				18147 17604 17851 17812 17914				25306 25568 25916 25201 25643				19774 19835 19675 19515 19599				17784 17929 18057 18015 17622				14662 14464 14535 14439 14477
15815 15829 15704 15735 15761				17728 17920 17828 17886 17837				25293 25125 25289 24889 25466				19783 19543 19856 19568 19588				18110 18054 18089 17997 18085				14607 14601 14706 14591 14665
15779 15814 15631 15216 15467				17818 18104 17754 17946 17874				24886 25097 24932 24487 24499				19684 19707 19349 18939 18793				17630 17505 17601 17556 17503				14795 14680 14577 14809 14412
15322 15175 15319 15316 15334				17532 17552 17576 17369 17514				24660 24534 24476 24451 24425				19025 18816 18990 18918 19193				17352 17152 17480 17414 17396				14394 14391 14529 14481 14356
15420 15572 15492 15641 15442				17350 17343 17414 17251 17420				24771 24892 24779 24893 25268				19289 19084 19335 19269 19196				17470 17524 17521 17339 17589				14087 14143 14205 14076 14156
15476 15491 15465 15433 15534				17437 17442 17405 17391 17243				24890 25102 25150 24739 25239				19339 19305 19507 19145 19422				17424 17785 17793 17660 17634				14402 14096 14221 14182 14220
15369 15236 15598 15435 15352				17623 17459 17408 17449 17290				24602 24459 24751 24617 24825				19266 19567 19150 19434 19320				17363 17641 17236 17669 17547				14224 14154 14404 14099 14225
15496 15483 15279 15218 15181				17325 17409 17450 17335 17568				24638 24514 24813 24482 24814				19382 19069 19172 19071 19231				17660 17454 17522 17347 17461				14334 14079 14061 14006 14047
15321 15275 15447 15369 15518				17517 17463 17305 17677 17222				24730 24688 24942 24897 24627				19186 19216 19147 19526 19539				17366 17274 17414 17609 17688				14365 14202 14170 14168 14118
15644 15644 15722 15638 15734				17448 17132 17387 17362 17523				24993 25431 25111 25473 25308				19425 19553 19699 19479 19699				17599 17346 18153 17744 18056				14222 14361 14200 14149 14146
15904 16026 15810 15671 16006				17590 17823 17959 17607 17750				25355 25249 25397 25282 25279				19681 19453 19641 19671 19650				17952 18154 17946 17497 18170				14399 14358 14234 14358 14644
15798 15903 15876 15871 15836				17984 17924 17981 17710 18042				25575 25700 25442 25367 25456				19830 19621 19679 19623 19851				18138 17976 18064 18088 17994				14379 14727 14598 14870 14804
16020 15997 15826 15973 16001				17961 17860 18036 18055 17799				25700 25366 25184 25335 25397				19643 19724 19891 19797 19856				17908 18239 18210 18212 18223				14738 14802 14504 14666 14724
15988 16121 15844 15851 15912				17802 17872 17910 17849 17871				25236 25582 25156 25755 25297				19867 19772 19748 19602 19691				18103 18071 17935 18061 18129				14775 14714 14751 14548 14738
15778 15902 15930 15782 15909				17916 18039 17814 18021 18209				25283 25785 25323 25181 25572				19689 20121 19771 19711 19697				17957 18002 17805 17886 18038				14871 14848 14605 14957 14868
15895 15948 15693 15973 15877				18045 17918 18059 17685 17980				25333 25506 25359 25298 25118				19708 19950 20095 19952 19778				17994 17898 17954 17943 18050				14617 14759 14502 14935 14801
15572 15848 15899 15763 15768				17892 17719 17938 17944 17741				25155 25490 25056 25382 25439				19746 19598 19717 19431 19587				18003 17922 17856 17720 17831				14692 14621 14848 14479 14574
15628 15442 15666 15537 15564				17850 17872 17704 18026 17868				25093 25034 25146 24845 24989				19547 19643 19525 19245 19135				17558 17849 17952 17623 17421				14628 14579 14602 14728 14487
15349 15351 15289 15406 15491				17925 17605 17666 17564 17466				24695 24923 24816 24684 24975				19115 19195 19050 19210 19441				17473 17381 17278 17219 17476				14716 14642 14295 14193 14102
15560 15514 15504 15378 15161				17453 17483 17361 17311 17393				24810 25133 24906 24876 24715				19211 19332 19392 19417 19300				17301 17264 17374 17167 17618				14177 13989 14276 14115 14398
15542 15552 15620 15601 15645				17584 17359 17535 17285 17305				24825 24705 24976 25181 25348				19400 19480 20025 19440 19519				17620 17550 17813 17674 17687				14197 14228 14285 14066 14074
15717 15745 15707 15610 16013				17464 17749 17662 17582 17657				25344 25292 25457 25510 25319				19559 19643 19869 19597 19567				17789 17742 18108 17897 18014				14271 14329 14407 14478 14413
15892 15835 16016 15833 15846				17714 17795 17726 17708 17886				25043 25479 25374 25365 25174				19593 19650 19666 19491 19633				18012 17950 18027 18079 18182				14587 14452 14651 14595 14612
15757 15838 15768 16005 15985				17930 17872 17657 17881 17595				25368 25473 25229 25468 25524				19807 19696 19607 19541 19716				17809 18146 17948 17841 18147				14576 14797 14482 14672 14562
15661 16179 16078 15860 16003				17681 17860 18088 18047 17739				25512 25456 25523 25500 25683				19704 19776 20023 20192 19690				18018 17951 18076 17935 17863				14714 14683 14903 14699 14948
15834 15813 15851 15969 15821				17893 17753 17769 18014 18039				25392 25516 25541 25315 25149				19968 19823 19568 19739 19564				18216 17945 17684 17810 17926				14643 14394 14747 14840 14870
15661 15955 15850 15694 15804				17630 18036 17902 17863 18021				25380 25272 25527 25191 25315				19781 19837 19817 19837 19526				17704 18068 17803 17893 17981				14573 14796 14843 14833 14740
15892 15644 15663 15691 15595				17900 18120 17665 17738 17937				25021 25285 25317 25029 25141				19711 19478 19529 19501 19404				17914 17894 17890 17695 17865				14641 14582 14767 14768 14529
15506 15344 15190 15385 15203				17925 17825 17977 17603 17447				24864 24575 24550 24783 24399				19097 19329 19174 19118 19044				17796 17752 17548 17490 17456				14362 14508 14456 14316 14320
15106 15186 15392 15468 15427				17347 17468 17254 17314 17458				24592 24747 24539 24297 24613				19111 18983 19186 19023 19240				17462 17402 17341 17582 17491				14373 13929 14124 14120 14124
15449 15571 15258 15622 15628				17310 17112 17053 17364 17226				24448 24994 25125 25003 25274				19253 19182 19443 19658 19571				17266 17564 17455 17781 17767				14184 14168 13763 14106 14208
15835 15906 15815 15788 15901				17396 17671 17629 17505 17617				25214 25389 25336 25246 25334				19752 19739 19795 19746 19511				17816 18071 18038 18071 17989				14408 14319 14475 14437 14533
15928 15913 15816 15902 15770				17783 18041 17823 17805 17981				25249 25574 25224 25622 25344				19787 19810 19529 19898 19710				17862 17705 18043 18273 18133				14597 14692 14722 14655 14525
15644 15708 15968 16114 15868				17834 18143 17793 17863 17939				25323 25343 25299 25617 25175				19801 19900 19851 19704 19972				17740 18010 17970 18149 18000				14816 14510 14642 14651 14705
15864 15743 15768 15698 15911				18040 18110 17933 18062 18002				25533 25083 25350 25250 25478				19690 20026 19843 19945 19996				18375 17818 18083 18065 17888				14484 14934 14642 14575 14579
15990 15775 15983 15999 15951				17705 18044 18130 17977 17969				25377 25625 25667 25447 25579				19795 19717 19916 19794 19887				17926 18103 17995 18117 17997				14700 14792 14681 14367 14545
16132 15821 15797 15846 15853				17892 17881 18157 17984 17665				25585 25030 25318 25337 25349				19857 20012 19862 19889 19909				18090 18137 17735 17911 17975				14751 14528 14640 14569 14682
15909 16125 16011 15735 15946				18106 17788 17993 17925 17812				25314 25308 25537 25363 25420				20030 19587 19614 20020 19602				18007 18149 17791 17965 17986				14678 14762 14689 14619 14609
15847 15643 15782 15739 15593				17891 18148 18040 18194 17614				25446 25333 25301 25434 25310				19403 19719 19617 19728 19423				18013 18073 17915 17867 17700				14799 14493 14782 14608 14416
15661 15567 16057 15664 15442				17847 17826 17649 17876 17810				24996 24983 25054 24720 25042				19565 19510 19571 19462 19250				17656 17929 17834 17526 17424				14405 14705 14384 14604 14431
15549 15189 15403 15274 15292				17742 17931 17808 17748 17504				24959 24954 24695 24591 24855				19311 19519 19203 18990 19295				17799 17527 17837 17317 17397				14409 14461 14556 14136 14211
15416 15238 15220 15321 15391				17496 17504 17419 17366 17346				24393 24487 24863 24751 24903				19171 19021 18992 19145 19401				17059 17207 17549 17405 17517				13897 14115 13982 14097 14153
15519 15632 15456 15321 15437				17391 17287 17377 17441 17665				24985 25055 24625 24511 24830				19191 19266 19531 18877 19201				17677 17359 17496 17262 17444				14087 14028 14081 14118 14238
14992 15305 14960 15142 15122				17488 17440 17415 17322 17332				24287 24524 24653 24461 24373				19111 18982 19290 18934 19225				17339 17338 17194 17355 17307				14141 14152 14172 14140 14259
15057 15263 15424 15206 15534				17491 17290 17096 17361 17322				24557 24456 24442 25134 24891				19106 18848 19247 19273 19293				17301 17439 17544 17736 17498				14066 14060 14332 14022 14189
15427 15371 15440 15327 15603				17501 17521 17190 17278 17519				24847 25034 24776 25165 25233				19292 19398 19163 19501 19338				17593 17561 17405 17921 17459				14461 14174 14236 14303 14432
15684 15604 15759 15795 15658				17625 17458 17338 17318 17490				24871 24947 25236 25173 25395				19553 19733 19672 19517 19409				17752 17880 18024 17932 17929				14457 14416 14373 14449 14385
15958 15607 15880 16192 15887				17483 17654 17940 17819 17891				25264 25110 25366 25190 25477				19623 19699 19558 19560 19550				17861 17972 17903 17858 17964				14598 14645 14432 14588 14846
15830 15774 15657 15748 16014				17750 17527 18026 17905 18013				25465 25370 24867 25404 25519				19447 19465 19791 19748 19938				18104 17811 18043 17786 17895				14507 14554 14568 14538 14830
15820 15722 15648 15727 15708				18047 17908 17476 17681 17868				25256 25227 25480 25227 25154				19720 19833 19608 19695 19476				17791 17775 17989 17808 17820				14587 14401 14673 14659 14424
15796 15791 15838 15601 15799				17895 17799 17842 17877 17930				25241 25538 24983 25075 24883				19512 19681 19634 19235 19212				17720 18067 17752 17512 17747				14433 14636 14618 14591 14390
15562 15279 15554 15240 15216				17737 17797 17775 17591 17632				25012 24790 24912 25020 24682				19431 19483 19435 19230 19013				17455 17396 17553 17563 17318				14492 14227 14322 14444 14041
15787 15441 15251 15316 15395				17577 17814 17494 17702 17595				24687 24682 24561 24426 24764				19183 19140 18990 19459 19093				17621 17229 17333 17466 17460				14177 14153 14331 14175 14075
15439 15425 15340 15316 15369				17533 17428 17291 17571 17268				24728 24735 24883 24833 24948				19104 19391 19209 19635 19168				17491 17544 17633 17610 17778				14345 14287 14343 14021 14255
15465 15680 15829 15517 15601				17307 17426 17448 17523 17377				24660 24663 24988 24893 25154				19504 19393 19229 19288 19275				17556 17576 17351 17683 17617				14193 14172 14193 14106 14211
15563 15563 15466 15407 15672				17546 17661 17515 17738 17827				25052 25236 25100 24781 24907				19426 19552 19519 19519 19298				17776 17629 17494 17721 17652				14291 14175 14227 14307 14128
15430 15377 15436 15494 15348				17626 17499 17617 17550 17619				24885 24838 24792 25088 24894				19440 19324 19126 19181 19080				17345 17558 17571 17736 17479				14261 14323 14169 14025 14425
15394 15330 15342 15332 15171				17573 17885 17598 17564 17484				24500 24832 24786 24672 24589				19394 19294 19263 19462 19121				17384 17465 17620 17531 17493				14337 14079 14516 14181 14211
15566 15208 15389 15375 15072				17251 17517 17245 17089 17264				25056 24540 24641 24674 24763				19152 19338 19384 19470 19318				17614 17419 17371 17255 17624				14247 14213 14038 14234 13967
15577 15179 15724 15584 15564				17442 17572 17261 17334 17403				24551 24733 24649 24645 24863				19080 19182 19277 19367 19446				17476 17424 17711 17757 17634				14412 14198 14189 14280 14276
15398 15362 15206 15633 15387				17386 17261 17610 17552 17470				24823 24963 25220 24729 25132				19226 19299 19298 19270 19478				17795 17639 17757 17507 17356				14283 14103 14350 14149 14455
15619 15588 15395 15450 15755				17479 17662 17550 17622 17702				24818 25128 24950 24876 25076				19577 19555 19428 19413 19429				17498 17567 17566 17557 18010				14303 14222 14107 14345 14367
15769 15728 15734 15791 16048				17442 17732 17532 17592 17692				24755 25294 25193 25434 25321				19268 19504 19932 19672 19877				17732 17698 18090 17913 17935				14347 14487 14403 14359 14381
15751 15909 15936 15784 15825				17857 17880 17684 17949 17870				25471 25540 25475 25824 25487				19642 19854 19847 19934 20136				18138 18085 18346 18131 18332				14503 14293 14767 14529 14796
15826 15934 16091 16049 16017				17942 17836 18025 18025 17954				25291 25392 25608 25407 25492				19797 20126 19840 19944 19695				18037 18250 17973 18129 18212				14607 14651 14747 14826 14695
15900 15998 15947 16088 15955				18072 18102 18011 17851 17876				25369 25521 25607 25421 25464				19907 19769 19644 19718 20013				17860 17915 18309 18166 17995				14853 14820 14619 14632 14747
16093 16065 15809 16093 16010				17899 17918 17642 17874 17799				25435 25399 25618 25478 25421				19715 19885 19832 19924 19785				18261 18144 18103 18256 18364				14947 14767 14701 14593 14787
16053 15835 15893 16061 15976				17934 17881 18086 17950 17798				25524 25552 25593 25471 25231				19802 19600 19986 19547 19733				18220 18239 18338 17847 18117				14665 14702 14829 14615 14869
15943 15967 16070 15819 15899				17878 18139 18334 17938 18262				25409 25657 25539 25566 25620				20023 19829 19634 19759 19982				18111 17987 18121 18009 18088				14820 14596 14678 14860 14624
16172 15738 15878 15949 16125				18345 18054 18171 18182 18086				25508 25474 25848 25732 25409				19906 20003 19953 19966 20011				17881 17919 17847 18105 18288				14825 14756 14559 14851 14714
16183 15878 15936 15742 15825				18141 17872 18026 17913 17993				25445 25573 25580 25489 25503				19838 19978 19791 19827 19836				18049 18317 18227 17979 18106				14865 14670 14789 14873 14521
15837 15815 15951 16063 16184				18037 17719 17910 18107 18066				25591 25570 25441 25331 25478				20067 19840 19909 20203 19835				18201 18126 18018 18184 18174				14681 14679 14895 14930 14747
15935 16193 16047 15981 15867				18140 17891 17989 18037 17891				25717 25784 25556 25426 25519				19774 19892 19941 19994 19770				18137 18102 18257 18196 18166				14679 15067 14923 14833 14934
15865 15909 16264 15835 16046				18031 17963 18186 17928 18039				25576 25600 25352 25574 25498				19948 19767 19911 20012 19915				17852 18034 17984 18087 18048				14801 14726 14649 14807 14948
16061 16018 15773 15893 15937				18244 17821 17995 18038 18117				25771 25416 25860 25662 25524				19840 19884 19887 19799 20021				18152 18193 18031 18039 17972				14738 14781 14900 14894 14871
16077 15780 16100 16045 16103				17998 18050 18249 17978 18079				25583 25521 25578 25517 25853				19998 19986 19883 19942 19752				18430 18073 18002 18156 18178				14844 14856 14942 14919 14863
16064 15941 16100 15777 15934				17660 17948 17907 17889 18203				25535 25440 25810 25506 25403				20125 19914 19959 19986 19901				18289 18036 18280 18027 18217				14819 14621 14735 14963 14699
15783 15836 15876 16049 15760				17959 17934 17937 17854 18133				25689 25431 26002 25300 25547				19870 19934 20071 19902 19850				18078 18130 18010 18296 18170				14770 14872 14980 14484 14952
15778 15927 16074 16143 15869				17777 17961 17908 18328 18283				25664 25456 25523 25577 25711				19763 20093 19855 19701 19790				18089 18201 18244 18130 17940				14596 14659 14922 14866 14845
15906 15711 16039 15705 16047				18151 17965 18155 17767 17988				25543 25732 25585 25517 25658				19738 19973 19761 19932 19795				17995 18024 18204 18163 18062				14915 14961 14815 14545 14741
16089 16107 15734 16049 16015				18189 17894 17988 18200 17999				25753 25430 25511 25488 25885				19853 20078 20188 19909 19815				18141 18296 18071 18263 18038				14634 14669 14977 14808 14613
15770 15860 15891 15793 15976				18070 18237 18107 17809 17923				25618 25594 25605 25710 25392				20116 19776 19784 20163 19798				18126 18038 18053 17953 17920				14726 14930 14891 14787 14649
15990 15799 16079 16043 15931				18014 17834 18085 18004 18141				25375 25658 25183 25408 25720				19755 19844 19695 20007 19790				18254 17941 18144 18030 18205				14768 14858 14736 14816 14790
15913 16045 16031 15869 16005				18130 17854 18110 18273 17996				25642 25394 25345 25348 25410				19870 19655 20173 19811 19685				18120 18072 18072 18213 18056				14801 14978 14890 14788 14790
16040 16028 15794 16043 15910				18099 18078 17945 17906 18172				25612 25606 25615 25428 25329				19705 19785 19865 19885 19771				18161 18128 17991 18230 18139				14761 14781 14915 14691 15058
15959 15976 15888 15816 16021				17889 17992 18067 17941 17964				25624 25553 25805 25504 25248				19515 19533 19874 19789 19600				17855 18170 17823 18193 18333				14799 14933 14864 14750 14930
15897 15814 15757 15963 15881				17931 17805 18111 18012 18108				25439 25295 25174 25415 25579				19778 19816 19513 19533 19735				18089 17868 17792 17827 17599				14907 14685 14705 14589 14964
15886 15768 15593 15567 15575				17771 17979 18147 18023 17816				25227 25141 24835 24813 25067				19720 19375 19375 19325 19451				17626 17761 17734 17673 17825				14765 14769 14746 14722 14641
15646 15620 15258 15614 15440				17556 17711 17605 17611 17624				25045 25012 25064 24893 24965				19414 19225 19608 19298 19350				17376 17711 17650 17762 17776				14304 14372 14535 14424 14526
15559 15529 15579 15286 15646				17502 17620 17740 17649 17713				24847 25087 25007 24971 24505				19394 19149 19359 19391 19135				17704 17691 17684 17783 17598				14392 14534 14403 14303 14400
15412 15493 15383 15367 15516				17322 17491 17360 17503 17350				24597 24891 24502 24674 24892				19480 19354 19134 19136 19276				17369 17531 17596 17400 17402				14308 14276 14654 14358 14589
15355 15547 15501 15312 15369				17547 17591 17764 17473 17222				24778 24906 25090 24995 24807				19281 19347 19440 19512 19220				17472 17488 17757 17612 17738				14292 14080 14257 14125 14438
15517 15473 15531 15623 15737				17334 17532 17303 17487 17633				24981 25045 24958 24715 24948				19215 19548 19521 19202 19324				17533 17705 17638 17687 17803				14469 14252 14014 14446 14425
15888 15574 15789 15619 15696				17361 17758 17586 17728 17725				25231 25283 25034 25181 25078				19415 19586 19558 19577 19313				17928 17766 17884 17902 17632				14147 14610 14410 14575 14167
15657 15592 15477 15625 15677				17796 17809 17751 17652 17757				24986 25128 25061 24863 24988				19746 19482 19413 19675 19421				17890 17616 17734 17848 17437				14451 14350 14510 14383 14316
15628 15658 15498 15351 15404				17370 17550 17601 17321 17523				25027 24835 24779 25156 24761				19581 19363 19274 19381 19262				17787 17629 17530 17620 17469				14287 14473 14396 14356 14471
15431 15400 15430 15333 15604				17594 17683 17497 17300 17418				24917 24886 24644 24660 24669				19147 19268 19157 19404 19222				17471 17345 17472 17575 17658				14427 14163 14339 14152 14389
15750 15674 15750 15725 15714				17514 17505 17418 17306 17490				24657 25049 24904 25428 25083				19316 19184 19393 19423 19779				17723 17604 17834 17921 17819				14222 14145 14316 14157 14419
15661 15955 15621 15827 15700				17637 17495 17620 17736 17801				25004 25422 25323 25239 25611				19518 19635 19612 19603 19444				17687 17887 17883 17918 17818				14425 14386 14248 14351 14477
15769 15773 15892 15797 15869				17873 17713 17894 17675 17765				25317 25213 25319 25433 25673				19810 19437 19788 19597 19461				17968 18121 17967 17950 18404				14113 14374 14442 14708 14757
15832 15907 15914 15744 15794				17846 17809 17817 17892 17859				25631 25298 25369 25467 25458				19846 19760 19866 19935 19837				18132 18218 17937 17985 18310				14502 14433 14559 14531 14650
15973 15876 15879 15979 15729				17855 17883 18030 18130 17933				25499 25429 25567 25621 25371				19776 19863 19583 19571 19691				18088 18024 17761 17818 17861				14663 14746 14672 14578 14586
15509 15649 15880 15602 15597				17995 17710 17870 17816 17839				25195 25338 25177 24751 24602				19485 19536 19523 19109 19489				17567 17854 17678 17769 17654				14582 14903 14539 14445 14562
15400 15489 15365 15452 15510				17959 17771 17887 17571 17522				24981 24857 25037 24952 25096				19300 19551 19331 19409 19352				17742 17402 17641 17499 17415				14520 14445 14401 14494 14421
15376 15269 15627 15182 15212				17738 17498 17628 17423 17518				24496 24764 24854 24498 24819				19180 19394 19087 19314 19028				17523 17397 17309 17475 17544				14467 14421 14215 14273 14106
15388 15279 15296 15457 15541				17293 17307 17385 17268 17129				24676 24880 24706 24598 24718				19196 18908 19228 19350 19200				17517 17452 17281 17797 17483				14430 14294 14148 14131 14135
15293 15663 15436 15438 15427				17219 17291 17338 17538 17541				24906 24775 25014 24744 24761				19336 19158 19602 19218 19274				17606 17707 17662 17555 17784				14055 14012 14203 14125 14362
15459 15381 15507 15458 15343				17335 17548 17341 17357 17532				24730 24899 24808 24643 25017				19351 19419 19105 19019 18964				17580 17595 17344 17490 17835				14167 14216 14134 14090 14171
15719 15737 15653 15782 15937				17241 17279 17216 17225 17327				24645 24848 25065 25163 25146				19411 19464 19615 19582 19524				17444 17572 17770 17947 17894				13965 13952 14102 14147 14073
15904 15885 15818 16001 15606				17708 17477 17768 17619 17836				25374 25488 25381 25310 25053				19423 19828 19793 19668 19753				18175 17853 17867 17856 18211				14297 14252 14243 14615 14345
15858 16037 15966 16046 15962				17948 17807 17952 17846 17935				25662 25564 25220 25336 25743				19768 19778 19675 20086 19770				18122 18084 17967 18016 17889				14336 14585 14481 14700 14607
15995 16073 16014 15982 16148				17926 17861 17973 17899 17934				25708 25563 25528 25475 25575				19793 19698 19699 20024 19899				18080 18300 18105 18041 18063				14723 14713 14798 15032 14749
15938 16167 15959 16069 15817				18032 17811 17898 18133 17942				25508 25661 25480 25689 25419				19758 19789 20136 19943 19760				18119 18421 18081 18102 18148				14858 14814 14814 14627 15035
15803 15977 15952 15896 16151				17913 17996 17958 18311 18114				25331 25539 25723 25840 25787				19985 19878 19764 19817 19991				18028 18163 18147 18033 18361				14721 14515 14573 14637 14856
15617 15709 15938 15876 15837				17961 17935 18152 17990 17973				25601 25172 25654 25570 25346				20108 19864 19989 19943 19793				18087 18177 18397 18126 18186				14883 14540 14667 14636 14778
16005 16123 16109 15986 15996				18076 17904 17990 17964 18107				25505 25718 25721 25786 25272				19754 19831 19888 19675 19810				18120 18174 18054 18009 18094				14979 14661 14558 14839 14724
16009 15998 16124 15933 15743				18030 18078 18076 18384 17824				25348 25243 25407 25422 25302				19742 20288 19860 19853 19619				18063 17958 18037 18015 18134				14590 14849 14750 14791 14870
15765 16104 15692 15664 15589				17923 17968 17806 17554 17948				25170 25149 24994 25085 25072				19554 19844 19585 19536 19478				17933 17893 17608 18034 17690				14898 14744 14743 14832 14575
15384 15497 15462 15361 15424				17720 17527 17909 17650 17721				25006 24504 24516 24726 24806				19424 19228 19145 19014 19079				17547 17555 17445 17329 17450				14850 14708 14540 14616 14328
15233 15412 15671 15702 15879				17277 17459 17226 17035 17500				24429 24738 24896 25100 24979				19228 19210 19465 19212 19676				17499 17546 17568 17697 17768				14369 14169 14338 14252 14205
15866 15832 15690 15785 16124				17351 17318 17199 17282 17645				25074 25270 25226 25217 25693				19661 19538 19628 19746 19971				17881 18050 17865 17941 17907				14000 14235 14162 14127 14421
15976 16079 16184 15646 15947				17663 17589 17920 17861 17713				25579 25427 25430 25772 25756				19840 19783 19648 19863 19965				18120 17896 18072 17944 18046				14474 14224 14552 14709 14429
16040 15952 15962 15780 16085				18323 17903 17983 18020 18018				25581 25441 25205 25577 25813				19893 19844 19914 20051 19867				18024 18269 18341 18304 17890				14748 14579 14984 14777 14863
15738 16064 15916 16054 15881				18123 17912 18152 17719 18112				25569 25662 25384 25666 25360				19691 19909 19474 19475 19894				18056 18030 18088 18087 18073				14819 14721 14614 14874 14750
16024 15962 16072 16055 15935				18045 17787 17983 17942 17946				25170 25642 25709 25433 25591				19712 19999 19654 19903 19620				18111 18178 18051 18118 18052				14995 14617 14968 14876 14676
16056 16126 15751 15787 15874				18074 17836 17983 18123 17922				25421 25314 25498 25868 25411				20066 19946 20398 20015 19693				17861 17885 17937 17841 18251				14881 14977 14809 14772 14588
15939 15820 16081 15808 15712				17960 18111 17896 18114 18041				25396 25250 25372 25488 25379				19830 19803 19862 19616 19607				17896 18077 17931 18198 17926				14579 14630 14783 14600 14727
15971 15858 15538 15783 15722				17909 18116 17717 18119 17936				25235 24966 25425 25215 25096				19542 19576 19649 19332 19210				17856 17851 17837 17793 17841				14607 14716 14850 14578 14657
15325 15458 15805 15389 15398				17637 17843 17874 17780 17551				24493 25059 25060 24843 24716				19484 19464 19323 19283 19372				17761 17722 17459 17455 17456				14710 14608 14515 14367 14358
15516 15464 15489 15390 15628				17573 17604 17512 17571 17597				24918 24919 24886 24830 24827				19434 19204 19308 19397 19171				17534 17658 17455 17522 17571				14505 14177 14212 14539 14342
15478 15569 15705 15978 15832				17667 17442 17509 17630 17597				24916 25090 25426 25506 25317				19133 19468 19515 19857 19714				17759 17392 17899 18014 17871				14030 14115 14016 14071 14209
15756 15955 16066 16035 16176				17506 17683 17937 17720 17965				25634 25357 25343 25419 25258				20107 19800 19659 19861 19710				17927 17822 18086 17966 18295				14194 14576 14732 14470 14607
16003 16047 15901 16017 15940				17944 17758 17799 17863 17896				25565 25468 25663 25398 25562				20029 20085 19866 19870 19684				18140 17999 18160 18255 18035				14726 14757 14772 14716 14612
16104 15974 16059 16005 15965				18001 17882 17918 17909 17955				25812 25562 25274 25410 25674				19965 19693 19812 19666 19782				17980 17986 17989 18129 18112				14531 14783 14796 14758 14774
16106 15931 15967 16038 15936				18328 18050 18053 18003 18060				25800 25713 25406 25665 25696				20182 19889 19922 19783 19838				18030 18284 18030 18322 18130				14823 14636 14648 14567 14597
15878 15977 16050 15757 16127				18089 18151 18064 17936 17659				25355 25575 25408 25456 25713				19805 19996 19662 19637 19863				18231 18206 18334 17815 18136				15006 14822 14648 14641 14795
16002 16053 15997 15992 15934				17999 17957 17822 17996 18159				25497 25788 25622 25444 25619				19953 19781 19939 19655 19933				18096 17958 17907 18148 17835				14659 14610 14840 14800 14835
15948 15833 16225 15732 15850				18343 18199 18161 17938 18097				25493 25590 25402 25512 25617				19854 19799 19758 19871 19718				17974 18008 18034 18037 17804				14980 14629 14754 14771 14805
15904 15934 15703 15727 15739				18258 18191 18054 18018 17954				25581 25557 25388 25371 25497				19931 19851 19671 19443 19722				17916 18008 17900 17507 17649				14806 14765 14770 14572 14802
15841 15938 15558 15845 15450				17609 18027 17964 17843 17701				25065 25144 24918 25021 24583				19314 19486 19397 19465 19349				17847 17574 17729 17573 17354				14863 14649 14541 14326 14459
15449 15361 15272 15434 15586				17811 17772 17457 17661 17475				24569 24586 24717 24827 25059				19158 19262 19175 19095 19205				17213 17437 17337 17645 17489				14256 14320 14363 14155 14058
15259 15552 15586 15409 15569				17575 17461 17222 17327 17304				24630 25097 24798 25269 24790				19465 19499 19296 19317 19627				17666 17777 17473 17718 17766				14179 14317 14389 14358 14312
15486 15498 15557 15584 15731				17446 17202 17244 17463 17493				25137 24816 25278 25059 25125				19576 19585 19350 19668 19531				17922 17494 18020 17679 17622				14346 14211 14461 14275 14208
15664 15726 15436 15524 15357				17631 17467 17496 17752 17434				24873 24972 24905 24712 24715				19595 19551 19215 19194 19506				17443 17440 17747 17361 17437				14367 14479 14412 14281 14290
15197 15591 15449 15428 15476				17674 17565 17579 17876 17474				24672 24806 24597 24788 24678				19213 19377 19197 19245 19186				17564 17518 17548 17596 17321				14311 14261 14096 14229 14360
15514 15434 15306 15358 15582				17415 17338 17569 17435 17639				24817 24807 24728 25027 24997				19277 19249 19456 19440 19411				17526 17421 17491 17427 17635				14189 14272 14335 14180 14175
15473 15850 15673 15900 15598				17377 17282 17338 17549 17687				25241 25255 25209 25287 25696				19594 19435 19640 19711 19782				17864 17711 17833 17996 18177				14162 14264 14294 14314 14407
16049 15872 15827 16042 16148				17448 17593 17964 17668 17857				25463 25431 25500 25406 25545				19562 19569 19960 19714 19739				18003 17859 17948 17768 18098				14332 14527 14523 14583 14699
15608 16074 15923 15863 15862				17959 17857 18085 18123 18072				25583 25591 25403 25671 25549				19835 19702 19544 19724 19860				17978 18047 18075 18073 17923				14657 14706 14862 14524 14679
15848 16140 15860 15884 16098				18021 17720 18110 18039 17795				25475 25659 25570 25529 25686				19865 19894 20009 19618 19647				18052 18380 18079 18115 18100				14730 14567 14587 14682 14702
15897 15653 15890 15936 15929				17927 17875 17777 17766 17975				25423 25425 25525 25325 25330				19691 19845 19839 19312 19744				18111 17995 17844 17984 17932				14746 14536 14619 14562 14551
15692 15643 15826 15808 15593				17835 17794 17733 17560 17801				25245 25113 25294 25088 25414				19467 19528 19444 19326 19519				18060 17846 17647 17600 17795				14502 14348 14470 14307 14538
15619 15623 15436 15543 15386				17789 17794 17651 17678 17580				25223 24872 25021 24733 24732				19581 19310 19387 19296 19129				17667 17464 17473 17620 17342				14372 14654 14310 14350 14328
15565 15284 15379 15253 15398				17253 17508 17670 17694 17283				24669 24613 24599 24556 24700				19142 19236 19278 19028 19438				17331 17297 17505 17343 17443				14523 14198 14075 14002 14137
15395 15666 15412 15553 15354				17471 17349 17304 17807 17230				24596 25051 24843 24676 24865				19305 19370 19307 19335 19481				17803 17301 17288 17526 17641				14065 14142 14186 14288 14451
15407 15381 15405 15566 15590				17241 17382 17278 17304 17498				24844 24818 24810 24734 24962				19327 19213 19489 19328 19362				17685 17645 17708 17673 17842				14179 14093 14494 14158 14131
15590 15596 15497 15567 15778				17363 17456 17504 17358 17622				24808 25110 24903 24730 25163				19485 19364 19379 19327 19565				17714 17882 17828 17831 17522				14186 14326 14324 14245 14217
15664 15745 15475 15505 15756				17627 17675 17279 17709 17479				25342 25214 24910 25095 24992				19507 19379 19299 19503 19374				17653 17643 17723 17851 17772				14350 14304 14210 14150 14379
15688 15695 15629 15645 15651				17532 17441 17624 17399 17819				24975 25121 25158 25177 25120				19610 19487 19239 19482 19339				17484 17597 17690 17790 17477				14324 14268 14265 14416 14333
15316 15231 15271 15407 15421				17303 17853 17348 17356 17745				24976 24960 24785 24469 24679				19224 19422 19456 19332 19314				17618 17594 17469 17549 17380				14423 14407 14057 14402 14121
15256 15687 15337 15530 15530				17400 17193 17236 17144 17442				24831 24703 25080 24926 24905				19145 19326 19258 19250 19118				17474 17515 17393 17790 17652				14093 14292 14177 14216 14152
15489 15564 15619 15769 15954				17323 17365 17444 17533 17617				25002 24957 24920 25059 25277				19447 19409 19754 19483 19496				17658 17604 17571 17732 17924				14383 14225 14027 14076 14605
15914 15921 15912 15982 15737				17419 17774 17549 17525 17941				25084 25224 25154 25208 25844				19497 19598 19613 19725 19905				17748 18072 17960 18050 17966				14382 14521 14501 14411 14512
15948 15903 15921 15912 15877				17772 17760 18044 17954 17916				25457 25469 25260 25341 25799				19913 19538 20003 19706 19873				18091 18111 18252 18279 18007				14607 14628 14857 14814 14549
15887 15902 15967 15922 16019				17925 18000 17883 17912 18168				25527 25657 25813 25497 25608				19969 20051 19943 20008 19793				17900 18082 18104 17958 18071				14501 14775 14610 14779 14713
16149 15773 15726 15951 15821				17980 17863 17896 18022 17921				25373 25800 25785 25573 25552				20067 19817 19907 19805 19972				18144 18004 18113 18104 18055				14822 14972 14958 14822 14993
16027 16098 15724 16019 16202				18273 17954 18076 18121 18000				25401 25872 25226 25438 25548				19925 19991 19984 20119 19897				18262 18220 18169 18298 18008				14756 15038 14703 14851 14738
16011 16164 16003 15872 15892				17924 17866 17777 17835 18001				25395 25462 25344 25593 25350				19722 20193 19950 19919 19886				18136 18340 18106 18228 18051				14914 14526 14789 14921 14838
15706 15720 15746 16104 15845				18025 17775 18034 18083 17975				25456 25610 25831 25339 25556				19616 19857 19841 20030 19792				17726 18111 18284 18381 18159				14552 14831 14693 14871 14722
15823 16095 15773 15970 15973				17987 17984 17890 17909 18067				25688 25425 25408 25649 25578				19998 20052 19584 19970 19932				18501 18122 17996 18003 18213				14973 14947 14733 15029 14644
15925 16107 15929 15937 15917				18183 18009 17966 17871 17941				25690 25630 25804 25592 25327				19950 19751 19863 19917 19839				17931 18180 18115 18211 18149				14742 14917 14608 14782 14944
16227 15795 16079 15908 15708				18205 17908 17939 18181 18128				25702 25779 25491 25530 25521				19767 19867 19800 20198 19717				18010 18192 18380 17950 18102				14857 14600 14848 14721 14727
15421 16016 15841 16061 16033				18012 18135 18152 17743 17926				25564 25546 25475 25634 25118				19930 19880 19724 19903 19975				18002 18034 18394 18407 18184				14699 14793 14905 14872 14730
16025 16180 15850 15931 15931				17921 18160 18089 17896 17915				25320 25551 25844 25372 25589				19872 19937 19792 19836 20093				18166 18098 17983 18159 18118				14758 14815 14594 14904 14813
15939 15836 15962 16111 15881				17734 18061 18067 18146 18068				25684 25567 25616 25505 25598				19943 20233 20008 19654 20099				18349 18185 18161 18249 17953				14998 14748 14812 14870 14530
16219 15970 16065 15964 15988				18099 18102 18104 18173 18080				25238 25547 25412 25655 25532				19722 19746 20062 19703 19823				17954 18072 17962 18251 18073				14824 14785 15157 15030 14763
16100 15790 15931 15885				18187 17947 18109 18230 18033				25566 25490 25315 25570				19832 19730 20006 19969				18154 18359 18068 18208				14731 14920 14948 14703 14762
				18187 18126 17995 17958																14734 14847 15022 14785

## Sheet: Fig. 14
	Cellular viability (%)	SD (%)
Cell control	100	3.82
	0.07 mg		0.7 mg
Particle type	Cellular viability (%)	SD (%)	Cellular viability (%)	SD (%)
0	85.84	24.07	89.16	5.67
0.2	71.02	10.24	65.46	1.547
0.4	71.17	10.45	67.75	6.99
0.6	69.81	4.96	74.83	22.08
0.8	49.97	5.78	59.21	2.89
1	68.57	10.21	64.32	6.49
